# Supplementary material
Source: publisher figshare collection journal article supplement (https://gsajournals.figshare.com/ndownloader/files/25117973)
Supplement: Supplementary file 1 [file 25117973]

Marker name,chromosome,position,strand,seqA,seqB,reference allele,alternate allele,tier,rsID,diagnostic,diagnostic_type,diagnostic_information,partial_diagnostic,diagnostic_allele,positive_threshold,negative_threshold,bowtie_unique,sex_inform_x,sex_inform_y,flags,diagnostic_birth,diagnostic_fixed
ZZECFP0007,0,0,,GCTGGAGTACAACTACATCAGCCACAACGTCTATATCACCGCCGACAAGC,,A,C,informative,,"""Greenish"" Fluorescent Protein (EGFP, EYFP, ECFP)",construct,g_FP,1,,17,5,0,0,0,,,
ZZECFP0009,0,0,,TGATATAGACGTTGTGGCTGATGTAGTTGTACTCCAGCTTGTGCCCCAGG,,A,C,informative,,"""Greenish"" Fluorescent Protein (EGFP, EYFP, ECFP)",construct,g_FP,1,,17,5,0,0,0,,,
ZZECFP0010,0,0,,AGTTGTACTCCAGCTTGTGCCCCAGGATGTTGCCGTCCTCCTTGAAGTCG,,A,C,informative,,"""Greenish"" Fluorescent Protein (EGFP, EYFP, ECFP)",construct,g_FP,1,,17,5,0,0,0,,,
ZZECFP0011,0,0,,CAAGCAGAAGAACGGCATCAAGGCCAACTTCAAGATCCGCCACAACATCG,,A,C,informative,,"""Greenish"" Fluorescent Protein (EGFP, EYFP, ECFP)",construct,g_FP,1,,17,5,0,0,0,,,
ZZECFP0012,0,0,,GAAGTTCGAGGGCGACACCCTGGTGAACCGCATCGAGCTGAAGGGCATCG,,A,C,informative,,"""Greenish"" Fluorescent Protein (EGFP, EYFP, ECFP)",construct,g_FP,1,,17,5,0,0,0,,,
ZZECFP0013,0,0,,ACTACATCAGCCACAACGTCTATATCACCGCCGACAAGCAGAAGAACGGC,,A,C,informative,,"""Greenish"" Fluorescent Protein (EGFP, EYFP, ECFP)",construct,g_FP,1,,17,5,0,0,0,,,
ZZECFP0014,0,0,,TGTTGCCGTCCTCCTTGAAGTCGATGCCCTTCAGCTCGATGCGGTTCACC,,A,C,informative,,"""Greenish"" Fluorescent Protein (EGFP, EYFP, ECFP)",construct,g_FP,1,,17,5,0,0,0,,,
ZZECFP0015,0,0,,TCTGCTTGTCGGCGGTGATATAGACGTTGTGGCTGATGTAGTTGTACTCC,,A,C,informative,,"""Greenish"" Fluorescent Protein (EGFP, EYFP, ECFP)",construct,g_FP,1,,17,5,0,0,0,,,
ZZECFP0016,0,0,,TCTTGAAGTTGGCCTTGATGCCGTTCTTCTGCTTGTCGGCGGTGATATAG,,A,C,informative,,"""Greenish"" Fluorescent Protein (EGFP, EYFP, ECFP)",construct,g_FP,1,,17,5,0,0,0,,,
ZZECFP0017,0,0,,GAAGCAGCACGACTTCTTCAAGTCCGCCATGCCCGAAGGCTACGTCCAGG,,A,C,informative,,"""Greenish"" Fluorescent Protein (EGFP, EYFP, ECFP)",construct,g_FP,1,,17,5,0,0,0,,,
ZZegfp0015,0,0,,CACGGGCAGCTTGCCGGTGGTGCAGATGAACTTCAGGGTCAGCTTGCCGT,,A,C,informative,,"""Greenish"" Fluorescent Protein (EGFP, EYFP, ECFP)",construct,g_FP,1,,17,5,0,0,0,,,
ZZegfp0016,0,0,,TGAAGAAGTCGTGCTGCTTCATGTGGTCGGGGTAGCGGCTGAAGCACTGC,,A,C,informative,,"""Greenish"" Fluorescent Protein (EGFP, EYFP, ECFP)",construct,g_FP,1,,17,5,0,0,0,,,
ZZegfp0018,0,0,,GCGAGGGCGATGCCACCTACGGCAAGCTGACCCTGAAGTTCATCTGCACC,,A,C,informative,,"""Greenish"" Fluorescent Protein (EGFP, EYFP, ECFP)",construct,g_FP,1,,17,5,0,0,0,,,
ZZegfp0019,0,0,,CCTGGACGTAGCCTTCGGGCATGGCGGACTTGAAGAAGTCGTGCTGCTTC,,A,C,informative,,"""Greenish"" Fluorescent Protein (EGFP, EYFP, ECFP)",construct,g_FP,1,,17,5,0,0,0,,,
ZZegfp0020,0,0,,AGCTTGCCGGTGGTGCAGATGAACTTCAGGGTCAGCTTGCCGTAGGTGGC,,A,C,informative,,"""Greenish"" Fluorescent Protein (EGFP, EYFP, ECFP)",construct,g_FP,1,,17,5,0,0,0,,,
ZZegfp0026,0,0,,TGGTGCCCATCCTGGTCGAGCTGGACGGCGACGTAAACGGCCACAAGTTC,,A,C,informative,,"""Greenish"" Fluorescent Protein (EGFP, EYFP, ECFP)",construct,g_FP,1,,17,5,0,0,0,,,
ZZEYFP0013,0,0,,TGAGCTACCAGTCCGCCCTGAGCAAAGACCCCAACGAGAAGCGCGATCAC,,A,C,informative,,"""Greenish"" Fluorescent Protein (EGFP, EYFP, ECFP)",construct,g_FP,1,,17,5,0,0,0,,,
ZZEYFP0014,0,0,,GCAAAGACCCCAACGAGAAGCGCGATCACATGGTCCTGCTGGAGTTCGTG,,A,C,informative,,"""Greenish"" Fluorescent Protein (EGFP, EYFP, ECFP)",construct,g_FP,1,,17,5,0,0,0,,,
ZZEYFP0017,0,0,,CTTTGCTCAGGGCGGACTGGTAGCTCAGGTAGTGGTTGTCGGGCAGCAGC,,A,C,informative,,"""Greenish"" Fluorescent Protein (EGFP, EYFP, ECFP)",construct,g_FP,1,,17,5,0,0,0,,,
ZZmcherr12,0,0,,CAAGGAGTTCATGCGCTTCAAGGTGCACATGGAGGGCTCCGTGAACGGCC,,A,C,informative,,"""Reddish"" fluorescent protein (tdTomato, mCherry)",construct,r_FP,1,,4,0.8,0,0,0,,,
ZZtdToma20,0,0,,TCTTCACCTTGTAGATCAGCGTGCCGTCCTGCAGGGAGGAGTCCTGGGTC,,A,C,informative,,"""Reddish"" fluorescent protein (tdTomato, mCherry)",construct,r_FP,1,,4,0.8,0,0,0,,,
ZZtdToma22,0,0,,TGTACGGCTCCAAGGCGTACGTGAAGCACCCCGCCGACATCCCCGATTAC,,A,C,informative,,"""Reddish"" fluorescent protein (tdTomato, mCherry)",construct,r_FP,1,,4,0.8,0,0,0,,,
ZZtdToma23,0,0,,CATGTACGGCTCCAAGGCGTACGTGAAGCACCCCGCCGACATCCCCGATT,,A,C,informative,,"""Reddish"" fluorescent protein (tdTomato, mCherry)",construct,r_FP,1,,4,0.8,0,0,0,,,
ZZtdToma25,0,0,,CTTCGCCTGGGACATCCTGTCCCCCCAGTTCATGTACGGCTCCAAGGCGT,,A,C,informative,,"""Reddish"" fluorescent protein (tdTomato, mCherry)",construct,r_FP,1,,4,0.8,0,0,0,,,
ZZblastR06,0,0,,CCGTTGCTCTTTCAATGAGGGTGGATTCTTCTTGAGACAAAGGCTTGGCC,,A,C,informative,,Blasticidin resistance,construct,BlastR,1,,7,1.8,0,0,0,,,
ZZblastR07,0,0,,GCTGCGCTGGCGACGCTGTAGTCTTCAGAGATGGGGATGCTGTTGATTGT,,A,C,informative,,Blasticidin resistance,construct,BlastR,1,,7,1.8,0,0,0,,,
ZZblastR08,0,0,,AGAGAGCTGCGCTGGCGACGCTGTAGTCTTCAGAGATGGGGATGCTGTTG,,A,C,informative,,Blasticidin resistance,construct,BlastR,1,,7,1.8,0,0,0,,,
ZZblastR09,0,0,,CATTGACACCAGTGAAGATGCGGCCGTCGCTAGAGAGAGCTGCGCTGGCG,,A,C,informative,,Blasticidin resistance,construct,BlastR,1,,7,1.8,0,0,0,,,
ZZblastR12,0,0,,CCGTTGCTCTTTCAATGAGGGTGGATTCTTCTTGAGACAAAGGCTTGGCC,,A,C,informative,,Blasticidin resistance,construct,BlastR,1,,7,1.8,0,0,0,,,
ZZblastR13,0,0,,GCTGCGCTGGCGACGCTGTAGTCTTCAGAGATGGGGATGCTGTTGATTGT,,A,C,informative,,Blasticidin resistance,construct,BlastR,1,,7,1.8,0,0,0,,,
ZZbpA00006,0,0,,CCTAATAAAATGAGGAAATTGCATCGCATTGTCTGAGTAGGTGTCATTCT,,A,C,informative,,Bovine growth hormone poly A signal sequence,construct,bpA,1,,6.5,2.5,0,0,0,,,
ZZbpA00007,0,0,,CCACTGTCCTTTCCTAATAAAATGAGGAAATTGCATCGCATTGTCTGAGT,,A,C,informative,,Bovine growth hormone poly A signal sequence,construct,bpA,1,,6.5,2.5,0,0,0,,,
ZZbpA00008,0,0,,CTGGAAGGTGCCACTCCCACTGTCCTTTCCTAATAAAATGAGGAAATTGC,,A,C,informative,,Bovine growth hormone poly A signal sequence,construct,bpA,1,,6.5,2.5,0,0,0,,,
ZZbpA00010,0,0,,CCCCCCAGAATAGAATGACACCTACTCAGACAATGCGATGCAATTTCCTC,,A,C,informative,,Bovine growth hormone poly A signal sequence,construct,bpA,1,,6.5,2.5,0,0,0,,,
ZZbpA00011,0,0,,CCTAATAAAATGAGGAAATTGCATCGCATTGTCTGAGTAGGTGTCATTCT,,A,C,informative,,Bovine growth hormone poly A signal sequence,construct,bpA,1,,6.5,2.5,0,0,0,,,
ZZbpA00012,0,0,,CCACTGTCCTTTCCTAATAAAATGAGGAAATTGCATCGCATTGTCTGAGT,,A,C,informative,,Bovine growth hormone poly A signal sequence,construct,bpA,1,,6.5,2.5,0,0,0,,,
ZZbpA00013,0,0,,CTGGAAGGTGCCACTCCCACTGTCCTTTCCTAATAAAATGAGGAAATTGC,,A,C,informative,,Bovine growth hormone poly A signal sequence,construct,bpA,1,,6.5,2.5,0,0,0,,,
ZZbpA00014,0,0,,CCCCCCAGAATAGAATGACACCTACTCAGACAATGCGATGCAATTTCCTC,,A,C,informative,,Bovine growth hormone poly A signal sequence,construct,bpA,1,,6.5,2.5,0,0,0,,,
ZZCas90002,0,0,+,GCAGACAGGCGGCTTCAGCAAAGAGTCTATCCTGCCCAAGAGGAACAGCG,,A,C,informative,,Cas9,construct,Cas9,1,,10,3,0,0,0,SPIKE,,
ZZCas90004,0,0,+,GACCGTGAAGCAGCTGAAAGAGGACTACTTCAAGAAAATCGAGTGCTTCG,,A,C,informative,,Cas9,construct,Cas9,1,,10,3,0,0,0,SPIKE,,
ZZCas90005,0,0,+,GATCTGCTATCTGCAAGAGATCTTCAGCAACGAGATGGCCAAGGTGGACG,,A,C,informative,,Cas9,construct,Cas9,1,,10,3,0,0,0,SPIKE,,
ZZCas90006,0,0,+,GGAAGAAGCTGTCGTCCACCTTGGCCATCTCGTTGCTGAAGATCTCTTGC,,A,C,informative,,Cas9,construct,Cas9,1,,10,3,0,0,0,SPIKE,,
ZZCas90008,0,0,+,TCAGCTGCTTCACGGTCACTTTCCGGTTGGTCTTGAACAGCAGGTCCACG,,A,C,informative,,Cas9,construct,Cas9,1,,10,3,0,0,0,SPIKE,,
ZZCas90009,0,0,+,CTTCTGGTCAGCACCTTGTTGTCGATGGAGTCGTCCTTCAGAAAGCTCTG,,A,C,informative,,Cas9,construct,Cas9,1,,10,3,0,0,0,SPIKE,,
ZZCas90010,0,0,+,CTCGCTCTTGGCGATCATCTTCCGCACGTCGTACACCTTGTAGTCGCCGT,,A,C,informative,,Cas9,construct,Cas9,1,,10,3,0,0,0,SPIKE,,
ZZchloR001,0,0,,AATGGCATCGTAAAGAACATTTTGAGGCATTTCAGTCAGTTGCTCAATGT,,A,C,informative,,Chloramphenicol acetyltransferase,construct,chlor,1,,6,2,0,0,0,,,
ZZchloR002,0,0,,AGCTAAGGAAGCTAAAATGGAGAAAAAAATCACTGGATATACCACCGTTG,,A,C,informative,,Chloramphenicol acetyltransferase,construct,chlor,1,,6,2,0,0,0,,,
ZZchloR003,0,0,,AATCACTGGATATACCACCGTTGATATATCCCAATGGCATCGTAAAGAAC,,A,C,informative,,Chloramphenicol acetyltransferase,construct,chlor,1,,6,2,0,0,0,,,
ZZchloR004,0,0,,GGCCGTAATATCCAGCTGAACGGTCTGGTTATAGGTACATTGAGCAACTG,,A,C,informative,,Chloramphenicol acetyltransferase,construct,chlor,1,,6,2,0,0,0,,,
ZZchloR005,0,0,,AATGTTCTTTACGATGCCATTGGGATATATCAACGGTGGTATATCCAGTG,,A,C,informative,,Chloramphenicol acetyltransferase,construct,chlor,1,,6,2,0,0,0,,,
ZZchloR006,0,0,,CCTTTTTAAAGACCGTAAAGAAAAATAAGCACAAGTTTTATCCGGCCTTT,,A,C,informative,,Chloramphenicol acetyltransferase,construct,chlor,1,,6,2,0,0,0,,,
ZZchloR007,0,0,,CAAGTTTTATCCGGCCTTTATTCACATTCTTGCCCGCCTGATGAATGCTC,,A,C,informative,,Chloramphenicol acetyltransferase,construct,chlor,1,,6,2,0,0,0,,,
ZZchloR008,0,0,,AAAATAAGCACAAGTTTTATCCGGCCTTTATTCACATTCTTGCCCGCCTG,,A,C,informative,,Chloramphenicol acetyltransferase,construct,chlor,1,,6,2,0,0,0,,,
ZZchloR009,0,0,,GGATATTACGGCCTTTTTAAAGACCGTAAAGAAAAATAAGCACAAGTTTT,,A,C,informative,,Chloramphenicol acetyltransferase,construct,chlor,1,,6,2,0,0,0,,,
ZZcre00001,0,0,,TCTTCTATATCTTCAGGCGCGCGGTCTGGCAGTAAAAACTATCCAGCAAC,,A,C,informative,,Cre recombinase,construct,Cre,1,,10,4,0,0,0,,,
ZZcre00002,0,0,,CCTGAAGATGTTCGCGATTATCTTCTATATCTTCAGGCGCGCGGTCTGGC,,A,C,informative,,Cre recombinase,construct,Cre,1,,10,4,0,0,0,,,
ZZcre00003,0,0,,CAAGTTGAATAACCGGAAATGGTTTCCCGCAGAACCTGAAGATGTTCGCG,,A,C,informative,,Cre recombinase,construct,Cre,1,,10,4,0,0,0,,,
ZZcre00004,0,0,,GATGAAGCATGTTTAGCTGGCCCAAATGTTGCTGGATAGTTTTTACTGCC,,A,C,informative,,Cre recombinase,construct,Cre,1,,10,4,0,0,0,,,
ZZcre00005,0,0,,GTTTTTACTGCCAGACCGCGCGCCTGAAGATATAGAAGATAATCGCGAAC,,A,C,informative,,Cre recombinase,construct,Cre,1,,10,4,0,0,0,,,
ZZcre00006,0,0,,AGAAGATAATCGCGAACATCTTCAGGTTCTGCGGGAAACCATTTCCGGTT,,A,C,informative,,Cre recombinase,construct,Cre,1,,10,4,0,0,0,,,
ZZcre00008,0,0,,TCTGGCAGTAAAAACTATCCAGCAACATTTGGGCCAGCTAAACATGCTTC,,A,C,informative,,Cre recombinase,construct,Cre,1,,10,4,0,0,0,,,
ZZcre00010,0,0,,CATTGCTGTCACCGGCATCAACGTTTTCTTTTCTGATCCGCCGCATAACC,,A,C,informative,,Cre recombinase,construct,Cre,1,,10,4,0,0,0,,,
ZZcre00011,0,0,,GGATCCGCCGCATAACCAGTGAAACAGCATTGCTGTCACTTGGTCGTGGC,,A,C,informative,,Cre recombinase,construct,Cre,1,,10,4,0,0,0,,,
ZZcreERT03,0,0,,CATTACCGGTCGATGCAACGAGTGATGAGGTTCGCAAGAACCTGATGGAC,,A,C,informative,,Cre recombinase,construct,Cre,1,,10,4,0,0,0,,,
ZZcreERT05,0,0,,ACAGAAGCATTTTCCAGGTATGCTCAGAAAACGCCTGGCGATCCCTGAAC,,A,C,informative,,Cre recombinase,construct,Cre,1,,10,4,0,0,0,,,
ZZcreERT06,0,0,,AACGCCTGGCGATCCCTGAACATGTCCATCAGGTTCTTGCGAACCTCATC,,A,C,informative,,Cre recombinase,construct,Cre,1,,10,4,0,0,0,,,
ZZcreERT08,0,0,,CATTACCGGTCGATGCAACGAGTGATGAGGTTCGCAAGAACCTGATGGAC,,A,C,informative,,Cre recombinase,construct,Cre,1,,10,4,0,0,0,,,
ZZcreERT09,0,0,,ACAGAAGCATTTTCCAGGTATGCTCAGAAAACGCCTGGCGATCCCTGAAC,,A,C,informative,,Cre recombinase,construct,Cre,1,,10,4,0,0,0,,,
ZZcreERT10,0,0,,AACGCCTGGCGATCCCTGAACATGTCCATCAGGTTCTTGCGAACCTCATC,,A,C,informative,,Cre recombinase,construct,Cre,1,,10,4,0,0,0,,,
ZZDTA00001,0,0,,TTGATTCTTCTAAATCTTTTGTGATGGAAAACTTTTCTTCGTACCACGGG,,A,C,informative,,Diptheria toxin,construct,DTA,1,,10,3,0,0,0,,,
ZZDTA00002,0,0,,AAAAGGTATACACTTTTCTTCGTACCACGGGACTAAACCTGGTTATGTAG,,A,C,informative,,Diptheria toxin,construct,DTA,1,,10,3,0,0,0,,,
ZZDTA00003,0,0,,AATCTACATAACCAGGTTTAGTCCCGTGGTACGAAGAAAAGTTTTCCATC,,A,C,informative,,Diptheria toxin,construct,DTA,1,,10,3,0,0,0,,,
ZZDTA00004,0,0,,CCAGGTTTAGTCCCGTGGTACGAAGAAAAGTTTTCCATCACAAAAGATTT,,A,C,informative,,Diptheria toxin,construct,DTA,1,,10,3,0,0,0,,,
ZZDTA00005,0,0,,GAAGAAAAGTTTTCCATCACAAAAGATTTAGAAGAATCAACAACATCATC,,A,C,informative,,Diptheria toxin,construct,DTA,1,,10,3,0,0,0,,,
ZZDTA00006,0,0,,TGGTACACAAGGAAATTATGACGATGATTGGAAAGGGTTTTATAGTACCG,,A,C,informative,,Diptheria toxin,construct,DTA,1,,10,3,0,0,0,,,
ZZDTA00007,0,0,,TCAAAAAGGTATACAAAAGCCAAAATCTGGTACACAAGGAAATTATGACG,,A,C,informative,,Diptheria toxin,construct,DTA,1,,10,3,0,0,0,,,
ZZDTA00008,0,0,,CTGGTTATGTAGATTCCATTCAAAAAGGTATACAAAAGCCAAAATCTGGT,,A,C,informative,,Diptheria toxin,construct,DTA,1,,10,3,0,0,0,,,
ZZDTA00009,0,0,,GCAGCGTCGTATTTATTGTCGGTACTATAAAACCCTTTCCAATCATCGTC,,A,C,informative,,Diptheria toxin,construct,DTA,1,,10,3,0,0,0,,,
ZZDTA00010,0,0,,TTCCAATCATCGTCATAATTTCCTTGTGTACCAGATTTTGGCTTTTGTAT,,A,C,informative,,Diptheria toxin,construct,DTA,1,,10,3,0,0,0,,,
ZZDTA00011,0,0,,GTACCAGATTTTGGCTTTTGTATACCTTTTTGAATGGAATCTACATAACC,,A,C,informative,,Diptheria toxin,construct,DTA,1,,10,3,0,0,0,,,
ZZCAG00002,0,0,,TGTAACGCGGAACTCCATATATGGGCTATGAACTAATGACCCCGTAATTG,,A,C,informative,,hCMV enhancer version a,construct,hCMV_a,1,,5.5,2.5,0,0,0,,,
ZZCAG00003,0,0,,ATATATGGGCTATGAACTAATGACCCCGTAATTGATTACTATTAATAACT,,A,C,informative,,hCMV enhancer version a,construct,hCMV_a,1,,5.5,2.5,0,0,0,,,
ZZCMV00001,0,0,,AATCAATTACGGGGTCATTAGTTCATAGCCCATATATGGAGTTCCGCGTT,,A,C,informative,,hCMV enhancer version a,construct,hCMV_a,1,,5.5,2.5,0,0,0,,,
ZZCMV00004,0,0,,GGCGGGCCATTTACCGTAAGTTATGTAACGCGGAACTCCATATATGGGCT,,A,C,informative,,hCMV enhancer version a,construct,hCMV_a,1,,5.5,2.5,0,0,0,,,
ZZCMV00011,0,0,,AATCAATTACGGGGTCATTAGTTCATAGCCCATATATGGAGTTCCGCGTT,,A,C,informative,,hCMV enhancer version a,construct,hCMV_a,1,,5.5,2.5,0,0,0,,,
ZZCMV00013,0,0,,GGCGGGCCATTTACCGTAAGTTATGTAACGCGGAACTCCATATATGGGCT,,A,C,informative,,hCMV enhancer version a,construct,hCMV_a,1,,5.5,2.5,0,0,0,,,
ZZCAG00006,0,0,,TGTTCCCATAGTAACGCCAATAGGGACTTTCCATTGACGTCAATGGGTGG,,A,C,informative,,hCMV enhancer version b,construct,hCMV_b,1,,6,2.7,0,0,0,,,
ZZCAG00007,0,0,,TCAATAATGACGTATGTTCCCATAGTAACGCCAATAGGGACTTTCCATTG,,A,C,informative,,hCMV enhancer version b,construct,hCMV_b,1,,6,2.7,0,0,0,,,
ZZCAG00008,0,0,,CCCCGCCCATTGACGTCAATAATGACGTATGTTCCCATAGTAACGCCAAT,,A,C,informative,,hCMV enhancer version b,construct,hCMV_b,1,,6,2.7,0,0,0,,,
ZZCAG00009,0,0,,CCGCCCAACGACCCCCGCCCATTGACGTCAATAATGACGTATGTTCCCAT,,A,C,informative,,hCMV enhancer version b,construct,hCMV_b,1,,6,2.7,0,0,0,,,
ZZCAG00011,0,0,,TCAATGGAAAGTCCCTATTGGCGTTACTATGGGAACATACGTCATTATTG,,A,C,informative,,hCMV enhancer version b,construct,hCMV_b,1,,6,2.7,0,0,0,,,
ZZCMV00002,0,0,,TATATGGAGTTCCGCGTTACATAACTTACGGTAAATGGCCCGCCTGGCTG,,A,C,informative,,hCMV enhancer version b,construct,hCMV_b,1,,6,2.7,0,0,0,,,
ZZCMV00008,0,0,,ATAGTAACGCCAATAGGGACTTTCCATTGACGTCAATGGGTGGAGTATTT,,A,C,informative,,hCMV enhancer version b,construct,hCMV_b,1,,6,2.7,0,0,0,,,
ZZCMV00009,0,0,,GCCATTTACCGTCATTGACGTCAATAGGGGGCGTACTTGGCATATGATAC,,A,C,informative,,hCMV enhancer version b,construct,hCMV_b,1,,6,2.7,0,0,0,,,
ZZCMV00010,0,0,,ACTTGATGTACTGCCAAGTGGGCAGTTTACCGTAAATACTCCACCCATTG,,A,C,informative,,hCMV enhancer version b,construct,hCMV_b,1,,6,2.7,0,0,0,,,
ZZCMV00012,0,0,,TATATGGAGTTCCGCGTTACATAACTTACGGTAAATGGCCCGCCTGGCTG,,A,C,informative,,hCMV enhancer version b,construct,hCMV_b,1,,6,2.7,0,0,0,,,
ZZCMV00014,0,0,,ATAGTAACGCCAATAGGGACTTTCCATTGACGTCAATGGGTGGAGTATTT,,A,C,informative,,hCMV enhancer version b,construct,hCMV_b,1,,6,2.7,0,0,0,,,
ZZTK000004,0,0,,AGATGCAGTCGGGGCGGCGCGGTCCCAGGTCCACTTCGCATATTAAGGTG,,A,C,informative,,Herpesvirus TK promoter,construct,hTK_pr,1,,1,0.35,0,0,0,,,
ZZTK000007,0,0,,TCGGTGTTCGAGGCCACACGCGTCACCTTAATATGCGAAGTGGACCTGGG,,A,C,informative,,Herpesvirus TK promoter,construct,hTK_pr,1,,1,0.35,0,0,0,,,
ZZicre0009,0,0,,TTTCTGATTCTCCTCATCACCAGGGACACAGCATTGGAGTCAGAAGGGCG,,A,C,informative,,iCre recombinase,construct,iCre,1,,5.5,1.8,0,0,0,,,
ZZicre0013,0,0,,CCAGAGGCCTGGCTGTGAAGACCATCCAACAGCACCTGGGCCAGCTCAAC,,A,C,informative,,iCre recombinase,construct,iCre,1,,5.5,1.8,0,0,0,,,
ZZicre0016,0,0,,GGTGCTGTTGGATGGTCTTCACAGCCAGGCCTCTGGCTTGCAGGTACAGG,,A,C,informative,,iCre recombinase,construct,iCre,1,,5.5,1.8,0,0,0,,,
ZZicre0017,0,0,,ATCCACATTCTCCTTTCTGATTCTCCTCATCACCAGGGACACAGCATTGG,,A,C,informative,,iCre recombinase,construct,iCre,1,,5.5,1.8,0,0,0,,,
ZZicre0018,0,0,,GGAGATCTGGCCTGCCTCGCCCTTCTGACTCCAATGCTGTGTCCCTGGTG,,A,C,informative,,iCre recombinase,construct,iCre,1,,5.5,1.8,0,0,0,,,
ZZicre0019,0,0,,GTGAAGACCATCCAACAGCACCTGGGCCAGCTCAACATGCTGCACAGGAG,,A,C,informative,,iCre recombinase,construct,iCre,1,,5.5,1.8,0,0,0,,,
ZZicre0020,0,0,,TGAGGGACTACCTCCTGTACCTGCAAGCCAGAGGCCTGGCTGTGAAGACC,,A,C,informative,,iCre recombinase,construct,iCre,1,,5.5,1.8,0,0,0,,,
ZZicre0021,0,0,,TCTCTCCCCAGCATCCACATTCTCCTTTCTGATTCTCCTCATCACCAGGG,,A,C,informative,,iCre recombinase,construct,iCre,1,,5.5,1.8,0,0,0,,,
ZZemcIRE11,0,0,,AATAACATATAGACAAACGCACACCGGCCTTATTCCAAGCGGCTTCGGCC,,A,C,informative,,Internal Ribosome Entry Site,construct,IRES,1,,3,1.2,0,0,0,,,
ZZemcIRE12,0,0,,GGAACTGCTTCCTTCACGACATTCAACAGACCTTGCATTCCTTTGGCGAG,,A,C,informative,,Internal Ribosome Entry Site,construct,IRES,1,,3,1.2,0,0,0,,,
ZZemcIRES1,0,0,,GAAGCCGCTTGGAATAAGGCCGGTGTGCGTTTGTCTATATGTTATTTTCC,,A,C,informative,,Internal Ribosome Entry Site,construct,IRES,1,,3,1.2,0,0,0,,,
ZZemcIRES2,0,0,,CGCTTGGAATAAGGCCGGTGTGCGTTTGTCTATATGTTATTTTCCACCAT,,A,C,informative,,Internal Ribosome Entry Site,construct,IRES,1,,3,1.2,0,0,0,,,
ZZemcIRES3,0,0,,CGTTTGTCTATATGTTATTTTCCACCATATTGCCGTCTTTTGGCAATGTG,,A,C,informative,,Internal Ribosome Entry Site,construct,IRES,1,,3,1.2,0,0,0,,,
ZZemcIRES9,0,0,,TCCCCTCTCGCCAAAGGAATGCAAGGTCTGTTGAATGTCGTGAAGGAAGC,,A,C,informative,,Internal Ribosome Entry Site,construct,IRES,1,,3,1.2,0,0,0,,,
ZZfirluc01,0,0,,GTAACAACCGCGAAAAAGTTGCGCGGAGGAGTTGTGTTTGTGGACGAAGT,,A,C,informative,,Luciferase,construct,Luc,1,,9,1.3,0,0,0,,,
ZZfirluc02,0,0,,CCAACACCCCAACATCTTCGACGCAGGTGTCGCAGGTCTTCCCGACGATG,,A,C,informative,,Luciferase,construct,Luc,1,,9,1.3,0,0,0,,,
ZZfirluc04,0,0,,GTGCGCTGCTGGTGCCAACCCTATTCTCCTTCTTCGCCAAAAGCACTCTG,,A,C,informative,,Luciferase,construct,Luc,1,,9,1.3,0,0,0,,,
ZZfirluc05,0,0,,TGGATTCTAAAACGGATTACCAGGGATTTCAGTCGATGTACACGTTCGTC,,A,C,informative,,Luciferase,construct,Luc,1,,9,1.3,0,0,0,,,
ZZfirluc06,0,0,,ACATTTATAATGAACGTGAATTGCTCAACAGTATGGGCATTTCGCAGCCT,,A,C,informative,,Luciferase,construct,Luc,1,,9,1.3,0,0,0,,,
ZZfirluc07,0,0,,CGGTGTTGGGCGCGTTATTTATCGGAGTTGCAGTTGCGCCCGCGAACGAC,,A,C,informative,,Luciferase,construct,Luc,1,,9,1.3,0,0,0,,,
ZZfirluc08,0,0,,TGGTTCCTGGAACAATTGCTTTTACAGATGCACATATCGAGGTGGACATC,,A,C,informative,,Luciferase,construct,Luc,1,,9,1.3,0,0,0,,,
ZZfirluc09,0,0,,GCTATGAAGAGATACGCCCTGGTTCCTGGAACAATTGCTTTTACAGATGC,,A,C,informative,,Luciferase,construct,Luc,1,,9,1.3,0,0,0,,,
ZZluci0003,0,0,,GAGATACGCCCTGGTTCCTGGAACAATTGCTTTTACAGATGCACATATCG,,A,C,informative,,Luciferase,construct,Luc,1,,9,1.3,0,0,0,,,
ZZluci0007,0,0,,CCAGCGGATAGAATGGCGCCGGGCCTTTCTTTATGTTTTTGGCGTCTTCC,,A,C,informative,,Luciferase,construct,Luc,1,,9,1.3,0,0,0,,,
ZZrtTA2S10,0,0,,GGGGGCATAGAATCGGTGGTAGGTGTCTCTCTTTCCTCTTTTGCTACTTG,,A,C,informative,,Reverse improved tetracycline-controlled transactivator,construct,rtTA,1,,6,1.5,0,0,0,,,
ZZrtTA2S11,0,0,,GAAGTGGGGGCATAGAATCGGTGGTAGGTGTCTCTCTTTCCTCTTTTGCT,,A,C,informative,,Reverse improved tetracycline-controlled transactivator,construct,rtTA,1,,6,1.5,0,0,0,,,
ZZrtTA2S18,0,0,,GGGGGCATAGAATCGGTGGTAGGTGTCTCTCTTTCCTCTTTTGCTACTTG,,A,C,informative,,Reverse improved tetracycline-controlled transactivator,construct,rtTA,1,,6,1.5,0,0,0,,,
ZZrtTA2S19,0,0,,GAAGTGGGGGCATAGAATCGGTGGTAGGTGTCTCTCTTTCCTCTTTTGCT,,A,C,informative,,Reverse improved tetracycline-controlled transactivator,construct,rtTA,1,,6,1.5,0,0,0,,,
ZZrtTA2S20,0,0,,AGACTTTCTGCGGAACAACGCCAAGTCATACCGCTGTGCTCTCCTCTCAC,,A,C,informative,,Reverse improved tetracycline-controlled transactivator,construct,rtTA,1,,6,1.5,0,0,0,,,
ZZrtTA2S21,0,0,,CAAGACTTTCTGCGGAACAACGCCAAGTCATACCGCTGTGCTCTCCTCTC,,A,C,informative,,Reverse improved tetracycline-controlled transactivator,construct,rtTA,1,,6,1.5,0,0,0,,,
ZZrtTA2SM8,0,0,,AGACTTTCTGCGGAACAACGCCAAGTCATACCGCTGTGCTCTCCTCTCAC,,A,C,informative,,Reverse improved tetracycline-controlled transactivator,construct,rtTA,1,,6,1.5,0,0,0,,,
ZZrtTA2SM9,0,0,,CAAGACTTTCTGCGGAACAACGCCAAGTCATACCGCTGTGCTCTCCTCTC,,A,C,informative,,Reverse improved tetracycline-controlled transactivator,construct,rtTA,1,,6,1.5,0,0,0,,,
ZZSV400001,0,0,,AGTGTCCTGGAAGCTTGTAACAGAGTATGCAATGGAAACAAAATGTGATG,,A,C,informative,,SV40 large T antigen,construct,SV40,1,,11,3,0,0,0,,,
ZZSV400002,0,0,,ACAAGTGTCCTGGAAGCTTGTAACAGAGTATGCAATGGAAACAAAATGTG,,A,C,informative,,SV40 large T antigen,construct,SV40,1,,11,3,0,0,0,,,
ZZSV400003,0,0,,AGAAGAAGCAGAGGAAACTAAACAAGTGTCCTGGAAGCTTGTAACAGAGT,,A,C,informative,,SV40 large T antigen,construct,SV40,1,,11,3,0,0,0,,,
ZZSV400004,0,0,,TCCAGAAGAAGCAGAGGAAACTAAACAAGTGTCCTGGAAGCTTGTAACAG,,A,C,informative,,SV40 large T antigen,construct,SV40,1,,11,3,0,0,0,,,
ZZSV400005,0,0,,TCCTTTAACCCACCTGGCAAACTTTCCTCAATAACAGAAAATGGATCTCT,,A,C,informative,,SV40 large T antigen,construct,SV40,1,,11,3,0,0,0,,,
ZZSV400006,0,0,,TCATGCTCCTTTAACCCACCTGGCAAACTTTCCTCAATAACAGAAAATGG,,A,C,informative,,SV40 large T antigen,construct,SV40,1,,11,3,0,0,0,,,
ZZSV400007,0,0,,TGTTTAGTTTCCTCTGCTTCTTCTGGATTAAAATCATGCTCCTTTAACCC,,A,C,informative,,SV40 large T antigen,construct,SV40,1,,11,3,0,0,0,,,
ZZSV400008,0,0,,AGCTTCCAGGACACTTGTTTAGTTTCCTCTGCTTCTTCTGGATTAAAATC,,A,C,informative,,SV40 large T antigen,construct,SV40,1,,11,3,0,0,0,,,
ZZSV400009,0,0,,CATTTTGTTTCCATTGCATACTCTGTTACAAGCTTCCAGGACACTTGTTT,,A,C,informative,,SV40 large T antigen,construct,SV40,1,,11,3,0,0,0,,,
ZZSV400010,0,0,,AAAAATGAAGATGGTGGGGAGAAGAACATGGAAGACTCAGGGCATGAAAC,,A,C,informative,,SV40 large T antigen,construct,SV40,1,,11,3,0,0,0,,,
ZZSV400011,0,0,,TGCTGATAAAAATGAAGATGGTGGGGAGAAGAACATGGAAGACTCAGGGC,,A,C,informative,,SV40 large T antigen,construct,SV40,1,,11,3,0,0,0,,,
ZZSV400012,0,0,,GAAAATGCTGATAAAAATGAAGATGGTGGGGAGAAGAACATGGAAGACTC,,A,C,informative,,SV40 large T antigen,construct,SV40,1,,11,3,0,0,0,,,
ZZSV400014,0,0,,CAGTGATGATGATGATGAAGACAGCCAGGAAAATGCTGATAAAAATGAAG,,A,C,informative,,SV40 large T antigen,construct,SV40,1,,11,3,0,0,0,,,
ZZSV400015,0,0,,TCTTTCCACTCCACAATTCTGCTCTGAATACTTTGAGCAAACTCAGCCAC,,A,C,informative,,SV40 large T antigen,construct,SV40,1,,11,3,0,0,0,,,
ZZSV400016,0,0,,TCTTTGTCCAATCTCTCTTTCCACTCCACAATTCTGCTCTGAATACTTTG,,A,C,informative,,SV40 large T antigen,construct,SV40,1,,11,3,0,0,0,,,
ZZSV400017,0,0,,CATTTTTTGATACACTGACAAACTAAACTCTTTGTCCAATCTCTCTTTCC,,A,C,informative,,SV40 large T antigen,construct,SV40,1,,11,3,0,0,0,,,
ZZSV400018,0,0,,TAAAACTCCAATTCCCATAGCCACATTAAACTTCATTTTTTGATACACTG,,A,C,informative,,SV40 large T antigen,construct,SV40,1,,11,3,0,0,0,,,
ZZSV400019,0,0,,TCATCATCACTGTTTCTTAGCCAATCTAAAACTCCAATTCCCATAGCCAC,,A,C,informative,,SV40 large T antigen,construct,SV40,1,,11,3,0,0,0,,,
ZZtTA00001,0,0,,CCGTAAACTCGCCCAGAAGCTTGGTGTAGAGCAGCCTACACTGTATTGGC,,A,C,informative,,Tetracycline repressor protein,construct,tTA,1,,13,2.5,0,0,0,,,
ZZtTA00002,0,0,,GGTTTAACAACCCGTAAACTCGCCCAGAAGCTTGGTGTAGAGCAGCCTAC,,A,C,informative,,Tetracycline repressor protein,construct,tTA,1,,13,2.5,0,0,0,,,
ZZtTA00003,0,0,,GCTGCTTAATGAGGTCGGAATCGAAGGTTTAACAACCCGTAAACTCGCCC,,A,C,informative,,Tetracycline repressor protein,construct,tTA,1,,13,2.5,0,0,0,,,
ZZtTA00005,0,0,,GCTGCTCTACACCTAGCTTCTGGGCGAGTTTACGGGTTGTTAAACCTTCG,,A,C,informative,,Tetracycline repressor protein,construct,tTA,1,,13,2.5,0,0,0,,,
ZZtTA00008,0,0,,TCTAACATCTCAATGGCTAAGGCGTCGAGCAAAGCCCGCTTATTTTTTAC,,A,C,informative,,Tetracycline repressor protein,construct,tTA,1,,13,2.5,0,0,0,,,
ZZtTA00009,0,0,,TATCTAACATCTCAATGGCTAAGGCGTCGAGCAAAGCCCGCTTATTTTTT,,A,C,informative,,Tetracycline repressor protein,construct,tTA,1,,13,2.5,0,0,0,,,
ZZtTA00010,0,0,,AAGAGCATCAAGTCGCTAAAGAAGAAAGGGAAACACCTACTACTGATAGT,,A,C,informative,,Tetracycline repressor protein,construct,tTA,1,,13,2.5,0,0,0,,,
ZZtTA00011,0,0,,TGGAAGATCAAGAGCATCAAGTCGCTAAAGAAGAAAGGGAAACACCTACT,,A,C,informative,,Tetracycline repressor protein,construct,tTA,1,,13,2.5,0,0,0,,,
ZZtTA00012,0,0,,CAGCGCTGTGGGGCATTTTACTTTAGGTTGCGTATTGGAAGATCAAGAGC,,A,C,informative,,Tetracycline repressor protein,construct,tTA,1,,13,2.5,0,0,0,,,
ZZtTA00013,0,0,,AACGCGTTATATGCACTCAGCGCTGTGGGGCATTTTACTTTAGGTTGCGT,,A,C,informative,,Tetracycline repressor protein,construct,tTA,1,,13,2.5,0,0,0,,,
ZZtTA00014,0,0,,TAGGTGTTTCCCTTTCTTCTTTAGCGACTTGATGCTCTTGATCTTCCAAT,,A,C,informative,,Tetracycline repressor protein,construct,tTA,1,,13,2.5,0,0,0,,,
ZZtTA00015,0,0,,TCAAATAATTCGATAGCTTGTCGTAATAATGGCGGCATACTATCAGTAGT,,A,C,informative,,Tetracycline repressor protein,construct,tTA,1,,13,2.5,0,0,0,,,
ZZtTA00016,0,0,,AGGCCGAATAAGAAGGCTGGCTCTGCACCTTGGTGATCAAATAATTCGAT,,A,C,informative,,Tetracycline repressor protein,construct,tTA,1,,13,2.5,0,0,0,,,
ZZtTA00017,0,0,,CATATGATCAATTCAAGGCCGAATAAGAAGGCTGGCTCTGCACCTTGGTG,,A,C,informative,,Tetracycline repressor protein,construct,tTA,1,,13,2.5,0,0,0,,,
ZZAmpR0001,0,0,,CACGAGTGGGTTACATCGAACTGGATCTCAACAGCGGTAAGATCCTTGAG,,A,C,not tested,,,,,0,,,,0,0,0,,,
ZZAmpR0002,0,0,,AGTTGGGTGCACGAGTGGGTTACATCGAACTGGATCTCAACAGCGGTAAG,,A,C,not tested,,,,,0,,,,0,0,0,,,
ZZAmpR0004,0,0,,TGGTGAAAGTAAAAGATGCTGAAGATCAGTTGGGTGCACGAGTGGGTTAC,,A,C,not tested,,,,,0,,,,0,0,0,,,
ZZAmpR0005,0,0,,CCAGAAACGCTGGTGAAAGTAAAAGATGCTGAAGATCAGTTGGGTGCACG,,A,C,not tested,,,,,0,,,,0,0,0,,,
ZZAmpR0006,0,0,,TAAAAGTGCTCATCATTGGAAAACGTTCTTCGGGGCGAAAACTCTCAAGG,,A,C,not tested,,,,,0,,,,0,0,0,,,
ZZAmpR0007,0,0,,TTGGAAAACGTTCTTCGGGGCGAAAACTCTCAAGGATCTTACCGCTGTTG,,A,C,not tested,,,,,0,,,,0,0,0,,,
ZZAmpR0008,0,0,,CTTCGGGGCGAAAACTCTCAAGGATCTTACCGCTGTTGAGATCCAGTTCG,,A,C,not tested,,,,,0,,,,0,0,0,,,
ZZAmpR0009,0,0,,GAAAACTCTCAAGGATCTTACCGCTGTTGAGATCCAGTTCGATGTAACCC,,A,C,not tested,,,,,0,,,,0,0,0,,,
ZZAmpR0010,0,0,,TCAAGGATCTTACCGCTGTTGAGATCCAGTTCGATGTAACCCACTCGTGC,,A,C,not tested,,,,,0,,,,0,0,0,,,
ZZblastR04,0,0,,ATGTATATCATTTTACTGGGGGACCTTGTGCAGAACTCGTGGTGCTGGGC,,A,C,not informative,,,,,0,,,,0,0,0,,,
ZZblastR11,0,0,,ATGTATATCATTTTACTGGGGGACCTTGTGCAGAACTCGTGGTGCTGGGC,,A,C,not informative,,,,,0,,,,0,0,0,,,
ZZCAG00001,0,0,,CGACATTGATTATTGACTAGTTATTAATAGTAATCAATTACGGGGTCATT,,A,C,not informative,,,,,0,,,,0,0,0,,,
ZZCAG00004,0,0,,AATGACCCCGTAATTGATTACTATTAATAACTAGTCAATAATCAATGTCG,,A,C,not informative,,,,,0,,,,0,0,0,,,
ZZCE1O0001,0,0,+,TTCAAGAACTCTGTAGCACCGCCTACATACCTCGCTCTGCTAATCCTGTT,,A,C,not tested,,,,,0,,,,0,0,0,SPIKE,,
ZZCE1O0002,0,0,+,ACTGTCCTTCTAGTGTAGCCGTAGTTAGGCCACCACTTCAAGAACTCTGT,,A,C,not tested,,,,,0,,,,0,0,0,SPIKE,,
ZZCE1O0003,0,0,+,CCGAAGGTAACTGGCTTCAGCAGAGCGCAGATACCAAATACTGTCCTTCT,,A,C,not tested,,,,,0,,,,0,0,0,SPIKE,,
ZZCE1O0005,0,0,+,TTTTTTCTGCGCGTAATCTGCTGCTTGCAAACAAAAAAACCACCGCTACC,,A,C,not tested,,,,,0,,,,0,0,0,SPIKE,,
ZZCE1O0007,0,0,+,TGCGCTCTGCTGAAGCCAGTTACCTTCGGAAAAAGAGTTGGTAGCTCTTG,,A,C,not tested,,,,,0,,,,0,0,0,SPIKE,,
ZZCE1O0008,0,0,+,GCTACACTAGAAGGACAGTATTTGGTATCTGCGCTCTGCTGAAGCCAGTT,,A,C,not tested,,,,,0,,,,0,0,0,SPIKE,,
ZZCE1O0009,0,0,+,ACAGAGTTCTTGAAGTGGTGGCCTAACTACGGCTACACTAGAAGGACAGT,,A,C,not tested,,,,,0,,,,0,0,0,SPIKE,,
ZZchloR010,0,0,,TTCATCAGGCGGGCAAGAATGTGAATAAAGGCCGGATAAAACTTGTGCTT,,A,C,not tested,,,,,0,,,,0,0,0,,,
ZZcHS40020,0,0,,GAGCCTGCAGACACCTGGGGGGATACGGGGAAAAAGCTTTAGGCTGAAAG,,A,C,not tested,,,,,0,,,,0,0,0,,,
ZZcHS40021,0,0,,ATCTCTCTTTCAGCCTAAAGCTTTTTCCCCGTATCCCCCCAGGTGTCTGC,,A,C,not tested,,,,,0,,,,0,0,0,,,
ZZcHS40022,0,0,,CGTATCCCCCCAGGTGTCTGCAGGCTCAAAGAGCAGCGAGAAGCGTTCAG,,A,C,not tested,,,,,0,,,,0,0,0,,,
ZZcHS40024,0,0,,GAGCCTGCAGACACCTGGGGGGATACGGGGAAAAAGCTTTAGGCTGAAAG,,A,C,not tested,,,,,0,,,,0,0,0,,,
ZZcHS40025,0,0,,ATCTCTCTTTCAGCCTAAAGCTTTTTCCCCGTATCCCCCCAGGTGTCTGC,,A,C,not tested,,,,,0,,,,0,0,0,,,
ZZcHS40026,0,0,,GAGCCTGCAGACACCTGGGGGGATACGGGGAAAAAGCTTTAGGCTGAAAG,,A,C,not tested,,,,,0,,,,0,0,0,,,
ZZcHS40027,0,0,,ATCTCTCTTTCAGCCTAAAGCTTTTTCCCCGTATCCCCCCAGGTGTCTGC,,A,C,not tested,,,,,0,,,,0,0,0,,,
ZZcreERT02,0,0,,TCGCAAGAACCTGATGGACATGTTCAGGGATCGCCAGGCGTTTTCTGAGC,,A,C,not informative,,,,,0,,,,0,0,0,,,
ZZcreERT07,0,0,,TCGCAAGAACCTGATGGACATGTTCAGGGATCGCCAGGCGTTTTCTGAGC,,A,C,not informative,,,,,0,,,,0,0,0,,,
ZZEF100004,0,0,,CAGTACACGACATCACTTTCCCAGTTTACCCCGCGCCACCTTCTCTAGGC,,A,C,not tested,,,,,0,,,,0,0,0,,,
ZZEF100010,0,0,,AAAAAGGCGGAGCCAGTACACGACATCACTTTCCCAGTTTACCCCGCGCC,,A,C,not tested,,,,,0,,,,0,0,0,,,
ZZEF100012,0,0,,CAGTACACGACATCACTTTCCCAGTTTACCCCGCGCCACCTTCTCTAGGC,,A,C,not tested,,,,,0,,,,0,0,0,,,
ZZEF100013,0,0,,AAAAAGGCGGAGCCAGTACACGACATCACTTTCCCAGTTTACCCCGCGCC,,A,C,not tested,,,,,0,,,,0,0,0,,,
ZZEF100014,0,0,,CAGTACACGACATCACTTTCCCAGTTTACCCCGCGCCACCTTCTCTAGGC,,A,C,not tested,,,,,0,,,,0,0,0,,,
ZZEF100015,0,0,,AAAAAGGCGGAGCCAGTACACGACATCACTTTCCCAGTTTACCCCGCGCC,,A,C,not tested,,,,,0,,,,0,0,0,,,
ZZemcIRES8,0,0,,AGACGGCAATATGGTGGAAAATAACATATAGACAAACGCACACCGGCCTT,,A,C,not informative,,,,,0,,,,0,0,0,,,
ZZEYFP0016,0,0,,GACCATGTGATCGCGCTTCTCGTTGGGGTCTTTGCTCAGGGCGGACTGGT,,A,C,not informative,,,,,0,,,,0,0,0,,,
ZZF1O00001,0,0,+,GGCCTATTGGTTAAAAAATGAGCTGATTTAACAAAAATTTAACGCGAATT,,A,C,not tested,,,,,0,,,,0,0,0,SPIKE,,
ZZF1O00002,0,0,+,ATTTATAAGGGATTTTGCCGATTTCGGCCTATTGGTTAAAAAATGAGCTG,,A,C,not tested,,,,,0,,,,0,0,0,SPIKE,,
ZZF1O00003,0,0,+,AAAAACTTGATTAGGGTGATGGTTCACGTAGTGGGCCATCGCCCTGATAG,,A,C,not tested,,,,,0,,,,0,0,0,SPIKE,,
ZZF1O00004,0,0,+,AGCTCTAAATCGGGGGCTCCCTTTAGGGTTCCGATTTAGTGCTTTACGGC,,A,C,not tested,,,,,0,,,,0,0,0,SPIKE,,
ZZF1O00008,0,0,+,CGTAAAGCACTAAATCGGAACCCTAAAGGGAGCCCCCGATTTAGAGCTTG,,A,C,not tested,,,,,0,,,,0,0,0,SPIKE,,
ZZF1O00009,0,0,+,ACTATTAAAGAACGTGGACTCCAACGTCAAAGGGCGAAAAACCGTCTATC,,A,C,not tested,,,,,0,,,,0,0,0,SPIKE,,
ZZF1O00010,0,0,+,ATCCCTTATAAATCAAAAGAATAGACCGAGATAGGGTTGAGTGTTGTTCC,,A,C,not tested,,,,,0,,,,0,0,0,SPIKE,,
ZZfirluc03,0,0,,GATACCGGGAAAACGCTGGGCGTTAATCAAAGAGGCGAACTGTGTGTGAG,,A,C,not informative,,,,,0,,,,0,0,0,,,
ZZfirluc10,0,0,,AGACGCCAAAAACATAAAGAAAGGCCCGGCGCCATTCTATCCGCTGGAAG,,A,C,not informative,,,,,0,,,,0,0,0,,,
ZZFlp00002,0,0,+,TCAAGAGAGCCACATTCATGAGCTATAATACTATCATAAGCAATTCGCTG,,A,C,not tested,,,,,0,,,,0,0,0,SPIKE,,
ZZFlp00003,0,0,+,TGATATTGTAAGTAGTTTGCAATTACAGTTCGAATCATCGGAAGAAGCAG,,A,C,not tested,,,,,0,,,,0,0,0,SPIKE,,
ZZFlp00005,0,0,+,AGCATTGAAGGATGAGACTAATCCAATTGAGGAGTGGCAGCATATAGAAC,,A,C,not tested,,,,,0,,,,0,0,0,SPIKE,,
ZZFlp00006,0,0,+,GTATCGTATGCTTCCTTCAGCACTACCCTTTAGCTGTTCTATATGCTGCC,,A,C,not tested,,,,,0,,,,0,0,0,SPIKE,,
ZZFlp00007,0,0,+,CCTTCAGCACTACCCTTTAGCTGTTCTATATGCTGCCACTCCTCAATTGG,,A,C,not tested,,,,,0,,,,0,0,0,SPIKE,,
ZZFlp00008,0,0,+,CAGAAGCACGCTTATCGCTCCAATTTCCCACAACATTAGTCAACTCCGTT,,A,C,not tested,,,,,0,,,,0,0,0,SPIKE,,
ZZFlp00009,0,0,+,TTGCGCTAAAGAAGTATATGTGCCTACTAACGCTTGTCTTTGTCTCTGTC,,A,C,not tested,,,,,0,,,,0,0,0,SPIKE,,
ZZGLuc0001,0,0,+,GAAAATGGGAGTGAAAGTTCTTTTTGCCCTTATTTGTATTGCTGTGGCCG,,A,C,not informative,,,,,0,,,,0,0,0,SPIKE,,
ZZGLuc0002,0,0,+,CAACATTGTAGCTGTAGCTAGCAACTTTGCTACAACGGATCTCGATGCTG,,A,C,not informative,,,,,0,,,,0,0,0,SPIKE,,
ZZGLuc0003,0,0,+,ACATCAAGTGTACACCCAAAATGAAGAAGTTTATCCCAGGAAGATGCCAC,,A,C,not informative,,,,,0,,,,0,0,0,SPIKE,,
ZZGLuc0004,0,0,+,GTTCTGATTTACTCAAGAAATGGCTGCCACAAAGATGTGCAACTTTTGCT,,A,C,not informative,,,,,0,,,,0,0,0,SPIKE,,
ZZGLuc0007,0,0,+,CCAGGAATTTCAGGAATGTCAACAATAGCCTCTCCTATTCCTCCCTGTGC,,A,C,not informative,,,,,0,,,,0,0,0,SPIKE,,
ZZGLuc0008,0,0,+,TTTGGGTGTACACTTGATGTGTGACAGGCATATCAGACATCCCCTAGTGC,,A,C,not informative,,,,,0,,,,0,0,0,SPIKE,,
ZZGLuc0009,0,0,+,ATCCAGTTGTGCAGTCTACACATAGGTCAACTTGTGCAATGAATTGTTCC,,A,C,not informative,,,,,0,,,,0,0,0,SPIKE,,
ZZGLuc0010,0,0,+,ATCCCCTAGTGCAGCCAGCTTTCCTAGCATTGGCTTCCATTTCTTTGAGT,,A,C,not informative,,,,,0,,,,0,0,0,SPIKE,,
ZZhygro007,0,0,,GATATGCTGACGCTCAATGCCGTTTGGCCTCCGACTAACGAAAATCCCGC,,A,C,not tested,,,,,0,,,,0,0,0,,,
ZZhygro011,0,0,,TTTCGTTAGTCGGAGGCCAAACGGCATTGAGCGTCAGCATATCATCAGCG,,A,C,not tested,,,,,0,,,,0,0,0,,,
ZZhygro013,0,0,,TTCTTCAGCTCGCTGATGATATGCTGACGCTCAATGCCGTTTGGCCTCCG,,A,C,not tested,,,,,0,,,,0,0,0,,,
ZZhygro014,0,0,,CTGGGGCAACACGTGGAGCGGATCGGGGATTGTCTTTCTTCAGCTCGCTG,,A,C,not tested,,,,,0,,,,0,0,0,,,
ZZhygro015,0,0,,GGCATTGAGCGTCAGCATATCATCAGCGAGCTGAAGAAAGACAATCCCCG,,A,C,not tested,,,,,0,,,,0,0,0,,,
ZZhygro016,0,0,,GTTCAGGCTTTTTCATATCTCATTGCCCCCGGACGAGCGTCTGCTCCGCC,,A,C,not tested,,,,,0,,,,0,0,0,,,
ZZhygro017,0,0,,GATATGCTGACGCTCAATGCCGTTTGGCCTCCGACTAACGAAAATCCCGC,,A,C,not tested,,,,,0,,,,0,0,0,,,
ZZhygro018,0,0,,TTTCGTTAGTCGGAGGCCAAACGGCATTGAGCGTCAGCATATCATCAGCG,,A,C,not tested,,,,,0,,,,0,0,0,,,
ZZhygro019,0,0,,TTCTTCAGCTCGCTGATGATATGCTGACGCTCAATGCCGTTTGGCCTCCG,,A,C,not tested,,,,,0,,,,0,0,0,,,
ZZhygro020,0,0,,GGCATTGAGCGTCAGCATATCATCAGCGAGCTGAAGAAAGACAATCCCCG,,A,C,not tested,,,,,0,,,,0,0,0,,,
ZZicre0012,0,0,,CTCCAATGCTGTGTCCCTGGTGATGAGGAGAATCAGAAAGGAGAATGTGG,,A,C,not informative,,,,,0,,,,0,0,0,,,
ZZicre0015,0,0,,GGTACAGGAGGTAGTCCCTCACATCCTCAGGTTCAGCAGGGAACCATTTC,,A,C,not informative,,,,,0,,,,0,0,0,,,
ZZicre0022,0,0,,GGGACACAGCATTGGAGTCAGAAGGGCGAGGCAGGCCAGATCTCCTGTGC,,A,C,not informative,,,,,0,,,,0,0,0,,,
ZZKanR0001,0,0,+,CGGTATCGCCGCTCCCGATTCGCAGCGCATCGCCTTCTATCGCCTTCTTG,,A,C,not tested,,,,,0,,,,0,0,0,SPIKE,,
ZZKanR0004,0,0,+,CTACCTGCCCATTCGACCACCAAGCGAAACATCGCATCGAGCGAGCACGT,,A,C,not tested,,,,,0,,,,0,0,0,SPIKE,,
ZZKanR0005,0,0,+,TCTTTTTGTCAAGACCGACCTGTCCGGTGCCCTGAATGAACTCCAAGACG,,A,C,not tested,,,,,0,,,,0,0,0,SPIKE,,
ZZKanR0006,0,0,+,CCGGAACACGGCGGCATCAGAGCAGCCGATTGTCTGTTGTGCCCAGTCAT,,A,C,not tested,,,,,0,,,,0,0,0,SPIKE,,
ZZKanR0008,0,0,+,GAGCAAGGTGAGATGACAGGAGATCCTGCCCCGGCACTTCGCCCAATAGC,,A,C,not tested,,,,,0,,,,0,0,0,SPIKE,,
ZZKanR0010,0,0,+,GCCGCCAAGCTCTTCAGCAATATCACGGGTAGCCAACGCTATGTCCTGAT,,A,C,not tested,,,,,0,,,,0,0,0,SPIKE,,
ZZlacZ0003,0,0,,TAATCGCCTTGCAGCACATCCCCCTTTCGCCAGCTGGCGTAATAGCGAAG,,A,C,not tested,,,,,0,,,,0,0,0,,,
ZZlacZ0004,0,0,,TCGTGACTGGGAAAACCCTGGCGTTACCCAACTTAATCGCCTTGCAGCAC,,A,C,not tested,,,,,0,,,,0,0,0,,,
ZZlacZ0007,0,0,,TGTGCTGCAAGGCGATTAAGTTGGGTAACGCCAGGGTTTTCCCAGTCACG,,A,C,not tested,,,,,0,,,,0,0,0,,,
ZZlacZ0008,0,0,,GTTGGGTAACGCCAGGGTTTTCCCAGTCACGACGTTGTAAAACGACGGCC,,A,C,not tested,,,,,0,,,,0,0,0,,,
ZZlacZ0010,0,0,,ACCCTGGCGTTACCCAACTTAATCGCCTTGCAGCACATCCCCCTTTCGCC,,A,C,not tested,,,,,0,,,,0,0,0,,,
ZZlacZ0011,0,0,,AGGCTGCGCAACTGTTGGGAAGGGCGATCGGTGCGGGCCTCTTCGCTATT,,A,C,not tested,,,,,0,,,,0,0,0,,,
ZZlacZ0012,0,0,,CAGCTGGCGAAAGGGGGATGTGCTGCAAGGCGATTAAGTTGGGTAACGCC,,A,C,not tested,,,,,0,,,,0,0,0,,,
ZZlacZ0013,0,0,,TAATCGCCTTGCAGCACATCCCCCTTTCGCCAGCTGGCGTAATAGCGAAG,,A,C,not tested,,,,,0,,,,0,0,0,,,
ZZlacZ0014,0,0,,TCGTGACTGGGAAAACCCTGGCGTTACCCAACTTAATCGCCTTGCAGCAC,,A,C,not tested,,,,,0,,,,0,0,0,,,
ZZlacZ0015,0,0,,TGTGCTGCAAGGCGATTAAGTTGGGTAACGCCAGGGTTTTCCCAGTCACG,,A,C,not tested,,,,,0,,,,0,0,0,,,
ZZlacZ0016,0,0,,GTTGGGTAACGCCAGGGTTTTCCCAGTCACGACGTTGTAAAACGACGGCC,,A,C,not tested,,,,,0,,,,0,0,0,,,
ZZluci0001,0,0,,CCCTGGTTCCTGGAACAATTGCTTTTACAGATGCACATATCGAGGTGGAC,,A,C,not informative,,,,,0,,,,0,0,0,,,
ZZluci0002,0,0,,CGCCCTGGTTCCTGGAACAATTGCTTTTACAGATGCACATATCGAGGTGG,,A,C,not informative,,,,,0,,,,0,0,0,,,
ZZluci0004,0,0,,TGAAGAGATACGCCCTGGTTCCTGGAACAATTGCTTTTACAGATGCACAT,,A,C,not informative,,,,,0,,,,0,0,0,,,
ZZluci0005,0,0,,TGATGTCCACCTCGATATGTGCATCTGTAAAAGCAATTGTTCCAGGAACC,,A,C,not informative,,,,,0,,,,0,0,0,,,
ZZluci0006,0,0,,GCGTAAGTGATGTCCACCTCGATATGTGCATCTGTAAAAGCAATTGTTCC,,A,C,not informative,,,,,0,,,,0,0,0,,,
ZZmcherr11,0,0,,CGAGGAGGATAACATGGCCATCATCAAGGAGTTCATGCGCTTCAAGGTGC,,A,C,not informative,,,,,0,,,,0,0,0,,,
ZZmcherr14,0,0,,CGAGGAGGATAACATGGCCATCATCAAGGAGTTCATGCGCTTCAAGGTGC,,A,C,not informative,,,,,0,,,,0,0,0,,,
ZZmcherr15,0,0,,AGCGCATGAACTCCTTGATGATGGCCATGTTATCCTCCTCGCCCTTGCTC,,A,C,not informative,,,,,0,,,,0,0,0,,,
ZZmcherr16,0,0,,CCCTCCATGTGCACCTTGAAGCGCATGAACTCCTTGATGATGGCCATGTT,,A,C,not informative,,,,,0,,,,0,0,0,,,
ZZmcherr17,0,0,,CGTTCACGGAGCCCTCCATGTGCACCTTGAAGCGCATGAACTCCTTGATG,,A,C,not informative,,,,,0,,,,0,0,0,,,
ZZmcherry4,0,0,,AGCGCATGAACTCCTTGATGATGGCCATGTTATCCTCCTCGCCCTTGCTC,,A,C,not informative,,,,,0,,,,0,0,0,,,
ZZmcherry5,0,0,,CCCTCCATGTGCACCTTGAAGCGCATGAACTCCTTGATGATGGCCATGTT,,A,C,not informative,,,,,0,,,,0,0,0,,,
ZZmcherry7,0,0,,CGTTCACGGAGCCCTCCATGTGCACCTTGAAGCGCATGAACTCCTTGATG,,A,C,not informative,,,,,0,,,,0,0,0,,,
ZZneo00005,0,0,,CAGAGCAGCCGATTGTCTGTTGTGCCCAGTCATAGCCGAATAGCCTCTCC,,A,C,not tested,,,,,0,,,,0,0,0,,,
ZZneo00006,0,0,,CCCGGTTCTTTTTGTCAAGACCGACCTGTCCGGTGCCCTGAATGAACTGC,,A,C,not tested,,,,,0,,,,0,0,0,,,
ZZneo00011,0,0,,TCTTTTTGTCAAGACCGACCTGTCCGGTGCCCTGAATGAACTGCAGGACG,,A,C,not tested,,,,,0,,,,0,0,0,,,
ZZneo00012,0,0,,CGGCGGCATCAGAGCAGCCGATTGTCTGTTGTGCCCAGTCATAGCCGAAT,,A,C,not tested,,,,,0,,,,0,0,0,,,
ZZneo00013,0,0,,CCGGAACACGGCGGCATCAGAGCAGCCGATTGTCTGTTGTGCCCAGTCAT,,A,C,not tested,,,,,0,,,,0,0,0,,,
ZZneo00014,0,0,,AGCCGGAACACGGCGGCATCAGAGCAGCCGATTGTCTGTTGTGCCCAGTC,,A,C,not tested,,,,,0,,,,0,0,0,,,
ZZneo00015,0,0,,TGACAGCCGGAACACGGCGGCATCAGAGCAGCCGATTGTCTGTTGTGCCC,,A,C,not tested,,,,,0,,,,0,0,0,,,
ZZneo00016,0,0,,CAGAGCAGCCGATTGTCTGTTGTGCCCAGTCATAGCCGAATAGCCTCTCC,,A,C,not tested,,,,,0,,,,0,0,0,,,
ZZneo00017,0,0,,CCCGGTTCTTTTTGTCAAGACCGACCTGTCCGGTGCCCTGAATGAACTGC,,A,C,not tested,,,,,0,,,,0,0,0,,,
ZZneo00018,0,0,,TCTTTTTGTCAAGACCGACCTGTCCGGTGCCCTGAATGAACTGCAGGACG,,A,C,not tested,,,,,0,,,,0,0,0,,,
ZZneoR0001,0,0,,TATCGCCGCTCCCGATTCGCAGCGCATCGCCTTCTATCGCCTTCTTGACG,,A,C,not tested,,,,,0,,,,0,0,0,,,
ZZneoR0002,0,0,,ATGGGCTGACCGCTTCCTCGTGCTTTACGGTATCGCCGCTCCCGATTCGC,,A,C,not tested,,,,,0,,,,0,0,0,,,
ZZneoR0003,0,0,,GGCGGACCGCTATCAGGACATAGCGTTGGCTACCCGTGATATTGCTGAAG,,A,C,not tested,,,,,0,,,,0,0,0,,,
ZZneoR0005,0,0,,ACGGCGAGGATCTCGTCGTGACCCATGGCGATGCCTGCTTGCCGAATATC,,A,C,not tested,,,,,0,,,,0,0,0,,,
ZZneoR0006,0,0,,GGCGATGCCTGCTTGCCGAATATCATGGTGGAAAATGGCCGCTTTTCTGG,,A,C,not tested,,,,,0,,,,0,0,0,,,
ZZneoR0008,0,0,,ACAACAGACAATCGGCTGCTCTGATGCCGCCGTGTTCCGGCTGTCAGCGC,,A,C,not tested,,,,,0,,,,0,0,0,,,
ZZneoR0009,0,0,,CTCCGGCCGCTTGGGTGGAGAGGCTATTCGGCTATGACTGGGCACAACAG,,A,C,not tested,,,,,0,,,,0,0,0,,,
ZZneoR0011,0,0,,GGCGGACCGCTATCAGGACATAGCGTTGGCTACCCGTGATATTGCTGAAG,,A,C,not tested,,,,,0,,,,0,0,0,,,
ZZneoR0012,0,0,,GGCGATGCCTGCTTGCCGAATATCATGGTGGAAAATGGCCGCTTTTCTGG,,A,C,not tested,,,,,0,,,,0,0,0,,,
ZZPU000001,0,0,+,GTCGGGTTTCGCCACCTCTGACTTGAGCGTCGATTTTTGTGATGCTCGTC,,A,C,not tested,,,,,0,,,,0,0,0,SPIKE,,
ZZPU000003,0,0,+,AGCTTGGAGCGAACGACCTACACCGAACTGAGATACCTACAGCGTGAGCT,,A,C,not tested,,,,,0,,,,0,0,0,SPIKE,,
ZZPU000004,0,0,+,GTAGCCGTAGTTAGGCCACCACTTCAAGAACTCTGTAGCACCGCCTACAT,,A,C,not tested,,,,,0,,,,0,0,0,SPIKE,,
ZZPU000006,0,0,+,GCAAACAAACCACCGCTGGTAGCGGTGGTTTTTTTGTTTGCAAGCAGCAG,,A,C,not tested,,,,,0,,,,0,0,0,SPIKE,,
ZZPU000007,0,0,+,TCGGAAAAAGAGTTGGTAGCTCTTGATCCGGCAAACAAACCACCGCTGGT,,A,C,not tested,,,,,0,,,,0,0,0,SPIKE,,
ZZPU000008,0,0,+,TCTTGAAGTGGTGGCCTAACTACGGCTACACTAGAAGAACAGTATTTGGT,,A,C,not tested,,,,,0,,,,0,0,0,SPIKE,,
ZZPU000010,0,0,+,TAGGTATCTCAGTTCGGTGTAGGTCGTTCGCTCCAAGCTGGGCTGTGTGC,,A,C,not tested,,,,,0,,,,0,0,0,SPIKE,,
ZZTetO0001,0,0,,GCCATCCAGTTTACTTTGCAGGGCTTCCCAACCTTACCAGAGGGCGCCCC,,A,C,not tested,,,,,0,,,,0,0,0,,,
ZZTetO0002,0,0,,CGGCAAGAAAGCCATCCAGTTTACTTTGCAGGGCTTCCCAACCTTACCAG,,A,C,not tested,,,,,0,,,,0,0,0,,,
ZZTetO0003,0,0,,CTTGGCGGCAAGAAAGCCATCCAGTTTACTTTGCAGGGCTTCCCAACCTT,,A,C,not tested,,,,,0,,,,0,0,0,,,
ZZTetO0004,0,0,,CCTGCGCCATCAGATCCTTGGCGGCAAGAAAGCCATCCAGTTTACTTTGC,,A,C,not tested,,,,,0,,,,0,0,0,,,
ZZTetO0005,0,0,,TTGATCCCCTGCGCCATCAGATCCTTGGCGGCAAGAAAGCCATCCAGTTT,,A,C,not tested,,,,,0,,,,0,0,0,,,
ZZTetO0006,0,0,,GGGAAGCCCTGCAAAGTAAACTGGATGGCTTTCTTGCCGCCAAGGATCTG,,A,C,not tested,,,,,0,,,,0,0,0,,,
ZZTetO0007,0,0,,CAGCTGGGGCGCCCTCTGGTAAGGTTGGGAAGCCCTGCAAAGTAAACTGG,,A,C,not tested,,,,,0,,,,0,0,0,,,
ZZTetO0009,0,0,,GCTTGCAGTGGGCTTACATGGCGATAGCTAGACTGGGCGGTTTTATGGAC,,A,C,not tested,,,,,0,,,,0,0,0,,,
ZZTetO0010,0,0,,CGCAAAGAGAAAGCAGGTAGCTTGCAGTGGGCTTACATGGCGATAGCTAG,,A,C,not tested,,,,,0,,,,0,0,0,,,
ZZTK000010,0,0,,CCAAAGAGGTGCGGGAGTTTCACGCCACCAAGATCTGCGGCACGCTGTTG,,A,C,not informative,,,,,0,,,,0,0,0,,,
ZZtTA00006,0,0,,ACATGCCAATACAATGTAGGCTGCTCTACACCTAGCTTCTGGGCGAGTTT,,A,C,not informative,,,,,0,,,,0,0,0,,,
ZZtTA00007,0,0,,AAGCCCGCTTATTTTTTACATGCCAATACAATGTAGGCTGCTCTACACCT,,A,C,not informative,,,,,0,,,,0,0,0,,,
S3J010123784,1,3094603,+,ATAAATTCTACAGCCACAGAAGTCACATTTTAGCACTGCTGTGTTTCCAG,,C,A,1,rs51364903,C3H/HeJ,substrain,C3H/HeJ,0,A,,,1,0,0,,,
SAH010136363,1,3409090,-,CCACCTTTGTACTCTGTATGCTACACAGAAGCTATGAGTATTCTTTTCCC,,C,A,1,rs51478493,,,,0,,,,1,0,0,,,
S2H010137098,1,3427467,-,ATTGAAAATGATCTAAGGGAGTCATGAGTACAAGGAGAAATGGGCATATT,,A,G,1,rs36775618,,,,0,,,,1,0,0,,,
UNCHS000006,1,3439034,+,AATTTCTACCAGATCTCTTTGTCCTCCTAGAAGCATTGTGATACTCAGGA,,C,T,1,rs32691635,,,,0,,,,1,0,0,,,
mUNC010515443,1,3668628,-,CAGGAAATGATGCTGAGAAAGTGAGAAGTAGGAAAACGTGGAGAAAAATA,,G,A,1,rs30591321,,,,0,,,,1,0,0,,,
S2J010178507,1,4462692,-,GACCTATGGTTAAAAGTCAGGCATTTCTTGTGTCTTCTTGTATTATTGGT,,G,A,1,rs30593217,DBA/2J,substrain,DBA/2J,0,A,,,1,0,0,,Consensus,Consensus
gUNCHS000018,1,4504223,+,AAGAACACACCACACACCATAGATAAATATTAAATAAAGAAGAACACAGA,,G,A,1,rs231202172,,,,0,,,,1,0,0,,,
S1H010189775,1,4744395,-,TGTGGACCTGTAGCCATCCAATGTCCATGAGATGATAAGTCCAAGGACCA,,T,G,1,rs46252828,,,,0,,,,1,0,0,,,
S3N010202785,1,5069641,+,AATTAATAGCAATAGCTAAAGAAACTAAGTATGTAGGTTTTCTGCTTTTT,,A,G,1,rs31942640,,,,0,,,,1,0,0,,,
SAJ010205966,1,5149169,-,CCCTGAGCTCATAACCAACTGGAAGTACTATTATTCTGGCCTGAAAGCAG,,G,T,1,rs32037154,,,,0,,,,1,0,0,,,
gUNC24700,1,5224578,+,TCTCTCTGTCTCTGTCTCCCCCCCCCTCCCTCCACCGACAAAGTTTCACT,,G,A,4,rs52209865,,,,0,,,,1,0,0,,,
gUNC28841,1,5944792,+,AGGTTGGGACAGCTTAGTTCTGCCAAGACAAAATAGGCTAGTCCTAAATA,,T,C,1,rs31972222,,,,0,,,,1,0,0,,,
gUNC30322,1,6063698,-,CCTCAATGACATTTCCAATGCTAACTATCTTTAACAGAGCAAAATTTTGA,,A,C,1,rs48972085,,,,0,,,,1,0,0,,,
B10010006645,1,6645188,-,TGCAGGCAAGCTCTATTCTTGAAGGGAAAGTGCCCAGATATCTGATGTTC,,C,T,2,rs578816912,,,,0,,,,1,0,0,,,
gUNCHS000043,1,6669269,+,TCCCAGGATCTCAGAATCCCAGAAGCTTGGTCACACCAGTATCTCAGGGT,,T,C,3,rs224721244,,,,0,,,,1,0,0,,,
gJAX00000353,1,7698048,+,AGTGAAATGGGTTAGTAGTTACAGTGGACATGGGATACCTTATCACAGCT,,G,A,1,rs38627240,,,,0,,,,1,0,0,,,
SNT010330009,1,8250238,+,TCCAGGACACAACGAGAAGACCGAACCTACGGATAATAGGAGTGGATGAG,,G,A,3,,,,,0,,,,1,0,0,,,
mUNC010010509,1,8277576,-,CAATCTAACACTAAGAGAAGACACCAAAACTTTCTATTTGTGTAGGCTTT,,G,A,1,rs249332833,,,,0,,,,1,0,0,,,
gUNC66010,1,8554130,-,AGTATATTTTTAATTAAACCACTTTATTTGTTTGTGTTCCCAATTGTTGC,,G,T,1,rs32265991,,,,0,,,,1,0,0,,,
S6J010381992,1,9549819,+,GTTATCCTGGGTTTGGGTTTTGTTGCTTTCTCTTCTACACTCTACCATCT,,T,C,1,rs30849892,C57BL/6J,substrain,C57BL/6J,0,T,,,1,0,0,,E2,E3
mbackupJAX00000484,1,9553973,-,TCTAACTGACCCAAACTGTCTGTCTGTGCAATGGTGAAGGTCAGAATTTT,,A,G,1,rs32104829,,,,0,,,,1,0,0,,,
gUNC83675,1,9843988,-,TGCTAACTGAAAACATCTTTGCTTCCTAATCAGATAAAACATTAGTTATA,,C,T,1,rs31362910,,,,0,,,,1,0,0,,,
gJAX00241755,1,10325610,+,GTAGTTCCCACAGCATTTATCTTCATCCTTACTCTGCTCGCTTTACCCAC,,C,T,1,rs45771714,,,,0,,,,1,0,0,,,
S6Y010430291,1,10757298,+,ACATACCACTTTTGCATGCATTCTTTGATTACCTCATCCACAGCAGCCTC,,C,T,1,rs47535690,,,,0,,,,1,0,0,,,
gUNC98241,1,11068783,-,CACTAATCACAACACCTAAGAGGTATATTAGGCAGAGGGGTTACAAATTT,,C,A,1,rs31919978,,,,0,,,,1,0,0,,,
S2R010469462,1,11736567,-,GCTGGGAAGAAGCTATGAACTTACAGCTTGAGACACAACAATGACACAGA,,T,C,1,rs31400476,,,,0,,,,1,0,0,,,
gUNC114802,1,11954630,+,GCCTTTCTTATTAAAATTCACTGGGCCCTATCCTAGGTAAATGTAAGATC,,A,G,1,rs36573621,,,,0,,,,1,0,0,,,
gUNC120225,1,12397782,+,AGAAGAGTGATTTGAATTAAATGGGCAGGAAGTTCCATTACAAATTCATT,,T,C,1,rs50503933,,,,0,,,,1,0,0,,,
S3R010508538,1,12713462,-,AGAGCGGAAGTAATCTGTCAGGAGAAATTATTTAGACTGATGTGAATTAA,,G,A,2,,C3H/HeNRj,substrain,C3H/HeNRj,0,A,,,1,0,0,,,
mJAX00242215,1,12994801,-,CACCCTGTATTTTAGGTAGAAAGAGAATCATAAGATGTCCAGAAGGGTCT,,T,C,1,rs30477285,,,,0,,,,1,0,0,,,
B10010013203,1,13203373,+,TTGACAGTTTGCAAGTAAGAAGCCTCTCTGGAAATGCTGCTACCATGTGA,,T,C,4,rs32086439,,,,0,,,,1,0,0,,,
gUNC132724,1,13381025,-,GAGGATCTCTGTGAGTTCAAGGCCAGCCTGTTCTACAGAGTTCCAGGACA,,C,T,3,rs52494787,,,,0,,,,1,0,0,,,
S2R010540133,1,13503326,-,TCTGGCTTTCCCTGGTGTTGGCTGATGATTCTGATGGCTGCAGGACTTCC,,G,A,1,rs107737834,,,,0,,,,1,0,0,,,
SFJ010541296,1,13532405,+,TTGGGTGTGGGTCCTTTGAAGATTGCTAAGTTTCTCCTCTTTCTCTTTCG,,C,A,1,rs47114153,FVB/NJ,substrain,FVB/NJ,0,A,,,1,0,0,,,
gUNC137674,1,13738223,+,AATCCTCTTCGCATTCTACATCAGCTTTCTCATTGCATTCAACTGCTGGG,,C,T,1,rs49609390,,,,0,,,,1,0,0,,,
gUNC145909,1,14334166,-,CGACTGAACGCGTGGTGATACCATATAAAAAACTGGGACAGCTAGAAACC,,G,A,1,rs31338443,,,,0,,,,1,0,0,,,
gUNC149968,1,14622203,+,AATCTGGATTCCTTACTCCTCTTTCAACCAGAAATACATTGGTCTTGTCC,,T,C,1,rs51069151,,,,0,,,,1,0,0,,,
S3N010598436,1,14960904,+,CCATAAGAGACAGAGAACAGAAAATCTGCCATAAGGAAATGACATGCTAG,,C,T,1,,C3H/HeNHsd,substrain,C3H/HeNHsd,0,T,,,1,0,0,,,
gUNC164396,1,15558147,+,CTGTTTGTTGGAAAGATTGTTCTTTCCCCCAATTGAACTGTCTTAGTTTC,,T,C,1,rs46228975,,,,0,,,,1,0,0,,,
mUNC171301,1,16019662,-,TCCCTTCTTCAGTCAGCCGATCATAGGGAACACCTCATGAGGCTATAGGC,,C,T,4,rs47767898,,,,0,,,,1,0,0,,,
gUNCHS000159,1,16342189,+,AATCTACTTCAGCTCAAACACCCAGGGTTCCAACTATCTTTGCCACAGTT,,T,C,1,rs49165804,,,,0,,,,1,0,0,,,
mJAX00243111,1,17316310,-,TAACTAGGAAAGCCAATCTCCTACCCAGAGAGAACTTTTGACTGTGAAGA,,A,C,1,rs32173849,,,,0,,,,1,0,0,,,
gJAX00001099,1,17753014,+,TCAGTTCAAGCTGTGACCTGTGAAACTACAGTGGAACAGCTCTGTCCATT,,C,T,1,rs13464640,,,,0,,,,1,0,0,,,
gUNC197893,1,18007392,-,AATTCATGAATCCTCTGTCTGGACTCCTCAAGTCCTGGGATTAGAGATGT,,C,T,1,rs224487318,,,,0,,,,1,0,0,,,
SS1010732397,1,18309936,-,TTGAAATTGGAAATTGTTTTAACATGCTAGAAGCCAAAAGCTCTTATGAC,,A,C,1,rs214746439,129S1/SvImJ,substrain,129S1/SvImJ,0,C,,,1,0,0,,CC,CC
gUNC207853,1,18616479,-,ATAGGATAGCTGAATGTAAGAATACAGACATCAATATCTCTGCTTTGGTT,,G,A,1,rs49656876,,,,0,,,,1,0,0,,,
SSH010754626,1,18865665,-,ATTTTAGACTATAGGTAACTATAAGTAAATGAAATAGCAGAGATCAAAAC,,C,T,1,rs48697600,,,,0,,,,1,0,0,,,
DP3010764949,1,19123727,+,TCAGTTAGACAATTGGAACCAGAATGGCACAAGAGTACCTAAGGAAGATT,,A,G,2,,129P3/J,substrain,129P3/J,0,G,,,1,0,0,SPIKE,,
B10010019233,1,19233312,+,GACAACCATCCTGTTACACAAAGATTTTTATTAGCTCACATATGCAAAAA,GACAACCATCCTGTTACACAAAGATTTTTATTAGCTCACATATGCAAAAT,A,T,1,,C57BL/10,strain group,"C57BL/10ScCr, C57BL/10ScNHsd",0,T,,,1,0,0,,,
gUNC216547,1,19328374,-,CACATATGCATATATGCATACCCATGTGCACATACATGCACACACACAAA,,A,C,1,rs261872704,,,,0,,,,1,0,0,,,
mJAX00243648,1,20150250,-,AGAACTGCTCCTTATTTAAAGAAGGTACTCAGGCCACTAGGTCAGTAGGG,,G,A,1,rs50869743,,,,0,,,,1,0,0,,,
gUNC235488,1,20640694,+,CGTACTTGTCTCACAGCCTCCAGGATCTCATCACAACATGCCCCAACCAA,,G,A,1,rs32609090,,,,0,,,,1,0,0,,,
SAJ010827162,1,20679054,+,GCTTCCCCAGGCCACATGCTTCTTTATATCCTCATAGATATCTCAGCACT,,A,G,1,rs30603082,A,strain group,"A/J, A/JCr",0,G,,,1,0,0,,,
DS6010831461,1,20786525,-,CCAGAGTATCTAGTGCACACCATGGTTCGTTACATAATGTCTGAGTGTCA,CCAGAGTATCTAGTGCACACCATGGTTCGTTACATAATGTCTGAGTGTCT,A,T,1,,129S6/SvEvTac,substrain,129S6/SvEvTac,0,T,,,1,0,0,SPIKE,,
DS4010834916,1,20872918,+,GAACCGCATGCTGCGTCCCTGGTTTCTTGTTTGTTTCTCAGACAACTTAA,,G,A,2,,129S4/SvJaeJ,substrain,129S4/SvJaeJ,0,A,,,1,0,0,SPIKE,,
ST2010841024,1,21025609,+,GGATATGGACTTGAAAAAAATTACAGTGAACAAAATCACAGGGCAAATGG,,A,G,1,rs31774028,,,,0,,,,1,0,0,,,
mUNC010046230,1,21404140,-,AGAGCAAAGGTTCTAAAAAAAAGAAAAAGAAAGAAACTTTTATCTTAGCC,,C,T,1,rs263099401,,,,0,,,,1,0,0,,,
SFR010865397,1,21634933,-,TCTGTGAAAAGGCAGCAAATATTCTTTCCATCATCTATCATCAGTAGCAA,,A,G,2,,FVB/NRj,substrain,FVB/NRj,0,G,,,1,0,0,,,
B10010021636,1,21636124,+,CGTAACAATGGGAAAACCCCATTGGATGAGTAGATTTCTAAGACTTTTAA,,A,G,1,rs32074266,,,,0,,,,1,0,0,,,
SS1010876449,1,21911249,-,ACTCCAACAAGGCCACACAACCTAATGATGCCACCCCTTATGGGCCTACC,,C,T,1,rs253728621,129S1/SvImJ,substrain,129S1/SvImJ,0,T,,,1,0,0,,CC,CC
gUNC258775,1,22050242,-,CATTCTGACCATGAGGAGACATAGTTATCAAAATACAACTGCAGGTTTTT,,A,G,1,rs50202913,,,,0,,,,1,0,0,,,
ST2010894972,1,22374308,+,TTTATTGTCCTATTGGAGTGGGCCATACAGTGAATATACAATGCCATCAC,TTTATTGTCCTATTGGAGTGGGCCATACAGTGAATATACAATGCCATCAG,C,G,1,rs36396306,,,,0,,,,1,0,0,,,
SBH010911793,1,22794837,+,CCAAGTCAAGAACATAACAGACCATCCAAAAAATCATATTTTAATTTAAC,,G,T,1,,BALB/cAnNHsd,substrain,BALB/cAnNHsd,0,T,,,1,0,0,,,
B10010023005,1,23005029,+,TGGGGCAGAAGTCAGCAAAGTAAGCCTACTGGTCAAATCTGTGCAGCAGT,,C,T,1,,C57BL/10,strain group,"C57BL/10ScSnJ, C57BL/10SnJ",0,T,,,1,0,0,,,
DAC022207110,1,23099519,+,CACATGCTGGTTTTTTAACCATAGAAGGGGACCTGAGTGACATTGACGCT,,G,A,1,,A/JCr,substrain,A/JCr,0,A,,,1,0,0,SPIKE,,
gUNCHS000248,1,23112999,+,ATAAACCCTTTCCCCCACCCCACCCTCTGCTGCCCTAAGTTGCTTTTGGC,,T,C,1,rs227366706,,,,0,,,,1,0,0,,,
mUNC282212,1,23711831,-,CCTGCTGTCTATGTACCAGGCTACCATGTCCAAATCTAACATTTTCAATG,,G,A,1,rs30813990,,,,0,,,,1,0,0,,,
mbackupUNC010532073,1,24004775,-,CAAACCCGTGTACAAATGTGATAGACCTTTTCCATTAAGTGCCTGTATGA,,C,A,1,rs37253589,,,,0,,,,1,0,0,,,
DFC010971977,1,24299436,-,CCTAGTCTTACTGTCCTACAGACTTTTAAAATAGGACCGCCTCTGAGTCA,,G,T,1,,FVB/NCrl,substrain,FVB/NCrl,0,T,,,1,0,0,SPIKE,,
gUNC297129,1,24608489,-,TCCACTGTAGATTTGTGTTTGGTGCCCTGACACTACTGAACTGGACTTCT,,C,T,4,rs225700875,,,,0,,,,1,0,0,,,
S3J010984363,1,24609089,-,CTATAGAACTCTTTTTTGATTTGTCTTGTAATTCATATATGTTTTACTCC,,A,G,1,rs244716646,C3H/HeJ,substrain,"C3H/HeJ, C3H/HeOuJ",0,G,,,1,0,0,,,
D6Y010997455,1,24936396,-,CATACCTAGTACATGTGGTACTACACAGTCTTTGCTCTTCTGCTTAGCCA,,G,A,1,,B6N-Tyr<c-Brd>/BrdCrCrl,substrain,"B6N-Tyr<c-Brd>/BrdCrCrl, C57BL/6NCrl",0,A,,,1,0,0,SPIKE,,
mJAX00001692,1,25697943,-,GGATTTAAAGCACAAGATCCAAAAACAAATGCCTTTGGACACATGGAAAA,,A,G,1,rs31553678,,,,0,,,,1,0,0,,,
gICR4001,1,26502197,-,TAAAAGCAGTTATTAATAGTCTCCCAGGCAAAAAATGCCCAGGACCAGAC,,A,G,3,rs580331312,,,,0,,,,1,0,0,,,
gUNC339202,1,27569004,-,ATTCTCAATGTCTTTTTAATAAAATTGTCCTTGAAGAATACACAGGAATG,,C,T,1,rs47757731,,,,0,,,,1,0,0,,,
gUNCHS000309,1,27722959,+,ACTTTTCAAAGGCAATTTTTAAGTGGTACTCAATAGAAATGCAAAATGTT,,C,T,1,rs30746983,,,,0,,,,1,0,0,,,
mUNC010054938,1,28610405,+,GACAAGATACTATTGATCTCTGAATATCTTCTCTCAGGTTCCCTTTTAAT,,A,C,1,rs32603687,,,,0,,,,1,0,0,,,
UNCHS000333,1,29230010,+,ATCCTATGACCTCCATAGACCCTCAGTGTTCCACCTTCATAACTGTACTC,,A,C,1,rs32051275,,,,0,,,,1,0,0,,,
mJAX00001960,1,29263597,+,ACCTATAGCTCTGGTGAAAGATTGTGCTTGGTTGCTTTGATTTGGGACCC,,A,G,1,rs32235386,,,,0,,,,1,0,0,,,
SS1011172192,1,29304811,+,TGAGGCTGGAGACTGGATATCTGAAGTGAGATAGTATCTTCTATGCCCAC,,G,A,1,rs580578981,,,,0,,,,1,0,0,,,
gUNCHS000337,1,29982834,-,AACCCCAATGTCTACAATGTATATAATAGATGCATTTCGGGTAAATTTGG,,A,G,1,rs30563923,,,,0,,,,1,0,0,,,
gUNC365663,1,30009620,+,TTCCCAAGCAACTTCTCTACTACCTCTTTATCTAAATCCAGCCATGAGGC,,T,C,1,rs30709525,,,,0,,,,1,0,0,,,
B10010030658,1,30658791,+,CATATACTTTGCCCAAACCTCTACTCTTCTCATATATGATGATTTTTTTA,CATATACTTTGCCCAAACCTCTACTCTTCTCATATATGATGATTTTTTTT,A,T,1,rs36438735,,,,0,,,,1,0,0,,,
mbackupUNC010061308,1,30774797,-,TCTAGCCCCATCGGCTGATTATTACTGGTGGCCTAGTCGTTTTACTTTTT,,G,A,1,rs33860392,,,,0,,,,1,0,0,,,
S3C011232625,1,30815639,-,CTCTGCTTCCTAAATTCTTAGATTTTAGTGCCTGTCTTCATCTCTGCAGG,,C,T,1,rs31081899,,,,0,,,,1,0,0,,,
gUNC378094,1,31277378,+,GAGGCAACGCTGGAGATAGAAACCCTAGGAAAGAAATCTGGAACCCCTTC,,C,T,4,rs247443356,,,,0,,,,1,0,0,,,
SBR011268975,1,31724386,-,TATCAGTGTAGAGATTATCAGTATTTCCAACCAGATGCACCTGACCTCTG,,G,T,1,rs3712692,BALB/c,strain group,"BALB/cByJ, BALB/cByJRj",0,T,,,1,0,0,,,
gUNC383274,1,31857418,+,TATTCCAAATCCCCAGTCCCATGGGGCACCACATGCAGAATTTCTAGACA,,A,G,1,rs32749410,,,,0,,,,1,0,0,,,
DX1023584691,1,32656205,+,ATTTAGTCAGGAGAAATTCTTTTTATGCTTTAGTGAACATTTTACTCCAC,,A,G,1,,129X1/SvJ,substrain,129X1/SvJ,0,G,,,1,0,0,SPIKE,,
gUNC394961,1,32864214,+,TGAGCTATTTACATTGATGAAACTTGGTTTTATTTTTTCAGATTGTGACC,,G,A,1,rs32312771,,,,0,,,,1,0,0,,,
SBT011330383,1,33259584,-,AATAGAATTCCAATCAAAACTGAAACTATATTCTTCACAGAAATGGGAAA,,T,C,2,,BALB/cJBomTac,substrain,BALB/cJBomTac,0,C,,,1,0,0,,,
gUNC401821,1,33371703,-,ACACTAAGGAAATGTATGAACAAAATTAGGAGCCTGTATAAAGGGTCATG,,G,A,1,rs48539157,,,,0,,,,1,0,0,,,
UNCHS000395,1,33763797,+,CAGGGAAAATTCTGTCAAAAACTAGTTAAAAAGCCCAATGATCACATTAG,,G,A,1,rs51509920,,,,0,,,,1,0,0,,,
SFJ011356913,1,33922848,+,ACATAGATTTAAACATTTGTTGAGAGAACTGAATGAAGAACATCAGAAAT,,A,G,1,rs387309684,FVB/NJ,substrain,FVB/NJ,1,G,,,1,0,0,,,
gUNC414357,1,34103495,+,TGCTCTTACCAGGAAACATCATTAATTCTGCCAGGTGGGCAAAATGAACC,,T,C,1,rs36450185,,,,0,,,,1,0,0,,,
mUNC417887,1,34280556,+,GGTTGCTAGCAGAATACTGACTTCCAGTCAGCTAGGATGAAGGTCTTAAA,,G,A,3,rs220187123,,,,0,,,,1,0,0,,,
gUNC427885,1,34835546,-,TTGAACTGGGTTCTCTGGAAAAGCAGCTAGTACTCTTAACCACTGAGCCA,,A,C,3,rs48809347,,,,0,,,,1,0,0,,,
gUNC432749,1,35152984,-,CCATATGCGGACCAGTATTGCCTAAACATACATAACACTGGTCTCTTCTC,,T,C,1,rs37862955,,,,0,,,,1,0,0,,,
SS1011420511,1,35512780,+,CAGAGGCCAGAAAAAGGCATTGGCCCTTCTGAAGTTCCAGGAGGTTGTAA,,G,A,1,rs254326411,129S1/SvImJ,substrain,129S1/SvImJ,0,A,,,1,0,0,,CC,CC
gUNC440036,1,35612876,-,GTGTCCTTCTTGGCCACTTCTTGCCTTATTCTCATTAAAGAGGGTTGTCT,,A,G,1,rs32276681,,,,0,,,,1,0,0,,,
SFT011456424,1,36410619,-,ATCCATGGGAATGCCGTGCCCCCTGCAGTTACAGCCTGGCTTTCACAGAG,,T,C,1,rs219117633,,,,0,,,,1,0,0,,,
gUNCHS000455,1,36576417,-,GCAGCTATGTGTCTCAACATTGCATGTTTTTGCCACTAAATGAAAAACTG,,T,C,1,rs30609891,,,,0,,,,1,0,0,,,
SFT011473093,1,36827331,-,CACATCCAGGACAGTCCTGCTGACCCAGTGGAGAGGCCGATCTACCTGAC,,C,A,1,rs31268142,,,,0,,,,1,0,0,,,
mUNC459946,1,36911745,-,TTGTCCTTTGTTTGTTGCAGCTCATCTTTTGTTTATTGAAACAGGAATAT,,C,A,1,rs32295667,,,,0,,,,1,0,0,,,
D3C011482633,1,37065827,+,GTCACATACGAACTATAGCATCTGGCGTTCGGGTGACTAAGGAAACATAG,,C,T,1,,C3H/HeNCrl,substrain,C3H/HeNCrl,0,T,,,1,0,0,SPIKE,,
DAH011497576,1,37439415,-,ATGTCCTGTTGACTGTGCCTTTCATAATTGTCTCTGTGCTACAACTGTCC,,T,G,1,,A/JOlaHsd,substrain,A/JOlaHsd,0,G,,,1,0,0,SPIKE,,
S6J011498219,1,37455494,-,TCTCTTATCTAGCCTGTATGAGAGAGACCTCAGGTTCAGTCCCCCCCCCC,,G,T,1,rs47435681,,,,0,,,,1,0,0,,,
gUNC469448,1,37639250,+,ATTATTAGGTGTCCCTGGAGACCTTCACAAGTAAACAGGCCTCCTGCCTT,,G,T,1,rs31935537,,,,0,,,,1,0,0,,,
S2J011506860,1,37671514,+,TAGGAGGTGCCTCTTTTTAACCATAACAAAAGATGAGGCAAAAGGGCACC,,G,A,1,rs32418737,DBA/2J,substrain,DBA/2J,0,A,,,1,0,0,,Consensus,Consensus
gUNC472065,1,37907046,-,CTTTCACAGTATCTACCCCAGCTGCTTGGGACTCTGCTCATGAGATGTGT,,A,G,1,rs32960572,,,,0,,,,1,0,0,,,
B10010038107,1,38107994,-,CACCCGTGAGACAGAAAGGCTCGAGATCGCTTCCCTCCCAAAGTGTTAGA,,C,A,1,,C57BL/10,strain group,"C57BL/10ScCr, C57BL/10ScNHsd",0,A,,,1,0,0,,,
S1H011531720,1,38293007,+,TCATTCCATAAGCATGGGTAAGAGGCAGGGTCACAGTCATAGGCAGTGGG,,A,G,1,rs32997824,,,,0,,,,1,0,0,,,
gUNC484960,1,38890061,-,ACTTTCCAGCCACCTCACTTCTAAGGGTCCTGTGTTATAAAGAGGAGCAA,,A,G,1,rs31596602,,,,0,,,,1,0,0,,,
S6J011558924,1,38973121,+,CGTGGGCAGTTGAATTCTGTCAGATCCTCACTGGACCTCAAAAGCAGAGC,,A,G,1,rs32050965,C57BL/6J,substrain,C57BL/6J,0,A,,,1,0,0,,E2,E3
gUNC487441,1,39014729,+,GACTTTCCTGAAGGCACAAAGGTTTAGCCAGAGTAGAATTCAGACTCCTC,,A,G,1,rs32179042,,,,0,,,,1,0,0,,,
DSB011562624,1,39065621,+,AGTTCTCATCTCTGACTCCCTGGTGGAATCCTTTGGAATCTACTGGAAAA,,G,A,3,,,,,0,,,,1,0,0,SPIKE,,
SBR011564753,1,39118826,+,CTGTGTGATGAATCTTGTAAGAGGCAGGAGGCCTAGGTAGGGATACAGAA,,C,T,1,rs33109340,,,,0,,,,1,0,0,,,
SAJ011566142,1,39153574,+,GAGAGAGGACAGGAAGTGGCACAAGACAACATTCAAAGCCTGCCCCTGTG,,A,G,1,rs48011742,,,,0,,,,1,0,0,,,
gUNC496797,1,39633126,+,GGTTTAACTATTTAAATGTGCAGAGCAGAATGCCAACACATTGGCAGAAG,,T,C,1,rs33163385,,,,0,,,,1,0,0,,,
SS1011596109,1,39902739,+,TGGTGGTTGAAGCTGACTGTAGACATTTTCTGAGGCCAAATTAAGTGTGG,,A,G,1,rs216764196,129S1/SvImJ,substrain,129S1/SvImJ,1,G,,,1,0,0,,CC,Consensus
gUNC508015,1,40335763,-,CAAGAGAAGTAGACATCTGGAAATAATCAAACCCAGGACTGAAATCAACC,,C,T,3,rs260446182,,,,0,,,,1,0,0,,,
S3R011633104,1,40827603,+,CCTGTGTGAGGAGACCAGGAAACTCAGGGATGGAAGACACAGCTCCGGGG,,A,G,1,rs30672046,,,,0,,,,1,0,0,,,
S1J011642609,1,41065249,+,ACTGCATTTGATCGATGTTAATTGGCTTCGGGGACAACTGTAGTTAACAC,,C,T,1,,DBA/1J,substrain,DBA/1J,0,T,,,1,0,0,,,
gUNC523256,1,41289098,+,TGCTACATATGAGCAAGCAGTCCTAGATCCAGCCCATGTATGTTCTTTGG,,C,T,3,rs220482417,,,,0,,,,1,0,0,,,
B10010041438,1,41438869,-,TAGCACCATTCAGTGCTGCTTACAGGCTTCTTCTCAAATAATAGTAGCCC,,A,G,1,,C57BL/10,strain group,"C57BL/10ScSnJ, C57BL/10SnJ",0,G,,,1,0,0,,,
S6Y011657685,1,41442142,-,TGTTCTCAGCTTAGTGTGTAGAATGCTACCCATTGGATGTCTGCAGCGAT,,G,A,1,,B6N-Tyr<c-Brd>/BrdCrCrl,substrain,"B6N-Tyr<c-Brd>/BrdCrCrl, C57BL/6NCrl",0,A,,,1,0,0,,,
gUNC525766,1,41477940,-,GTTAAATCTGCTCATATAGAAGTCAGGGAGACACTCTTTGTGAACCAAAG,,A,G,1,rs31822577,,,,0,,,,1,0,0,,,
gJAX00248648,1,42287372,-,TGTTTTTAGTGCATAAACCTATTTCTGACCATATTTCATCCTTTATGTAG,,G,A,1,rs33283187,,,,0,,,,1,0,0,,,
S1L011709298,1,42732451,-,ACCACTGCCAACTGTATTTACTCTCCCTTCTTAAACAGTATGTAACGTTC,,G,A,1,,DBA/1LacJ,substrain,DBA/1LacJ,0,A,,,1,0,0,,,
gUNC548541,1,43131417,+,CTGGTTCTTATTTATTCCAGATCAGCTTAGCAGAGACAGGCTAAGGATAA,,A,G,1,rs31401069,,,,0,,,,1,0,0,,,
gUNC550476,1,43252853,+,CATCCTAGTGAGAGAGCCTCCATCCTGGCTCAGGTAGCAATTATTTTAAC,,G,A,1,rs33384201,,,,0,,,,1,0,0,,,
mJAX00249118,1,44106513,+,GAAACGAGCATTGGGTGGGCGGTGACAGGATTTGTAATAAGTGGTAATAG,,G,A,1,rs31247445,,,,0,,,,1,0,0,,,
gUNC569059,1,44497145,+,AACCCAATCAAATATGGAGTATAGAAATAAACAGAGGATTCACAACAGAG,,A,G,4,rs51713103,,,,0,,,,1,0,0,,,
gJAX00249409,1,45598788,-,ACTCCAATTCCAGGAAACTTGGTTCCCTCATTGATCTCCAAGAGCGTTAC,,T,C,1,rs31983590,,,,0,,,,1,0,0,,,
DBC011832602,1,45815068,+,ATGTGTCTCGTGTTCTGGCAAATAGCCCACTGCTTTCTTAAAGAACTGTT,ATGTGTCTCGTGTTCTGGCAAATAGCCCACTGCTTTCTTAAAGAACTGTA,T,A,1,,BALB/cAnNCrl,substrain,BALB/cAnNCrl,0,A,,,1,0,0,SPIKE,,
gUNC591481,1,46020928,-,CTTCTGAGTGCTAGGACCCTGTTACTTTCTATGGTCTATCTAGAATGCCT,,A,G,1,rs33598084,,,,0,,,,1,0,0,,,
gUNC593079,1,46291623,-,CTCCATCCCTGCAGTCAATAAGAGATTCTGCAAATGGGAAACAAAGCTAA,,G,T,1,rs32358222,,,,0,,,,1,0,0,,,
B10010046860,1,46860376,-,GTTTCTTGAGGCTGCCCATGGTCCATTTGTAGAGGTTTCTGCACCACTGA,,G,T,1,,C57BL/10,strain group,"C57BL/10ScCr, C57BL/10ScNHsd",0,T,,,1,0,0,,,
gUNC601980,1,47270468,+,TCCTTCTTGGGTATGGGGATGCAAAGCATGAGTCTGCAGGACACAGCCCA,,G,A,1,rs47308113,,,,0,,,,1,0,0,,,
gUNC605533,1,47576642,-,ATACTTTAATTGACACACATGATGGACTAGATGTTAATTGTATATCATAC,,C,A,1,rs212960903,,,,0,,,,1,0,0,,,
gUNC612760,1,48158243,+,GCAGAACATATCAAACTTTACAATTTGAATATCATCAGGAAGACAAAAAT,,G,T,1,rs32618417,A,strain group,"A/J, A/JCr",0,T,,,1,0,0,,,
mJAX00003394,1,48405811,+,TCAAGGTCAGGTGAGTGAGGTAAATAATTGATCATGAATGGGATGGTCCA,,C,T,1,rs32306774,,,,0,,,,1,0,0,,,
gUNC618599,1,48729521,-,TTTGTCAGATTTTTGCTCTACAAGTCAGAGTTGAGGAGCAAAGCTTATAA,,G,A,1,rs31731870,,,,0,,,,1,0,0,,,
S6T011961269,1,49031730,-,TAATGCAACCACAGGAGTTCCCTACTTCATTGCATTGGATGGGTGTAAGT,,T,C,1,,C57BL/6JBomTac,substrain,C57BL/6JBomTac,0,C,,,1,0,0,,,
gJAX00003475,1,49480654,-,CACTATCACTATAGTAGAGGGTTTTCAGATTTTTCTTCATGAACATATTT,,C,T,1,rs50235267,,,,0,,,,1,0,0,,,
DFH011981320,1,49533020,+,ACCAGGGGAAATAATTTGCCCAGGGTTTACAAAAACAGGTGAATAAGCCA,,G,A,1,,FVB/NHsd,substrain,FVB/NHsd,0,A,,,1,0,0,SPIKE,,
SBJ012005991,1,50149799,+,TGTTTCCATAGAAAAAATTCAGGCAAGCTCAGTAAAGTTTATGTGTCAGC,,A,C,1,rs257888753,BALB/cJ,substrain,BALB/cJ,0,C,,,1,0,0,,,
gUNC641785,1,50381912,-,TTGTATATTAATATAATGGACTACTGTACCTGGTTGAAATGGATATAAGA,,G,T,1,rs31825588,,,,0,,,,1,0,0,,,
S3N012018541,1,50463537,-,CAAGGAAGACAAATGTTAGTGCCTCCAAGATAAGAAATGACCAACCCCCC,,T,G,1,rs107963263,,,,0,,,,1,0,0,,,
gJAX00250282,1,50980304,+,TTTGGATTAGGGAGTACAGCAGAGACCACATAGGGAACAAAAGCTGAACG,,C,A,1,rs33766873,,,,0,,,,1,0,0,,,
S2T012042595,1,51064876,+,TTCAATGCCAGCTCATGTCAGAATGCAAAGTGTGGCATCATAGAAATATA,,G,A,1,rs13475864,,,,0,,,,1,0,0,,,
gUNC656936,1,51530355,-,GAAGGGTAAAGTCAGGTGATATTAAGTGGTCAGCTTATGGCCACCTGGTC,,C,T,1,rs32240128,,,,0,,,,1,0,0,,,
B10010052095,1,52095351,-,GATTAGATAGGAAGTCTGAGGTTTCAGAATACAGAAATGAAGAACCATTT,,C,T,1,,C57BL/10,strain group,"C57BL/10ScSnJ, C57BL/10SnJ",0,T,,,1,0,0,,,
SBJ012083864,1,52096623,-,AAGAATGACTTTCAGTTTCCAAAACATGAGTTCTTGCTTTTAAAATTCTG,,C,A,1,rs237355153,BALB/cJ,substrain,BALB/cJ,0,A,,,1,0,0,,,
gUNC667964,1,52186689,+,AGAAGCATTCCAATTCAACAAATATTTTAGTTGTATACTTAACACCTTCA,,A,G,1,rs38350665,,,,0,,,,1,0,0,,,
B10010052300,1,52300887,+,CTTCAACAGTCAAACCTTACTAATACTGAGGCAGCAAGTGAGGAACATGG,CTTCAACAGTCAAACCTTACTAATACTGAGGCAGCAAGTGAGGAACATGC,G,C,1,,C57BL/10,strain group,"C57BL/10ScCr, C57BL/10ScNHsd",0,C,,,1,0,0,,,
mUNC671488,1,52470794,-,AGAAGGCTACAGAGACCCAAAATAAGCCTTGTACCAAATACAGTAAAGAC,,T,G,1,rs50448576,,,,0,,,,1,0,0,,,
SBC012102446,1,52561170,+,CCTTGTTTTACAAGTCAAATTATTTTTCAGTGTAGAAATACTATAAAGAA,,C,T,1,rs222522919,,,,0,,,,1,0,0,,,
gUNC677249,1,52869070,-,TCCAATACAATTTATATCCCAAATCTCCCAAAATCTGAAACTGAAATGAA,,G,A,1,rs32747872,,,,0,,,,1,0,0,,,
mUNC684769,1,53633499,+,TTCATAAGCTACCTTGACAATTTCTGTTCTCAAAAAAGGGTAAAATATTA,,G,A,1,rs32760819,,,,0,,,,1,0,0,,,
SFJ012152697,1,53817441,-,ACCAGATGTGATTTGAGAAGCAACGATGGCATTAGATTGTGGGGCAGTCA,,A,G,1,rs51741350,FVB/NJ,substrain,FVB/NJ,0,G,,,1,0,0,,,
gUNC696705,1,54582512,-,CTGCCTAGTGCTAGAATCACAAAAACACTACTTGACAAGTTTGTTGTTGT,,C,A,1,rs257433848,,,,0,,,,1,0,0,,,
mbackupJAX00251301,1,54855699,-,GCTGTTTTTAACAAGACTCCTTCTGTTGATGTGGTGGTTCATCCTATTCA,,A,C,1,rs51040603,,,,0,,,,1,0,0,,,
gUNCJPD000159,1,55571086,+,TGTGGAGAGGTTAATAAGTGTCAGGTCCAAAGCATAATTATTTGGTCCAT,,G,A,3,rs50798734,,,,0,,,,1,0,0,,,
DNT012225925,1,55648134,-,CTGGGAGAGGCAGAGTCTGGGAAGGAAATCCAACGCTATAAAAGTAGAAA,CTGGGAGAGGCAGAGTCTGGGAAGGAAATCCAACGCTATAAAAGTAGAAT,A,T,1,,,,,0,,,,1,0,0,SPIKE,,
S3T012240132,1,56003311,+,GAATTTGCTCATCCAGGACATTTGGGGCCCTGAAGAGTGTTTGTCTAATT,,C,T,1,,,,,0,,,,1,0,0,,,
gUNC715622,1,56042782,-,GGAGCTTATTCATGTTGTTTTGTTGCTAAACTGCCTTCAAAATATTGAAA,,G,T,1,rs219763816,,,,0,,,,1,0,0,,,
SBT012244057,1,56101442,+,TTCATACACCAAAATGTCTTATAGTATATGAGAAACAAAACATGTCTTAG,,A,G,1,rs240905592,,,,0,,,,1,0,0,,,
S1H012246503,1,56162592,+,ACAAATTGGAATGTAAGAAAGGACTTGAATCACAGTTAGCAAGGGTTGGC,,G,A,1,,DBA/1OlaHsd,substrain,DBA/1OlaHsd,0,A,,,1,0,0,,,
S3R012255809,1,56395243,+,ATGATGTCTTTAAATTCTAAACTCATGTCATTAAAGAAAACTTGAGCATC,,C,T,1,,C3H/He,strain group,"C3H/HeNRj, C3H/HeNTac",0,T,,,1,0,0,,,
gUNC721751,1,56576620,+,TTCTTTCTTTCTCCTGTGGTTCAGCTCTGAGATTTGGTTTATTTATCATA,,T,C,1,rs37408328,,,,0,,,,1,0,0,,,
SBH012287531,1,57188286,-,GCCATTAATATAGTTGTTGGTATCTAGACCTTTTCTTTCAAATATAGGTA,,G,A,1,,BALB/cAnNHsd,substrain,BALB/cAnNHsd,0,A,,,1,0,0,,,
B10010057302,1,57302142,+,TACACCACCATCAAAGCCATCTCATTACGCCCAGTGCTGAGAGTTAAAGC,,G,A,1,,C57BL/10,strain group,"C57BL/10ScSnJ, C57BL/10SnJ",0,A,,,1,0,0,,,
mUNC010731340,1,57358576,-,TGTTCACTCCCAGAAAACAGAATAGCTGAAGAGACAGCCACAGCATTAAA,,G,A,1,rs37771852,,,,0,,,,1,0,0,,,
S2R012302953,1,57573842,+,GCTTTCAACTTCGTAAGAATTCTCATTGTAGGTTTTTAATCCCAAGCCCC,,T,C,2,,DBA/2JRj,substrain,DBA/2JRj,0,C,,,1,0,0,,,
gJAX00252106,1,58184930,+,GGAGTACTGTCCCCTTGGCCACAAAAACTAAAGCTACTAATGGAAGACCT,,A,G,1,rs29692016,,,,0,,,,1,0,0,,,
S3T012336142,1,58403567,+,TCCAATGAACTGATGACAGTGGTAAAGGTGAGCTATGATCTATATTGTGG,,G,A,1,,C3H/He,strain group,"C3H/HeNRj, C3H/HeNTac",0,A,,,1,0,0,,,
mbackupJAX00252178,1,58523233,-,ACTTCCCAAGTATTGAGAGGATTCTGCTGGTGAACATTATGGGTAGGCAT,,T,C,1,rs31967507,,,,0,,,,1,0,0,,,
mUNC010101768,1,58897358,+,ATGTAAGACAACCTGGAGGCAGTGTGGTCAGTGAGTGAGAGGACTCAGCC,,C,A,3,rs248621315,,,,0,,,,1,0,0,,,
S3J012387883,1,59697078,-,CCCTGTAACTGAGTGATGGGTAGTAATGACCTGTGTAATGCTGGTAATGG,,C,T,1,rs248934586,C3H/HeJ,substrain,C3H/HeJ,0,T,,,1,0,0,,,
mJAX00004261,1,59995627,+,CAAATGTGCTCTCCTCTCTTCAGGAGGACTATCTAACCTTACAAGGCAAA,,A,C,1,rs49338702,,,,0,,,,1,0,0,,,
gUNC766527,1,60400655,-,AGGAAACGTTATCTCAGTCCTCTTTTATAAATACACCATTGCCATCCCAC,,A,G,1,rs29697403,,,,0,,,,1,0,0,,,
gUNC770116,1,60761817,+,TCTAGACCTCATTCAGTCATCTTTTTCTTTTTAAACAAATGTACAGGGAC,,G,A,1,,,,,0,,,,1,0,0,,,
gJAX00252751,1,61312969,-,ACATGTTGGTTTTTACCTGTCTCAAAGAGGATGAAAACAGAGAGACCACC,,C,T,1,rs29796852,,,,0,,,,1,0,0,,,
mJAX00252874,1,62174904,+,GAAAGATTCAGAAACTACAGCAGCAATAGCATGGCACGGTGTGAGTTGGG,,C,A,1,rs29896709,,,,0,,,,1,0,0,,,
gUNC791131,1,62719241,+,GTGGGCCCTAGCCACAGAGGGCCACTTAAACATGGCATTAGCTTCTAGGA,,G,A,1,rs31887679,,,,0,,,,1,0,0,,,
gUNC794531,1,63003989,-,CTTCTGTGCCTGATTTTTTCATAATTTAGTTCACACCCAGTAGATAGGAC,,T,C,1,rs29993588,,,,0,,,,1,0,0,,,
gUNC800056,1,63628812,+,TCTCTCTCTTTCACTCTCCTTCCTTCCTCTGTCTATGTGTCTCTTTCTCT,,C,A,3,rs252989275,,,,0,,,,1,0,0,,,
S6R012573674,1,64341862,+,TCCTTCTCGAGAGTGGACAGCTGCTGTCACAGGGTGTCCTTATGGCTCCC,,G,A,1,rs221783694,C57BL/6,strain group,"C57BL/6NJ, C57BL/6NRj, C57BL/6NTac",0,A,,,1,0,0,,,
mUNC807932,1,64378809,+,ATATTTCTGCTTAACTGAGTTGTGTAGACTGGAGAGCTGAGCAGGTGACC,,A,G,1,rs30140700,,,,0,,,,1,0,0,,,
S3J012581196,1,64529903,-,CACCAACAGCTGGGGCATAGCACATTTATTATATACAGCACAAAAGAGGG,,C,T,1,rs249545823,C3H/HeJ,substrain,C3H/HeJ,0,T,,,1,0,0,,,
SAJ012588017,1,64700440,+,AGATTATCCCATCTTGTTCCCAAGGTAGACTGTAGCAAGAAGTGAGTGTG,,T,C,1,rs30183905,A,strain group,"A/J, A/JCr",0,C,,,1,0,0,,,
gUNCHS001070,1,65297957,-,AAGCTTAGCAGAGCATCATTAATAGTGTCAGAGATTGATTCTTGACCATG,,T,C,1,rs233611600,,,,0,,,,1,0,0,,,
gUNC821869,1,65504911,+,CTGGTACCATGGGTGGAGGGAAGGTCTGTGGATGTCTTTTCCAGCCCACA,,T,C,1,rs32848413,,,,0,,,,1,0,0,,,
S2J012625388,1,65634719,+,GAGGTGATTTCCTACCTACTTCTTCTGATTTTATGTTTTATATTTCTATT,,C,A,1,,DBA/2J,substrain,DBA/2J,0,A,,,1,0,0,,Consensus,Consensus
S6Y012629524,1,65738101,-,CGATGATTCTTTATTAGCAGGCTAGTGTTTGAATCCTCACAAAACCAAGT,,A,G,1,,,,,0,,,,1,0,0,,,
B10010065887,1,65887815,+,TTGCCTGTATTGTCCTATCTTCCTTCCCTGAATGCATCACCTTCCTGATT,,C,T,1,,C57BL/10,strain group,"C57BL/10ScSnJ, C57BL/10SnJ",0,T,,,1,0,0,,,
D2R012646995,1,66174897,+,TTGAAAGGATTCAGCTGTGATACAAAGAAGGGAAAAAGCAGCGTCTAAGA,,C,T,3,,,,,0,,,,1,0,0,SPIKE,,
gUNC835226,1,66437231,-,AACATTTTCCTTATCATTATTTCCTGAATGTTACACAATCAAGATTTACA,,G,A,1,,,,,0,,,,1,0,0,,,
S3T012671388,1,66784713,-,AAACATCTGCATCTTGGAAATTACATTTTCATCCTTTGGACGTAGTAATA,,T,G,1,,C3H/HeNTac,substrain,C3H/HeNTac,0,G,,,1,0,0,,,
gUNC842284,1,66943552,-,TCTCTAAAATAACATTGAATCAGAGCACACTTGGATTTATGTGATGAAAT,,G,A,1,,,,,0,,,,1,0,0,,,
gUNC853754,1,67749123,+,TTGCTTAAATTACTGGAAATTATGTAAAAGGACAACACAAGGTCTAAAAT,,G,A,1,,,,,0,,,,1,0,0,,,
gUNC861166,1,68301441,+,ATGAGCTTAGCCTTTAATGGCTGAGCCATCTCTCCAGCCTAACCCTAACC,,C,A,1,,,,,0,,,,1,0,0,,,
S6H012742425,1,68560634,+,ATATAGTTTTGTCCCACGAATAATGCGTAAATTCTCCAGAGGCAAGTAAC,,G,A,2,,C57BL/6JOlaHsd,substrain,C57BL/6JOlaHsd,0,A,,,1,0,0,,,
S6N012746065,1,68651628,-,TGAAGAGAAGAAAGGTGAGAGGGAAGCTATAGGTGTTATCAGACTGTCAA,,C,T,1,,C57BL/6NJ,substrain,C57BL/6NJ,0,T,,,1,0,0,,,
gUNC868588,1,68813136,-,TCAGCCTTCCATGTGCTAACTTAGATTACAAACATCATCCCCATGTTGGC,,T,C,1,,,,,0,,,,1,0,0,,,
S6T012758000,1,68950024,+,TTATTCAGTGTGCTGTTATAAAAAGAGCAATGGGGGCTATGAATCATCTC,,A,G,1,,,,,0,,,,1,0,0,,,
S6Y012759490,1,68987254,-,ATGATTGGCTTAATTTGAGTTTAAACCCAATAGTCTAACTTTAAAATCTG,,G,A,1,,,,,0,,,,1,0,0,,,
ST2012764014,1,69100366,+,TACTGAGCTATCCTCATGGGAGATATTTAATGATGTTGCAAAGGAAGTCT,,T,G,1,,129T2/SvEmsJ,substrain,129T2/SvEmsJ,0,G,,,1,0,0,,,
S6H012772559,1,69313994,+,AATGCTACAGGGGAAAAAAGTGTCGATGGGGGAGTAAAGGTGGTTGGAAC,,C,T,1,rs38818277,,,,0,,,,1,0,0,,,
UNC878465,1,69575211,-,TTTGGTAACAGGCTTATTTGTGTTTCTTTAAGCTAGGTATAGAAAGGTGT,,T,G,1,rs229730889,,,,0,,,,1,0,0,,,
gUNC878906,1,69613103,+,CTGCCATATTCTGTCATCATGGACCCCAAACCTCTGAAACTGTAAGCCCA,,G,A,4,rs257188989,,,,0,,,,1,0,0,,,
S2J012791333,1,69783340,+,TTTACTTATCTCGGCACACCCATCTACCATGCATGGTATATTACAGCCCC,,A,G,1,rs244216730,DBA/2J,substrain,DBA/2J,0,G,,,1,0,0,,E2,Consensus
gUNC890096,1,70463623,+,GTATCAGTAAGCAGACAACAAAGTCTAACAGTTGACAGTTGGGGCCAATG,,A,G,1,rs258077759,,,,0,,,,1,0,0,,,
SBT012843991,1,71099797,-,GGCTGGCAGAAAGCAGAGAACTAATGTGTTCCTAAAGGAAGCAGGAGATG,,G,A,2,,BALB/cJBomTac,substrain,BALB/cJBomTac,0,A,,,1,0,0,,,
mUNC898891,1,71165438,+,CAAGCTCCAGATCAGCCAGGATTACATAAAGAATCCTTGTTTCAAACAAT,,T,C,1,rs244572136,,,,0,,,,1,0,0,,,
S2T012867160,1,71679002,-,ACAAAGTTGTTAGTAGAATGGACTCATGGGATAGGGAAAGCTACAGTTTG,,G,T,2,,DBA/2NTac,substrain,DBA/2NTac,1,T,,,1,0,0,,,
gUNC910607,1,71974016,-,GCCTCTGCAGTTACTGCTGCTTATAGCAAAATGCTGCTGTGACCCAATCT,,C,T,1,rs244206007,,,,0,,,,1,0,0,,,
S3R012880759,1,72018989,+,TGCAAATTACAGAGAAACTGTATGTGGAGTACTTCCTGATTCAACGTCCC,,C,T,2,,C3H/HeNRj,substrain,C3H/HeNRj,0,T,,,1,0,0,,,
gUNCHS001216,1,72498908,+,CTGACCAATGTGGAAGAGTCAGTCTGCTCCTGGCTTCCTTTGGATGAAGA,,C,T,3,rs32357657,,,,0,,,,1,0,0,,,
S2C012911475,1,72786877,-,CACTGAAGGGGGGAAGGCCTCAGTCTGCTCTGTGCTGTTGGACTGGACTC,,C,T,2,,DBA/2NCrl,substrain,DBA/2NCrl,1,T,,,1,0,0,,,
mbackupUNC010570475,1,72830096,+,CTGAGTTTTAGAGATGGAACTTCCCCAAACAAGGGACAAGGGACAAGGGA,,T,C,1,rs46316475,,,,0,,,,1,0,0,,,
gUNC935659,1,73663429,-,ATTTCCAGAGTCATATGTCTGGGATGATGTTAATTTGCCTTCTAGTTTTA,,C,T,1,rs31726557,,,,0,,,,1,0,0,,,
SBB012960401,1,74010045,-,GGAGGTTGTACAGTCCAGAAGGGCTAGGAGCATGAAGCCGCTCTTGAGGT,,C,T,1,,BALB/c,strain group,"BALB/cByJ, BALB/cByJRj",0,T,,,1,0,0,,,
mUNC010142203,1,74066657,-,TTGGGAAGCTGAGTTCTGTACTGTGGGTTTGTAGCTAGATCAGCTTGATG,,C,A,1,rs224020517,,,,0,,,,1,0,0,,,
S2J012963713,1,74092826,+,GTTATTCCCCTAGAAATGGAGGAAGGAGAGGACCACACTCCCTTTTCACC,,C,T,1,rs49332564,DBA/2J,substrain,DBA/2J,0,T,,,1,0,0,,E2,Consensus
gUNC946116,1,74428797,-,CCCTTCTACCTCTGTTTTCAAGTTCTAGGAACACAGGCATGCCTCATCCA,,G,A,1,rs31836817,,,,0,,,,1,0,0,,,
DFR012985107,1,74627697,-,GCCCTATATGTCAGGTTTAGCTTTGTGGGAGGAAAACTTCAGCCAAGAAC,,C,T,2,,FVB/NRj,substrain,FVB/NRj,0,T,,,1,0,0,SPIKE,,
B6_01-074963079-S,1,74916505,+,AAAAAATTGAAAGCTAGAAAAACATAGTGCCTGGGTCTGTAGCATTCAGA,,T,C,1,rs31890646,C57BL/6J,substrain,C57BL/6J,0,T,,,1,0,0,,E3,CC
SFJ013000136,1,75003414,-,TCTGTAGATCCCTAGTTTCTGCCTTTGGAAGCTGGGATGACAGGCAGGCC,,T,C,1,rs386957864,FVB/NJ,substrain,FVB/NJ,0,C,,,1,0,0,,,
DS6013010790,1,75269756,-,TTCCTGACTGAGTGAGAAATGACACCAATTCAAGAAGTCTTACAGGAGAG,,G,A,1,,129S6/SvEvTac,substrain,129S6/SvEvTac,0,A,,,1,0,0,SPIKE,,
SS1013013028,1,75325708,-,CATTTTGGTGTTCCCACCTTCTGGCACAACCACATGAACAGAGAAATCAC,,A,G,1,rs235156320,129S1/SvImJ,substrain,129S1/SvImJ,0,G,,,1,0,0,,CC,CC
S6J013019470,1,75486756,-,GTGTTGGATGCGGGAGGGGGTCGAACTCTGCCCGGGAAACAAGTATGAGA,,G,A,1,rs31502068,C57BL/6J,substrain,C57BL/6J,0,G,,,1,0,0,,E3,CC
SS1013039135,1,75978380,-,TATTGCTCTCCCCAACTGCCAGCTGGAATTGTTTCCATCTAGGAAATCAC,,C,T,1,rs49227670,129S1/SvImJ,substrain,129S1/SvImJ,0,T,,,1,0,0,,CC,CC
S3N013040016,1,76000421,-,AGAGCTGACTGTGAGCACCATCTTCAAGTGGAACTGGTGTTCTTTCAAGA,,C,T,1,rs47551918,,,,0,,,,1,0,0,,,
mUNC964922,1,76148253,+,AGGAGGAAGGCTTGGAATAGGGCTGAAGAAAAGCATCATGTTATCTGAAT,,C,T,1,rs30146636,,,,0,,,,1,0,0,,,
S2J013046727,1,76168175,-,AATTCACATTCCCAGCTCAAACTTTCAAACTAACCGTAGAGTTGGAAATC,,C,T,1,rs30151725,DBA/2J,substrain,DBA/2J,0,T,,,1,0,0,,E2,Consensus
gbackupJAX00005508,1,76703258,-,ACTCATTGATTTGCTGATTTGAGAGAGCCAAAGAAAACCCTTTCCAGAGG,,A,G,1,rs47211584,,,,0,,,,1,0,0,,,
S2R013077318,1,76932974,+,CCAATGCTATTTGCTATAAAGGTTAGATTTCTTGAAACATCTTCCTGGAC,,G,A,1,rs30541972,,,,0,,,,1,0,0,,,
gUNCHS001315,1,76973478,+,TTCTGCTTAAAAGTGACCTTCCGCATGGCCTTTTTGTCTCTACCTGTCAG,,C,T,1,rs32807111,,,,0,,,,1,0,0,,,
S2T013085688,1,77142220,+,CCGTACTTATACTCCTGGCCATGTGAATAAATACCGGGTGCCCTTTGGTA,,T,C,1,,DBA/2,strain group,"DBA/2NCrl, DBA/2NTac",0,C,,,1,0,0,,,
SSR013088151,1,77203778,+,TCTTGTGATACTTTCTTTTACTGTCTGGATCTAATTTGAGTTCTTAACTA,,C,T,1,rs31951305,,,,0,,,,1,0,0,,,
S3N013089544,1,77238600,-,GAAATCAAGGACATGGAAAAGTATCTATGTGCTTTCTATTGCTGCAATAA,,C,T,1,rs262003948,,,,0,,,,1,0,0,,,
gUNC982810,1,77598775,+,TTGAAATCTCTTCCCCTCCAATTCTTTCCTCCCTCTCTCCCTGGATCCCT,,T,C,1,rs52212086,,,,0,,,,1,0,0,,,
D2T013112850,1,77821260,-,AGGGTATCAAGCCTATAGAGCATGGTTAGCCCTTTAACTATTAGGTAGAT,,G,T,1,,DBA/2NTac,substrain,DBA/2NTac,0,T,,,1,0,0,SPIKE,,
SBB013116937,1,77923433,+,TTTAGCTATCCGTAGTGAACTCTCATTGCATACAAAGTATTTGCCATTAG,,G,A,1,,BALB/c,strain group,"BALB/cByJ, BALB/cByJRj",0,A,,,1,0,0,,,
gUNC988578,1,78083320,-,CATGAATTCAATAAGGAAGGGTGGCTTTCAGGACTTCATTACTCCTCGAT,,C,T,1,rs108685512,,,,0,,,,1,0,0,,,
DZO013129336,1,78233405,-,AAACAAGATGACTCCCTGAAAATCAGCCAAACCCTGAGTGGCCTTGAGAT,,G,A,1,,NZO,strain group,NZO/HlLtJ,0,A,,,1,0,0,SPIKE,,
S6J013139471,1,78486797,+,AATCAGAAACCAGTTCACAAGAAAATGAATATCAAAGAACAAACAAAAAG,,T,C,1,,C57BL/6J,substrain,C57BL/6J,0,T,,,1,0,0,,E3,CC
S6T013141533,1,78538341,+,GGAAAATGGAGGTCTGGGGTTATGACCAAGTGGTACAATGCTTACCTACC,,A,G,1,,,,,0,,,,1,0,0,,,
gUNC1004197,1,79223560,+,AAACTGTTTGGTACTCTGTCACTTCTCTTCTTGGGGGAAAAGAAAGAGGA,,T,G,1,rs30191546,,,,0,,,,1,0,0,,,
B10010079369,1,79369288,-,ATATAATGGTGGTAAGTTGGGGCGGAGATTAGAACCACAACTTGCTCTTC,,C,T,1,,C57BL/10,strain group,"C57BL/10ScSnJ, C57BL/10SnJ",0,T,,,1,0,0,,,
S6J013178782,1,79469566,+,AGTGACTCCAACACAAACATTGTTCCAACAAACATGACAGTGCCACCTGA,,A,G,1,rs48921329,,,,0,,,,1,0,0,,,
S1J013199062,1,79976562,-,AAACCAAAAACAATAACCAAGGACTTTCTTCTCAGAACCTCTGGAAGGAT,,G,T,3,,,,,0,,,,1,0,0,,,
S1H013204417,1,80110429,-,TATTGGGGGAAATTAGCAAGTTCTACCGTGGGTTGTTAGCAGTAGATTTC,,A,G,1,rs32957217,,,,0,,,,1,0,0,,,
gUNC1017671,1,80110958,-,CAATCAAATGCTCCTCTTTGGCTCAACCAATTAACATGCCCAATTAAAAT,,A,G,1,rs222207096,,,,0,,,,1,0,0,,,
SFT013210000,1,80250007,-,TGAGTTGGCAGGCTGTGGGTTAAAACAATCTCCCTTTTTCTGCCTATCAT,,C,T,1,rs48201664,,,,0,,,,1,0,0,,,
gUNC1023024,1,80507139,+,CCAGCTTTACAATACCAGCTTCTATTCCCATGCACGCGCATGAGTGAAGG,,G,A,1,rs219329127,,,,0,,,,1,0,0,,,
ST2013252820,1,81320511,-,TGTCTTCAGATGATTTACAGATTATCACTGTACTTAGTCTAAAATATTCA,,C,A,1,rs46179993,,,,0,,,,1,0,0,,,
mbackupUNC010158882,1,81388723,+,TGTAGCATTTTAAATTTTCATGAAGTTAATTTTACGTGTCTATAATTGTG,,G,T,1,rs50506275,,,,0,,,,1,0,0,,,
gUNC1037970,1,81784142,+,TTATAAATGCTTGTTGACAATTATCAATTCTCTGAAGAATTTAAAAGAAA,,C,T,1,rs32331994,,,,0,,,,1,0,0,,,
DP3013281739,1,82043486,+,TCCTACATGTTGGGGCTTGGATGAATACCCTGAAACATCCATACACAAAG,,G,T,2,,129P3/J,substrain,129P3/J,0,T,,,1,0,0,SPIKE,,
S3C013281787,1,82044677,-,GATCAAATCCGAGGGCCAAATTTCAGTGCCACTCTTATAGGAGACTAATT,,C,A,1,,C3H/HeNCrl,substrain,C3H/HeNCrl,0,A,,,1,0,0,,,
gUNC1047748,1,82629781,+,CACCAAGACACAAAATAACACTCCCAGTTTATGAGGGTAGACTTGGCACT,,A,G,1,rs30241626,,,,0,,,,1,0,0,,,
gUNCHS001436,1,82923918,+,GGAAGAAGTATGTCATTGTGGGTGTGGGTTTGAGACCCTCATCCTAGCCA,,C,A,1,rs258448199,,,,0,,,,1,0,0,,,
S3J013334357,1,83358931,-,TCGAAGCAGGAGAATCACCAGAGACTCAAGATGCCAGAAGTTGTCATGCA,,T,C,1,rs258325874,C3H/HeJ,substrain,C3H/HeJ,0,C,,,1,0,0,,,
gUNC1064152,1,83817507,-,TGGGGGGGGGGGGCGCAGAATACCCAACTGTGACTCAATTGCTAAAACTT,,A,C,1,rs220824419,,,,0,,,,1,0,0,,,
DS4013356980,1,83924510,-,GATTAACAAGTTAAGGGCTCAGGCCAGAGCATTACATTAAGTTCTGATTG,,G,A,3,,,,,0,,,,1,0,0,SPIKE,,
DFT013364355,1,84108898,+,GAAAAGAGCTGGCCCAATGCTCCTGAGATGACTATCACATTTAAACTGCT,,G,T,1,,FVB/NTac,substrain,FVB/NTac,0,T,,,1,0,0,SPIKE,,
gUNC1071271,1,84468139,-,GTCATTCCTGAAAATATAATACAAGTAATGCTATACAGACTGAGCAGGTT,,G,T,1,rs234365371,,,,0,,,,1,0,0,,,
gJAX00006124,1,84908968,+,ACAGAATCTGAAAGCTATGCAGACACATCTCAGCCACTCCCACCAACTTC,,C,T,1,rs48087653,,,,0,,,,1,0,0,,,
mUNC1079635,1,86000814,+,TGCACGACATCATAGAAAACAAACACACACATATGTCCTTTACTGGGAAG,,A,G,1,rs31471116,,,,0,,,,1,0,0,,,
SBJ013453961,1,86349044,+,AGAATGAGAAAAGAAAGCAAACAACCATTTCCAGAAAGGTTTGCTGCTTT,,T,C,1,rs260918005,BALB/cJ,substrain,BALB/cJ,0,C,,,1,0,0,,,
gUNCHS001511,1,86553118,-,AAAGCTGCAACCCTTTAATACAGTGCCTCCTGTTGTCATGACCCCCAGCC,,G,T,4,rs31515446,,,,0,,,,1,0,0,,,
gUNC1092120,1,87579607,-,TGTATAATTCTAGTGGTAACCCTAGGGCACAGATACTGTTTGTCACATCT,,C,A,1,rs47663361,,,,0,,,,1,0,0,,,
B10010087827,1,87827334,+,TGAATGCTCACTTGGGCTACTGGGATGAGCTGGCAAAAATGCCAGCTTCC,,C,A,1,,C57BL/10,strain group,"C57BL/10ScCr, C57BL/10ScNHsd",0,A,,,1,0,0,,,
mUNC010585017,1,88137883,+,GTGTGTCCTGGAAACTACACTAAGCTTAGTGGCCAGCATGCTTGGTTGCA,,T,C,4,rs47858597,,,,0,,,,1,0,0,,,
gUNC1102206,1,88655763,-,AGAAGTATCTGGAGACACTAAGCCAGAGAGAGACATTGGGAGAGGGATGG,,T,C,1,rs32803229,,,,0,,,,1,0,0,,,
mUNC1107274,1,88955170,-,GTAAGGATAGTTTTGACCCATGGCCCCTGCTAACACACAGGTTGCCTTGG,,G,A,1,rs36240563,,,,0,,,,1,0,0,,,
B10010089417,1,89417288,-,ATTTGCTGAATTGAACTAGAAAGCCTCATTGGAGTGTTCTCCCCTATGAA,,G,A,1,,C57BL/10,strain group,"C57BL/10ScCr, C57BL/10ScNHsd",0,A,,,1,0,0,,,
SBB013583156,1,89578900,+,TATTGACCTGGGGCCTTCACGTGCAGATGCACCTCCCCCATATACTCCTA,,C,A,1,,BALB/c,strain group,"BALB/cByJ, BALB/cByJRj",0,A,,,1,0,0,,,
gUNCHS001601,1,89691128,+,TGTAAGTAGGAGGCAAGACTGTGTTGTATCTATAGAGACACTAGTGACTG,,G,A,1,rs32254255,,,,0,,,,1,0,0,,,
S3R013590605,1,89765131,-,TTGGTGAGAGGCAGCATGGAGCAGAACACCACAATGTGCTAAGTAAAGAC,,G,A,1,,C3H/He,strain group,"C3H/HeNRj, C3H/HeNTac",0,A,,,1,0,0,,,
S2H013602293,1,90057344,+,ATTGGGGAGGAGAGTACAGACACATCTAGGCAGCTTAGCTTGTGAGAAGA,,A,C,1,rs30344970,,,,0,,,,1,0,0,,,
mUNC1126248,1,90398581,-,AGAAGTGCCATGGCTGGATCTTTGTGGCTTTTCTATAGATTACAAACCTC,,A,G,1,rs30313052,,,,0,,,,1,0,0,,,
SAH013616907,1,90422690,+,GTCACCACCCCCGAAATCAGTCTGGCAAGGGGACTTCCAAGTGCATGTCT,,T,C,1,rs46298007,,,,0,,,,1,0,0,,,
S6J013624374,1,90609370,+,GTTTCAGCAGTGCTGTCAGTAAGCCCATGTTCACAGGGATACTTCAAGGG,,C,T,1,,C57BL/6J,substrain,C57BL/6J,1,T,,,1,0,0,,CC,Not Fixed
SFC013631975,1,90799394,+,TGATATGCCAAGAATCTGATATGTGCTACCCCTATGAAAGGGGTTCTTAG,,T,C,1,rs238055962,,,,0,,,,1,0,0,,,
SSR013632890,1,90822253,-,AGACTCTCAGTTGGAAACCAGCAGGTCCAAGTGGGGGTGGTACAGTATAG,,G,A,1,rs30801048,,,,0,,,,1,0,0,,,
gUNC1138338,1,91097803,-,ATACTTGGTGGACCATAGGTTTTAGATCCAATCTCGTACCCATAGGTGCA,,T,C,1,rs50175543,,,,0,,,,1,0,0,,,
gUNC1142250,1,91383704,-,AGTCTCAGCATGTGTGTTCATGAGCCAGACAGCAAGAGACAGGGAAAATG,,T,C,1,rs31500165,,,,0,,,,1,0,0,,,
S2C013657783,1,91444593,+,CTCTGACTCAGAGGGGTCAAGATGCTGCAGTCAGGACCTCACCTAAGCCG,,C,T,1,,DBA/2,strain group,"DBA/2NCrl, DBA/2NTac",0,T,,,1,0,0,,,
DBR013664433,1,91610837,-,ATTTACATAGATCCAGGTGGGGCAGAGCAGATAGTCTTAAACTTCCATCA,ATTTACATAGATCCAGGTGGGGCAGAGCAGATAGTCTTAAACTTCCATCT,A,T,2,,BALB/cByJRj,substrain,BALB/cByJRj,0,T,,,1,0,0,SPIKE,,
gUNC1144752,1,91623555,+,TCTGAATTCTGACACAGTTTTAAAATTTAAGTTCCTTTAGGGGCTGGAGA,,G,A,1,rs30843857,,,,0,,,,1,0,0,,,
D6R013664971,1,91624293,-,GAAATGAGGAAGCCTGCTAAACTAAATAAGACAGAAGTTAGACCTGGCAC,GAAATGAGGAAGCCTGCTAAACTAAATAAGACAGAAGTTAGACCTGGCAG,C,G,1,,C57BL/6NRj,substrain,C57BL/6NRj,0,G,,,1,0,0,SPIKE,,
S2C013666467,1,91661697,-,ATGTGTGCAGACAGCAGTGGTCAAGGCCGCAGCCATGGAAAGTCTGAGCA,,A,G,1,,DBA/2NCrl,substrain,DBA/2NCrl,0,G,,,1,0,0,,,
SAC013684650,1,92116262,+,AGCAAAGCCTGAAAGAGGACCCTGTTCCTGCCAGCATGACCATATCACCT,,G,A,1,rs32079110,A,strain group,"A/J, A/JCr",0,A,,,1,0,0,,,
gUNC1153431,1,92373273,+,CTCAGTGCCCCATCTTTCTAGGCGAAAAGACACTCCTTTATGTTCCCAGC,,A,G,1,rs33069894,,,,0,,,,1,0,0,,,
gUNC1153974,1,92412095,-,CTGGCAAGGTAGTACACACCCTTCATCCCAGAAGACTAAGCCAAGCAGAT,,A,G,1,rs30411218,,,,0,,,,1,0,0,,,
SBR013713428,1,92835706,+,GTGTGAGCCACTGGAGAGAAGAGGACATCAAGGCCAGAGAGGCCACATAC,,C,T,2,,BALB/cByJRj,substrain,BALB/cByJRj,0,T,,,1,0,0,,,
gUNC1161628,1,93003253,+,CAAAGGCATCTATGGAAACCCTAGCTAATAGCACAGGCTGGTGATGGACA,,G,A,1,rs51058224,,,,0,,,,1,0,0,,,
mUNC010586869,1,93673229,+,TGAGGAACAATACCAGAGGTTGTTGTCTTACTTAGGGTTTCCATTGTCAA,,A,G,1,rs32218600,,,,0,,,,1,0,0,,,
SNJ013751494,1,93787372,+,TTGGCTTTAGCTTAGGCTTGCTCCCCAACTAGCTTGTAACTCCTTTATCC,,C,T,1,rs236497002,,,,0,,,,1,0,0,,,
gUNC1177319,1,94719270,+,TAGAATCTTAGAGCAATAAAACTTCACCACCACACATTTTCTGTGGTTCT,,T,C,3,rs259461594,,,,0,,,,1,0,0,,,
S2J013806712,1,95167815,-,TATGTGGTCCAGGTTCTTAGGCTAGTTAGTAAGTGTCCTTAATAACTCAG,,G,A,1,rs253150011,,,,0,,,,1,0,0,,,
SAJ013808697,1,95217425,-,CTGTTGATGTATCCTCATATGAGAGGCAGACTCTGCACTTCTTTCATCAT,,G,T,1,rs32143009,A/J,substrain,A/J,0,T,,,1,0,0,,CC,CC
gUNC1183808,1,95247274,+,TAAGTGCCCATGATCTCATTGCTAGGGCTGATGCAGATTCTTTCTTTATC,,T,G,1,rs47289185,,,,0,,,,1,0,0,,,
S6N013829895,1,95747397,-,CCGGAATTAGAGAAACTCTTATTAAAACACCACGGGTGACATTTGGCTGC,,A,G,1,rs214382814,C57BL/6NJ,substrain,C57BL/6NJ,0,G,,,1,0,0,,,
gICR081,1,95752633,-,CTAATATTTAGAATTCTGCTTTTTATTTATAGTTTACTTTGAATATAACT,,A,C,1,rs3700309,,,,0,,,,1,0,0,,,
S2C013837982,1,95949561,-,TAAAATAAAGAGCCAAAATATTCAAGTCTTAGCCTCACTTCACACACCAT,,G,T,1,,DBA/2NCrl,substrain,DBA/2NCrl,0,T,,,1,0,0,,,
gUNCHS001752,1,96141911,-,CCACTAAAATCAGGGACTAGACAAGGCTGCCTATTTTCTCCCTACCTACT,,T,G,3,rs46830684,,,,0,,,,1,0,0,,,
gUNC1203850,1,96731552,+,TTAGCTTTAGGGGAAGGAGATAGGGTGGCAGGCTGCAGGAAGGGGTACCA,,G,A,1,rs50347711,,,,0,,,,1,0,0,,,
gUNC1210515,1,97626757,+,TTTTCCCTGATTTTCCATTCGTTTCCCATGTTAAGTTCCCATGTAACTAT,,C,T,1,rs6358447,,,,0,,,,1,0,0,,,
gUNC1214415,1,97954725,-,AAGCTTATTGCAAGATGGAAGCCCTGTATGGCTCAGTCCAGACCAAATGT,,A,G,1,rs225645591,,,,0,,,,1,0,0,,,
SBB013938682,1,98467067,+,TTATTCCTGCCTGCCTTCCTAGATAACTGTCCATTTCCTTCCCCCCACCC,,C,T,1,,,,,0,,,,1,0,0,,,
gUNC1225138,1,98864978,-,GCTTGACCTTAACTCATTGCAGACCCACAGGACTGCTTCCGTGGAGAAAA,,T,C,1,rs32415736,,,,0,,,,1,0,0,,,
S6J013976867,1,99421675,-,AAGGCATCACAATACCTGGGAATGTAATTACATCTTATTATGAACCACTG,,A,G,1,,,,,0,,,,1,0,0,,,
mUNC1238531,1,99488488,+,GAAATGTTTATTCTATTGCTTCCAGAAAATAAATTTAGCTCATTGGCATC,,G,A,1,rs6281589,,,,0,,,,1,0,0,,,
mUNC010191507,1,99897065,-,GAAATCTGCTGGATCAGTTTTGTGTCTCCCTGTAAGAGTGCTAGGATAAC,,T,C,3,rs46083904,,,,0,,,,1,0,0,,,
gUNCHS001812,1,100264323,+,ATATAAACCCAAGCACAGGAACTTCATGGCTTGTAAATATGGTACCCAAG,,A,C,1,rs47537047,,,,0,,,,1,0,0,,,
mUNC010195425,1,100927997,-,TTGATGGTCAGCCATTCTACCCAAAACTGTAATGCCCAAGTTGAGTTAAG,,A,C,1,rs51911676,,,,0,,,,1,0,0,,,
gJAX00260958,1,101445475,+,AATAAACACTGACTGTTTCTGTGGTCTGAAACAAACATTCACATTTTTTC,,G,A,1,rs46438328,,,,0,,,,1,0,0,,,
B10010101658,1,101658207,-,ACATTCTAATCCTAGCAACAATATAAATGTTTAACACCCAAGAAAACACA,,C,A,1,,C57BL/10,strain group,"C57BL/10ScCr, C57BL/10ScNHsd",0,A,,,1,0,0,,,
gUNC1276993,1,102042988,+,TTAAGATTCATTTTTTTCTGAGGATGTCTCCCTTAATTGGATCACCAATA,,T,G,1,rs31864437,,,,0,,,,1,0,0,,,
DP2014109670,1,102741763,+,ATCCAAAGGATCAGACAAGATCTCCAGGATGTCCTCTTAATGGTTATCTC,,A,C,3,,,,,0,,,,1,0,0,SPIKE,,
SSR014121635,1,103040880,-,CATCATTGGGATTTCAACTACACAACACAAAGCAAAGCTTTATTTGCTTG,,A,G,1,,129S2/SvPasOrlRj,substrain,129S2/SvPasOrlRj,0,G,,,1,0,0,,,
gUNC1296431,1,103143123,-,GCTAGACTTGTATATCAAGAACACTCTGTCTGTAACAAGGCAGAAGCAAG,,C,T,1,rs47371260,,,,0,,,,1,0,0,,,
B10010103626,1,103626725,-,CATTCTGTAATACATCTAGGCAGATAATACTAAGGTGCTGATATTACTTT,,T,C,1,,C57BL/10,strain group,"C57BL/10ScSnJ, C57BL/10SnJ",0,C,,,1,0,0,,,
gUNC1307235,1,103673765,+,GAGTTAGTGAGAACCTAGCTTATGGCTTTTACTTTAGAATCAAAGCACTC,,T,C,1,rs37932227,,,,0,,,,1,0,0,,,
gJAX00261470,1,104282500,-,TATATTCTGCCCCTTTCCCACAAAGTCACAACTTTAAGAGACTTTGCATG,,G,A,1,rs37749850,,,,0,,,,1,0,0,,,
gUNC1321774,1,104826583,+,CTACATGTCTTTTGGGTGTCAGCAGAGTTCAGAAGATAGTAATATATTCT,,C,T,3,rs48839094,,,,0,,,,1,0,0,,,
S2H014199881,1,104997043,-,CAGATTATAATCCAGACAGTAATACAATGTCAAAGAATGAGATCTCTTCC,,T,G,1,rs239464234,,,,0,,,,1,0,0,,,
S6H014218009,1,105450239,-,GTGCAGCTGGAACCTTCAGGGTAAGGGCAAGTACATTTGAGAAAACCCAT,,A,G,1,rs51702182,,,,0,,,,1,0,0,,,
gUNC1330856,1,105481812,-,TTCCTCTGCCTCCCAAATGCTGGGATTAAAGGCGTGTGCCACCACTGCCT,,T,C,3,rs52566384,,,,0,,,,1,0,0,,,
gUNC1335696,1,105911284,+,CATAGGACCAGGAAATCAGTTTCTCAATCCTATCTTCTAGATAAGTCAGG,,A,G,1,rs31615992,,,,0,,,,1,0,0,,,
gJAX00007709,1,106344762,+,TAGAAGATGTCTCTGCTCTCCTGCAGGTGTAGAGTTACAGAAGAAAATGC,,G,A,1,rs30490482,,,,0,,,,1,0,0,,,
B10010106709,1,106709015,-,TTTGCATTACCACTCTCATGTCAGTGGATGAACTACATGAAAGAGCATCA,TTTGCATTACCACTCTCATGTCAGTGGATGAACTACATGAAAGAGCATCT,T,A,2,,C57BL/10,strain group,"C57BL/10ScCr, C57BL/10ScNHsd",0,A,,,1,0,0,,,
mUNC1351738,1,107361906,-,TTAGAAAGATTCTGGTGGTGATAGATGCTCCATGGCTGGAGGTACATTTA,,G,A,1,rs30542166,,,,0,,,,1,0,0,,,
gUNC1359274,1,107852632,+,GAGAAGTGAAAGCTGTCTTCTTTCCATTCAAAGACCTGAGGGCAGTTCAG,,T,C,1,rs30531864,A,strain group,"A/J, A/JCr",0,C,,,1,0,0,,,
gUNCHS001933,1,107972961,-,AATGGGTTGTCGATACATAGAGTTAGCCATGGAGGTATCAAGATCATTGG,,C,T,1,rs6237167,,,,0,,,,1,0,0,,,
mUNC1367316,1,108457079,-,CCCTTCTGGTCACCCTTTCATGATGGAACTGAGACTTGTGGGAAGGGGTT,,T,C,1,rs45957130,,,,0,,,,1,0,0,,,
mUNC1370843,1,108710856,+,CAACTGAAGAATTGTTTCCCTAGATTTCCTGTAGGCAAGACTTTTAGAGC,,C,A,1,rs261689768,,,,0,,,,1,0,0,,,
SFC014379928,1,109498204,-,CAGCCTGAGCAAATCACGTGAAGCAAATCATTAAGCATCACTCTTCCTTG,,C,A,1,rs1134775213,FVB/NCrl,substrain,FVB/NCrl,0,A,,,1,0,0,,,
gUNC1383332,1,109512395,+,TATACCATGCTGAAACCACATTTTATGTAGGGAATTGAACTTTCTTTTCG,,A,G,1,rs214862857,,,,0,,,,1,0,0,,,
gUNC1391068,1,110079486,-,TCTAAGAAAGAGTCTCCATAGTCTTTTTGCTCTACCTGAAAGGTGAAGGC,,C,T,1,rs30549539,,,,0,,,,1,0,0,,,
gICR4115,1,110999793,-,AATGTACCGAGACAACCGGTCACCTTCCTGGTGGGAGCACAGGGGTCCAT,,G,T,3,rs253058291,,,,0,,,,1,0,0,,,
SFH014441791,1,111044785,+,TCCCATCAGTTAGTTTGCTGTCTTTATCTTATTCTATGATAAAAATTGAC,,G,A,1,rs263626350,,,,0,,,,1,0,0,,,
gICR4117,1,111175687,+,CTGGAAGGATTTCTATATTCAACATAAACTGATAAAAGCAGTGGCTTGCT,,C,T,1,rs30898805,,,,0,,,,1,0,0,,,
mUNC010223906,1,112160786,-,TTCTCCAAATCTGACCATATAGTCAGTCACAAAGCAAGCCTTAGTTGATA,,G,A,1,rs31258545,,,,0,,,,1,0,0,,,
gUNC1425647,1,112486389,-,TCTAAAGGTCCCTGGTTCATTCCCAGGTTTCGGCATCATTTGTCGAGTCC,,A,G,1,rs227984491,,,,0,,,,1,0,0,,,
S1H014521214,1,113030367,+,GTTTCCCACATCTGAGGCAGTCTCCTTTTTAGTTTCCTTTAACGTTTCTA,,T,G,1,rs217479071,,,,0,,,,1,0,0,,,
gUNC1438333,1,113219068,-,GTATTATTTCCAAAGTATAGAAGCTCTTATGTTGAGTTTTTACAAGATAC,,C,T,1,rs30590386,,,,0,,,,1,0,0,,,
gJAX00008269,1,113834083,+,TACACACCTAAGATCACAGGTGAGACCACCAATACTGCTCCAATACCTTG,,T,C,1,rs32077457,,,,0,,,,1,0,0,,,
SFR014564465,1,114111632,-,GAAAAAATACAGACACCTCAGAGTGAAAAGCTGGAAAACAATTTTCCACA,,G,T,2,,,,,0,,,,1,0,0,,,
gJAX00263321,1,114455470,+,GAGAGAAGGAAATGTTTAAGAGCTTGCTATGAGACAGGGAGAGCTTGCCA,,A,G,1,rs6322187,,,,0,,,,1,0,0,,,
S3J014580395,1,114509884,-,TATGGACAGATAATAGGTAAAGAGTAGCTAAACAGATGATAGGAAGTAGA,,G,T,1,rs33300573,C3H/HeJ,substrain,C3H/HeJ,0,T,,,1,0,0,,,
D1J014583674,1,114591855,-,TACAGCATGTAGACATGTTCCTCTTCCAGAAACTTAACGGATTAGGTCAT,TACAGCATGTAGACATGTTCCTCTTCCAGAAACTTAACGGATTAGGTCAA,T,A,1,,DBA/1J,substrain,DBA/1J,0,A,,,1,0,0,SPIKE,,
gUNC1469655,1,115134891,+,GCAAAGGAGAATCAGACTTGGGATCCAGAATAAACTTGCTATGTTCTGAA,,G,A,1,rs33323789,,,,0,,,,1,0,0,,,
mUNC010227990,1,115285872,+,CAATCTTTATCTATTGTATTTAAGTTCTTCCTTAACCAGGATGAGAAAAG,,C,T,1,rs46154782,,,,0,,,,1,0,0,,,
SAC014634548,1,115863714,+,CCTTCCACTTTGGCCTCCCAAGTCTCTGTTATTGTAGACATATGCTCCCA,,C,T,1,,A/JCr,substrain,A/JCr,0,T,,,1,0,0,,,
gUNC1486466,1,116183610,+,TGTGGGCAGATCCATCCTTGTAAATGTAAGCAGGACCACTCCCTGAGCTG,,T,G,1,rs262437377,,,,0,,,,1,0,0,,,
UNCHS002030,1,116240354,+,GTAGGTCCTAACCCACCCCACAGTTCTCATGATGGCTGAAAGAACTCTGG,,T,C,1,rs30719471,,,,0,,,,1,0,0,,,
S3J014660712,1,116517813,-,AGTTTGATATCAGAGCAATGGTGTAGAATTATAATCTCAGCACTCCACAG,,A,G,1,rs264718626,C3H/HeJ,substrain,C3H/HeJ,0,G,,,1,0,0,,,
SAC014662171,1,116554280,-,TGTAAATGGTGAATTTCAAAGGAGAAGTGGTGTGGGCTTCTCAAAGAATT,,C,T,1,,A/JCr,substrain,A/JCr,0,T,,,1,0,0,,,
S2J014662298,1,116557469,-,TGCAGTCTGGAGTCTGCATCATCTGCAGCTACAGATCTCTCCTGGGTCTC,,A,G,1,rs265349779,DBA/2J,substrain,DBA/2J,0,G,,,1,0,0,,Consensus,Consensus
S6R014671781,1,116794533,+,GAAAAGCTCCTATAAGTCAAAAGACAGTCAACAGGACAAATTCAATAGGA,,T,C,1,rs31272740,,,,0,,,,1,0,0,,,
gUNC1499687,1,116932003,-,AAAAGGAGCTATAGACATAAGCATCACCATCAGAATATAGGAGATGGAAG,,C,T,3,rs48825200,,,,0,,,,1,0,0,,,
gUNC1502088,1,117117484,+,GTTCTCACAGAAAATGCTATGCCATGATTGTTGAATGCTTGTCAATAGCC,,A,C,1,rs30637126,,,,0,,,,1,0,0,,,
B10010117449,1,117449840,+,GAAAAACTCATAGCTCTGAGTGCCTCCAAAAAGAAAATAGAGAGAGCACA,,C,T,3,,,,,0,,,,1,0,0,,,
gICR4180,1,117749423,-,GTTCTTCCTGGCCGGTCGTGAACACGTGTAAGAGTTGGTGCTGAGACCCG,,T,C,3,rs243875293,,,,0,,,,1,0,0,,,
SBB014746527,1,118663187,+,AGTAGAGGAAATGCTGAGTTTGACCTTCAGCACCTGGTGTGGTGGTGCCT,,G,A,1,,BALB/c,strain group,"BALB/cByJ, BALB/cByJRj",0,A,,,1,0,0,,,
mbackupUNC010236642,1,118715542,-,TGCAGAATAACTGATGTCCACATGCGTGTACATACTCTCATACCCACTCA,,A,G,1,rs32455055,,,,0,,,,1,0,0,,,
S2C014755825,1,118895637,+,AGTTGTTGGAAGAGTGCACAGGGCTGGGCTGGAGCCAGTGTGAGCCACTC,,C,T,1,,,,,0,,,,1,0,0,,,
gUNC1524644,1,119376212,-,GTTCAAGGCCAGCCTGGTATACTTAGAAAACTTTAAGACAGCCAGAACTA,,A,G,1,rs45838338,,,,0,,,,1,0,0,,,
SAJ014776682,1,119417051,+,CTGCTCACCCCATTCTTTCAGACTGACAGGCATTGGTGCCATTTGTCACC,,G,A,1,rs30686554,A/J,substrain,A/J,0,A,,,1,0,0,,CC,CC
UNC1525238,1,119435727,+,CCTCCATCATTATCCCTCTGGGTATTCCTCTTTATGGGGGTGGGGGAGGT,,C,T,1,rs32511174,,,,0,,,,1,0,0,,,
gUNCHS002088,1,119681797,+,ATTATCTAAGGCCAAAAGGAGGAGCTGTATGGCAACTTATATCACTCTCT,,G,T,1,rs30688641,,,,0,,,,1,0,0,,,
gUNC1535912,1,120403934,-,CGTGCCACCAGACAGAAGAACTGGTAAGGCTGAGTGAGCCCAAACCCTAT,,A,C,4,rs30746754,,,,0,,,,1,0,0,,,
S2R014821471,1,120536779,-,CTCCAGCTCCTACAAAGATAGCGGCCTTTTGGTAATCCAGTAACATCTTC,,C,T,1,rs30739886,DBA/2,strain group,"DBA/2J, DBA/2JRj",0,T,,,1,0,0,,,
gUNC1545055,1,121063201,+,ACTATATGCATTTCCACTGGGTTCCTTCTGATTCTTGATTTTGGTCCAAG,,A,G,1,rs50762493,,,,0,,,,1,0,0,,,
gUNC1547605,1,121248927,-,TACAAATTATAATATGTAACATTAGATTATATGTGTATATAATATGTAAT,,C,T,1,rs6255572,,,,0,,,,1,0,0,,,
S3T014861944,1,121548612,-,CTTGACCTCATCCTCGTAGCATGTATTTGAGCATCTGAGAAGAGTCAGGG,,C,T,1,,C3H/HeNTac,substrain,C3H/HeNTac,0,T,,,1,0,0,,,
gUNC1557877,1,121976493,+,GGAATGGTGGACAGTGTTGCCCTAAATCAACTAGTAGTCAAGGTAGTCCT,,C,A,1,rs51153414,,,,0,,,,1,0,0,,,
SBH014883089,1,122077239,-,AAGAAAATGTGGGGCTGTCAATGAAAAATGGAAAGAGGTAGAGGCAAATA,,T,G,1,,BALB/cAnNHsd,substrain,BALB/cAnNHsd,0,G,,,1,0,0,,,
S3T014884078,1,122101964,-,AGCCTGCAGACCAAGCATTCCAATCCTGAGCCTGTGTGGGGGAGCATTTC,,T,C,1,,C3H/HeNTac,substrain,C3H/HeNTac,0,C,,,1,0,0,,,
S3R014896634,1,122415855,-,ACCATCCCAGATTTCAAGTTCTACATGGAGCTATAGTAGTAATAAAAGCA,,A,G,2,,C3H/HeNRj,substrain,C3H/HeNRj,0,G,,,1,0,0,,,
gUNC1565720,1,122634011,+,GTTAGGTACAGTCCCTGGGTGTTCATAATCTCACTGGTAACAAAAAGGGG,,A,G,1,rs36335830,,,,0,,,,1,0,0,,,
gUNCHS002157,1,123301336,-,TAGTTCAATCCATTTGACACTGGCCTCAAACTAGACCACACCTACAGATG,,T,C,1,rs32160773,,,,0,,,,1,0,0,,,
SBB014938916,1,123472923,-,TATTATATATGTATGTGCTGTGAGTCTAATATAGATCCCATGATTCTTTT,,A,G,1,,BALB/c,strain group,"BALB/cByJ, BALB/cByJRj",0,G,,,1,0,0,,,
gJAX00265277,1,123954277,+,CTCTGTGAAGTAAAAGGAGACTGGCACAACACAGAAGGCAAACAGAATAT,,T,C,3,rs36257418,,,,0,,,,1,0,0,,,
S3J014978084,1,124452119,+,ATGTTGGGCCCTTGAGCATCTTCATTCACATAGCCACTTCTCCTTTTAGC,,G,A,3,rs237994702,,,,0,,,,1,0,0,,,
gUNC1593484,1,124548738,-,CACACGTTTCAAGGACCAATCTCCAGGTCTCATTTGTCTGAACACACTAC,,C,T,1,rs31748095,,,,0,,,,1,0,0,,,
SFT014982180,1,124554513,+,GTAGAAAATTGTTGTATAGAATCATAGAACTAAATCTGCAGAAATGCATG,,T,C,1,rs30552249,,,,0,,,,1,0,0,,,
D2H014992652,1,124816319,+,CATAAACGGAGGTTATTGCCTCAGCACGTCAAAGTTTAGGCTGTGTATGT,CATAAACGGAGGTTATTGCCTCAGCACGTCAAAGTTTAGGCTGTGTATGA,A,T,2,,DBA/2JOlaHsd,substrain,DBA/2JOlaHsd,0,T,,,1,0,0,SPIKE,,
gUNC1605568,1,125334698,+,GTTTATAATCAGAAAATCATGAGGAACTTCAGCTGGGTGGGGTGTTGCGG,,G,A,3,rs242344173,,,,0,,,,1,0,0,,,
DS4015015500,1,125387513,-,ACACCCATTTGCTTTCCCTATCCTATTTTCCACTTTGACAGGTTTTGTGT,,C,T,3,,,,,0,,,,1,0,0,SPIKE,,
gUNCHS002197,1,125765595,+,TAACAGCTGGATTCTCAAGTCTTTGTTCTATCAATAAGCACACTGGCCCT,,C,T,1,rs260182743,,,,0,,,,1,0,0,,,
S3J015032419,1,125810476,+,TCTCTGCAGGTTCTTTATTTTGTCAGGTCTCATAATGTTTTGCCATAAGA,,C,T,1,rs228073657,C3H/HeJ,substrain,C3H/HeJ,0,T,,,1,0,0,,,
S6R015034070,1,125851763,+,CCAGTAAGGAAGATATTAATTTCCCAATTTCAAAATCAATGAAAACAAGG,,A,G,1,rs48307267,,,,0,,,,1,0,0,,,
SFT015035681,1,125892040,-,AGATATACATTCAAATTAGCATCTTCCAATCAGCCAGTTTCCCCATCACA,,C,T,1,rs30802677,,,,0,,,,1,0,0,,,
B10010126340,1,126340811,+,TGTATAAGTGGATCTACTGCACATGCGCATAGATACGTGTAAAGGACAGA,,A,G,1,,,,,0,,,,1,0,0,,,
gUNC1620550,1,126353960,+,AAACAAGAGTATACCGGTGCCTGCATTCAAGCAGACACTCAGAGTTTCTG,,C,T,1,rs30788889,,,,0,,,,1,0,0,,,
SS1015055968,1,126399207,+,AATAAAACCAGAAAATGTTATCAGGGTGATAGGATTTGCCTCTGAAAGTG,,G,A,1,rs30786035,129S1/SvImJ,substrain,129S1/SvImJ,0,A,,,1,0,0,,CC,CC
S6J015057187,1,126429683,-,CCTTCTATTGTCCTCCTTCCCCTCTCACCAACCCCCATCTGTTATTAGAC,,T,C,3,rs222065992,,,,0,,,,1,0,0,,,
SBR015062003,1,126550096,-,TCAAAAGGCAAGATAAGTAAGTGACTGAAGTAAACACCCAAGGTTGTCCT,,A,G,1,,BALB/c,strain group,"BALB/cByJ, BALB/cByJRj",0,G,,,1,0,0,,,
SFJ015076714,1,126917851,-,TCATGGTGGTGGCTAGACTAAGGCTTGATCTCTATCCGCTAAGGTTTGAG,,C,A,1,rs33411444,FVB/NJ,substrain,FVB/NJ,0,A,,,1,0,0,,,
mUNC010261606,1,127006951,+,TTAATGTGGCAAGCATGGGCCATTCCTGATCACCCCACCATTCTACACAA,,A,G,1,rs32593760,,,,0,,,,1,0,0,,,
S3T015094055,1,127351375,+,AGCTCACTTTCTCTTTTTTGTTTTGTCCAAGACCCCAGCCCATGGGGTGA,,C,T,1,,,,,0,,,,1,0,0,,,
SBJ015098159,1,127453984,+,GCGGGAAGGTGGAACAGCTGGTCACATGGTATCCGTTGAGGCTTAAATGC,,A,G,1,rs243416487,BALB/cJ,substrain,BALB/cJ,0,G,,,1,0,0,,,
gUNC1635382,1,127477857,-,TCACTGGAATTATAGGCAATTATAAGCTGTCTGGTGTGGATTTTAGAAAT,,A,G,1,rs46970564,,,,0,,,,1,0,0,,,
gUNC1641373,1,127920237,+,CCCCCACCATGTGCTGGGCCTTCCCCTAGTGATCACTAGTTGAGAAAATG,,C,A,3,rs32669214,,,,0,,,,1,0,0,,,
gUNC1648713,1,128627956,+,CCTTCCTTATGTGTCCCCAAGATGACATGTTAATGTTAATACTACAATAT,,A,G,1,rs46984594,,,,0,,,,1,0,0,,,
mJAX00266494,1,129134427,+,TTTTATGCTTTCCTGATCCTGTTTCAGGCCTTTATCTATCTTCAAATTGC,,T,C,1,rs36385537,,,,0,,,,1,0,0,,,
B10010129302,1,129302339,+,TACCCTGTCTCTGGGTTACCTAGTCTTTCTGATCATCCAGATAATCTTGG,,G,A,1,,C57BL/10,strain group,"C57BL/10ScCr, C57BL/10ScNHsd",0,A,,,1,0,0,,,
SBC015186935,1,129673386,+,CTGATAGAATAAACTGTTACAGAAATTATCTTTATATGTCTCTTGTTCTC,,C,T,1,,BALB/c,strain group,"BALB/cAnNCrl, BALB/cAnNHsd",0,T,,,1,0,0,,,
mbackupJAX00266606,1,129809947,+,CAGCTAAGGAACTGTTTGAAAGGAAGCATGAAACCATGAGCTATGATTAG,,G,T,1,rs50080462,,,,0,,,,1,0,0,,,
S2C015197728,1,129943219,+,CACTGAAAGTACACCCTTCGGTGCCTGGGCAGGTTCATCAGGTCAGAATA,,C,T,1,rs263324469,,,,0,,,,1,0,0,,,
mbackupUNC010803792,1,130593230,+,CACTCCTCACCAACTCAAGGGCTGAGAAAGCAATCCTATAGTATCCAAAG,,C,T,1,,,,,0,,,,1,0,0,,,
gUNC1675521,1,130878269,-,GCGCCGGGGGCAGGCGCTGTAGACGTTGTTCTGCGAGCGCGGCCTCTGCG,,T,C,1,rs3689028,,,,0,,,,1,0,0,,,
S2C015252499,1,131312498,+,TAAGACAGAGATTTGTTACGTTCCCCAGACTCATTGTCTTCCTGCCTTGG,,C,T,1,,DBA/2NCrl,substrain,DBA/2NCrl,0,T,,,1,0,0,,,
gUNC1681036,1,131402231,+,AGGGCTAAAGGGAAAAGAACACAAAGAGGAAAAATAAATAAATAAAGGAA,,A,G,1,rs256902135,,,,0,,,,1,0,0,,,
SBJ015276763,1,131919088,-,ACAGAGACTCCTAAAAGCATGCCATAAAGCACATAAGCCTGCCAGCACAG,,G,A,1,rs259201709,BALB/cJ,substrain,BALB/cJ,0,A,,,1,0,0,,,
mUNC1695463,1,132520960,+,AGAAGCTTCCCCTCCTGAGGCTCCTCCCCCCACAATGCTGGAGCTCCTCC,,T,C,1,rs50616012,,,,0,,,,1,0,0,,,
SFT015311457,1,132786434,+,CCCCTCTGCAAACATGATCATCGGGGATTCACAGGATCCAGTTGTGATGG,,C,T,1,rs3713478,,,,0,,,,1,0,0,,,
gUNCHS002391,1,133055667,+,TCAGACACACCAGAAAAGGGCATCAGATCTCATTATGAGATGGTTGTGAG,,C,T,4,rs245776551,,,,0,,,,1,0,0,,,
D1H015333995,1,133349896,-,AGCTTAGACAGAGTCTAATGAGGAACTGTGCTGTTCAAGCATGAGGTCAG,,C,T,1,,,,,0,,,,1,0,0,SPIKE,,
gUNC1706873,1,133403330,-,ACGAGATTTCTGTATATGCAGAGTGGTTTTTCTCTGTGTATATGTTTCTT,,C,T,1,,,,,0,,,,1,0,0,,,
S2T015346026,1,133650656,-,GAGTGAGCTCCCCACTCACCTGTCTTCTAGCTTCTACCTGGCCCCATTTC,,C,T,1,,DBA/2,strain group,"DBA/2NCrl, DBA/2NTac",0,T,,,1,0,0,,,
SSR015376421,1,134410528,+,CCATTTGCATTTCAGACTGAAAGGGATATAATCCTGCGGGAGGACCTAGA,,G,A,1,,129S2/SvPasOrlRj,substrain,129S2/SvPasOrlRj,0,A,,,1,0,0,,,
S6T015381026,1,134525658,+,ACAGATTACCTGTAATCAGGGTTGCCTGATCGACCCCCAGAAGGGTTTTG,,T,C,1,rs3695023,,,,0,,,,1,0,0,,,
SBJ015389798,1,134744953,+,TTCTCAGTGTTTGGCTTATCTTCTAGCTACAGCAACCAACCCCTCATCTG,,C,T,1,rs225826724,BALB/cJ,substrain,BALB/cJ,0,T,,,1,0,0,,,
gUNCHS002460,1,134859002,-,TGTAGCCCAGAATATAGAACTAATCGCTACCCTCCATGTTTTGGGTTGAC,,T,G,1,rs47726447,,,,0,,,,1,0,0,,,
S2T015397164,1,134929104,+,CTAAGTCCCAGAAGTACTTGCTGCTCAATCATAAAGGCCTGAGTAAAAAG,,C,T,1,,DBA/2NTac,substrain,DBA/2NTac,0,T,,,1,0,0,,,
SNJ015409517,1,135237939,-,TATGTGTGTTTGTATGTGTATATATGTGCATGTGTATGTATATGTGTGTG,,A,G,3,,,,,0,,,,1,0,0,,,
DP3015410305,1,135257635,+,TGTCTGTAAAGATTTTACACAGCACTCACCTGGACCTTCCAGTGTCATCA,TGTCTGTAAAGATTTTACACAGCACTCACCTGGACCTTCCAGTGTCATCT,T,A,2,,129P3/J,substrain,129P3/J,0,A,,,1,0,0,SPIKE,,
gUNC1733690,1,135464050,-,CTCTGAGGAGCCAGGGCCAGGGGGACTCTCCTCTCTGCATCTGTCAATCA,,A,G,1,rs36415447,,,,0,,,,1,0,0,,,
DFH015422324,1,135558102,+,ACGGGTGAGCATTTACAAGCCTGCAAGGAGCTGAAAGGTTTCTGTTAATG,,G,A,1,,FVB/NHsd,substrain,FVB/NHsd,0,A,,,1,0,0,SPIKE,,
S6Y015422817,1,135570442,-,GGCCCTCCTCCTGGTCTCCCTGTCTTTAAGAATCATAATTCCTCAATACT,,A,G,1,rs32497418,,,,0,,,,1,0,0,,,
gUNC1739568,1,135816613,+,ATCTTAAGCATGCATAGGAAAACCATCCCATGCAGGGCTGGTATTATCTG,,C,T,1,rs49413315,,,,0,,,,1,0,0,,,
SBJ015444437,1,136110926,+,AAGCACCTGGATGTGGTGACCCTGCTGAGGAGGATTCAGCCCCCTCTGGG,,C,T,1,rs237526233,BALB/cJ,substrain,BALB/cJ,0,T,,,1,0,0,,,
S6J015452108,1,136302702,+,GGCTTGAGAGAGGGGGCTATGGAACTACAGAGTTCTCAAAAGAAGAAGTA,,T,C,1,rs45707897,C57BL/6J,substrain,"C57BL/6J, C57BL/6JEiJ",0,T,,,1,0,0,,E2,E3
gUNC1750242,1,136512301,-,CTCTCTTGAAAAATATGATATCACTGAATTACAGAAGTTCTCCGAGTGTC,,C,T,1,rs33591243,,,,0,,,,1,0,0,,,
SAJ015471665,1,136791628,-,ACTCTCCACTCTTGGGCTATAATTAGGTAATATCCATTAAACAACAGTTG,,G,A,1,rs33576929,A,strain group,"A/J, A/JCr",0,A,,,1,0,0,,,
gUNC1761545,1,137336720,-,GAGGGCAAAACAAAATATATTGTAGTTTTTGTAAGAATTTAAATAGACAC,,A,G,1,rs38944631,,,,0,,,,1,0,0,,,
DSR015494438,1,137360964,+,CTGTATTTGGTGATAAATGCAAGGGCACTGAAGACATGCCTCGGGTTGAC,,A,G,2,,129S2/SvPasOrlRj,substrain,129S2/SvPasOrlRj,0,G,,,1,0,0,SPIKE,,
gUNC1767179,1,137780191,-,TTTACACCAGCAAAAGACTGAAGGTGAGGAGGTCTCACACTCAGAGGGTC,,T,C,1,rs33615501,,,,0,,,,1,0,0,,,
gUNC1770327,1,138006890,+,GATTTGGGAGTTCATGTGCTCAGGGCTCCACATAGTTTATTTGTCCTGAT,,A,G,1,rs33609311,,,,0,,,,1,0,0,,,
SFH015526372,1,138159305,-,CCTGGACCTGGTACCTGTTGCTTGAAGATGAAGGCCTGATATAAAGGCAG,,A,G,1,rs33606582,,,,0,,,,1,0,0,,,
SBH015540899,1,138522492,-,CCTGTCTCCACCTCATAGATTTTGAATTACAGGGACCACGCCAGCCAGTT,,A,G,1,,BALB/cAnNHsd,substrain,BALB/cAnNHsd,0,G,,,1,0,0,,,
S3J015545736,1,138643421,-,TGTGCAATTCCAGTGGATAAGTGCTTATACACTGGTAGGACAATATTGAG,,T,C,1,rs246646145,C3H/HeJ,substrain,C3H/HeJ,0,C,,,1,0,0,,,
S2H015556503,1,138912597,-,TCCTTTTACTGATTATGATATTGTCCTTCAGAGTCAGGTCTCACCAAGTC,,T,C,1,rs30931076,,,,0,,,,1,0,0,,,
gUNC1783074,1,139096750,+,TTCTTTCATCCAAAACCGAATTGTCAGACCCGAAAACACATGTACACGTA,,A,G,1,rs31148113,,,,0,,,,1,0,0,,,
gbackupJAX00269153,1,139478830,+,GTTTTTAGAGGCCACAGTCAGAGGATGAAATACCAGACTATGCTTCAGTC,,T,C,1,rs31550756,,,,0,,,,1,0,0,,,
SSH015583893,1,139597340,+,CTTGTCTGGCCTCAGAGGGAGTGGTGGAGCCTTTATAGACTTGATGCCAC,,G,A,1,rs48406798,,,,0,,,,1,0,0,,,
mUNC010292027,1,140294459,+,TGTTCCATGCTACTTTATGAATCCCTGGCATGCAAAAATCTAAGAGCCAC,,C,A,1,rs31473818,,,,0,,,,1,0,0,,,
gUNCHS002581,1,140709872,+,TATATATCCTTTTGTTGTTTGAAAATTACCTCAGCCCTTCCGCTCGACTC,,G,A,3,rs241948896,,,,0,,,,1,0,0,,,
gUNC1806326,1,141114407,+,AAGTGTGAGCACTCACTTGGAGTTTGGGTCTCAAGTTTTCTCAGTCATTG,,T,C,1,rs250293734,,,,0,,,,1,0,0,,,
gUNC1823389,1,142140565,-,TAACATTATGCCACTATTAAATCGGAGTTTTATATTTTAATGAACGAGAT,,G,T,1,rs49397735,,,,0,,,,1,0,0,,,
gUNC1825459,1,142266250,-,TCTCAGTGTGAGAGCCTTCATCCCATGGGCCCTGATAATGTACTGGATAA,,C,T,1,rs49282703,,,,0,,,,1,0,0,,,
SFT015716951,1,142923794,-,TGGACACCACACCTCCTTTTCAGAGCCATTAATCACCTGAGTTCAAATGT,,G,A,1,rs32232360,,,,0,,,,1,0,0,,,
DSB015742401,1,143560049,-,TGGCACGTCTGTATACACAGCCCCAAATGAAATAATCTTACCAGGTATTA,,C,A,3,,,,,0,,,,1,0,0,SPIKE,,
mUNC010463165,1,144549292,-,CAGGGGACAGTTGTAGGCTCCTGTCTGTAAGCATAAAAGAGGGTGTGTGT,,A,C,1,rs48068526,,,,0,,,,1,0,0,,,
gUNC010300060,1,144629784,+,TCACATGTTTTAGCATCATGCTAACCCTCAAGTACTACAAGTTATATATT,,C,T,1,rs32781333,,,,0,,,,1,0,0,,,
DAH015809028,1,145225720,-,GAGTGTATGTGGAGGTAAGAAGAGTTTTAGGATACTTGGGCTTCTCTCTG,,C,T,1,,A/JOlaHsd,substrain,A/JOlaHsd,0,T,,,1,0,0,SPIKE,,
mbackupUNC010301903,1,145394499,+,TGGCATCAGGTTCATGTTTGTGTTCCTCTCTCTTGTATTTCTGATGTGAG,,A,G,1,rs31055515,,,,0,,,,1,0,0,,,
S2H015820588,1,145514710,+,AAGTACTTTGGGTGGTCAGTAGTTGAGAAAAGGGCCAGGTGTTGGGTTTG,,G,A,1,rs31041484,,,,0,,,,1,0,0,,,
SBT015826555,1,145663886,-,TAGTCTGGAAAACAAGGAGATCTTGTCTTGAAATCGCAAAGCATTACAAC,,C,T,1,rs582857198,,,,0,,,,1,0,0,,,
SBH015835970,1,145899268,+,CTTAATTTTGTCGAAAATTTTCAAAAATCAAAAGGATATGATCCCTAGTG,,T,G,1,,BALB/cAnNHsd,substrain,BALB/cAnNHsd,0,G,,,1,0,0,,,
B10010146154,1,146154604,-,AAAGAACAAATACATCCTACAGCCACTGAAGCTTAATATGCTCTAAGCAA,,G,T,1,,C57BL/10,strain group,"C57BL/10ScCr, C57BL/10ScNHsd",0,T,,,1,0,0,,,
gUNC1872920,1,146189462,-,TTAAGGTAAAATGTGAGAAATATACCAAGATGGGAAATAGATATACTGGC,,G,A,1,rs31022786,,,,0,,,,1,0,0,,,
S2H015862651,1,146566292,+,ATGTTAAATTTGGTGGCTCTTCACAATAGATCATGTAACAATCTTGATTA,,C,T,1,rs32109876,,,,0,,,,1,0,0,,,
gJAX00010715,1,146782668,+,TTTTACAAAAATGGGGCCCAAAGTACAAAGTGAAAATCAGTTAGCTATGG,,G,A,1,rs31190083,,,,0,,,,1,0,0,,,
SAH015874750,1,146868763,-,ACTGCTAAAGAGTTACAAGTCCTTAGAGAAAAACAGGAAAACACAAACAG,,C,T,2,,,,,0,,,,1,0,0,,,
gUNC1886404,1,147258865,-,CTGTAGCTGTATTCAGACACAACTGAAGAGTGCATAAGACTCCATTTCTG,,T,C,1,rs32613272,,,,0,,,,1,0,0,,,
gJAX00270549,1,147699660,+,TCTTTACCTCTGAGTGTGTCAGCAGTCCTCTATATGCATGTCTACCACTT,,T,C,1,rs46446483,,,,0,,,,1,0,0,,,
gB6_01-150177251-S,1,148330121,+,TTAAATAGTTCTCCTTTCCTGTGCTGTTTGTGAGAGCTGAGCATAGACTA,,C,T,1,rs235527027,C57BL/6,strain group,"C57BL/6NJ, C57BL/6NRj, C57BL/6NTac",0,T,,,1,0,0,,,
gUNCHS002697,1,148717254,+,TTGGTTCTATTGTGTCTCCCACAGGCTAATGTTTGAATTGCTTTTCTCCA,,A,G,1,rs32605009,,,,0,,,,1,0,0,,,
gUNCHS002702,1,149037613,-,TGGTCACAATGGATGGAGGCAAAAATTCCTCAGTAGACAATTTTGGTCAG,,A,G,1,rs31111966,,,,0,,,,1,0,0,,,
S3J015969237,1,149230938,-,TCCTTCTATCTTGTTACTGAAAAGTTTTCTTATGAAGTCAAAGGGCAGGA,,G,A,1,rs31091714,C3H/HeJ,substrain,C3H/HeJ,0,A,,,1,0,0,,,
gUNC1917999,1,149617805,+,CGGGCTTTTGCAGCAAAGAACACTTGAGATCAGTGTGACTTTGCTTTATG,,C,A,1,rs32720367,,,,0,,,,1,0,0,,,
SFJ015992576,1,149814419,-,AACTATTTTATGGCTTATCATAAATATTAGCTCTCAAAGAACAATGCATA,,A,G,1,rs386908118,FVB/NJ,substrain,FVB/NJ,0,G,,,1,0,0,,,
S6H016000712,1,150017812,-,GTTGTTTCATGCTGTATTAACTTTTTCTTCTACAAATTTTGATTTGCCTT,,A,C,2,,C57BL/6JOlaHsd,substrain,C57BL/6JOlaHsd,0,C,,,1,0,0,,,
gUNCHS002717,1,150285042,-,ATCCTTCCCTGTCGGTTGACTCTCCTCTGGCAAGAAAGGTGCCCAGGGGT,,A,G,3,rs234704738,,,,0,,,,1,0,0,,,
SBB016016481,1,150412035,+,CAAATAAAAGACCTTTCGCAACAGGTTAGGACATTTTGTGTGATTTCCAG,,T,C,1,,BALB/cByJ,substrain,BALB/cByJ,0,C,,,1,0,0,,,
SBJ016017430,1,150435769,+,TAATGTTCAGCCCTCCATTTCTCAGCCCATCCTAACTGTACAGCAGCAAA,,C,A,1,rs237524223,BALB/cJ,substrain,BALB/cJ,0,A,,,1,0,0,,,
D6Y016025239,1,150630979,+,GAAAAGGACGCACACAGTGGGAAGGTGCATAGCACTCAGAGTTATGCCTG,,C,T,1,,,,,0,,,,1,0,0,SPIKE,,
backupUNC010628673,1,151111612,+,GTGAGAGAATCTTCCTCCAGCCTCCCCAGACCATTTCTTAGACTCTTTTC,,A,C,1,rs32513914,,,,0,,,,1,0,0,,,
gUNC1940721,1,151155081,+,GCTTCTACAGTGTTGTTGTCCAGCTGAATGCTTCCTGTCACTATGTCTGT,,T,C,1,rs31116552,,,,0,,,,1,0,0,,,
gUNC1944082,1,151418631,+,TAATATCACAAAAGAGGACAGCACCGTGTTGTCACATGTCCCAGATTCTG,,A,G,1,rs47550601,,,,0,,,,1,0,0,,,
DP2016063842,1,151596064,-,TTAGGTAGACAAAGCACATAGTGACAGAGGGCAAAGCTCGTTGCAGGATA,TTAGGTAGACAAAGCACATAGTGACAGAGGGCAAAGCTCGTTGCAGGATT,T,A,2,,129P2/OlaHsd,substrain,129P2/OlaHsd,0,A,,,1,0,0,SPIKE,,
S6T016074459,1,151861494,+,TGGAGGCAGGCAAAGGTCTTCACTCTGAGAGCCTGCCCTGGGAGTCATTA,,C,A,1,,C57BL/6JBomTac,substrain,C57BL/6JBomTac,0,A,,,1,0,0,,,
mUNC010317552,1,152348058,+,CAATGTTTATTAAGCACACTTATTAGGTGATGGTATGCTAGCTGCCTCCA,,G,A,3,rs31214664,,,,0,,,,1,0,0,,,
gUNC1962782,1,152618258,-,AAAAGCCCCCTGGAGTTTAAAATTGGGAAAGTAAAGGAGAGGTAAGTGGA,,C,T,1,rs31182773,,,,0,,,,1,0,0,,,
SAJ016114377,1,152859436,-,GTTGGCTATCTTAGCTTCTTCCAAAGGAGACCACCTGACCACAATTTTCT,,T,C,1,rs32795566,A,strain group,"A/J, A/JCr",0,C,,,1,0,0,,,
gUNC1973125,1,153285376,-,GACCATTCAGTCAAGTGTACTTAATGAAACCCTGATAAAAACCAGCTGTC,,T,C,1,rs46617561,,,,0,,,,1,0,0,,,
SFC016133146,1,153328652,-,GAGTAATCGGTATTGATTACTTGGTTGCTATTTAAAAGTGTAGCATTTAC,,T,C,1,rs30952008,,,,0,,,,1,0,0,,,
SAC016136476,1,153411902,+,TGGTATACATACATACTCAGGTTAAAACACACAATCACTCACCCCCCCCC,,A,C,3,,,,,0,,,,1,0,0,,,
gUNC1978827,1,153744607,+,GCCTTCACCTTTGCAGCAGGGTCTGCTTGTGAACAGGGCTAACTGAGAAG,,T,G,1,rs246827811,,,,0,,,,1,0,0,,,
SFT016154602,1,153865066,-,TCTGGGAGAGTATGTTCTGCTCTTTGATAATGGCTCTGTGTTATTCCCTT,,T,G,1,rs47092887,,,,0,,,,1,0,0,,,
mUNC1988150,1,154519779,+,TCAAAATATATTGTATAAATCAATGAACATTTCAAACAACAACAACAAAG,,T,C,1,rs49473947,,,,0,,,,1,0,0,,,
gJAX00272285,1,155043259,-,ATATAGAGGGTTTCAAACACAAAGTGTTCATATCCTCAGGATGTCTTGGC,,G,A,3,rs33694478,,,,0,,,,1,0,0,,,
S1H016201835,1,155045889,-,CAGACATGGGTCACCACGATCCACTTTGTCATAGGTCTCATGTTGTGTTG,,T,C,1,rs32214405,,,,0,,,,1,0,0,,,
B10010155167,1,155167851,-,GCACCTACTTCCCAACATAAGAAGCAAATGAAACAGTGCCTACACTGGGG,,G,A,1,,C57BL/10,strain group,"C57BL/10ScCr, C57BL/10ScNHsd",0,A,,,1,0,0,,,
S3T016213867,1,155346679,+,AATGAAATGTCATTTCCCTAAGAAACATGATACATACACAACACATACAC,,A,C,2,,C3H/HeNTac,substrain,C3H/HeNTac,1,C,,,1,0,0,,,
SNJ016232363,1,155809090,-,CATAGTTTCAGATGCTTGTGAGCTGCCGTATCAGTGCTGAGAACCAAACC,,G,A,1,rs251721743,NOD/ShiLtJ,substrain,NOD/ShiLtJ,0,A,,,1,0,0,,CC,CC
gJAX00272462,1,155985673,-,ACCTAGGATATTATTGCAGGAATGTACATCTGAAAGTCACTTCTAATCTT,,A,G,1,rs33692225,,,,0,,,,1,0,0,,,
S2J016268868,1,156721710,-,CACCTGGCCACATGGCACCTGCCATTCTCACACTTCTCTTTCAAGGGGCA,,A,G,1,rs45828239,DBA/2J,substrain,DBA/2J,0,G,,,1,0,0,,E3,Consensus
gUNC2018619,1,157132066,+,AGCAAGAATAGACAGCCATGAACATCTGTATAGTAGATTTATAAAGAGGG,,A,G,1,rs31564390,,,,0,,,,1,0,0,,,
SBC016294471,1,157361776,-,AATAAAGTACATTTGTAATCTTCATCTTTCTTCATCTTGATGCAGAGGCA,,A,G,1,rs584721077,,,,0,,,,1,0,0,,,
mUNC010905835,1,157672910,+,AAACAGAAAAGAGACAAAAATGCCCACCAAAGCACTAACATCCACAAAAG,,C,T,1,rs32460758,,,,0,,,,1,0,0,,,
S2R016319640,1,157991005,+,TGAGCATCAGAAAAGTTTACTGAGGAATGTAAATGTTCTAAAGCTAGAGC,,A,G,1,rs252746656,,,,0,,,,1,0,0,,,
S1H016331722,1,158293068,+,GTTCATGTGCAATAACTGACCCCAGAAAGACTGAACAGCACAGTGGAAGA,,A,G,1,rs46610983,,,,0,,,,1,0,0,,,
gUNC2032620,1,158295053,+,CCCTTCCTTCATTTGCATGACTAAGTAATTACAAAAGTCCCTAACCCATT,,C,A,1,rs48531235,,,,0,,,,1,0,0,,,
S2H016332934,1,158323360,-,AGGAGAACAAAAACCTGGCAGATGGCATTTTGCTGATTTGTTGCTTCTTT,,A,C,1,rs33744686,,,,0,,,,1,0,0,,,
gUNC2036998,1,158663689,+,GGATGGGCCTCACACTTGTGTCTAACTGACTTCTAACTTCTGATCCTCCT,,A,G,1,rs3660381,,,,0,,,,1,0,0,,,
S2R016348703,1,158717589,+,CTACTTCTCTTCATTTTTATGCCTGTCTCTTGGTTTTGCTGAAGCCTGGC,,G,A,1,rs30763128,,,,0,,,,1,0,0,,,
S6J016375332,1,159383312,+,CCATGTTGTTTCTTAGGTGCCTCTAGGTCCTGTCTGATTATTAATGCATA,,C,T,1,,C57BL/6J,substrain,C57BL/6J,0,T,,,1,0,0,,CC,Consensus
gUNCHS002944,1,159436845,+,GCCTCATAGGAGACAGCTATATCAGGCTCTTGTCAGCAAGCTCTTGGCAT,,T,C,3,rs266104133,,,,0,,,,1,0,0,,,
S2R016389721,1,159743033,-,TGACATACATGCCAACGGATAAGTCTACATGAGCTTTTCCAACATAGACA,,A,G,1,rs31296226,,,,0,,,,1,0,0,,,
gUNC2050462,1,159835806,-,TTCACTCTCTGAAAAGAAGTGTAGTCCCTGTCTTTTATGAAGTCATTTAC,,A,G,1,rs30619470,,,,0,,,,1,0,0,,,
S2H016394469,1,159861726,-,AAGATTATGTTTTACATCTCTGACCTTCAGAGGCTGAAGCCCATAGGCTA,,C,T,1,rs31282093,,,,0,,,,1,0,0,,,
S1J016408998,1,160224951,-,ACATAGTCACCGTGGTTGGCAGATCTGAAAATGACAGACCCAAGCCCTCA,,A,G,1,rs31349041,,,,0,,,,1,0,0,,,
S2T016409979,1,160249477,+,AGTTCATGGGTAATATATAGAAACAAAGCCTCCTGCCGGGAGGTGGTGGC,,A,G,1,rs31429262,,,,0,,,,1,0,0,,,
S2T016417509,1,160437728,-,ACTGCAGAGATCCTTTACCTCACTGGTAAGGCTTAGTTCTGTATCTGCAT,,C,T,1,rs46397410,,,,0,,,,1,0,0,,,
mJAX00273510,1,160737074,+,GGAGAGTCACAGTCTCAAACTATCAAAGGAAAGGAAAGCTGAGCATGCAG,,G,A,1,rs31322021,,,,0,,,,1,0,0,,,
S6J016433395,1,160834897,-,AGCAGAGACTGGATCCTCACCACACAATGAGCCTGTCAGTTCCTTGATTT,,C,A,1,,C57BL/6J,substrain,C57BL/6J,0,A,,,1,0,0,,CC,Consensus
gUNC2061568,1,161113306,+,TTCTACTGTATCTTAAGATTTCTTTTCTCTCCTCATCAAGTCTAATGCTT,,G,A,1,rs31449746,,,,0,,,,1,0,0,,,
S3C016445465,1,161136639,+,ATAGCAGCATCTCCAAGCATCTAGCTGGTCTATTAAGAGCCACTACTGAG,,C,T,1,rs49905118,,,,0,,,,1,0,0,,,
DX1023765043,1,161340559,-,CACACTGTCCTGTGGCGGTGACCATAGGACTACTGTAGAGCAGAACAGGG,,A,C,1,,129X1/SvJ,substrain,129X1/SvJ,0,C,,,1,0,0,SPIKE,,
SAC016461530,1,161538259,-,TTTGAACTCCCCATGATTATTTAGGAAATGAGAAGGAATTTTTAGATCAT,,G,A,1,,A/JCr,substrain,A/JCr,0,A,,,1,0,0,,,
gUNCHS003024,1,161585957,+,TTGGGGGAAATCATCCTGAATGAGTTATCTTCAAGCCAGAAAGACCAATA,,C,T,1,rs31447971,,,,0,,,,1,0,0,,,
SBC016487472,1,162186810,+,GGCTGTAGTCTGTAACAACCCCAAAAAACTCAAGAAAGAAGCACTTATGC,,C,T,1,rs31400777,,,,0,,,,1,0,0,,,
S1J016490183,1,162254587,-,ATCTCCTTGTGGATTTTCGTTTTCAGATGTCTGGCTGCAGGATCCATGTC,,C,T,1,rs31647256,,,,0,,,,1,0,0,,,
gUNC2073776,1,162338156,+,AAGTTCTTAACTGCTCTTAGGCAAGCCTGTTTATGTGGGAGATGATCTAC,,A,C,1,rs36314842,,,,0,,,,1,0,0,,,
S2J016496731,1,162418283,+,AAGATTCCTATCTTATCCTCTGAGTTCAGAGACTTTGAAGAGCAATCATC,,C,A,1,rs232635601,DBA/2J,substrain,DBA/2J,0,A,,,1,0,0,,E2,E2
mUNC2081992,1,163082817,-,CAATTAAATAACTGGGAAAATATTGTTAAAGAGGAAGTAACCTACATCTC,,G,A,1,rs48309436,,,,0,,,,1,0,0,,,
gUNC2087248,1,163487313,+,AAAAAGGCAAGAGAGAGGCAAGAGCATAAGAGAGAAAAGGGGCCAAGCAG,,T,C,4,rs48536074,,,,0,,,,1,0,0,,,
DBT016552570,1,163814269,+,AGCTTTCCGTATTGGAAAGAAGCATCCTACTTTTCTGTTCCAGTTCCATC,,T,C,2,,BALB/cJBomTac,substrain,BALB/cJBomTac,0,C,,,1,0,0,SPIKE,,
SFT016564456,1,164111400,+,TCAGGGCCTTGTATACATTAGAAAATGCTTTACCATACAGCTGTGGTATG,,G,A,1,rs46461866,,,,0,,,,1,0,0,,,
gUNC2097425,1,164295019,+,TGAACAAGTAAGAGCTTAAACCAGCTTGGGAGCACAGGCCACACAGAGCA,,T,C,1,rs50110673,,,,0,,,,1,0,0,,,
ST2016577749,1,164443734,+,CAGAATCCCAACCCAGCTGTGCAGTCCTCCAAGGCCTGTGGCTCTCTAGT,,G,A,1,rs263547551,,,,0,,,,1,0,0,,,
gUNC2102791,1,164662093,+,GTGAGGTAAAAGTTTGGTTTGCTTTTGGACACTTTTAAATCATACAGAAG,,G,A,1,rs49572131,,,,0,,,,1,0,0,,,
gUNC2111325,1,165212492,+,TGAGTAACAGAAAGCTTGCCTCGTTATGTAAGTAAATGTGCCCATTGCAT,,A,G,1,rs36910560,,,,0,,,,1,0,0,,,
mUNC010333272,1,165602275,+,AAGCATCTTCTGGATGAATTTCAAAATTACAGATCCACATCCAGGCCAGC,,G,A,1,rs48053555,,,,0,,,,1,0,0,,,
mJAX00012213,1,166799244,+,CCTCTGAGCACAGCTCTGTGTCTGCTGCCACCATCTTGGTCTGAGTCATT,,G,A,1,rs37545577,,,,0,,,,1,0,0,,,
SFT016675920,1,166898021,-,TTGTAATCTTGGTCCCCTGGAATCTGTCACAGGGCTGGACCAGATGGAGG,,C,T,1,rs36671182,,,,0,,,,1,0,0,,,
S2J016682475,1,167061879,+,TAAAACTTTTAAAATGTGTATTAGAGTGGCATTTCTGAAAGACTCTTATT,,C,T,1,rs31745112,DBA/2J,substrain,DBA/2J,0,T,,,1,0,0,,E2,Consensus
B10010167264,1,167264681,-,TGTTTTGCCCAGGCCACACTTTCTAGTCCCTGTAAGTAGTGCTAAGGATT,,G,A,1,,C57BL/10,strain group,"C57BL/10ScSnJ, C57BL/10SnJ",0,A,,,1,0,0,,,
gUNC2137048,1,167284399,-,CAAGTCGGGTGTAAGGACCCGGCTTTCGGGGCTTCCCTCGGAGCCCCGGT,,T,C,1,rs257922995,,,,0,,,,1,0,0,,,
SBC016694984,1,167374602,+,GGCGGTGCTGGTTGCTATGGGCGGTGCTGGTTGCTATGGGAGGATTTGCA,,T,C,1,,BALB/cAnNCrl,substrain,BALB/cAnNCrl,0,C,,,1,0,0,,,
S6J016707095,1,167677390,-,CTCTATCAGTGTTCAGAGTCTGTGTGCCTAGGAATAGCAGTTGTCACTGG,,T,C,1,rs49579753,C57BL/6J,substrain,C57BL/6J,0,T,,,1,0,0,,E2,E3
SAJ016739818,1,168495457,-,CCATGTCCAGAACAAAGCAGATGGCTTCAAGTTTACCAAACTGTGAAGAA,,T,C,1,rs31412962,,,,0,,,,1,0,0,,,
gUNC2155319,1,168531538,+,TGGAATCCATTTCTCAGACCACAACAGAGAGTTCGCAGCCCCTTATCTAT,,G,A,1,rs32571785,,,,0,,,,1,0,0,,,
gUNCHS003215,1,169072483,+,GTCAAAAAAGGAAATAAATTGCTTATTTATAATTATGTGTTAGTAGATTC,,A,G,1,rs33762733,,,,0,,,,1,0,0,,,
S6T016769386,1,169234666,+,GACAAGGTGACAACACAGCACACACAAAAGTCCCTTTTGAGCAATCATTA,,T,C,1,rs51056002,,,,0,,,,1,0,0,,,
SFH016774116,1,169352900,+,TCATGTTCTGTGCAGATTGGGTCCAAGACCCTTGTGGCCAGCAAAATCCC,,T,G,1,rs31038983,,,,0,,,,1,0,0,,,
gUNC2173489,1,169692018,-,GCAAAGTAAGAAATGCCACTGCTGTTTCAGAAGAACTGATGCTGGCCTGA,,G,T,1,rs31500201,,,,0,,,,1,0,0,,,
ST2016799911,1,169997780,-,GGTTTCCCAGATGCCTTACAGGTTTTGGAAAGAGAGAATCCTTTGTGTTT,,G,A,1,rs46579721,,,,0,,,,1,0,0,,,
S1H016803365,1,170084149,+,TCTCACAGAATCCCACACAAAACCTCCTGGGTGCTAGGGAACTCTGCTTC,,A,C,1,rs31469845,,,,0,,,,1,0,0,,,
ST2016805137,1,170128437,-,TTAAGAGTACAGGGTAGAAGAATAGACACTGGAGGAGGAAACAGTGGGAA,,C,T,1,rs31467504,129S,strain group,"129S1/SvImJ, 129S2/SvHsd, 129S2/SvPasOrlRj, 129S4/SvJaeJ, 129S6/SvEvTac",0,T,,,1,0,0,,,
gUNC2184852,1,170392509,-,AATTTGGTGAAGGGACAGACTGTAGACAACAGGAACATTTTTGTTTACTT,,T,C,1,rs30717006,,,,0,,,,1,0,0,,,
mUNC010353604,1,170441536,-,GACGTCCATTGTTTGGGGAGGAAAGTGTTTTAAGGTGCAAAGCTATTGCT,,G,T,1,rs31451111,,,,0,,,,1,0,0,,,
S3J016840739,1,171018499,-,CATCTGCATGCAGGCAAGGGTCTGACCACATATATAAAATAGTAATTTAA,,T,C,1,rs48565272,C3H/HeJ,substrain,C3H/HeJ,0,C,,,1,0,0,,,
S2C016846622,1,171165550,+,TTGACAAATGAGGACACTGAGTCATGGAGACATTTATTAACTTTGCCAAG,,G,A,1,,DBA/2NCrl,substrain,DBA/2NCrl,0,A,,,1,0,0,,,
gUNC2203134,1,171867311,+,GGCCCACTCCTCTCAAAAAAAAAAAGTTAGAGAGGGGGGTATGGGGAGTC,,G,A,3,rs231813076,,,,0,,,,1,0,0,,,
SAH016878979,1,171974496,+,GGGTCTGCAACCCTATAGAAGAAACAACAATATGAACTAACCATTCCCCC,,C,A,4,rs32325774,,,,0,,,,1,0,0,,,
DT2015871561,1,172074890,-,CCTCCCTTTAAACTCTGAAATAAAGCACTGAGGTCTGATAAGGAGCAATA,,T,G,1,,129T2/SvEmsJ,substrain,129T2/SvEmsJ,0,G,,,1,0,0,SPIKE,,
mUNC2211957,1,172685919,-,GAAGGGCATATGAGAACTCTTTGTATTGTGTTTTCAACATATCTATAAAT,,G,A,1,rs32374330,,,,0,,,,1,0,0,,,
gJAX00276473,1,172956255,+,CACAGGACTGAATGTGGTAGAAGCCACTTTGGAGTTGCTCTTCTTTGAGA,,G,A,1,rs51586948,,,,0,,,,1,0,0,,,
B10010173079,1,173079095,-,ATGTTGAATCCTACCTTGTAATAAACACAAGAACACCTTGATTCTCTCAA,,G,T,1,,C57BL/10,strain group,"C57BL/10ScCr, C57BL/10ScNHsd",0,T,,,1,0,0,,,
mUNC010380537,1,173961321,-,CAGCCCACAGTTCCTCCCAACCTCAGATCTCAGCAGACTGACTTTTTCAA,,A,G,1,,,,,0,,,,1,0,0,,,
S2H016979284,1,174482102,+,GGGCAAGAGAAAGACAACAGACGGTGATGAGGTAATGAGGGTAATTGATT,,A,G,1,rs33803791,,,,0,,,,1,0,0,,,
gUNCHS003348,1,174577739,+,TTAGTGGGATTGCTTCAAGTTTCTCTCCATTTCTTTTGATTTTGGCTACT,,G,T,3,rs51106529,,,,0,,,,1,0,0,,,
gUNC2246604,1,174996546,+,CAATTCAGACTTCCATCTTAACACTGGGACTCACGGGCTGAAGAAATGCT,,C,T,1,rs50970604,,,,0,,,,1,0,0,,,
S2C017031481,1,175787040,+,AGCTGTCCTGAGCTATTTCCAATATCAAGATAGCAATTTTTCTTGCTTAA,,G,A,1,,DBA/2NCrl,substrain,DBA/2NCrl,0,A,,,1,0,0,,,
S2J017040758,1,176018955,+,TTTATAAGCTGAGCTTCTGGGCCTCTGCTCATCATAAAGACGAAGAATGA,,G,T,1,rs31575382,DBA/2J,substrain,DBA/2J,0,T,,,1,0,0,,E2,Consensus
gUNC2263707,1,176074355,-,AAGGTTGATGCTACTTTACCATGGACATTCTGTGACAATTCCTTGAATTT,,G,A,1,rs30566714,,,,0,,,,1,0,0,,,
gJAX00277311r,1,176453142,+,GCCTGGTCTGCTTTTAAAAGCTGTGTAAGAATATCACTAACCCTCAGGAT,,G,A,1,rs32575945,,,,0,,,,1,0,0,,,
S1H017076373,1,176909348,+,CAACTCCAGGCCAGAAACTGAGGACTCTCCAGGTAGAAAGTGAATGATCC,,A,G,1,rs32529481,,,,0,,,,1,0,0,,,
gJAX00277549,1,177474820,-,GCAAGCATTAGATACTGCATGTGAAGTTGTTAAGGTCGGCCAGTTGTGTA,,C,T,1,rs6334730,,,,0,,,,1,0,0,,,
B10010177515,1,177515297,-,GGTTTGCAACACTCGGAAGTCTAGAAGACCTCCATCACGAAAGAGGAGTT,,C,T,1,,C57BL/10,strain group,"C57BL/10ScSnJ, C57BL/10SnJ",0,T,,,1,0,0,,,
gUNCHS003416,1,177888137,+,TGCTCCACTATCTCCTTGGAGTCTCTCAAATACTGTTGGTCCATCTGAGT,,T,G,1,rs32434599,,,,0,,,,1,0,0,,,
gUNC2283247,1,178204754,+,AAATACCCCAAGCCTCTTGTGTTAGAGTGAGGTTTAGGACCTTCAAAAGC,,G,A,1,rs31089398,,,,0,,,,1,0,0,,,
SSH017130990,1,178274751,-,ACCTACTCATGCTTCCACTCATGTGGAGAGAAAAGCCTAGAGAGGACTGT,,A,C,1,rs48523892,,,,0,,,,1,0,0,,,
SFC017150202,1,178755067,-,GCATTTACAGGTGGCCTTCAAAACTTTTGCTGTGCCTACTTATGGGTGTG,,C,T,1,,FVB/NCrl,substrain,FVB/NCrl,0,T,,,1,0,0,,,
S2J017159510,1,178987755,+,CAACTATCCAACTATCGATTTCAGAAGAACAGTAACTGAGAAAGGGAACA,,G,T,1,rs32047894,DBA/2J,substrain,DBA/2J,0,T,,,1,0,0,,E1,Consensus
SSR017160800,1,179020018,+,TTCATCTAACTGGTCTCTGGTTCCGGAATCACATGAAAGTACTCAGGCCA,,T,C,1,rs38512340,,,,0,,,,1,0,0,,,
gUNC2291918,1,179037607,+,ACCACAGCAGGCTCTTAATAAATCACAGCAATCAGCCTTGGGTTTAAGAA,,T,C,1,rs48577021,,,,0,,,,1,0,0,,,
S2T017161652,1,179041303,-,AGGAACACACTTTGCCCTTTCCCTTTTAGCTCAGGACAGCGATATGGGGA,,C,T,1,rs252534476,,,,0,,,,1,0,0,,,
SAJ017171776,1,179294417,-,GTGGCTTCTAGACTTGGGGTGTTAAGATAAGGTTGGAGATTGCTGTCCCT,,A,G,1,rs31791268,,,,0,,,,1,0,0,,,
S6N017180141,1,179503532,-,AAATGGACCTTTGTATACAAGAGGTTAACAGCGGGGAGTTTACGGCTCAG,,G,A,1,rs222303818,,,,0,,,,1,0,0,,,
gUNC2299232,1,179551740,+,CACCTTTAATTCCAGCATTTAAGAGAGGCAGAGACAGTGGATCACTATGA,,T,G,1,rs256603998,,,,0,,,,1,0,0,,,
SSH017202983,1,180074589,+,TTTCATTCTTTAATTCTTGTTTTATTTTCAGAGTCAACACAGACTGTTCA,,A,G,1,rs32673946,,,,0,,,,1,0,0,,,
gUNC2308922,1,180441833,-,CCATACCTCCATTCCTGTTCCTACCTCACTGACTGGAGACCTCAGTAACC,,A,G,1,rs32430481,,,,0,,,,1,0,0,,,
gUNC2310743,1,180569708,-,AGTGAAGAGACCAGATAGCTGCAGAAAGCGCCGAGACCTCGGGAAGTTTG,,C,T,1,rs48729515,,,,0,,,,1,0,0,,,
SBR017236125,1,180903133,+,GGTGAAGGCCCTGAGGCACTGATAAAAATGATGCTGGGGGCGGAGAACCC,,G,A,1,,BALB/c,strain group,"BALB/cByJ, BALB/cByJRj",0,A,,,1,0,0,,,
mUNC2316922,1,181086598,+,GTTTATTCAAATGGAATCCAGGGCCTCTTTAGCTCCCTTTGTGTATACAG,,T,C,1,rs32746782,,,,0,,,,1,0,0,,,
S6J017252720,1,181318003,-,TACTTGTGGCTTTTAGGCAGATGGCTGTCTTGGGATGCTGGCAGGGGTCT,,A,C,1,rs51237371,C57BL/6J,substrain,C57BL/6J,0,A,,,1,0,0,,E2,E3
DS6017258080,1,181452009,-,ACCTATACACAGTCCAGTCATTGGTCAGAGCCTGTTCACTTTACTTCCAG,,A,G,1,,129S6/SvEvTac,substrain,129S6/SvEvTac,0,G,,,1,0,0,SPIKE,,
SS1017258867,1,181471697,+,CCTTCTGATCTATCTTTAAGCCTGCCTGAGGGTCTTTCCTATCCTCCTGG,,G,A,1,rs32777454,,,,0,,,,1,0,0,,,
gUNC2322479,1,181510678,+,TGGCTCAGTTGCTGAAGCTCCTTGCGTAGCTGCTGGTTCTCCCTGTGGAG,,A,G,1,rs32182707,,,,0,,,,1,0,0,,,
B10010181522,1,181522684,+,TTATACCCTAATTCTAAAGCCCCCGTGATGTTTGTCAGTTTAGAGACTTC,,A,G,1,,C57BL/10,strain group,"C57BL/10ScCr, C57BL/10ScNHsd",0,G,,,1,0,0,,,
gUNC2327373,1,182044576,+,TTGAGAGATGATGGATTGAGAGTCAGGAGACTTCATCTGATCTTAAAGGC,,G,A,1,rs33816089,,,,0,,,,1,0,0,,,
S3N017323697,1,183092429,+,TGAAATGGCCAAGCAGAGCTAACAGCAACACAGCTGCCAGTGGGATGGGG,,A,G,1,rs31394872,,,,0,,,,1,0,0,,,
S3J017332283,1,183307080,+,TCTTACTAGCTAGTTATATAGCATCTTTTGAGTCCTTTTTAAAGTTCTTG,,C,T,1,rs583786720,C3H/HeJ,substrain,C3H/HeJ,0,T,,,1,0,0,,,
S6N017360349,1,184008737,-,GTTTGCTATTCTATACAGTATTACTTCTGACCAAAGGACTTAAAGGCAAG,,C,T,2,rs220138929,C57BL/6NJ,substrain,C57BL/6NJ,1,T,,,1,0,0,,,
gUNC2346376,1,184020986,-,TATGTATATGAAAATACATGCAGCCCAATATTGTCTATCCTTAACTTATG,,G,A,1,rs49992582,,,,0,,,,1,0,0,,,
gUNC2351991,1,184602143,+,CAAGTCATGGGAATAAGAGCTATACACACTGTCTATAACTCAACAGGAGC,,A,G,1,rs247743451,,,,0,,,,1,0,0,,,
gUNCHS003558,1,184926264,+,GCGAACTCCATTACACAGTAGTCACAAGCGTTTTCTTAAATTCCATCACA,,T,C,1,rs33829742,,,,0,,,,1,0,0,,,
S2H017427232,1,185680800,-,TGCTCAGAGATACTCCAGCCCGGTGACTAATGATGTTTTAAGCAAGTCTC,,A,G,1,rs32830441,,,,0,,,,1,0,0,,,
S2H017427579,1,185689482,+,GCAATATGCTTGATAAGTCACTGACCGTCTTCCTAGTTAAACTGTGGCCA,,T,C,1,rs32831895,,,,0,,,,1,0,0,,,
ST2017432544,1,185813602,-,TTCCTATTGAGGACTCTGTGACTGCTGCTGAAGTGATAACTCTAGGTTCA,,T,C,1,rs32844509,,,,0,,,,1,0,0,,,
ST2017432547,1,185813680,+,AGTCACAGAGTCCTCAATAGGAATAGATTCCACCTCAGGGACAAACTGCC,,A,G,1,rs32844512,,,,0,,,,1,0,0,,,
gUNC2368826,1,185816579,+,GGGATGTGGACATGCCACAGTAGGGAGGTCAGAGACCCACTTATGGGCTT,,G,A,1,rs46349368,,,,0,,,,1,0,0,,,
B10010186026,1,186026198,-,GACTTGCAACAGTGAACACACAACTGTGTGAAATCACAGGTACATACATA,,G,A,1,,C57BL/10,strain group,"C57BL/10ScCr, C57BL/10ScNHsd",0,A,,,1,0,0,,,
gUNC2376911,1,186442195,-,GACTGTGGTTGCTCTTGAACATGGCTTGGGAGTGGATTTGAAGAATCAGT,,A,G,1,rs32074490,,,,0,,,,1,0,0,,,
S3N017464347,1,186608695,-,AAAAGATAGTGCTCCTCTTTGAAAGAGAACACTTGAAGACTTAGTACTCC,,T,C,2,,C3H/HeNHsd,substrain,C3H/HeNHsd,0,C,,,1,0,0,,,
gJAX00013701,1,187116521,+,ATAGGTTATGTCAAGTCATCTGGATAGCACACAAACACATCTCTAGCAAT,,G,A,1,rs32493067,,,,0,,,,1,0,0,,,
gUNC2387976,1,187392713,+,CAAAGCATCTACTAGATGTGATATATCTACAGTTTAAGATACTTAAGAAT,,A,C,1,rs32930910,,,,0,,,,1,0,0,,,
SSH017497293,1,187432339,+,ACAATGGAGAACATGGAGCTCTCTAGCTTGTAGAAGGAAGCATGGGAGTA,,G,T,1,rs31928389,,,,0,,,,1,0,0,,,
S2R017532723,1,188318084,+,CAAAGACCATGAATAACCACAACCTAGAAGGTATTGCCTCCTAAATGTTG,,A,C,2,,DBA/2JRj,substrain,DBA/2JRj,0,C,,,1,0,0,,,
gUNC2398055,1,188335477,+,ATATTTCCAGTACCTTATTTGGGTCTTCTTTGGTGTGTTTTGGTAAACTT,,A,C,1,rs108187255,,,,0,,,,1,0,0,,,
UNCHS003666,1,188847965,+,GATATAGGAAAAGGTGTGTCCATAGGTCTACAAACAAAGGAGACTATAGG,,G,A,1,rs50351492,,,,0,,,,1,0,0,,,
S6J017555686,1,188892174,+,AATCAGCCTGAGACAGTGACATGATACTGACACCTGGAAACACATTGGGC,,T,C,1,rs32659481,C57BL/6J,substrain,C57BL/6J,0,T,,,1,0,0,,E2,E3
gUNC2404892,1,188910165,+,TTCAAAAACATCTCCCTCTCCCATATCATTATTAAAACTATGTCAATGTA,,T,C,1,rs244554908,,,,0,,,,1,0,0,,,
gUNC2409375,1,189254951,+,ACTGTCATACAAGCCTGGAGACCTGTATTCATTCCAGAGTCTATAGAGAG,,C,T,1,rs46226975,,,,0,,,,1,0,0,,,
mUNC2410175,1,189304410,-,AGTGTATCCTTTATTGCCTTCAAGTTTGCTTTCCTTCAAGGTTTACACAG,,G,A,1,rs32985557,,,,0,,,,1,0,0,,,
gUNC2412055,1,189455418,-,CTTTACCAGTCACTCCATAGGGATGCAAGGCTTACAGAAGTCTTTAACTA,,A,G,1,rs32994825,,,,0,,,,1,0,0,,,
gUNC2415435,1,189710695,+,TCTCTGGAGAGCCCTGGCACACTCAGGAAGTAGCAAAGTGATATCTACTG,,T,G,1,rs33013324,,,,0,,,,1,0,0,,,
gUNC2415435b,1,189710695,+,TCTCTGGAGAGCCCTGGCACACTCAGGAAGTAGCAAAGTGATATCTACTG,,T,G,1,rs33013324,,,,0,,,,1,0,0,,,
gUNC2415693,1,189729020,+,CAGCCTTGATACCAAACTCCTGAGTCTCTTGGCCCCGGCTTGGGTGATCC,,T,C,1,rs51253278,,,,0,,,,1,0,0,,,
gUNC2416218,1,189763068,-,GCAAACCTGTGGTAAACCTAAGCCCTGAGGTAGTAGAGAAAGACATAGTC,,T,C,1,rs47337322,,,,0,,,,1,0,0,,,
SFT017595245,1,189881144,-,AAGGCCCAGGGTCCCTTCTGTTGATGTCACATCTGTTTTCTCAGTGACAC,,A,G,1,rs31377065,,,,0,,,,1,0,0,,,
ST2017596015,1,189900389,+,GGCTTGGTCAAGGTGTTTTTTTGTTGCTTGGGGAATTTTTTTAAGGGTCC,,C,T,1,rs33032184,,,,0,,,,1,0,0,,,
ST2017596122,1,189903057,-,TTAGTGTTTCTCCCAGGAGTTGATGCTTGGGAAATACCAAGCCCCTCTCA,,T,C,1,rs47021878,,,,0,,,,1,0,0,,,
ST2017596258,1,189906474,+,GGGTTTCCACTGTTCTAGGCCTTTTCAAATGTAACACTGTCTCCTTGCCT,,C,T,1,rs223374986,,,,0,,,,1,0,0,,,
ST2017597987,1,189949686,-,AAATTATTTCTAACCTCCCACCTCTCCTCCTGTAGCTTTACCAGGAGACC,,A,G,1,rs51259531,,,,0,,,,1,0,0,,,
ST2017598286,1,189957174,+,CCCTCCAGGTGTTTCCTCTTACTATACCTCATCTCGACAATTTTATTTGC,,A,G,1,rs33028043,,,,0,,,,1,0,0,,,
ST2017598296,1,189957421,+,TGACAATGACCTTTCTCAAGCCATGGTGTGCAAAAATAACTTTCCCAGAG,,A,G,1,rs33028860,,,,0,,,,1,0,0,,,
S3J017598417,1,189960445,+,ATTTTAAATTGTCTGAGTTCACACCTCCAGCTTAAAGCAAGAACGTAGGA,,G,A,1,rs253356382,C3H/HeJ,substrain,C3H/HeJ,0,A,,,1,0,0,,,
ST2017598604,1,189965120,-,CTAAATCAAACTCTCCAAAGGGCTTATACCCGAAGTTTCATTAAGTGACC,,C,T,1,rs32047492,,,,0,,,,1,0,0,,,
ST2017603287,1,190082191,-,ATGTCTGAACATTAGCATGGCTAGGCTCTTGAAGCAAACACAGGAAAGAT,,C,T,1,rs30557842,,,,0,,,,1,0,0,,,
ST2017603365,1,190084128,-,TACCCCGAAGTACAATGTAGACACAGTCTTAACAAGTGAATGGTGTCATC,,G,A,1,rs33043695,,,,0,,,,1,0,0,,,
gJAX00280215,1,190085535,+,AAGTCAGCATGGTGTTCATAGTTGTCATATCAGTAGCTGTGAGGAGGACA,,C,T,1,rs32051408,,,,0,,,,1,0,0,,,
ST2017603443,1,190086090,+,TCTTCAAATGGCTTTCAGCTCAGCATATTAGAAAGCAAGGTGATTGGCAG,,G,A,1,rs31279951,,,,0,,,,1,0,0,,,
ST2017603481,1,190087027,+,CACACGTTGGGGAAACAGCAATGTATTCATGGGGCATGGTTTGATCCTTA,,C,T,1,rs31498745,,,,0,,,,1,0,0,,,
ST2017603515,1,190087891,+,AACCTCTAAGAGCAGAGCAGTTACCAGCAAGAATATCCTGGGAAAATGAA,,A,G,1,rs3693002,,,,0,,,,1,0,0,,,
ST2017603569,1,190089245,+,GGAATCTGCTCTTAAATCCCAGATGACTTTGGATGCATGGAGTGGCTTAA,,C,T,1,rs33042525,,,,0,,,,1,0,0,,,
gUNC2420778,1,190105925,-,CTGAACCCTAGAGCCCACACACTGGAAAGAATAGAAATTTACAAACCAAT,,G,A,1,rs33043385,,,,0,,,,1,0,0,,,
S3J017604268,1,190106704,+,CATATGAACAGGGCTGAGGAAACTGTAGGCAGACAGAATTAGCAAAAATT,,C,A,1,rs33043392,C3H/HeJ,substrain,C3H/HeJ,0,A,,,1,0,0,,,
gUNC2421003,1,190124682,+,GAAATGCCAGTTACTGGGAGATAATTGTCCACGAACAAGTGCAGTGTCTC,,C,T,1,rs31378221,,,,0,,,,1,0,0,,,
gUNC2422597,1,190296934,+,ATTGAGACAGGGTCTCACTTTGTAGCTCTGGCTGGTCTAGAACTCACTAC,,G,A,4,rs32660955,,,,0,,,,1,0,0,,,
mJAX00013946,1,190394209,+,TCATAGCAATGGCCACTCTAGGGGAGTCTATGCTTTCGTTATTATGATAG,,A,G,1,rs31516095,,,,0,,,,1,0,0,,,
ST2017618750,1,190468772,-,ATCAATAATGACACCCCTAACAGCTCTCCTCCGTCCACTGCAGTTGTATC,,A,C,1,rs33889121,,,,0,,,,1,0,0,,,
gUNC2424584,1,190469788,+,AGGCCTGGTCCTACATAATGTAATGTACTTAAAGAGGCCATGAGGATGTC,,T,C,1,rs50446804,,,,0,,,,1,0,0,,,
gJAX00280323,1,190487504,-,CCCTGAGGTGTGAACTGTCAGTGGTAGGCAGCATATTTCCCATATTAACC,,G,A,1,rs31114859,,,,0,,,,1,0,0,,,
ST2017622000,1,190550021,+,GTGGGACTCATGTGGACACAAGAGCAACACCTGTAGCTTTGTAGACCTGG,,C,T,1,rs256238232,,,,0,,,,1,0,0,,,
gJAX00013965,1,190655586,+,CGGTCTTGCCAATAGGTTGAAACGGAGACACAATGGGAATGGGCTGAAAC,,G,A,1,rs32792351,,,,0,,,,1,0,0,,,
mUNC2429277,1,190903349,+,TGAATCATCTTCCCAACCCACTCAACTTTTTCTTAAAAATTTAGAGGAAA,,C,T,1,rs49641767,,,,0,,,,1,0,0,,,
gUNCHS003721,1,191000606,-,CTGCAACTGTTACCGTTGTTTGTTTTCACATGGTTCTGGTCGCTTGTCTA,,G,A,1,rs39752013,,,,0,,,,1,0,0,,,
mUNC2430731,1,191040279,+,GTTCAGAATGGAAGTAAAATGGAGTTTTAGTAACAAATGTGACACACAAC,,A,G,1,rs37805150,,,,0,,,,1,0,0,,,
gUNC2431046,1,191067818,-,GACACACTTGCTGTTCCTTTTCCCACACACAGCACTGCCTTGTGTCTCCT,,A,C,1,rs32595655,,,,0,,,,1,0,0,,,
gJAX00280416,1,191082535,+,CAACATTTGGGTCACAGTCTGATGCCTGAGTGACTTCATGAAAGTGAGTG,,G,A,1,rs31922497,,,,0,,,,1,0,0,,,
gUNC2431585,1,191109589,+,ACTGCTGGGCTGATTCTCCAGCCCTGAGAATTTTGTTTCTGGTTGGGCCT,,T,C,1,rs37234775,,,,0,,,,1,0,0,,,
gUNC2431766,1,191124263,+,ATGTAGGGTTTCTAAGAAAGACATGGTGGGGTGACATTTCCAGGAACTGA,,A,C,1,rs36523773,,,,0,,,,1,0,0,,,
gJAX00280436,1,191246437,+,GGATACACCCCTCTGTACTTGTGAATAAAGTCACAGAGATTCACTGCCAC,,C,T,1,rs33842796,,,,0,,,,1,0,0,,,
gUNC2433755,1,191318844,-,CCATAATCATGTTCGTTGCAACACAATTCTATAAAAGAGCCAGGCTAGGA,,T,C,1,rs264159508,,,,0,,,,1,0,0,,,
S3T017656127,1,191403179,-,GTGACAGATAACCAAGGAAAGCAGAGGAGTGCCAGAGGCGAGACAGACCC,,G,A,1,rs33840103,,,,0,,,,1,0,0,,,
UNC2434587,1,191407676,+,CTTTAGTTCTGATGGATCCGAAGCAACAGTGTGACTCTGAGGAGCTAGAA,,T,G,1,rs33838826,,,,0,,,,1,0,0,,,
JAX00280488,1,191498216,-,GAGTGCAGCAGCCACACATTGGGCAGCTCACACTTACACGTGATTGTGCA,,A,G,1,rs33841045,,,,0,,,,1,0,0,,,
UNC2435874,1,191500242,-,ATGAATTTGTAGACCTCAGTGGAGCAGGTATATGTTTGAGGGCAGGGCTC,,G,T,1,rs33839360,,,,0,,,,1,0,0,,,
UNC2436046,1,191514199,-,GACAGTGGGCCTGTAAGACAAATGAGGGCCTCTAACTATGGAGAGAGAAA,,T,C,1,rs33834825,,,,0,,,,1,0,0,,,
UNC2436405,1,191556153,-,CACCCACGTGTAATCTTTGCTGGGGAAGTCCTGGGAGACTCCTGGGGCTT,,T,C,1,rs32478629,,,,0,,,,1,0,0,,,
SX1017664092,1,191602307,+,TGTGCACTGCACACTCCTTATGACAGCTTGAAACTCGGGATGTTGTCTGT,,C,T,1,rs33835424,,,,0,,,,1,0,0,,,
UNC2437403,1,191657427,-,GTCACAGTGCCCCAAGTGCAAGGATGAGAGGCAAGCAGACTCAGGAGTGC,,C,T,1,rs47639356,,,,0,,,,1,0,0,,,
SAH017668513,1,191712828,-,CATTTTAGAAATGGGGAGAGTAAGCAATTTACCCTGGGTCACTTAGCAAG,,G,A,1,rs256898907,,,,0,,,,1,0,0,,,
B10010191790,1,191790774,-,ATGTCACTCTTTGACTTGGTTTCTCCTTGCTCCCATATCATCAAATAGTC,,G,A,1,,C57BL/10,strain group,"C57BL/10ScSnJ, C57BL/10SnJ",0,A,,,1,0,0,,,
SBH017697674,1,192441859,+,CTCTTTAATCTCAGTCTAGGGAAAGCCTGCTGTGTTTTAATCCAGTGAGC,,A,G,1,,BALB/cAnNHsd,substrain,BALB/cAnNHsd,0,G,,,1,0,0,,,
gUNC2444978,1,192498891,-,AGGAAAAGCAAGCCCAGGAGAGCAGTAGATTCCTGGAGCCTTGACACCAC,,C,T,1,rs32054322,,,,0,,,,1,0,0,,,
S2J017703609,1,192590248,-,CCTACTTAGGCATGACAAACCTGGCCCTTTACTTTTAAATTTAGTGTCTT,,C,A,1,rs219882455,,,,0,,,,1,0,0,,,
UNC2447782,1,192754891,-,TTGAACCAGGGTCTTGTGCAGCCCTGAATGGCCCCAAACTTGCTATGTAC,,C,T,1,rs13500851,,,,0,,,,1,0,0,,,
UNC2448512,1,192818915,-,GGCAGAAGGAAGGATAGTTCCTTGATTTCTGGATTGAGTAAAGGCTTTGG,,G,T,1,rs32559513,,,,0,,,,1,0,0,,,
gUNC2448897,1,192864042,-,GCTTCAACAGTTTGAGATTTACAGAAACACCAAGAAGAGAGTACCTATGC,,C,A,1,rs13492248,,,,0,,,,1,0,0,,,
gJAX00280763,1,192869205,+,TTCAGTGAGCTCCTGAGTCATCTGCAGTATGTGAACTTCTCACTTACCAG,,G,A,1,rs13500567,,,,0,,,,1,0,0,,,
SX1017717580,1,192939520,-,ATTCCTGCTGGGGCTGTGAGTGCAAAAAAGTGTCATTCCAGCACCCATTG,,A,G,1,rs13500397,,,,0,,,,1,0,0,,,
UNC2449523,1,192941983,-,TATGAGGGCAGGTGCATGTATGAGTATGACTGTGTGCATGTGGAAGCCTT,,A,C,1,rs30897483,,,,0,,,,1,0,0,,,
JAX00014139,1,192967389,+,GTGAGATTCTTCATGAAACTAGCAGCAGCTTAGGCTCTGAAATTAGTGTT,,A,G,1,rs13500329,,,,0,,,,1,0,0,,,
JAX00014142,1,193010973,-,ATGTAGCATCCAAACCGTAGTACTGTTAATGCCATCTAATATCAATCTTA,,A,G,1,rs13491678,,,,0,,,,1,0,0,,,
S1L017726152,1,193153805,+,GAGATGTCTGTGGAGTTCCAGGTAGCCAAGCTAGGTGCTGGGGAGGGTGG,,C,T,1,,DBA/1LacJ,substrain,DBA/1LacJ,0,T,,,1,0,0,,,
JAX00014166,1,193318232,+,ACAAGCTGAGGTCAGTAAAGAAATAGCTATTGATCACATGGATGAAAATA,,A,G,1,rs32077006,,,,0,,,,1,0,0,,,
gUNC2453835,1,193345281,-,TGTTGGGAGAAGAGGAGGATGGGCCATGGATCTGACTCACTAATTAATAG,,G,A,1,rs31475170,,,,0,,,,1,0,0,,,
UNC2454760,1,193421248,+,TTAGGGCAGACGTGTCTTGAGTGATTTTCTTACCTCTGCTGCTCTGGGGT,,G,A,1,rs32412445,,,,0,,,,1,0,0,,,
gUNC2456034,1,193514036,-,CTGGAGACTCACCCCATCTCTGTTTCTGTTTGCACAGCCTTACTCAGGCT,,A,G,1,rs33174703,,,,0,,,,1,0,0,,,
JAX00014180,1,193519214,-,TAAAGTGATCCAACTTGGAAACTGCATACATAGCTCTAAACATTACAGAA,,C,T,1,rs30663294,,,,0,,,,1,0,0,,,
gUNC2456475,1,193562834,+,CTATTTTACTATGTGATCTTGAAGGACAATATCATGTTCCCTTGAAAGAC,,C,T,1,rs32735498,,,,0,,,,1,0,0,,,
gUNC2456861,1,193596481,-,GTGGCTGAATCCCCACTTCATCTCTTTTCCTCCCCTTCCCCTGAATGGAA,,C,T,1,rs45941691,,,,0,,,,1,0,0,,,
gUNC2457020,1,193608539,+,GTAAGATTTAGTGGCTCTATGCTCACTTTAGGATGTAGTCCTGGAGAGGA,,T,C,1,rs31137581,,,,0,,,,1,0,0,,,
gJAX00280926,1,193653881,-,CTTGGAATTTCTAATACCCATGACTGCATCTCCATGGTCATCTCCAGCCT,,G,A,1,rs33188917,,,,0,,,,1,0,0,,,
UNC2457544,1,193654902,-,TCTGATATGTCCCCATCTTTTTCTTGGGATTTAATTCTTCCTTTGCTATG,,A,G,1,rs3723886,,,,0,,,,1,0,0,,,
gJAX00014191,1,193673297,+,CATTAGTGTTAGCTTAAGGAGTAGCTACTGACACCCAAGAGTAAAGGTCG,,A,G,1,rs30894337,,,,0,,,,1,0,0,,,
gUNC2458018,1,193688845,+,CTGTTGTGGTGTTTCCTGGTGAAAGCTGGTGTGGGAGATGAGACACAGAC,,C,A,1,rs31770244,,,,0,,,,1,0,0,,,
gJAX00280954,1,193709621,+,GTTTACATGGCATATTCAGGAGCTCTGTGCAAATACCAGGTTACCTCATG,,A,G,1,rs33195705,,,,0,,,,1,0,0,,,
SX1017749302,1,193732571,+,ATTCCTCCCTATCTACTTCTAGGGCCCATGGGAGAAGAGTAAGAGTCGCT,,C,T,1,rs30602486,,,,0,,,,1,0,0,,,
S6R017757122,1,193928056,+,GCAGGTAATTCATGTCTTAGAACTCAGGGGAGCACTCTCATGGTTGAGGA,,G,A,1,rs33220143,,,,0,,,,1,0,0,,,
gUNC2460085,1,194000258,-,GGTATTGCTTTCCAATGTCTACAGAAGCAGTCTCAGGTGGAAGCCTTCTA,,C,T,1,rs243171663,,,,0,,,,1,0,0,,,
S6N017761985,1,194049631,+,ACAAGGACAATAATAGATGTGCTAAAATAAACCAGGGGAAGTCCACAAGT,,C,T,2,rs245486258,C57BL/6NJ,substrain,C57BL/6NJ,1,T,,,1,0,0,,,
gUNC2460751,1,194149219,+,TCTCTAGCTGCTGGGCTGTTAAAGTTTGCAACAGCAGGGCCAAGGATGGT,,A,G,1,rs32271175,,,,0,,,,1,0,0,,,
UNC2463449,1,194625219,+,CCATCCCCAAGTCCCTGTCACAGGCCTGCTCGTCTTCTTACTCCCTAATG,,T,C,1,rs32680328,,,,0,,,,1,0,0,,,
mJAX00014283,1,194886567,+,GGAGAGAAAAGGCATGGAGTTCAGTGGCAGTTCATCTAGTTAGACTCTGA,,G,T,1,rs48169010,,,,0,,,,1,0,0,,,
mJAX00014283b,1,194886567,+,GGAGAGAAAAGGCATGGAGTTCAGTGGCAGTTCATCTAGTTAGACTCTGA,,G,T,1,rs48169010,,,,0,,,,1,0,0,,,
SFJ020144611,2,3615298,+,AAGCTCACATAAATTACCCCTGCTGGCCCAGGGTCCATACCCAGGGGGCA,,G,A,1,rs27095388,FVB/NJ,substrain,FVB/NJ,0,A,,,1,0,0,,,
gUNC2475948,2,3963828,+,AAGTGGTCTTTTGTTCACTGTGGTAGGCCTGAAGGGAGATGGCCTGTGTG,,C,T,1,rs242844353,,,,0,,,,1,0,0,,,
B10020004250,2,4250147,-,AGTCAGTTGTATCTATTCAAAACGTCTTAAGTGATCTGTGGCTGTATTAT,,G,A,1,,C57BL/10,strain group,"C57BL/10ScCr, C57BL/10ScNHsd",0,A,,,1,0,0,,,
mUNC020003180,2,4439201,+,ATCTGTCACTACCCTCCTCATCCCTACATTTTATCAGTTTTTCGCCTCAC,,A,G,1,rs32957975,,,,0,,,,1,0,0,,,
SNT020204170,2,5104271,-,ACAGACGCTGAACCAATAATCAGGGAGCCTGCATGGGGTAGACCTAGGCC,,G,A,2,,,,,0,,,,1,0,0,,,
gUNC2495151,2,5265330,+,TGTGGATATGCCATTAGACTCTGGATGTCAACCACCCATATTGATATAGA,,A,G,1,rs230513861,,,,0,,,,1,0,0,,,
gUNC2501218,2,5671325,-,CCTTCAGTAAGTAGAGGTCAACACTGTACAAGGTGGAAAGTAGAGACTAT,,G,A,1,rs218333836,,,,0,,,,1,0,0,,,
gJAX00482601,2,6571220,+,GGTGTAAGAGTGTGCTAGACAATAGCCTAAAAAGTTTCCAGTCAGTGTCC,,G,A,1,rs27083559,,,,0,,,,1,0,0,,,
S1J020264784,2,6619624,-,GGGAATGCTAGGGCAGTGAGGCAGGAGTGGGTGGAAGGGTGGGGAAGCAC,,G,A,3,,,,,0,,,,1,0,0,,,
gUNCHS003923,2,6625111,-,GCACATCCCTCTGTATCTGCTCATGTATAAGCACTTCACATGTGTGCTCT,,A,G,1,rs243472813,,,,0,,,,1,0,0,,,
S2C020289707,2,7242679,-,AGTTCATGTGTGCAATCCTGTTGTGTCTGTTTCGTTGGTGATTTCACAGC,,G,A,1,,DBA/2NCrl,substrain,DBA/2NCrl,0,A,,,1,0,0,,,
gUNC2522862,2,7328079,+,ACCTGGCAGGCTTCCCTGAATGCCCAAAGGAAAAGAAATAAAAATTTAGA,,C,A,1,rs218905703,,,,0,,,,1,0,0,,,
mUNC020363105,2,8148141,-,CCATACAAATGTAAGCAATTTTTAAACTTCTGTGTCTGTATTACTGACTC,,T,C,1,rs6225196,,,,0,,,,1,0,0,,,
SNJ020344053,2,8601330,-,TTGTGTGATTTACTTATAGGAGAAGACAAAAGTATCAAGTGGGAGAGAAG,,C,A,1,rs226985171,,,,0,,,,1,0,0,,,
gUNC2540465,2,8871100,+,GGGACAAACATTGACTTATTTGCTATAAGATTGACTAGATTCAGGTTTTT,,C,T,1,rs33751117,,,,0,,,,1,0,0,,,
B10020009380,2,9380436,-,TGTCAGGTCATCAGGTTCTAAATAAACATGGACAAACCACTAGCGTTCGC,TGTCAGGTCATCAGGTTCTAAATAAACATGGACAAACCACTAGCGTTCGG,G,C,3,rs231236235,,,,0,,,,1,0,0,,,
gJAX00091105,2,9477814,-,CCAGAGTGACCCTAGAAACATGATTTTCTTTGACCTATTAAGCATCTTCC,,C,T,1,rs45648206,,,,0,,,,1,0,0,,,
gUNC2553197,2,9821723,+,ACTAGTATTTCTTTCTTTTCTACAGTTGGCGTTTGTGCCAATGGTATCGG,,A,G,1,rs232608052,,,,0,,,,1,0,0,,,
gUNC2561908,2,10403914,+,TCAAACTGGATAGCCAAGGAGGAGCTTGACTTGATTCTTCTGTCTCTACC,,C,T,1,rs242299980,,,,0,,,,1,0,0,,,
SFR020417522,2,10438066,+,CTGCAAACCTTCTGGAAGGTGTATGTATTGCTATTATTCATCTATTATAG,,C,A,2,,FVB/NRj,substrain,FVB/NRj,0,A,,,1,0,0,,,
SFC020438458,2,10961470,-,ATATATTTGCTCATAGTAGTGGCTCCTTCCTTCCCAGAAGAAAACCTTTG,,C,A,1,rs1134703357,FVB/NCrl,substrain,FVB/NCrl,0,A,,,1,0,0,,,
gUNC2571163,2,11047885,+,TCTGGGCATATACCCAAAAGTTATTCCACTACACCACAAGGACACTTGCT,,C,T,3,rs29765920,,,,0,,,,1,0,0,,,
SBH020446213,2,11155348,+,TGCCTCCTCCATAGACTCTTTGAGCACCCCATCAAATACAGAACAACATT,,C,T,1,,BALB/cAnNHsd,substrain,BALB/cAnNHsd,0,T,,,1,0,0,,,
S6J020446834,2,11170851,+,CCTACTATGTATAAGTATTTACTATGTTGCCAACATCCTGTCATTTGTAT,,A,G,1,rs13476348,C57BL/6J,substrain,C57BL/6J,0,A,,,1,0,0,,E2,E3
DFT020456254,2,11406374,+,ACACTTTCCCTGGGTAAATAATCAAACCCTGAGTCAACACTCAACAGATA,,G,T,1,,FVB/NTac,substrain,FVB/NTac,0,T,,,1,0,0,SPIKE,,
gJAX00483446,2,11784932,+,CTGCCTGCCTCTGCATCGCAAGGGAACTCTTCAATTTAATACTTGGGCTT,,T,C,1,rs27099189,,,,0,,,,1,0,0,,,
gUNC2592778,2,12541262,-,GCCCTTGGTCTTGCGAAGATCATATACCCCAGTACAGGCGAATGCCAGGG,,A,G,3,rs216690525,,,,0,,,,1,0,0,,,
gJAX00091360,2,12863553,+,TCTCTTAAAAATAACCAATGTGAAGGAAGGAAGAATTTCCAATGGCTTTT,,C,T,1,rs27146613,,,,0,,,,1,0,0,,,
SBJ020533570,2,13339262,-,GCCTTACTTATGTTTAATTATGATTGTATTTGATTCTATTGCAGTGATTT,,C,A,1,rs253744240,,,,0,,,,1,0,0,,,
mUNC2606288,2,13676512,+,AAGGCTCAAACTCTGTATGTAACTGCAGCTGTCAAGTTCTTTCACATTGA,,G,A,1,rs255644222,,,,0,,,,1,0,0,,,
SBT020550682,2,13767063,-,TGGTTCATGTCTTGCTCGTCTGTTTCCTGGCCAGATGGGATGTGAACAGC,,G,A,2,,BALB/cJBomTac,substrain,BALB/cJBomTac,0,A,,,1,0,0,,,
gUNC2610362,2,13974923,-,TTCAATACAAAGTAATAGCATTCCCGAGGTTTCATTGACCAAATTATTCC,,T,C,1,rs27170006,,,,0,,,,1,0,0,,,
SBB020584334,2,14608362,+,AGACTATATTTCAAAAACTCACTGTGCAAATAATAAACAGGACACAACTC,,C,A,1,,BALB/c,strain group,"BALB/cByJ, BALB/cByJRj",0,A,,,1,0,0,,,
S1L020586371,2,14659297,-,AGGAAGTCATGAACCCAACAGGGTCCCAACCATAGGCTCTGGGTTAAATG,,C,A,1,,DBA/1LacJ,substrain,DBA/1LacJ,0,A,,,1,0,0,,,
mUNC2619648,2,14678255,-,GTACACACTGAAGCACTCACAGGAGAACTTTAGACTAACAAGCAAGAACT,,C,T,1,rs27132718,,,,0,,,,1,0,0,,,
mUNC2624191,2,15062468,-,CTACGAAATATACAAAGGCTGTAGGCTCTATCAATTCCCTGCCTAGTTCT,,G,A,1,rs27136351,,,,0,,,,1,0,0,,,
gUNC2633019,2,15775822,+,CACATCTTTGCCTCCTGGTCAGGGGCTGGCTGATTATGGTGGAGTCTTTA,,A,G,1,rs27119425,,,,0,,,,1,0,0,,,
gbackupJAX00215705,2,16450126,-,ACATAGTCCAATGCCTGCAGGGACTTGGAAAATGCCATTAATAAGCATAG,,T,C,1,rs49870189,,,,0,,,,1,0,0,,,
mJAX00484113,2,17092645,-,GAGATCCACTGCAGGCTGAATATAGAGCTCACACAATTGTGAGATATAGA,,A,G,1,rs27125482,,,,0,,,,1,0,0,,,
gJAX00484223,2,17915505,+,AAATGTCAATAGAAGATTCTGTTTGGGGGATGGTGAATCTCCTGCCCATT,,A,G,1,rs27125983,,,,0,,,,1,0,0,,,
gUNC2663264,2,18474320,+,TGATTATTTTCTTTCTCATTGCTGTGACAATTTTTTTAAAGGAATGGGGG,,C,T,1,rs237661831,,,,0,,,,1,0,0,,,
DX1023823158,2,18624897,+,ACAATATCTCAAACATTTAAACCTAATGCCCACGTCCAAGTAAATCTACT,,G,T,1,,129X1/SvJ,substrain,129X1/SvJ,0,T,,,1,0,0,SPIKE,,
gUNCHS004121,2,18667432,-,GCTTCTTTTCTTTTCCCCATGTTCAGTTCAAGATTTCCCTAGCTGTACTG,,C,T,1,rs51370753,,,,0,,,,1,0,0,,,
SAC020750668,2,18766714,+,CAGCTTTTAAACATGGACTCTAGTTGGTCGTGATCTTTTCTGCGATTTTC,,C,T,1,rs27144307,,,,0,,,,1,0,0,,,
B10020019473,2,19473898,+,CACTTCCAAAATTACTTAATCATTTATTCAGCTTTCTACCTTATGTTAAA,,C,T,1,rs222598181,,,,0,,,,1,0,0,,,
S2C020779389,2,19484740,+,TTATATGAAACAACTTCTTAAATTTGGAGTCAATAGCCAAGGTTTGTAAT,,C,T,1,,DBA/2NCrl,substrain,DBA/2NCrl,0,T,,,1,0,0,,,
S6J020782084,2,19552120,+,CTTTCACTACCTGTTCTCTCAGCAGGGAACATTTTGGCTCCAGATGCATG,,T,C,1,rs33491214,C57BL/6J,substrain,C57BL/6J,0,T,,,1,0,0,,E2,E3
gUNC2679953,2,19764084,+,CTCCAGAAAAAGTGGCATTCAACTGTTCAAGTCATTCAAGTCTGCCCTAC,,A,G,1,rs49733425,,,,0,,,,1,0,0,,,
gUNC2688214,2,20281542,-,TTTACAGTTATTGGTGAATGGATTTTATTGAGAAATCATTGTACAATTCA,,T,C,1,rs3688119,,,,0,,,,1,0,0,,,
mUNC020012706,2,20727977,-,TCTGTATGCCCATCTTAAACGCAGACATCCAGCTCTGATCACATGGGGTG,,T,C,1,rs32897963,,,,0,,,,1,0,0,,,
gUNC2706030,2,21389604,-,AAAATCACTACTGTTATACCCAATGTATACACCCCATGTCATATTTTTGT,,G,A,1,rs32877346,,,,0,,,,1,0,0,,,
SAJ020862287,2,21557181,-,AGATGTCAGCTCCTATTAGCTCACATGACTATCCATTTCCTAAAATGAGG,,A,G,1,rs27136853,,,,0,,,,1,0,0,,,
gUNC2711956,2,21749896,+,CAGGAGATGCTTTCTTTCTGACTGGATTTGAGTCAAGAAAGGACTTGCTT,,G,A,1,rs27122008,,,,0,,,,1,0,0,,,
SFT020911336,2,22783415,+,ACTCATGAAGTAAAGAAATGATAGAGGGGGCAGTGTGTGGGAGTGACCTC,,G,A,1,rs33397466,,,,0,,,,1,0,0,,,
gUNC2730264,2,23280247,-,GCCTGCACTGGTTTAGTCTCCAAGAGCAGTTTCCTAAAAACCTGTCAGTC,,G,T,1,rs247369836,,,,0,,,,1,0,0,,,
gUNC2731905,2,23441775,-,TGTGTACTGCCTCCATCCACACCTTCCCTCTCTCTTCAGAAGAGGTGAGG,,A,G,1,rs27198838,,,,0,,,,1,0,0,,,
DNT020948605,2,23715137,-,CTTCCTCGACTACCGTCAGTTCTATGTTATCTACTTCCAAGGTAAACAGT,,A,G,3,,,,,0,,,,1,0,0,SPIKE,,
gUNC2739917,2,24133033,+,GTGTGTGTGTGTGTGTGTGTGTGTATGTATGTGTGTGTGTGTGAGATTCC,,A,C,3,rs52144367,,,,0,,,,1,0,0,,,
S3J020972567,2,24314191,-,CCAACATACAACACTTTAGGAGATAAGCCATATCTAGGCCACACAAGCAC,,C,T,1,rs27187493,C3H/HeJ,substrain,C3H/HeJ,0,T,,,1,0,0,,,
B10020024585,2,24585842,-,AGGGGTTCAGGGTTCTCCAGCAGTGGGGGTTAAGCTGTGGATATGGGGGA,,C,T,4,rs216703578,,,,0,,,,1,0,0,,,
gJAX00485387,2,25029526,+,TCCACGTTGATTCCTGGTTCTATGCCTACAGGTCACCAGCTTGGATTTAA,,C,T,1,rs27200816,,,,0,,,,1,0,0,,,
S2H021016392,2,25409824,+,CCAGATTCTGAAGACCCCTTTCTGTGGGATAAAAAGAGTTAGGAAAAGGA,,G,A,1,rs28232004,,,,0,,,,1,0,0,,,
gUNCHS004244,2,25630940,+,TTTGAGAGTGGTGGGTGGTGGGGTAGAGGGCTCTAGAGCCTGCCAAGTAG,,A,G,1,rs33071585,,,,0,,,,1,0,0,,,
gUNC2767893,2,26331832,-,CTGTGTCAGTCCCTCACCTGTCCTTTTAGTCCCTTCTCCATGCTAGAAAT,,C,T,1,rs27216012,,,,0,,,,1,0,0,,,
S6N021054676,2,26366905,+,ACAGATGACTCCCTGAGAAGCTATGGCAGGGCTGTTCTCAGGGAGAGCCA,,C,T,1,rs260240367,C57BL/6NJ,substrain,C57BL/6NJ,0,T,,,1,0,0,,,
gUNC2770303,2,26590857,-,CATCAACATCTGTAAGAAATGAAGGTGTCAATCTAGTGTCTACAGGAGGC,,C,T,1,rs32859631,,,,0,,,,1,0,0,,,
SFT021080567,2,27014175,+,ACTATCCACCCTCTGAACATCGCAGCTGGCGTGTGGATGATGTGAGTAGC,,T,C,1,rs262377657,,,,0,,,,1,0,0,,,
gUNC2781257,2,27416645,+,ACTGTGGGGATTGCTATTCTTGTTTATCTTTTGGAGCCAAAAGCCAAAGA,,T,C,1,rs27217000,,,,0,,,,1,0,0,,,
DP2021106127,2,27653199,+,CTTAGCACTGCAGTTGCTAGAACTTTGGGAAAGATTGACAGTAATTCCCT,,A,G,3,,,,,0,,,,1,0,0,SPIKE,,
gUNC2792471,2,28166771,+,TAACAGTGACGTCTGTGGAAGTGAAGGCTTTGTTCTGACTGGGGGCCAGC,,A,G,1,rs49366582,,,,0,,,,1,0,0,,,
DP3021136193,2,28404842,+,GATTTCGTTCTAATAATGCAAACACGAGGCTCTAATGGAGCTTAACTGGA,,G,A,2,,129P3/J,substrain,129P3/J,0,A,,,1,0,0,SPIKE,,
D1H021137918,2,28447968,-,AGAGCCGAGGGAATAAATCAGTTTATTTCCACTCACCTGCTCACAGCTTA,,A,G,1,,DBA/1OlaHsd,substrain,DBA/1OlaHsd,0,G,,,1,0,0,SPIKE,,
B10020028620,2,28620030,-,GTTGTTGTTGTTTGTTTTTCGTGTAAGAGAGATGTGGGGCTCACATGCCA,,G,A,1,,C57BL/10,strain group,"C57BL/10ScCr, C57BL/10ScNHsd",0,A,,,1,0,0,,,
SNJ021145959,2,28648997,+,TGGGCCTGTGACTAGAGAACTTGTCACCTTTTGAGTTGAATGAGCTTTGT,,G,A,1,rs252718036,NOD/ShiLtJ,substrain,NOD/ShiLtJ,0,A,,,1,0,0,,CC,CC
gUNC2800194,2,28782995,+,ACAATACTCTCTTAGTTAGGGTTTCCATTGCTGTAAAGCGATACCATGAC,,T,C,4,rs226841323,,,,0,,,,1,0,0,,,
S2J021157890,2,28947254,+,ATTTCTAGCCTTCAACACCAGACAGCCACATCTTCTGCTGAGGCTGCCCA,,G,T,1,rs226767721,DBA/2J,substrain,DBA/2J,0,T,,,1,0,0,,E2,Consensus
mJAX00092566,2,29105410,+,GATGACTTTTTGTTTGTGTACCCACACAGTTAGGGGTAGTAGAAGCCCCA,,C,T,1,rs29962497,,,,0,,,,1,0,0,,,
gUNC2810208,2,29687694,-,AGAGCAGTCATTAAGAAGGAAAGCAAACCCCTCCTGTCCCTGAGAATAAA,,G,A,1,rs27183352,,,,0,,,,1,0,0,,,
S2C021205952,2,30148820,+,TGTGCTATGCTCATGTGAGTGGGGCCATCCTTAAGAGAAGCTGGGGGGTG,,G,A,1,,DBA/2NCrl,substrain,DBA/2NCrl,0,A,,,1,0,0,,,
mUNC2815389,2,30233216,-,GGCCAATTCCTGACTTACCTGGGCAACAAAAGCGGGCCGTTGTCTGAGCC,,C,T,2,rs249302063,,,,0,,,,1,0,0,,,
SFJ021210250,2,30256273,+,AAGTACTCGTTCGAGTCGATCCGAGAGGAGAGCAGCTACAGTGACATCCC,,C,T,1,rs27209219,,,,0,,,,1,0,0,,,
gUNC2826016,2,31151608,+,AGCCCTGGTACCAGGGACCTACAACCAAGTCCTTCCATTAAGTGTTAAGG,,A,G,1,rs29617766,,,,0,,,,1,0,0,,,
SFC021261099,2,31527481,+,TATGCTGGTTTCTCCCCTTAGCCACCATGACACTCTGGTCTTCTTCCTCG,,C,A,1,rs1131719413,FVB/NCrl,substrain,FVB/NCrl,0,A,,,1,0,0,,,
gUNCHS004443,2,31601489,+,GGCAGGCAGATTTCTCAGTTCCAGGGCAGCCAGTGCTACACAAAGAAACA,,C,T,4,rs230954533,,,,0,,,,1,0,0,,,
DS4021288241,2,32206034,+,CCCACCCAAAGTGGTTGAATCCTGTCTGTTTGGGAGATGAATTTGTAGGA,CCCACCCAAAGTGGTTGAATCCTGTCTGTTTGGGAGATGAATTTGTAGGT,T,A,2,,129S4/SvJaeJ,substrain,129S4/SvJaeJ,0,A,,,1,0,0,SPIKE,,
mUNC2837330,2,32287741,-,TCCCCTTCCCACGATGCGCACCCCGACCCCAAAGACCCCCACCCCATCCC,,T,C,1,rs220643953,,,,0,,,,1,0,0,,,
gUNC2842985,2,32910616,+,ACAGAGCCCACCCTCTGCCTGCCTCAGTCTCCTCCCACCTCTCCCAGACC,,C,T,1,rs33451155,,,,0,,,,1,0,0,,,
B10020032970,2,32970877,-,TGAGGTCACCGTTCTCCCTACAGTCCAGACTGTCTAGTGGCCCCTGTTCT,,G,A,1,,C57BL/10,strain group,"C57BL/10ScSnJ, C57BL/10SnJ",0,A,,,1,0,0,,,
S1J021324821,2,33120547,+,AAGTGCTATAGGACAACCAGAGCACACTACATGACAGACTTCCCAGGTCA,,C,T,1,,DBA/1J,substrain,DBA/1J,0,T,,,1,0,0,,,
SBH021332057,2,33301438,+,CTTAAAGCATTACAAGGACTTTCTCACATCGCCACTCTTTTTCAGAATCC,,C,T,1,,BALB/cAnNHsd,substrain,BALB/cAnNHsd,0,T,,,1,0,0,,,
SFH021332690,2,33317260,+,CACCTCAGCCCCTGCCCCACAGCACAGCCATCACCCACACGCAGTGCTCC,,T,C,1,rs29764659,,,,0,,,,1,0,0,,,
SAJ021338424,2,33460614,+,AAAGGCATTTCTCCATAGAGCAAGACCCTCATGACCAGTGCTCAGAAACA,,G,A,1,rs227949796,A/J,substrain,A/J,0,A,,,1,0,0,,CC,Consensus
mUNC2848293,2,33520337,-,TGGTGGTATATTATTAAGCTTGATTTATAACAGTCTAGGGCTTCTGTAGC,,G,A,1,rs33745371,,,,0,,,,1,0,0,,,
gUNC2849605,2,33670782,+,AGCAACTTGTTCTTCTTGGAGCTGGGGTTACAGGCATTTTTAGGGAAGCC,,C,T,1,rs29541241,,,,0,,,,1,0,0,,,
S3J021372375,2,34309381,+,ATGTTCATTAGTTTGCTAAAAGAAATGTTCATTCCTATTCTTCCCAATGC,,T,C,1,rs27170613,C3H/HeJ,substrain,C3H/HeJ,0,C,,,1,0,0,,,
gUNC2857265,2,34478184,+,CAGACATCTCCTTTGGGTACCTCAGAGGCAGCCCAAGAAGTCTTAAATGC,,G,A,1,rs29557592,,,,0,,,,1,0,0,,,
SFT021381098,2,34527474,-,TAGATGAGCAAGAAAAAGCGTTGCAATAATTGCAGAGGCTCTGGGTATCA,,A,G,1,rs27192081,,,,0,,,,1,0,0,,,
DS6021395916,2,34897917,-,CAGCTGAAAGGTCCGATATGCACAGGGCTGCCTGAAAATTTTGTACACTA,,G,A,3,,,,,0,,,,1,0,0,SPIKE,,
gUNC2862042,2,34946442,+,CCTCTGCCTCCTACTGAAGATTGCTTCCTGGAGAGTTCCTCATTTGCTCC,,A,G,1,rs27191399,,,,0,,,,1,0,0,,,
S6J021408007,2,35200198,+,GCCCAAACTTTTTCCCTTCGTTCTTTCTAGATGCTGTCTAGGTTCCAACC,,A,C,1,rs232917749,C57BL/6J,substrain,"C57BL/6J, C57BL/6JEiJ",0,A,,,1,0,0,,E2,E3
gJAX00093084,2,35998076,-,TGAGTAGTCACAGCTGCTGTGGTAAGATGTAGGATAGTGTTCTATATGCC,,G,A,1,rs27190111,,,,0,,,,1,0,0,,,
B10020036081,2,36081980,+,AAAAATGGAATTCCATGGCATTCTGGGTTTAAGTGCCGGCACTTCTACTC,,G,A,2,,C57BL/10,strain group,"C57BL/10ScSnJ, C57BL/10SnJ",0,A,,,1,0,0,,,
gUNC2878253,2,36241231,+,GGCACCATGATGGAACTTGTACACATGACTGAGTCAGTATCCATCTTAGC,,C,A,1,rs27144155,,,,0,,,,1,0,0,,,
D6H021472204,2,36805124,-,ATTGAATTCCTAACCTCTTCAGTGAGAAAGGTTATAGATCCAGGTCTGAG,ATTGAATTCCTAACCTCTTCAGTGAGAAAGGTTATAGATCCAGGTCTGAC,G,C,2,,C57BL/6JOlaHsd,substrain,C57BL/6JOlaHsd,0,C,,,1,0,0,SPIKE,,
gJAX00487283,2,36844897,+,GGGGCCCTTCGACCATGGGGATTTATAAAGCATTGTATACACATGGCTTC,,T,C,1,rs27160354,,,,0,,,,1,0,0,,,
DFH021477498,2,36937455,+,TGGATGCCTGTCTCAAATCTATTTCTTCCTGTGGTTCATTGGACTAGATG,,T,G,1,,FVB/NHsd,substrain,FVB/NHsd,0,G,,,1,0,0,SPIKE,,
SBH021494764,2,37369112,-,AGATACTTTTGAGAATTTTCCTAAGTTTACACTGCTAGAAGAGGTAGATG,,C,T,1,,BALB/cAnNHsd,substrain,BALB/cAnNHsd,0,T,,,1,0,0,,,
gUNCHS004645,2,37446735,-,ATTTAGTTGTCAGTCTACATTTTAAAAAATACTTCAGAGGTGGGTGTGGT,,T,C,1,rs33650064,,,,0,,,,1,0,0,,,
gUNCHS004689,2,38288225,-,TTTTTGTTTTTGTTTTTCAAGACAGGGTTTCACTGTGTAGCCCTGGCTCT,,G,A,3,rs47163773,,,,0,,,,1,0,0,,,
DAH021542532,2,38563315,+,TCTTCATTATCCATAGTGAGGATTCCATGCCTGCTCTGTGAGGGATTAAG,,C,T,1,,A/JOlaHsd,substrain,A/JOlaHsd,0,T,,,1,0,0,SPIKE,,
gUNC2896990,2,38585163,-,ACAATGCTTTTCAGGATAAGTTACATGGTCACACAGATCCCATGTATGCA,,A,G,1,rs27127669,,,,0,,,,1,0,0,,,
D6Y021560393,2,39009833,-,TGAGGGTCTATAGACTGAATGCAATGATTAGCACCTGATAGGGACTCAAT,,A,C,1,,B6N-Tyr<c-Brd>/BrdCrCrl,substrain,"B6N-Tyr<c-Brd>/BrdCrCrl, C57BL/6NCrl",0,C,,,1,0,0,SPIKE,,
gJAX00487617,2,40178934,-,TCCCTGAGGCTGTTTCCTTTCTAAAACCTACACTATCATGCCTACTTCAT,,C,T,1,rs27206037,,,,0,,,,1,0,0,,,
mUNC020306643,2,40747796,-,GAAATGGTAGTGGTACAATTAATTTCCAGCTGTGTTTGAGGTGAAATATG,,C,A,1,rs234841318,,,,0,,,,1,0,0,,,
S6Y021637601,2,40940044,+,GAGAAAGGAAAATCTAGAAACAAAGAATTTCTTAACTCTGTGATCCAAAG,,C,T,1,rs47780771,,,,0,,,,1,0,0,,,
gJAX00487704,2,40970564,+,TCTTGATAGGATTGAAGGCCTAAAATGGAAGCAAGCTGCATGACCCAGGA,,C,T,1,rs27143254,,,,0,,,,1,0,0,,,
S3J021653332,2,41333304,+,TTGGCATATGACATGGTCCTGACTGGATATCAATATGGGAAAGAGGGTGT,,C,T,1,rs586733401,C3H/HeJ,substrain,C3H/HeJ,0,T,,,1,0,0,,,
S2J021672694,2,41817367,+,TTAAGCCCAATTTTTTCCATGCTCATATGCATTTAATCACCACTGCAAAT,,G,A,1,rs47599762,DBA/2J,substrain,DBA/2J,0,A,,,1,0,0,,E2,Consensus
gUNC2932119,2,41928698,-,TGTAAGATATAAGTTAACACATGGGAAAGAAAATCACATTTAATATGTTT,,G,A,1,rs29719851,,,,0,,,,1,0,0,,,
gUNC2935160,2,42219675,+,TAGTGCATAGCGCCTGGCTTGCAGCATGTATTCAGTAATGCCAAGTTCTG,,C,T,1,rs27155807,,,,0,,,,1,0,0,,,
S6J021689509,2,42237737,+,CAGTTATGCTCAGTGACTAAAAGCAATAATGCTTTGATGCTAGACTACTA,,T,C,1,rs33185676,C57BL/6J,substrain,C57BL/6J,0,T,,,1,0,0,,E2,E3
SAJ021699416,2,42485411,-,GCAAAGCCAGAAGAGGAATTCAAGGCAAAAATTAAGAGGCAGGAATAGAT,,T,C,1,rs33050449,A/J,substrain,A/J,0,C,,,1,0,0,,CC,CC
gUNC2944490,2,42892647,+,TTTGTCTCTCCTCTCTGCGATGTTCCTTTTCTTCTCCTTCATTTCCTCTA,,T,C,1,rs27126500,,,,0,,,,1,0,0,,,
SBB021725481,2,43137047,-,TCTTGATTTCTTTAATCCATTCATAATTCAGTAAGAAGTCATTCAATCTC,,G,A,1,,BALB/c,strain group,"BALB/cByJ, BALB/cByJRj",0,A,,,1,0,0,,,
SS1021728498,2,43212469,-,CAAGATGTGCATAAATTTGTAGTAAGTGGCACTTACATATTGCTCTAATT,,C,T,1,rs222990077,129S1/SvImJ,substrain,129S1/SvImJ,0,T,,,1,0,0,,CC,CC
D6T021735367,2,43384179,-,CCTGAGTGGTCAGTCAAGGATCTAGCTTGTGAAACATCTTAAATACCAAT,,G,T,1,,C57BL/6JBomTac,substrain,C57BL/6JBomTac,0,T,,,1,0,0,SPIKE,,
gUNC2953044,2,43522480,+,CAACAAGCTATAGGAAAAATGTCACCATTAATTATCCAAAGGGCTGGAGC,,T,G,1,rs230978804,,,,0,,,,1,0,0,,,
gUNCHS004803,2,43981019,+,TATGTCTAAGGCTTTATTAATTTCCTTTTACTCCAAAAGGTGGAAAAAAA,,C,T,1,rs27140880,,,,0,,,,1,0,0,,,
B10020044238,2,44238193,-,TTTCAAGGAAGCTGGAGCATCAGTATCCTGAGCATTTACTGCACCCCCCC,,T,G,1,rs49374677,,,,0,,,,1,0,0,,,
SBR021781453,2,44536331,-,TAATCTATAGTCTCAAAACTAAGTTTGGACTGGTTCTACCCCTACTGCTT,,G,A,1,rs51136880,,,,0,,,,1,0,0,,,
gUNC2964223,2,44628004,+,TGGTTGAAGTCACTAAGTATTGAGAATGGCTGAAGATTGGAAAAAAGTAG,,T,C,1,rs27141606,,,,0,,,,1,0,0,,,
SBH021805924,2,45148114,-,ATCCTTTTATCACAAACCTGGGGCTTTCTCTCACTCTGTGCATGTACAAG,,G,T,1,,BALB/cAnNHsd,substrain,BALB/cAnNHsd,0,T,,,1,0,0,,,
SBT021816505,2,45412634,-,TTTAGAAAGCAATTTCAGACAGCTGAGGTTCAGCAAACGGGAAAAGACTA,,T,G,1,rs238856452,BALB/c,strain group,"BALB/cJ, BALB/cJBomTac",0,G,,,1,0,0,,,
SSR021819552,2,45488808,+,TTGTCTATGAAGAGGTTTCCAAACATGGTCGATATGTGGGATCATAGCCT,,G,A,1,rs244044969,129S2/SvPasOrlRj,substrain,129S2/SvPasOrlRj,0,A,,,1,0,0,,,
gICR1009,2,45755473,+,TCAGGACACAAATTTTGTTCTTAATCATGTTAGCAAAATTTGGGGGAGGG,,G,A,2,,,,,0,,,,1,0,0,,,
S3J021841101,2,46027536,-,CTCTGGGAAAGAGCCTTTTCATTTTAACAACTGGGAGAGTGAGGAAGGGA,,C,T,1,rs265695555,C3H/HeJ,substrain,C3H/HeJ,0,T,,,1,0,0,,,
S3J021852202,2,46305056,+,AATAAATCCTGCTGGAAACAGCTATTGGGTATTTCTCATGTGACTTTAGT,,C,T,1,rs220319681,C3H/HeJ,substrain,C3H/HeJ,0,T,,,1,0,0,,,
S2C021859097,2,46477432,+,TAGCCATCAATATGATTGGAGATCTGAGATAGATATGTTGTATGTAAATG,,G,A,1,,DBA/2,strain group,"DBA/2NCrl, DBA/2NTac",0,A,,,1,0,0,,,
mJAX00093867,2,46603861,-,TATTCAAGGGGAGTCCCAGTGAGTTTCAGTATTGATAGAGTAGTAGAAGC,,A,G,4,rs33463036,,,,0,,,,1,0,0,,,
SBC021868182,2,46704553,-,GGGACTTAGCAGGTTGTATTTACAAATGTGTGCATGTGTGACAATAATAA,,G,A,1,rs47698670,,,,0,,,,1,0,0,,,
gUNC2987801,2,47159732,-,GAAAACAAAAAGCTGGTGAAGATAAAATAGAACAAGAAGGTCATGTTCCA,,T,C,1,rs29722660,,,,0,,,,1,0,0,,,
gUNC2998289,2,47998974,+,ACTCATTACTTGATCACAATTTCAAATAACATCTAGTATTTAGGATTTTA,,C,T,1,rs48903266,,,,0,,,,1,0,0,,,
S3J021922102,2,48052561,+,AGACCATATATTCAAGAATGTTTTGACAACATAAACTCTCCTTGATAGAA,,G,T,3,rs263121914,,,,0,,,,1,0,0,,,
mJAX00488677,2,48061576,+,GAAAAGACAGAGAAGGGTGGTAGAGTGTGAAAAAAAATTCAGAGATGCTC,,A,G,1,rs27956342,,,,0,,,,1,0,0,,,
SFC021948262,2,48706558,+,ACTGACAAGTGTGTTGACATCAGGCAATAAACACAACTGACCAGTATTCG,,C,A,1,rs1133086645,FVB/NCrl,substrain,FVB/NCrl,0,A,,,1,0,0,,,
SFJ021950001,2,48750047,+,GTCTAGAGAAGAGAAGCTCCAAACAGCTGTTTAACCTCATACTCACTGAG,,C,A,1,rs27932495,FVB/NJ,substrain,FVB/NJ,0,A,,,1,0,0,,,
S1L021951235,2,48780889,-,TTTCAGATGTCTCCTGAACTCAGCACTGACTAGCCATCATCATGTGAAAT,,A,C,1,,DBA/1LacJ,substrain,DBA/1LacJ,0,C,,,1,0,0,,,
SS6021955394,2,48884874,-,ACTTCCTAACTAATGGAGAGAGTAAGCTATAAAACATCCAACACAAAAAC,,C,A,3,rs237484283,,,,0,,,,1,0,0,,,
gUNC3010578,2,49120583,-,TTCTTAATATTGTGGGGAAAACATAAATTAATCTGACACTGATAGGTGGT,,T,C,1,rs27901508,,,,0,,,,1,0,0,,,
B10020049612,2,49612984,+,AGCAGGTGAAGGGGGAAGGCAAAGGTCTGAGAGACATCTTGCACTCTGAG,,G,A,1,,C57BL/10,strain group,"C57BL/10ScCr, C57BL/10ScNHsd",0,A,,,1,0,0,,,
mbackupJAX00094100,2,49678338,+,TGTTTGTGCCCTCTAAAGAAACACTCTCCCAGTCGATCCGAGACTTGATG,,T,C,1,rs33090910,,,,0,,,,1,0,0,,,
gUNCHS004928,2,50945941,-,TGGACCCAAAGTAGGGGTGAGTAGCGGACTGGGGGTAGAGGAGAGGACAA,,G,A,1,rs27930873,,,,0,,,,1,0,0,,,
B10020051054,2,51054570,+,GAGGAATAAAGTAGATGAAAGCATGCAATCCATGAGAAGCCATAGGAAGG,,G,A,1,,C57BL/10,strain group,"C57BL/10ScCr, C57BL/10ScNHsd",0,A,,,1,0,0,,,
SBT022045776,2,51144404,-,GCCATGTCTTCCTCTCACTGAGGTATAGTTTCTTTTCCTTATAAAATGAG,,G,A,1,rs33341309,,,,0,,,,1,0,0,,,
gUNC3043685,2,51385891,-,TTGCTCATATTTCTAATGAGGAATTAGCTGAAAGCACTAAATCACCATCA,,G,T,1,rs27929347,,,,0,,,,1,0,0,,,
S3R022073208,2,51830220,+,CATGTAATTCATTTGTGAGTCCCCCGTGAAGTGTATGGGTAGGAAATTAT,,G,T,1,,C3H/He,strain group,"C3H/HeNRj, C3H/HeNTac",0,T,,,1,0,0,,,
gUNC3051114,2,51830440,-,CAGCAGAGGGAGCTCCAATCAGGAAACACGAAGGAGGAAAAGAAATGAAG,,G,A,1,rs33606246,,,,0,,,,1,0,0,,,
SFT022079038,2,51975953,-,ATGTAGCATTCCCTAATCACATCTAAAGACATAGTTTATAAATGAGTTAT,,T,C,1,rs50886156,,,,0,,,,1,0,0,,,
S1J022085299,2,52132492,-,GACTCTCCAGTATAGAAATGTCTCTCTCAGTAGCTTCAATCTTGTTGCTT,,G,A,1,,DBA/1J,substrain,DBA/1J,0,A,,,1,0,0,,,
gJAX00489448,2,52219270,-,TGGGCAGCAAACGTGTTGAAGATGCAAAATGACAGGCTGTACAAAAAAGC,,A,G,1,rs27928376,,,,0,,,,1,0,0,,,
DSB022113379,2,52834496,-,CTCAGAATTGGGAGTGTCTGTAGATACAACCTTGAGAAGCCTCTTCAAAG,,G,A,3,,,,,0,,,,1,0,0,SPIKE,,
mUNC3068322,2,53071636,+,GGACTAGCTAGTTTGTATGGCGTTATGGGGAAGTGTGCATCAAAATGGCC,,G,A,1,rs48687667,,,,0,,,,1,0,0,,,
D3N022134994,2,53374873,-,TATAAGCTTCAGGCTTTTCAGGCCTGCTGTTTATTTGCTCTGTGTTGTAA,,C,A,1,,C3H/HeNHsd,substrain,C3H/HeNHsd,0,A,,,1,0,0,SPIKE,,
gUNC3077062,2,53736354,-,GCAAAGGCAGTGGTTATTTCTGTGAATTTTCAGACAGCCTGATCTACATA,,C,T,1,rs29539136,,,,0,,,,1,0,0,,,
D3C022168052,2,54201301,-,CAAAGCTCAAGAAGAATCCATACTTGAGCTCACCTTAGGCCATATAAAAC,,G,A,1,,C3H/HeNCrl,substrain,C3H/HeNCrl,0,A,,,1,0,0,SPIKE,,
DZO022168614,2,54215373,+,GAGAGTCAGAGTCCAAAGTGTCATGACGGCTTTAGCCAGAGGAAAGTTTA,,T,C,1,,NZO,strain group,NZO/HlLtJ,0,C,,,1,0,0,SPIKE,,
gUNC3088407,2,54585944,+,CTTTTCCACTTAGTACATAGGAGGAGTGAATTAGATCTTGGACAACAGGA,,A,G,1,rs27926016,,,,0,,,,1,0,0,,,
gUNC3090814,2,54806366,+,TCTTTATATCACATGATGATTTTTATAGGAATAAAAGGTTTGATCAGTTC,,A,G,1,rs46757144,,,,0,,,,1,0,0,,,
SBH022193729,2,54843225,+,AGATGTTTTTAAATCTCATTACCCATGTATGACCACATCACTATTTTAAT,,C,T,1,,BALB/cAnNHsd,substrain,BALB/cAnNHsd,0,T,,,1,0,0,,,
gUNC3103316,2,55795769,-,TATTGTTGACAGAAAATGTTTTCTGGCTGGGCACAGAGTCTGCGGACACC,,G,T,3,rs33322296,,,,0,,,,1,0,0,,,
gUNC3104097,2,55855423,+,TTTTAAAGCCAATGCCCACCTCTGTGCTACATTCCTAATGCACTTAAATA,,T,G,1,rs27907121,,,,0,,,,1,0,0,,,
gJAX00490113,2,56552082,-,TCAGCTTTACTTCTTTTTACAGAGGGATAGTAAGCATCTCCTTTCCAAGA,,G,A,1,rs27908032,,,,0,,,,1,0,0,,,
SFJ022279637,2,56990939,-,ATTGTCTAAACACACCCCTCCGTCCACCTAGGTCTCATGTGTGCACAGTG,,G,A,1,rs27909155,FVB/NJ,substrain,FVB/NJ,0,A,,,1,0,0,,,
mUNC3118371,2,57182391,+,TCTTCATTAATGTTAATATTTTAGAAAAACAAGATTTGAAACAAAAAGGC,,A,G,1,rs46538892,,,,0,,,,1,0,0,,,
UNC3120836,2,57347747,-,CTCTGACAAAAGGAAAGATTAGAAAGATAAAAAACCGTTGGTGGTGCACG,,A,G,1,rs32961066,,,,0,,,,1,0,0,,,
mUNC3124756,2,57777470,-,AAAAAGCTGTTCATGCTGCTGTCAACACTGATGCTTGTCTCCCATCCCTC,,A,G,1,rs32916566,,,,0,,,,1,0,0,,,
SBC022343175,2,58579395,-,ACTGAAGTGGGTTCAAGTTTTTGCTCTCTCGTCTTCTCTGGGGTCTTTAA,,C,T,1,,BALB/cAnNCrl,substrain,BALB/cAnNCrl,0,T,,,1,0,0,,,
S2J022346383,2,58659584,+,GGTGATAATGTTTTTGCTAGGTGTCTGGACCATAATAAGAGTACAGTAAA,,C,T,1,rs13476524,DBA/2J,substrain,DBA/2J,0,T,,,1,0,0,,E2,Consensus
mUNC020395186,2,58662484,-,TAAATTATGAGTCATCGGCAGACGACACTAATGCAGATTATACCCCCCCC,,G,T,1,rs29820051,,,,0,,,,1,0,0,,,
UNC020395186,2,58662484,-,TAAATTATGAGTCATCGGCAGACGACACTAATGCAGATTATACCCCCCCC,,G,T,1,rs29820051,,,,0,,,,1,0,0,,,
S2J022372552,2,59313815,-,AAAGACTAAAATCCACCGCAACAATGAAAAACAAACAACACCCACCAGAC,,G,T,1,rs33596005,DBA/2J,substrain,DBA/2J,0,T,,,1,0,0,,E3,Consensus
gUNC3152204,2,59782171,+,CCATATTTAGAAATAACTTTAACATTTTGTTTTTATTTTGAATTTGTATA,,G,T,1,rs6356670,,,,0,,,,1,0,0,,,
gUNC3159715,2,60441119,+,CACAAGAAGAAATTTACCTTATAGTTAAAATACAGCCACCCCTTGGGGCA,,T,C,1,rs13476531,,,,0,,,,1,0,0,,,
SS1022430815,2,60770391,-,GTTGGCTAGAAGCAGGGCACCGCAGGAAGCAGTGTGCATGGAGTGGTGGG,,G,A,1,rs240218238,,,,0,,,,1,0,0,,,
gUNC3168121,2,61079400,-,CTTGGCTCCTGTTCTGTACTTTCTATGAAGCAATGCTGGCTAGGTGTGGT,,T,C,1,rs29863279,,,,0,,,,1,0,0,,,
S2J022453030,2,61325752,-,GCAGGCTTTCTTGTTTTGTATGATTTATCCCCTAGTTTTCTTACATGTTA,,A,G,1,rs33466674,DBA/2J,substrain,DBA/2J,0,G,,,1,0,0,,E2,E2
mUNC3175666,2,61720963,+,GTCATCAGAAACAGCACCGGGAAAGTAGATAAACTAACACAGCTGGGAGC,,T,C,1,rs29770764,,,,0,,,,1,0,0,,,
DS6022472175,2,61804394,+,CACCCCCCAAGCCAACAATAAAATCATCCCCTTCAATTTGCCATGATCGT,,C,A,1,,129S6/SvEvTac,substrain,129S6/SvEvTac,0,A,,,1,0,0,SPIKE,,
gUNC3179577,2,62213025,+,CAATGTGCTAAGTTTGTCCTTGATTAAAGATGTTGAACTTGTGTGTGGGG,,A,G,1,rs234714904,,,,0,,,,1,0,0,,,
SBH022499235,2,62480889,-,ATGGATAAGGTGCCACTCAGGCTAACCATATGCAGCATATCATCTACAGA,,C,T,1,,BALB/cAnNHsd,substrain,BALB/cAnNHsd,0,T,,,1,0,0,,,
gUNC3184173,2,62649086,+,ATTTCCAAGTTTTCATTATAATTTTTAACACTGAAGGAGCAAAGGAGGGA,,G,T,1,rs48030416,,,,0,,,,1,0,0,,,
S2H022509582,2,62739568,-,ATTCACAGAACAATATGGAGTTAAAACTTCTGATATGTTTATCAAACCAA,,C,T,1,rs1134456067,,,,0,,,,1,0,0,,,
gUNC3194074,2,63333340,+,AGTTTCTGATTAGACAGAAACTGTTCCATCTCCAGGGAAGAACATGCAGC,,G,A,1,rs231540194,,,,0,,,,1,0,0,,,
S2R022539142,2,63478558,+,ATAGCTACAATAAAATGTAGTTTTGAGTTGTCTTCTTATATGCCAGATTA,,C,T,2,,DBA/2JRj,substrain,DBA/2JRj,0,T,,,1,0,0,,,
SFT022540510,2,63512766,+,AAGTAATTGTTAGTGACACAATACACCCCTAGTTTGTAATTTAATAAAAT,,G,T,1,rs247462890,,,,0,,,,1,0,0,,,
SBB022550690,2,63767258,-,TATTGATTTGAAGATTTAACATGGTATTGATTGCTGATTGAGAGTGGTCT,,A,G,1,,BALB/c,strain group,"BALB/cByJ, BALB/cByJRj",0,G,,,1,0,0,,,
mUNC3202883,2,64177413,-,TGGTATCTTCTGACCACTTAATCACTGTGGGTAACAAACAGATCTAAGGT,,G,A,1,rs247936471,,,,0,,,,1,0,0,,,
gUNC3205421,2,64490517,+,GGAACTTGGAGGCAGGAACCTAAGCAGAGACCATGAAGGAATGCTATTTT,,A,C,1,rs220089417,,,,0,,,,1,0,0,,,
B10020064841,2,64841240,-,ACCTTATCTGGTACACACTGTTGCAATCTGTGATGAAATCCTTCATGTCC,,G,A,1,,C57BL/10,strain group,"C57BL/10ScSnJ, C57BL/10SnJ",0,A,,,1,0,0,,,
gUNC3214809,2,65240067,-,CCATTTCATATTCAAAGATGTACTGAGACCATATTCACCACAAGGGAGAG,,C,A,1,rs33364760,,,,0,,,,1,0,0,,,
S6Y022619844,2,65496107,-,GTTCTCCTACTACATGAGGAAACTCAGTAATTACATTTTAGGCTAAAAAT,,C,T,1,rs27995404,,,,0,,,,1,0,0,,,
gUNC3223501,2,65844683,+,AGTCATTGTCTCTTTCTAATACATGGAGCCCGGGGATTAAACTCAGGTTG,,T,C,1,rs33749848,,,,0,,,,1,0,0,,,
mUNC020087824,2,66258021,-,CTCCACTGAAACTCAAAAGGCTTATATGATGCTCAAAAATGTGGAAACTG,,C,T,1,rs237045862,,,,0,,,,1,0,0,,,
gUNC3230084,2,66318283,+,AAGGTTGTCTGCACTAAATGAGCTCAGAAGCAAGGCCAGAAAGAGGTTCA,,A,G,1,rs48117280,,,,0,,,,1,0,0,,,
SBT022654821,2,66370548,-,AATTATTTACAATGTTTCAGGACCACATACAATTATACTTTGTCAGCTGC,,G,T,2,,BALB/cJBomTac,substrain,BALB/cJBomTac,0,T,,,1,0,0,,,
S6Y022660828,2,66520708,-,CATTGTGCAATGAGGAAAGCAAAGTGTTATGCTGAAAGAGTCACACCCCA,,C,T,1,rs28035618,,,,0,,,,1,0,0,,,
gUNCHS005211,2,66579376,+,GGGTGGTTGTGATATTGCATTATTCATGAGAAGGTCTGATAGAGCAGAAT,,C,T,4,rs33372228,,,,0,,,,1,0,0,,,
gUNC3234516,2,66597171,+,TTCTGAATTCCATTTTCCTCCTTTGTGTTGGTTTGTGCCAGTGAGACCAA,,A,C,1,rs3669432,,,,0,,,,1,0,0,,,
mUNC020089575,2,66925342,-,TTGCTTTTGACTTGGCTCCATTCTTTCTCTCGTCATCTAACCCCTCTTCT,,A,G,1,rs50249662,,,,0,,,,1,0,0,,,
UNC3239202,2,66928955,+,GTTAGTTCTTCAGATCCTCTTTGGTTAACTGCATTTGCTCCATAATTTAT,,T,C,1,rs28007252,,,,0,,,,1,0,0,,,
UNC3247099,2,67468649,+,CATGCAAATATTAAAATTATAGAAAGAGGTACTCCTGCTAATGGATCTGA,,A,G,1,rs27962224,,,,0,,,,1,0,0,,,
gUNCJPD000774,2,67598625,+,TACATGATATTTTAACATGATATATGCATTTCATGTTCAAATAAAACAAT,,G,A,1,rs1133482502,,,,0,,,,1,0,0,,,
UNC3251467,2,67741653,-,TCAAGTTTTATGAAAGACTGATTGCCATTAACTTTCTATTGGTTGAATTA,,G,A,1,rs27958375,,,,0,,,,1,0,0,,,
gUNC3252670,2,67803309,+,TGGCATCTTTACTTCCCCATTTGACATATCTTAACTATAAGAGAGCCCGG,,G,A,1,rs33760387,,,,0,,,,1,0,0,,,
UNC3254350,2,67925036,+,CAGCATTCTATTTAAGGTTGGTTTTGTAGACATGGTTACTTTTTTATGCT,,A,G,1,rs225203922,,,,0,,,,1,0,0,,,
SX1022720755,2,68018891,+,AATCAGGTTGAGATATCTGGTAAGCTAGTAAGGGGTGAAAGTACAAAGTG,,T,C,1,rs27990097,,,,0,,,,1,0,0,,,
SFJ022731375,2,68284397,-,AGCATTCATTTTGATAGCACACACTGTGAAGGTTCAGATACTTTGTGCTT,,C,A,1,rs387723142,FVB/NJ,substrain,FVB/NJ,0,A,,,1,0,0,,,
gUNC3266951,2,68804831,+,CATCAAGAACTAACCTGCCAAGGATTCCCAAGACGTACTCTCTATCAGGA,,T,C,1,rs27988512,,,,0,,,,1,0,0,,,
gUNC3267830,2,68869729,-,CTTGTACGCCCTCTGCCATGCTGATTAACAAACTGGTTTGCCAGCCTTGG,,G,A,1,rs33166269,,,,0,,,,1,0,0,,,
UNC3267830,2,68869729,-,CTTGTACGCCCTCTGCCATGCTGATTAACAAACTGGTTTGCCAGCCTTGG,,G,A,1,rs33166269,,,,0,,,,1,0,0,,,
gUNC3268280,2,68894430,-,AATTAAAAATATAATAAAAGAAGGAGGTTCAGGAGAAATGTCCCAAAGAC,,A,G,1,rs219853816,,,,0,,,,1,0,0,,,
UNC3268533,2,68909203,+,TTACATCCTGTTCTAAATATTTGCTTCTTATGTTTTCTGTTGACATTGGG,,G,A,1,rs27973423,,,,0,,,,1,0,0,,,
SFH022759780,2,68994508,-,CAGCTGTCCCACTGGAGGAATCACATCATGACTCTGGCTCTCTCTTGAAT,,C,T,1,rs50207175,,,,0,,,,1,0,0,,,
SFJ022759836,2,68995908,-,TTTTGCAACATCTCTTCTTTATGCCCCTTGTCTGACCATTCTCTGGTTCC,,G,A,1,rs387791875,FVB/NJ,substrain,FVB/NJ,0,A,,,1,0,0,,,
S3J022765013,2,69125349,+,AGAACCATGAGTGATCACCAGACACACCCAATGGGAAAGACATTTTGTAA,,A,G,1,rs241317191,C3H/HeJ,substrain,C3H/HeJ,0,G,,,1,0,0,,,
S2C022765884,2,69147114,+,GAGTGATGGGACTCGGAGGTCACTGCCTTACACTACTGTGCTTGAACTGA,,C,T,1,,DBA/2NCrl,substrain,DBA/2NCrl,0,T,,,1,0,0,,,
UNC3272772,2,69186088,-,GATCTGATTCTTTAGAGTGACCCTCAGTTCTTTTCTGAGATATCAGGGCA,,C,T,1,rs27976252,,,,0,,,,1,0,0,,,
SX1022779779,2,69494475,-,GTTACTGAGAATCACATTGCTAAGCCAGAGGGCCTCATAGAAAAGTGAAT,,C,T,1,rs46136697,,,,0,,,,1,0,0,,,
UNC3278066,2,69517912,-,TGATACCTCTCATTTATTTTCAAGACAAATCATAATCAGAGTTGGCTTTA,,A,G,1,rs27989266,,,,0,,,,1,0,0,,,
gUNC3278810,2,69563127,+,ACAAGGCTTTTGTTGAAGCCAAAAGTCTCATCAGGTTGAGACTCTTTCTA,,C,T,1,rs47533648,,,,0,,,,1,0,0,,,
UNC3279845,2,69632025,-,CTACCTCAGAACACAACATCACAATGTGCTTGGGTGTGACTCTTCAATCA,,A,G,1,rs27973941,,,,0,,,,1,0,0,,,
gUNC3282025,2,69816588,+,TTGAAACTAGCTCTAGGGGATAGTTAGAGATTTCCCTTTAACGTCTCATA,,T,C,1,rs33188023,,,,0,,,,1,0,0,,,
gUNC3284740,2,70054248,+,CATCCAAACAGGAATGCATTCGTATAGGCCTCACTCATTAAAGCTTCTGA,,C,T,1,rs33353160,,,,0,,,,1,0,0,,,
B10020070362,2,70362354,+,GAAACTGGGAAACTTCGAGTCATGGCCCTGTGCCCCATGGGGATGAACAG,,G,A,1,,C57BL/10,strain group,"C57BL/10ScSnJ, C57BL/10SnJ",0,A,,,1,0,0,,,
UNC3290343,2,70397591,-,GCTGAGCTGGTCTCAGTGTAGTGAAGTCAACAGTAGCATGTTGTTGAGCT,,G,A,1,rs27961860,,,,0,,,,1,0,0,,,
SNJ022819537,2,70488441,-,GGAGGTTTTAGTACAACCAGGGTTACACAGAAAAACCAACCAAACACACA,,A,C,1,rs581662891,NOD/ShiLtJ,substrain,NOD/ShiLtJ,0,C,,,1,0,0,,CC,CC
gUNC3291948,2,70515362,+,CTTTTTAGCTCTGTTCTCTCTCAAATTTACCCTGCACCAAATTTCTGGGA,,T,C,1,rs108209030,,,,0,,,,1,0,0,,,
gUNC3294360,2,70716531,+,CTTAACTGAGTGCTTAACTGAGTGCTTAACGATGGAGACCAGCCAAGCAG,,T,C,1,rs27976967,,,,0,,,,1,0,0,,,
S3R022843244,2,71081123,+,CAAGGTAGAAGCACAAATCAAGAGCCTATAGATGAGTTGTCTGTCTACAG,,A,C,1,rs27971853,,,,0,,,,1,0,0,,,
gUNC3300936,2,71270713,+,GAGGAAAGGCAGATGTGGGAAACAAAACCATTGACTGCAAGGCTGAAAGA,,T,C,1,rs28322634,,,,0,,,,1,0,0,,,
SAC022853530,2,71338272,-,AGAGTAGAAGGGGAACAGAAAGTCAGGGAACGGAGAAAACGGGATGACTG,,A,C,1,,A/JCr,substrain,A/JCr,0,C,,,1,0,0,,,
gUNC3308187,2,71779533,-,CCAGTCACATGTGAGACTGGGGTGTTTATATATAAACACACGCTCCTCTG,,A,G,1,rs27952589,,,,0,,,,1,0,0,,,
SFT022884953,2,72123828,+,CACAGCTGTCACCTCACAGTCAGTTAACCCCACCCCCTTATTGCTCTAGT,,C,T,1,rs48009130,,,,0,,,,1,0,0,,,
gUNC3316097,2,72368577,+,AAGCCAGCACAGCGCTTTCCTCTGTTTGTGTGACTCATCGCTAGGTTCAC,,G,A,1,rs27985887,,,,0,,,,1,0,0,,,
DP3022897167,2,72429189,+,CGTCACCATGGATGAGAACCAAGCTTTGAAATTAAAATCCAGGGTAATCG,,G,A,2,,129P3/J,substrain,129P3/J,0,A,,,1,0,0,SPIKE,,
DS4022897203,2,72430099,-,CTCAAACCCAGTGCTGGTAGCCATCACGATGACTTGTTTTATTAAACAGT,CTCAAACCCAGTGCTGGTAGCCATCACGATGACTTGTTTTATTAAACAGA,T,A,2,,129S4/SvJaeJ,substrain,129S4/SvJaeJ,0,A,,,1,0,0,SPIKE,,
D2R022902059,2,72551489,-,AGGAAGGAAGTGGCTATGGTTTTAGGAAGCTTTGAGAGAAACCCTATCCA,,C,T,3,,,,,0,,,,1,0,0,SPIKE,,
DFT022903359,2,72583980,+,GTCTTCCTAAGAAATGGTGGGTTAATGCTTTTTAACAAGGCTGTGTATTC,,C,T,1,,FVB/NTac,substrain,FVB/NTac,0,T,,,1,0,0,SPIKE,,
mUNC3319811,2,72657047,+,ATAACGACACAGCACAGAGTGTTTGCAGAACGCACACGGTGTTGTGTGGT,,G,A,1,rs230576912,,,,0,,,,1,0,0,,,
gUNCHS005379,2,73687306,+,TGGTGATAGAGGACTTTAAAAAACCAAGATATTCCATGACAAAATCAAAT,,G,T,4,rs214630368,,,,0,,,,1,0,0,,,
S3J022969267,2,74231682,+,ACAATAGCCAGGTCAACGACCCGTGATGCCTGAATATGAAATCCTCGGGG,,G,A,1,rs28000398,C3H/HeJ,substrain,C3H/HeJ,0,A,,,1,0,0,,,
gUNC3338557,2,74392681,-,CCTCTTTAACATGTTAGTTTGAATCGCATGCACAAATGAATGCTATTTTG,,C,T,1,rs33636855,,,,0,,,,1,0,0,,,
gUNC3339978,2,74541842,-,AAATCAGATATTGGTTGATTATTTCCTTAAGCTTTGCCCCACCATTGTAC,,T,C,1,rs33697749,,,,0,,,,1,0,0,,,
SBH022991433,2,74785827,-,TGAGTCAGGCTTCCATACCTTTCTCAGACCCTCATTTCCCCTTCTCCTCC,,C,T,1,,BALB/c,strain group,"BALB/cAnNCrl, BALB/cAnNHsd",0,T,,,1,0,0,,,
S3J023003848,2,75096208,-,ACTCTGGTGCAGCTCCTGGTCTCACATGCTCCACTTGCTGTGTAGCAGCA,,C,T,1,rs219762428,,,,0,,,,1,0,0,,,
B10020075481,2,75481359,-,GTCCAAGACATATTTGCTCTTAATGTTTCTTCTCCTCACATGAGCACAAA,,C,T,1,,C57BL/10,strain group,"C57BL/10ScCr, C57BL/10ScNHsd",0,T,,,1,0,0,,,
gUNC3351416,2,75576689,-,TGCTCCATTCCTCTCATGGTTAAGAGGAGCCACATGGCTGAGGGTAGATC,,T,C,1,rs27946252,,,,0,,,,1,0,0,,,
gUNC3353430,2,75731132,-,TTGGTTGTTTAGCAGTTGTTTTCTGTTTCCATGGCCTCTTCTGCTTTCTG,,A,G,1,rs27978247,,,,0,,,,1,0,0,,,
SFR023052815,2,76320388,+,TATTGTATAGATGGAATTTCTGCAAAGAGAACATTAAAATGGGCTAGATG,,G,T,2,,FVB/NRj,substrain,FVB/NRj,0,T,,,1,0,0,,,
S6Y023054737,2,76368440,-,AAGGACTGGGTTAGCCTTTAGTAGCACAGGAATCGCAGAGCTGGGCTAGG,,C,T,1,rs27965854,,,,0,,,,1,0,0,,,
gUNC3367467,2,76659860,+,GATTTCTGGCTTGGTCGAAAGATCCAAGATTTTTTTATAGCAATTTTTCT,,T,C,1,rs252474671,,,,0,,,,1,0,0,,,
DS6023072430,2,76810769,-,GGAGGTCCCATATGTGTAAATTCCGTGTATGTTCTCTCTTCATAGGACTG,,G,A,1,,129S,strain group,"129S4/SvJaeJ, 129S6/SvEvTac",0,A,,,1,0,0,SPIKE,,
S1J023078864,2,76971606,+,TATCTACAACAAGAATCAAAATTAAGCCGTGGAACATTTTAGGAAGGAGT,,C,T,1,,DBA/1J,substrain,DBA/1J,0,T,,,1,0,0,,,
DP2023082075,2,77051881,+,TGAATGAAATTCAGATTCTTCAGCTGACTGGCAAGAAGTCCGGAAAGATC,,G,A,1,,129P2/OlaHsd,substrain,129P2/OlaHsd,0,A,,,1,0,0,SPIKE,,
mUNC020103640,2,77364192,+,TCAGGGAACTTGTTTTGAAATCTACACTGCACTGTTTACTGAAAATAAAA,,T,C,1,rs27948912,,,,0,,,,1,0,0,,,
gJAX00493970,2,77875006,-,TAACTCGGCATTCAGCAAGGTCAATCTTGTCCCTGTATACTGATGACACA,,C,T,1,rs27980963,,,,0,,,,1,0,0,,,
gUNC3390481,2,78562849,-,TATGTATTTACTTATTTATTTAGATAAGGGTTCTTGATATATAGTGCAGG,,T,G,1,rs230559250,,,,0,,,,1,0,0,,,
gbackupUNC020104494,2,78946101,-,TCTTCACTGAACGGGTAATGGGGTTAAATGTTTGAGATTTTAACAGCACC,,C,T,1,rs27976050,,,,0,,,,1,0,0,,,
ST2023174930,2,79373270,+,AGCTCCCCTCCTGGGAGGCAAACACTGAGAAGGCTCTGGGAATCCTTCCA,,T,C,1,,129T2/SvEmsJ,substrain,129T2/SvEmsJ,0,C,,,1,0,0,,,
gUNCHS005561,2,79659301,+,AGTGCTACTGGGCAGCAGAGCCTTCAGGGTCTCAGGATCCTTGAACTTTG,,G,A,1,rs6330015,,,,0,,,,1,0,0,,,
S2C023201218,2,80030458,+,TTAGGAATCATATATATTAATGTTTTTAGGAAAGTCAATCCCTCATTTAT,,G,T,1,,DBA/2NCrl,substrain,DBA/2NCrl,0,T,,,1,0,0,,,
B10020080039,2,80039160,+,TATTTTACAATGTTGCTTTCACACTGGATGAAGTGTGGGGACAAGACATC,,G,A,1,,,,,0,,,,1,0,0,,,
ST2023203727,2,80093191,+,AAAAAGCAGAAAAGGTAAAATTTTACATTTGGATGTCCACCTCATTTGTC,,G,A,1,rs244458162,,,,0,,,,1,0,0,,,
mUNC3410857,2,80165943,+,TCATAGAAAGTGCCAGAACCTGCCCCATCATACTTCTAATATTCTCATGT,,G,T,1,rs28315925,,,,0,,,,1,0,0,,,
gUNC3415704,2,80641256,+,TCTCTGAATACAATAAATCATACAAAGGCTTACTCCCTAAGCCAGAAAAT,,G,T,1,rs32946035,,,,0,,,,1,0,0,,,
S3R023247232,2,81180818,+,GATGTAGGATATGAGACTATCCTGGATTTACAGAAGGTGATCAATAGTAC,,T,G,2,,C3H/HeNRj,substrain,C3H/HeNRj,0,G,,,1,0,0,,,
gJAX00096462,2,81300983,+,TAGTGAGGGATTCCTGTGGAGTGGGGTATGAGATTCTCTGTCACTATTGA,,C,T,1,rs28323888,,,,0,,,,1,0,0,,,
S2R023265838,2,81645974,-,GCTTGCTACAATTTCCTATAAGTTTGGTGTGTTTTCCCCAAGAAAGAAGA,,G,A,1,rs28042343,,,,0,,,,1,0,0,,,
gUNC3425213,2,81730847,+,ATCCTCTGCTACATATGCAGCGGGAGCCATGGGTCCCTCCATGTGTAGTC,,C,A,3,rs29722654,,,,0,,,,1,0,0,,,
ST2023290065,2,82251628,+,ATCAATTTGATTACAATATTTTTGCTTTCAAGAAATTATCTGATGATGGC,,C,T,1,rs218135502,,,,0,,,,1,0,0,,,
S3J023300520,2,82513010,+,TTAACTGTGCCATATAGCCAAGACCTATAACAGTTCCACCATCTGAATTT,,G,T,1,rs221340543,C3H/HeJ,substrain,C3H/HeJ,0,T,,,1,0,0,,,
gUNC3434180,2,82618251,+,AAAAGAAAAAAGAAATATTAGTATGTATCTCCTTGGGAACAAAAAAAAAG,,A,C,1,rs33123511,,,,0,,,,1,0,0,,,
gUNC3435709,2,82816566,-,CTCTGTTACTGATCATTACATTTTATAGAGATTAGATAATATCTTGTAAA,,C,T,1,rs248050882,,,,0,,,,1,0,0,,,
SBB023323889,2,83097239,+,TTATATAGAGATATTACCTGTAACGTCAATGATTAAGAAAAAGGAAAGAA,,A,G,1,,BALB/c,strain group,"BALB/cByJ, BALB/cByJRj",0,G,,,1,0,0,,,
SBH023332665,2,83316645,+,AGGCAGGGCTCCTTTGCTAAATTCCACTTTGTATAAGGTAGTGTTTCTTG,,C,T,1,,BALB/cAnNHsd,substrain,BALB/cAnNHsd,0,T,,,1,0,0,,,
gJAX00494942,2,83788703,-,TGGCTGTTCAGTAAGAACTGTGCATCAGGGTTAGTTTTATAATGTAACGC,,A,C,1,rs28066454,,,,0,,,,1,0,0,,,
gUNC3447687,2,84108695,-,TCTCCTCTGTGACTTTCTGTCAGGTGACCCTTTACTTTCTACAATGTTGG,,A,G,1,rs49705702,,,,0,,,,1,0,0,,,
SBC023368718,2,84217950,-,CCTAGAAGTGAAGCTAACCAAAGTTTCAATCTAGTGAATGTTATACAAAC,,T,G,1,rs50727756,,,,0,,,,1,0,0,,,
S3C023369883,2,84247078,-,TATTTAAAGAGCCAAGAGTTTTCTAATTTTAGATACTTAAAGAACAAGAC,,G,T,1,rs48622011,,,,0,,,,1,0,0,,,
mUNC020423988,2,84701151,+,TCCTTTATAACCTGGGTCTGGGCTTTTTTTTTTTTTTTAAAGATTTATTT,,C,A,4,rs243209871,,,,0,,,,1,0,0,,,
S2T023394984,2,84874613,+,GGTATAGGTATGTCCATGGGGAGTGGACTCTGTATTTTAATTAACCAGCT,,T,C,1,,DBA/2NTac,substrain,DBA/2NTac,0,C,,,1,0,0,,,
B10020085328,2,85328173,-,AGAGATATTTGATGGATCTAAAAGAATAATACTGCAATAGAAGCTTTTTT,AGAGATATTTGATGGATCTAAAAGAATAATACTGCAATAGAAGCTTTTTA,A,T,1,,C57BL/10,strain group,"C57BL/10ScCr, C57BL/10ScNHsd",0,T,,,1,0,0,,,
gICR5045,2,85336432,-,ATATAGGTAGTTACAGCACCACATATATCATTTTTCATAGACCTAAGTGC,,G,A,3,rs246313752,,,,0,,,,1,0,0,,,
S3T023417413,2,85435333,-,ATGAAGCTTTTTTGAAACTTTTGCACATTTTGACATAAGCATAAGTTTTG,,A,C,3,,,,,0,,,,1,0,0,,,
S3N023421264,2,85531605,-,TCAACTGCCACATAACTTGTCAAACTGTTCACTCCACTCCAATTCCTCTC,,C,T,1,rs28012088,,,,0,,,,1,0,0,,,
S6Y023436902,2,85922554,-,GCCTCTCTACACACTCTTGAACCCAAGATGCCTTCCAAACTCTTCCCTCA,,A,G,1,rs28060714,,,,0,,,,1,0,0,,,
SBJ023442990,2,86074755,+,ATTTTTCTTTGCAGAAAACAGACACTATATTAAGGCAATGCCAAATTTTA,,C,T,1,rs579239212,BALB/cJ,substrain,BALB/cJ,0,T,,,1,0,0,,,
gUNC3467697,2,86100773,+,TCCATCTCTCTATTCCCCAATTCTTACATATGCTGTTGTCATATTTATGA,,T,C,1,rs108203228,,,,0,,,,1,0,0,,,
gJAX00096872,2,86841406,+,CTCTCTGCAGGGAAGCTCTTCTCAGGCGGGGAAGGTACACAGATGTGGGA,,T,C,1,rs33190840,,,,0,,,,1,0,0,,,
S2H023483060,2,87076516,-,AACATGTCTCAAGAGCTAGCATTATATATATTAGACAATGTTGACAAAAA,,A,G,2,,DBA/2JOlaHsd,substrain,DBA/2JOlaHsd,0,G,,,1,0,0,,,
gUNC3482843,2,87523982,-,TGACAGATACCAGGCCATCAGTAACCCCTTGCTCTACACAGTGAACATGT,,G,A,1,rs33589730,,,,0,,,,1,0,0,,,
S1H023506874,2,87671860,+,GCAGGATAGGAGGGATGTCACAGAAAAAATGATTGATCTCATTAGATCCA,,C,T,1,rs33202672,,,,0,,,,1,0,0,,,
B10020087700,2,87700499,-,GATAGTAAATATCCCCTGTCCATTTGTTTCTTATTGGCCTCTAAATTGGA,,T,C,1,,,,,0,,,,1,0,0,,,
mUNC3484677,2,87781524,-,AGTGAAATTAAGTCAATTTTTAGGAACCATGATCTGAGTATATTTCAGCA,,C,A,1,rs108642145,,,,0,,,,1,0,0,,,
S6Y023518801,2,87970036,-,ATTGCCCCAGTCAATGAAGAGACACTAAGAAGAAAGGAAATTTAGTGTAC,,C,T,1,rs51046601,,,,0,,,,1,0,0,,,
gUNC3489675,2,88285256,+,ATTAATCCTTCCACTCTATGAGCCTGGGAGATCATTCCATCTTTTGAGAT,,T,C,3,rs227905637,,,,0,,,,1,0,0,,,
gUNC3495996,2,88912576,+,GCTTGCTAGACATGATTATCTGAGTTCAAATCTCTGCCCTGTGAAAAACT,,C,A,1,rs45934743,,,,0,,,,1,0,0,,,
SSR023559106,2,88977668,+,TTGGTACACACATGTGTGTCCCACTCACTCACAAATAAAATAGAAATAAG,,C,T,1,rs27399430,,,,0,,,,1,0,0,,,
S3R023586618,2,89665472,-,AACTAAAACTAACTAAAGGGCAAGAGATAACAGTCAAATTAACAAACTCA,,C,T,2,,C3H/HeNRj,substrain,C3H/HeNRj,0,T,,,1,0,0,,,
gUNC3501939,2,89845055,+,ATGTCCTGGAAATAAATGACATGCTCACATATTTAAACTCTGGCTGCCTC,,T,C,1,rs13476630,,,,0,,,,1,0,0,,,
mUNC020442578,2,90479350,-,TCTGACAGATCTGTTTATTTTCCCATTGAGGAAGGTCCTAACACACAGGG,,C,T,1,rs264373103,,,,0,,,,1,0,0,,,
gUNC3510621,2,91123029,-,CGGCTCCTTTGTTGGGAGCTAGCTGGTGCCTTGTGCTTTCCCTTGTGTGG,,T,C,1,rs29726948,,,,0,,,,1,0,0,,,
SSH023646944,2,91173608,+,TGAACCCAGGCCCCCTCAAGAGCAGTGTGTACTCTTAACTGCTGAGACAT,,T,C,1,rs32908191,,,,0,,,,1,0,0,,,
SFJ023650735,2,91268380,+,AGGTTTCTCTTTAGTCCTTGGAGGAAGGGGTGGGCATACATCTTTTGATG,,G,T,1,rs387251542,FVB/NJ,substrain,FVB/NJ,0,T,,,1,0,0,,,
gUNCHS005753,2,91748798,-,ATAACTAAAGAAGTTATACATGCACTATATGCAGTGGTGCATGAGAAAAA,,T,C,1,rs233753892,,,,0,,,,1,0,0,,,
gJAX00097245,2,92020480,+,CTGACCTGAACCTCGTTCATTCATTTACGCATCTGTCAATGGTTGACCTA,,C,T,1,rs27368358,,,,0,,,,1,0,0,,,
S1L023691303,2,92282583,-,AGTAGTATGACAGCCCTTACAAGATGGGGCCCCTTGATCTTGTACTGTCC,,C,T,2,,,,,0,,,,1,0,0,,,
gJAX00097292,2,92657644,+,CTCACGCCAAGCACTCTTAACGGGCTTTCCTTTACTAGCACTGTGTTCTA,,C,T,1,rs28283290,,,,0,,,,1,0,0,,,
mUNC3536464,2,93447473,+,ATTACACACAGGGCTTGCTAAAACCCCAGCATAAGGCTCAGAGGTGAAAG,,G,A,1,rs29884212,,,,0,,,,1,0,0,,,
gUNC3545364,2,94086081,+,CTCATGACAACACCCAGTGGAAGAAAATGGACATTTCTGTGTTAAATCCC,,C,T,1,rs27393894,,,,0,,,,1,0,0,,,
SNJ023788924,2,94723120,-,TCAGTTCTGTGTGATTTATTCATGGAGTGTGGCACAGAGCAAATCATGAC,,C,T,1,rs243851793,NOD/ShiLtJ,substrain,NOD/ShiLtJ,1,T,,,1,0,0,,Consensus,Not Fixed
mJAX00496926,2,94738625,+,GAAGTCACTGAGAGATGGGCTTGTGGAACTTTATGGTGTGAATTGAAAAT,,G,T,1,rs27413623,,,,0,,,,1,0,0,,,
gUNC3559086,2,95316176,+,GGAAGGGTTCTGACCAACCAATCTCCTAGACATATGCCAGGCATGTGTTA,,C,T,1,rs32881544,,,,0,,,,1,0,0,,,
B10020095771,2,95771500,-,AGCAAAAATCTGTTCAGTGGCCCATGGGAGGTATCGCTACACTTTCACGG,,A,C,1,,C57BL/10,strain group,"C57BL/10ScCr, C57BL/10ScNHsd",0,C,,,1,0,0,,,
gICR5123,2,95957971,-,TGCTCATGTCTATGGTTCCAGATTTCTTTCCTAGGATTTCTATCTCCAGC,,T,C,4,rs248253985,,,,0,,,,1,0,0,,,
gUNC3568598,2,96218147,-,GGAGTTTACCAGAGGGTCTTATGGTCTTGTTAAAGGAGTATTTTCAGGAG,,G,A,1,rs29572807,,,,0,,,,1,0,0,,,
D3C023867101,2,96677536,+,CCAGAGACACAATACCTGTCCAGTCTCTTGGAACAACAACAACATAAAAA,CCAGAGACACAATACCTGTCCAGTCTCTTGGAACAACAACAACATAAAAT,A,T,1,,C3H/HeNCrl,substrain,C3H/HeNCrl,0,T,,,1,0,0,SPIKE,,
gUNC3576998,2,96880494,-,AATTCAGTCCATTAACATTTGATCATGTAATCTTGTGAAATGGAGTTTTG,,A,G,1,rs27382031,,,,0,,,,1,0,0,,,
S2C023879774,2,96994354,+,GAAACAAGATCCTGGCTGATTTGAATTTCATCTGCTCCTGCAGCTCATCC,,C,T,1,,DBA/2NCrl,substrain,DBA/2NCrl,0,T,,,1,0,0,,,
gJAX00097622q,2,97097345,+,GACCAAGTTGTCAAGAAGGAAAAAGAGGGGAAGCCGCAAACATTACTCCT,,C,A,1,rs27364048,BALB/c,strain group,"BALB/cByJ, BALB/cByJRj",0,A,,,1,0,0,,,
S3N023889998,2,97249953,+,ATCTTACTGTATTATTTGACTATCTTCAGTTTGGGGTTACTGGATTATAC,,G,A,1,rs27395515,,,,0,,,,1,0,0,,,
gUNCHS005897,2,97294755,+,CTGTAGGCTACCACTTTGCCCTATTGATTGTGCTGTTTTGCACTGTGGAA,,G,A,1,rs237739594,,,,0,,,,1,0,0,,,
S3T023896250,2,97406262,+,GTCTTCCTCATGAGTGAAGGCATCCCTAACCTTCTCTGTACCCCACTCCT,,T,C,1,,C3H/HeNTac,substrain,C3H/HeNTac,0,C,,,1,0,0,,,
gICR5142,2,97963984,+,ATGGATTTCTAATAGGTCAGTATACATTATTCCATCAAATATTTATGGAT,,A,G,1,rs29573592,,,,0,,,,1,0,0,,,
gUNC3602909,2,98762810,+,ATGAGATAAGAATGGATAGATTTGCATTCTTCTACATGTTCACGATACTT,,G,A,1,rs51501702,,,,0,,,,1,0,0,,,
S3C023958069,2,98951727,-,AGTCAAGAAATTACATGGTTGTTTAGTCAGTTTCTTGTACTCAATAACTT,,A,G,1,rs33658686,,,,0,,,,1,0,0,,,
mJAX00497574,2,99562534,-,TAAGAGATCAGAGAGAGACAACTGCCCAGAAGCTGGGAACATTTGGTTTG,,G,A,1,rs27409433,,,,0,,,,1,0,0,,,
B10020099785,2,99785200,-,TCATGTCACACCCAAATATGCAACTGATCATTGAGGAACAGAAGTCAGGA,,G,A,1,,C57BL/10,strain group,"C57BL/10ScCr, C57BL/10ScNHsd",0,A,,,1,0,0,,,
gUNC3623501,2,100025500,+,AAGAAAAGTTCAACAGCCTTAGTAATCTGGGAAATGCAAGTCAAAATGGC,,T,C,1,rs214178208,,,,0,,,,1,0,0,,,
mJAX00497664,2,100277691,-,GTAGAAGGTTATAGATAAGAGGAATGAAATTAGGGAGAATGGGAAAGGCT,,T,C,1,rs27359182,,,,0,,,,1,0,0,,,
gUNC3633403,2,101010866,+,ATGAGGATGCAGTGGCATGCCTTCTTATGGGAGGCCATACGAAAGTTATA,,C,A,1,rs32343330,,,,0,,,,1,0,0,,,
SS1024055012,2,101375306,-,TTATGCATCAGACATCAGTATGAACATTTCACATGTAATACATAATTAGT,,G,A,1,rs33272361,129S1/SvImJ,substrain,129S1/SvImJ,0,A,,,1,0,0,,CC,CC
S1J024073519,2,101837983,+,TGCATTTTATTTGCATTCAAAATCAGTACTGTATACTGGAGAATGACCAG,,C,A,1,,DBA/1J,substrain,DBA/1J,0,A,,,1,0,0,,,
gUNC3645479,2,101844739,+,GGAGCAATTATGGACTAAAATGTTATGTTTGGTGGAAAACTCTAACCCAC,,C,A,1,rs46200920,,,,0,,,,1,0,0,,,
gUNC3652253,2,102235658,-,TAAATCCAGTGGGGTTCCTGGAATGATATGGCCTTCTCTTGTTTTGATGC,,T,C,1,rs27359554,,,,0,,,,1,0,0,,,
gJAX00498115,2,102676534,-,TTGGTCCTGCAAGGCTCCCTGAAATGGAGCCATGAACTGTGGGATACAGA,,C,T,1,rs27376191,,,,0,,,,1,0,0,,,
gUNC3659049,2,102681473,+,GTGTAACATGCATCACTCAGGTGGCAATAAAATGTGGCACCCGCTATTCA,,C,T,1,rs27376152,,,,0,,,,1,0,0,,,
gUNC3668511,2,103449108,-,CCGCTATTTTATATAACTTGTCTTTGCAGGTTCACTGCGTCCGTTGCTGC,,G,A,1,rs27356479,,,,0,,,,1,0,0,,,
gUNCHS006044,2,103871607,-,GAGCCATCTGCCTGCTGATGGAGGCTGTTCATTTTCTGAGATGTTGTGTG,,A,G,1,rs27362797,,,,0,,,,1,0,0,,,
S6R024168545,2,104213628,+,ACTAATGCCAACCAAAGAACTCTGGTTGTTTTTCCTTCCTTTTCTCTTTT,,C,T,1,rs3723807,,,,0,,,,1,0,0,,,
mbackupJAX00098146,2,104470657,-,TTTCTGCTAAGTGAAGTTTGATAAGTGCATGTGATGAGAGAGACTGCTTC,,A,G,1,rs33188602,,,,0,,,,1,0,0,,,
S6H024187373,2,104684345,+,GAGACCAAGGGATGCAACCCTGGCCCTGTCGTGACAAGGATGACAGCGTG,,T,C,1,rs27414611,,,,0,,,,1,0,0,,,
gUNC3690962,2,105278676,-,GTTAGTTCATATTGTTGTTTCTCTTATAGGGCTGCAGACCCCTTCAGCTC,,A,G,3,rs233560218,,,,0,,,,1,0,0,,,
SFH024233590,2,105839754,-,AAACAGAAGTCTGGTTTTAGCTACAATAATAGAAAACTCTGATACTGTCC,,C,T,1,,FVB/NHsd,substrain,FVB/NHsd,0,T,,,1,0,0,,,
S2R024234290,2,105857253,+,TGGCGTTGGACAAAGCGAAATTCTAAAAAAAATACTATTTAGAAAACCTA,,C,A,1,rs32930387,,,,0,,,,1,0,0,,,
gUNC3699228,2,106097841,+,CAGGTCACGACATAGACAGGGAACTACTAATACTAAATGTGCTTTGATGT,,T,G,1,rs47499535,,,,0,,,,1,0,0,,,
S3C024269479,2,106736986,+,CTTGTGACAAAGTCTTTTAAGAATGAAGGCCACTGCTGGGCGTAGTGGCG,,A,C,1,rs218980259,,,,0,,,,1,0,0,,,
gUNC3707804,2,106772773,-,GCAGAGCAGAAGGCTGACAGTAGAAATGCAGTCTCTGCCTTAACAGCACC,,T,C,1,rs28334379,,,,0,,,,1,0,0,,,
gUNC3712628,2,107153805,-,AAACACCTGACCATAGACCTCGAGCAATTCAACTGCCCATGTGCTACCAC,,C,T,1,rs27472920,,,,0,,,,1,0,0,,,
SBJ024287387,2,107184686,+,TCCATAAGGTCTGCTTTCTAGAAGGTGTGACAAGAGTATCTGTAACTATT,,C,T,1,rs253109829,BALB/cJ,substrain,BALB/cJ,0,T,,,1,0,0,,,
gUNC3715557,2,107411736,+,CATCTTCCCTTCAATATTCTTCCTACTTCTGCGAAGGGATGGTTTAGGAG,,A,G,1,rs237452465,,,,0,,,,1,0,0,,,
S6H024329108,2,108227709,-,CTTTCAGATAAATAGTAGCATTATTTATTAAGATTTTATCAAACAACCTC,,T,C,1,rs51895584,,,,0,,,,1,0,0,,,
mUNC3726307,2,108339657,-,TGTTATTGTATTGTTGTGGTCTTTATGTCTATTTATTTCAAATTTGAGGT,,G,A,1,rs33655656,,,,0,,,,1,0,0,,,
SBJ024343076,2,108576908,-,CGTCATTGTGCTGTTTTTGATACTGCTAAGAATGACTCCAGGGCTTCGGT,,C,T,1,rs221101794,BALB/cJ,substrain,BALB/cJ,0,T,,,1,0,0,,,
gUNC3732390,2,108891302,-,TATCAGATTTTCTGCATATCAGATATTTACATTACAATTCATGACAGCAG,,T,G,4,rs232348700,,,,0,,,,1,0,0,,,
gbackupUNC020481320,2,109214703,+,AAAGAGATCGAAAGCCAAAGTATCTACTTTGGTGAGGTAGAATATCATAA,,C,T,1,rs33079684,,,,0,,,,1,0,0,,,
DX1024130647,2,109813167,+,GATAAACTCTTCACCTGCCGTATTTAAACGTTCCCAGTCCTGTGATCATG,,C,A,1,,129X1/SvJ,substrain,129X1/SvJ,0,A,,,1,0,0,SPIKE,,
gUNCHS006189,2,109895549,+,TCAGTACTTCAGAAATAGTAGTTGGTATTGGGTCTTTTCCCTCCCTTCTC,,C,A,1,rs215778096,,,,0,,,,1,0,0,,,
SAJ024403233,2,110080837,-,AAGGAAAACACACGTCAAATGATGCTCTTTCCTCAGCCAACTGAAACCAA,,G,A,1,rs252019511,A/J,substrain,A/J,0,A,,,1,0,0,,CC,Consensus
DBR024408554,2,110213870,+,TTTGATTGGTTTTAGAAGATCTAACAGAGATGGCCTTAGGTGACCCTTGT,,G,A,2,,BALB/cByJRj,substrain,BALB/cByJRj,0,A,,,1,0,0,SPIKE,,
SFJ024415088,2,110377213,+,ACAGAGGCAAACACATGCAGTTCCAGAGGCCAAAGCCACATGTGATGTAA,,G,A,1,rs27493015,FVB/NJ,substrain,FVB/NJ,0,A,,,1,0,0,,,
gUNC3751339,2,110858214,-,AGCTTCCAAGCAGGCAAGTTGCAGGAGCAGATGAGAGTCTTCATTTTGAT,,G,A,1,rs50428137,,,,0,,,,1,0,0,,,
gJAX00499705,2,111114826,-,GGATTCCTTCAGCATAGATGCATGAGAAAAGAAATGATAGTCTGAACACA,,A,G,1,rs27504592,,,,0,,,,1,0,0,,,
mUNC020137208,2,111752248,+,TTTTCTTAAAAGTGTTCAGCTTAACAATAAAATCCTTGCATAAGACAGTA,,C,A,1,rs29731990,,,,0,,,,1,0,0,,,
S3C024483072,2,112076803,+,CTTCTTTAAACATAAGCAAGACCAAGGTCTCTCTTGTTAATTCCAAAACA,,A,C,1,rs259454643,,,,0,,,,1,0,0,,,
gJAX00098744,2,112457989,+,TGATATAAAGAAACATCAGATTATGCAGTACCCTGGAGCTTACAGCCTCA,,G,A,1,rs27506268,,,,0,,,,1,0,0,,,
gJAX00499986,2,113260069,+,TGAAGGACTAAGAGTTAGACAGATGGCTGGAAGACATATGGATAGGAAAA,,T,G,1,rs27488294,,,,0,,,,1,0,0,,,
SBR024549672,2,113741804,-,CACTGTAATCCAGTTGCAAACCATTAAGGTGAGGAAAAGAAAGGTTTGAA,,A,G,1,rs27491186,,,,0,,,,1,0,0,,,
S3C024550659,2,113766485,-,AAGCTCTCCTAGAGGGCTGTGATCCAGAACCACAATGCTTAGCTATCCAG,,A,C,1,rs263200710,,,,0,,,,1,0,0,,,
ST2024553732,2,113843324,+,CCCCGACTTCCTAAAAAGCCCTTCTGTATGAATATGCTCTTTTAAAGATG,,C,T,1,rs27469904,,,,0,,,,1,0,0,,,
S2C024559052,2,113976314,-,TGTCAAACATGGGTCAATTTTCACACAGGGCATTTCTATTGGTGAAAAGT,,G,T,1,,DBA/2NCrl,substrain,DBA/2NCrl,0,T,,,1,0,0,,,
S2H024573205,2,114330149,-,AGAACTGTCAGATCAAAGAAAGCAGTTCTCAAAGAGCTTGAATGTGTTTG,,G,A,1,rs27455044,,,,0,,,,1,0,0,,,
SAC024574328,2,114358217,-,ATACAGGAAGGCGCTGTTAAGAAGTAAATGAGTACTCTTAACAAGGTTTT,,G,T,1,rs51517980,A,strain group,"A/J, A/JCr",0,T,,,1,0,0,,,
gUNC3786561,2,114530383,+,TGGAAGCCTCACACTTACGTTAGAGGAAGGTCAAGGTACTCCTTCATTGT,,C,T,1,rs27427480,,,,0,,,,1,0,0,,,
B10020114842,2,114842347,+,TCCCTCCAGTGGTATATTCTGAGCCTCTTAAAGTAGCCATGTGCGATGGA,,C,T,1,,C57BL/10,strain group,"C57BL/10ScCr, C57BL/10ScNHsd",0,T,,,1,0,0,,,
S6H024601566,2,115039159,+,CATTGTCATCCATATATGGTAAATGGAGATGTTGTTCTGCTATCCCAGTC,,T,C,1,rs46924780,,,,0,,,,1,0,0,,,
gUNC3792842,2,115123416,-,GTTACAGAGTCACATGCACAAAATAGTATCACATGGCAGTATCTTGGGAA,,C,T,1,rs27442151,,,,0,,,,1,0,0,,,
S6J024630823,2,115770589,-,AACGCTCTCTCTACTGCTTCTTTTGCTTGTATGTTGAAGCCAATGGCTAT,,C,A,1,,C57BL/6J,substrain,C57BL/6J,0,A,,,1,0,0,,E3,Consensus
gUNC3799927,2,115782771,-,TGATGACACCCCAAATAGTACCAGTTATAGGGAGTCTGACAACACCCCAA,,T,G,1,rs27442433,,,,0,,,,1,0,0,,,
S2H024645115,2,116127887,+,TGAGGTCTCTTTCTCCTTTCAAACCCTCTTTCCAATTCACAGCAATGGCT,,G,A,2,,DBA/2JOlaHsd,substrain,DBA/2JOlaHsd,0,A,,,1,0,0,,,
gUNC3805990,2,116330674,-,GAAACACTCCATTCTACAGGGAAGCTTACTAAGGCAGGAAGTTAACAGCT,,A,G,1,rs33731514,,,,0,,,,1,0,0,,,
DS6024656881,2,116422030,+,GATGTTGAAGCAAGATAAGAGAGTGGAATCAAGACAACTCCCAGGATATT,,T,C,1,,129S6/SvEvTac,substrain,129S6/SvEvTac,0,C,,,1,0,0,SPIKE,,
S1L024667345,2,116683648,-,GTGAGTGCATCAAATAGGGAGCATTGGGAATGACTTGTAAGCTAGAGGTA,,G,A,1,rs27469311,,,,0,,,,1,0,0,,,
SFC024672583,2,116814577,+,TACATATTTAGCATGTCTCGGGACATTTTGTCCTTGTTTTACCCTCAAGG,,C,A,1,,FVB/NCrl,substrain,FVB/NCrl,0,A,,,1,0,0,,,
gUNCHS006346,2,116817718,-,AGATGAATTCTCTGTAAACAGTAGCTAGCATTTCATCATTACAGAGAGGA,,G,A,1,rs47827976,,,,0,,,,1,0,0,,,
SBT024676952,2,116923821,+,CCTATACTCATTATGTCTGTTTTCATGGGCAGGCTTAGTGGAGACTTCTT,,C,T,1,rs221250254,BALB/c,strain group,"BALB/cJ, BALB/cJBomTac",0,T,,,1,0,0,,,
S2C024686748,2,117168706,+,GTGCACGTGCGGAATCTACTTTATTTCTAATCATAAAAAGCACCTGAGGA,,G,T,1,,DBA/2NCrl,substrain,DBA/2NCrl,0,T,,,1,0,0,,,
S2J024690011,2,117250291,-,TGGTAACGACGTTCTGAAAACTGTCGTTTCTCCCTGCCTACCACACAAAC,,C,T,1,rs29969265,DBA/2J,substrain,DBA/2J,0,T,,,1,0,0,,E2,Consensus
gUNC3820213,2,117536947,+,GACTCCTATGGTTAGGACTGAGAAGGGGTGACCGAAATAATTTGATTACA,,T,G,1,rs256137775,,,,0,,,,1,0,0,,,
gUNCHS006372,2,117983237,-,GCTAGTGCGAGCTTTCAGCCAATGCCTGTGAGGACTGCTGTTTGCTTTTT,,C,A,1,rs3144257,,,,0,,,,1,0,0,,,
S6R024742128,2,118553201,+,CCTAGACCAAGGGAAAGAAGTTGGCTTCATCTTCCCAAGGACTAGAAAGT,,T,C,1,rs3144163,,,,0,,,,1,0,0,,,
gUNC3835514,2,118776941,-,TTAAATTTTTAGCCAGGTATGTTGGTACATGCTTTTTAATTCTAGCAACA,,G,A,1,rs3144345,,,,0,,,,1,0,0,,,
gUNC3839051,2,119148011,-,TGTTCCCTAGACTCCCTCTACCGCCATTGAGGTTTGATTGTAAACTTGGC,,G,A,1,rs27453644,,,,0,,,,1,0,0,,,
gUNC3842618,2,119534204,-,GCCTTGTTGGAGGGGTGTGTTCCCTTTAGACTTCCAGGTTTCAAAAGCCC,,T,C,1,rs29868055,,,,0,,,,1,0,0,,,
B10020119823,2,119823241,+,TCCCATTTAGTTGAAGGTCCCAGAGATGGTAATCTTGTTTTTGAACTCAA,,C,T,1,,C57BL/10,strain group,"C57BL/10ScSnJ, C57BL/10SnJ",0,T,,,1,0,0,,,
gUNC3848356,2,120172616,-,CAGAAAATCTAACTCAAGGCTCATTTCTTCTACGAACTCCACACTGCAGC,,A,G,1,rs46225522,,,,0,,,,1,0,0,,,
S2R024811869,2,120296741,-,TTCAGTTGGGATGCCCCTTCTCTGGGAGTGCCACCTGCCTTAACTTTGGA,,C,T,1,rs247086722,,,,0,,,,1,0,0,,,
gUNC3855439,2,120891344,+,GAGAAAATGTCCCCATTAGATTGACCTGTAGGTGGTTCCACTCCTGGGCA,,A,G,1,rs49511079,,,,0,,,,1,0,0,,,
SNT024838550,2,120963767,+,AGAATTTTGTATGTGCACGACATGGTTGATCATATTATCCACTTCCCCTC,,C,A,1,,NOD/MrkTac,substrain,NOD/MrkTac,0,A,,,1,0,0,,,
gJAX00501563,2,121366142,+,AAGCTTTATATGCACCTGACCCCGTGATGTATCTGCTAAAGTGAAGATGC,,C,T,1,rs27439763,,,,0,,,,1,0,0,,,
S2J024884784,2,122119605,-,TGCACAGGTCTCTGCTATTTCCAGGCTTACATAGAGTTTGGTCAGGAATT,,C,T,3,rs218203126,,,,0,,,,1,0,0,,,
gJAX00501685,2,122232617,-,TCTGTCTAGTGTTAATGTTACGTAGGCAGCAGTGCAGCTGGTATTGGAAC,,C,T,1,rs27471201,,,,0,,,,1,0,0,,,
SFT024891637,2,122290938,+,GTCCAGGCTGTGGTCAGAGAGTGACCTCAGGGGGTCATGTAAGTCAAAAA,,G,T,1,rs239620216,,,,0,,,,1,0,0,,,
S6H024911240,2,122781014,-,CTTTATAATAAACCAGTAAGTGCCAGCTAAGTGGCTTCCTGAATTCTCTG,,T,C,1,rs50730358,,,,0,,,,1,0,0,,,
gUNC3876294,2,122916805,+,TCATGTGGGTCATGTTTTTTTTTAATGCTCTTGAAGTTTAAAAAAGATGG,,A,G,1,rs27437788,,,,0,,,,1,0,0,,,
gUNC3877462,2,123024107,-,AGATGCCTTCCTGATTAGCCAGGCCCACTCATTTTCTCACATCCTCCCAC,,C,T,1,rs29576727,,,,0,,,,1,0,0,,,
SBR024956708,2,123917704,+,AATATTGTCTACTCATGAAAAGATTTTAGGTTAAGTTTCCAGAACCCACT,,T,G,1,,BALB/c,strain group,"BALB/cByJ, BALB/cByJRj",0,G,,,1,0,0,,,
gUNCHS006551,2,124023156,-,ACCTGGCCTCTTGAGATGAGACATCAGATCTTGCTTTCTTTAGATACCCC,,C,T,1,rs29577141,,,,0,,,,1,0,0,,,
S3R024965775,2,124144381,+,GTGTGCAAGGAAGAGGGAGCCATAGGGCATATGCATATGTATGCAGACTT,,T,C,1,,C3H/He,strain group,"C3H/HeNRj, C3H/HeNTac",0,C,,,1,0,0,,,
SFT024968011,2,124200275,-,GAAGTCAGGAAGGGGCATTTTCTGATCAGAACAGGACAGAGGTTCTTTTA,,G,T,1,rs244330048,,,,0,,,,1,0,0,,,
mUNC020185566,2,124227533,-,AGAAAATATCAATAATATTAATAGATACTAGTCCCTGGTGAGATTATTCC,,C,T,1,rs33192058,,,,0,,,,1,0,0,,,
B10020124559,2,124559585,+,TTGAATTCCAAAGTCAAGGGACTTAAGGCAAGATATCTGCATTTTTCCAT,,C,T,1,,C57BL/10,strain group,"C57BL/10ScCr, C57BL/10ScNHsd",0,T,,,1,0,0,,,
S3R024989699,2,124742490,-,AGTGCTCTCTTGAACTTGGAAGATGACAGATCTCTGTGTGGAAAACATCC,,G,A,1,,C3H/He,strain group,"C3H/HeNRj, C3H/HeNTac",0,A,,,1,0,0,,,
S3H024991658,2,124791473,-,GCTCAGAAAAAGATTTCCAATTATTTGCAAGCAGATAACATTGTATAGTG,,A,G,3,,,,,0,,,,1,0,0,,,
gUNC3906007,2,125301952,-,TTAACCCATTTCCATGTGTCTTTCTAGGACGGGTCTGAGATGGAAGCCAA,,G,A,1,rs29766215,,,,0,,,,1,0,0,,,
gUNC3909838,2,125549513,+,TAGCCACAGACTTGGAATTTCTCATGAAGTTTCATTCAAAAGAAAACAAT,,T,G,1,rs248269264,,,,0,,,,1,0,0,,,
S3C025030184,2,125754606,-,GTGACTGCATGGAAAGACAGTGTTTAACTGGACTTTGAAGAATGAGTTGG,,C,T,1,rs50648971,,,,0,,,,1,0,0,,,
S3C025039182,2,125979557,-,TGCCTTGCATTTCAAATTAAAGAAGCATTTATGTTTTATACAAATAGAGC,,C,T,1,rs48546162,,,,0,,,,1,0,0,,,
gUNC3915705,2,126172797,-,ATTTATTTCTTCTTATGCTTAAGAAGCAGTTTCTTAAGAATTTAAAAGGC,,A,G,1,rs32920288,,,,0,,,,1,0,0,,,
S3N025049252,2,126231303,+,TGAAACTGTTAAAAGTACTATCCTTGTCTTGTTTTTATTGTCAAAGTGAA,,G,T,1,rs6256722,,,,0,,,,1,0,0,,,
gUNC3923424,2,126931449,+,AATAGCAACCACAGTGTGGACTTAACACTTTGTATGTTCTGTTTGGTTTG,,G,T,1,rs50763225,,,,0,,,,1,0,0,,,
gUNC020187887,2,127359499,+,TGTTAGGTCTGAGTCAGCTGTAAGAGATCACATGGGTGGGTCAATAAAGG,,G,A,1,rs46377745,,,,0,,,,1,0,0,,,
S6T025109239,2,127730977,+,CCAGCAAGCTTCCAGACAGCCTGTCCTCAACCTTTTCCAAGTCCTAGAGC,,G,A,1,rs28283899,,,,0,,,,1,0,0,,,
SAH025109672,2,127741807,+,TCTGGGATCTAGAGAAAGGAGGCCCAAGCAGGGGAGTGAAGGCCCATCGG,,T,C,3,rs33196398,,,,0,,,,1,0,0,,,
S3C025128173,2,128204331,+,GGAAGATGATTGTTCTTAGTCATCCAATTTCTCTTCTACGATGTCGAAAA,,C,T,1,rs27431869,,,,0,,,,1,0,0,,,
gUNC3939722,2,128254933,-,GTTCCACCCCGACTTCTGTCAGTGATAGACTATGTCCTAGAAGTGTAAGC,,T,G,1,rs33708113,,,,0,,,,1,0,0,,,
gUNC3943815,2,128570000,+,ATAATGGACTAAATCTCTGAACCTGTAAGTCAGCCCCAGTTAAATGCTGT,,T,C,3,rs250655918,,,,0,,,,1,0,0,,,
UNC3945744,2,128728595,+,AGGCGTGCACCACCACACCAGACAGAATTTTCTTAGGTATCCTTTAGCCC,,T,C,1,rs50161452,,,,0,,,,1,0,0,,,
S1J025150046,2,128751171,-,TGGAAAAGGAAGGAAGTTATACACTTCCTCCAGGAGTCACTTTTAGTTTG,,A,G,1,rs107916574,,,,0,,,,1,0,0,,,
B10020129031,2,129031070,+,GACCAGTGACCACTCTAGGGCAGTAAATCATTAAACATATACACATGACT,,C,T,1,,C57BL/10,strain group,"C57BL/10ScSnJ, C57BL/10SnJ",0,T,,,1,0,0,,,
SAC025180277,2,129506932,-,CTTATGAACGTATCACATGTACTTTAGAAAGACGTCTGATCTCCATTTAG,,G,A,1,,A/JCr,substrain,A/JCr,0,A,,,1,0,0,,,
gUNC3955258,2,129520040,+,GGGATGTAAAAACTCCAAGAGGCTTCACCAATGGAACTGGTGTTTCCCAG,,A,G,1,rs27414370,,,,0,,,,1,0,0,,,
SBC025193785,2,129844641,-,AGAAAGAGATATCTATCCAGGCACAAGAAGCCTACAGAACATCAACTAGA,,T,G,3,rs46909946,,,,0,,,,1,0,0,,,
gUNCHS006738,2,129848173,-,CTTCTGAGCCATTTCCAGCCCCTAGATTACATATACAGTCAAGTTTAGAA,,G,A,1,rs29502246,,,,0,,,,1,0,0,,,
S6H025199949,2,129998725,+,GGCGTTCCCAGATGGGAGAGCCAGATGGCCCCACAGAGAGAGTGTTTATT,,C,T,2,,C57BL/6JOlaHsd,substrain,C57BL/6JOlaHsd,0,T,,,1,0,0,,,
gUNC3964649,2,130232575,+,TCTGACTCCTCTGTGTGTACTTTCCTGAGATATACTTCAAGAAGAAGCAA,,G,A,1,rs252662152,,,,0,,,,1,0,0,,,
mbackupJAX00503740,2,131189555,+,GAGAACTGGCTCCCTATTTAGAGAAGGGCCAGATATTGTATTAGCTATCA,,T,C,1,rs27243761,,,,0,,,,1,0,0,,,
mUNC3976996,2,131435364,+,ACTCAAAATGGAAGTCTTATGTTGGGGTCTATCCTGGGGCAGCTTTATAG,,T,G,1,rs47910544,,,,0,,,,1,0,0,,,
SBH025277513,2,131937848,-,AGACAGAAATGAAGAAACTCAAGTTTCTAGCCTTTGTACCTTAACCATCC,,G,A,1,,BALB/cAnNHsd,substrain,BALB/cAnNHsd,0,A,,,1,0,0,,,
gUNC3987593,2,132236224,-,TAGACCGTCATCATTCAGGAAGTGAAACTGCTGCTGGAAAAGTGAAGGTC,,C,T,1,rs245016778,,,,0,,,,1,0,0,,,
S3C025296197,2,132404927,+,CCAAACCATTGAGTTCGTTTTGCGATGGGCATCTACTGTTGGGCCTGGGG,,C,T,1,rs242030509,,,,0,,,,1,0,0,,,
gUNC3995273,2,132719770,-,AGCCCCCTTGCTGACCTGACCACTTGCCTAGGAGGTTTACACAGTCAAGG,,T,C,1,rs226340656,,,,0,,,,1,0,0,,,
gUNC4003979,2,133344690,-,TGACTGAATAGGTTCAAAGATAGTGTGAACTTTATCCTCACGGAAATAAC,,A,C,1,rs28258400,,,,0,,,,1,0,0,,,
DP3025350614,2,133765372,+,TCCTTATGACAGGTAATAAGAATGGATCTGAGACAGCCTATGTGGCAGCT,,C,T,2,,129P3/J,substrain,129P3/J,0,T,,,1,0,0,SPIKE,,
B10020134208,2,134208226,+,GGACATGAAGGAATACGTGTTCAGTGAATGAGTGACATGCTAGATATTGA,,G,A,1,,C57BL/10,strain group,"C57BL/10ScCr, C57BL/10ScNHsd",0,A,,,1,0,0,,,
gUNC4015115,2,134214506,+,GGCTCTGCTTAGGTTCTGATGGTGTTTCTTTGTTTCTTTGGAAAACCTTT,,T,C,1,rs27256153,,,,0,,,,1,0,0,,,
DSB025393010,2,134825274,+,TTAGCTGCCCCTTTGAAGAAGGGAATGTGTAGTAAGAGTGGCTTTAAAGA,,G,A,3,,,,,0,,,,1,0,0,SPIKE,,
mUNC021772819,2,134997225,+,ATTTGTACTTGAAATCCTACAGCCGTTTTTACCTGAGCCTTACCTTCAGC,,T,G,3,rs236816747,,,,0,,,,1,0,0,,,
SBH025403504,2,135087600,-,TCAACTAAATATGGATCTCTGCTCCTGCATGACTTGGGTGTGGGAACATA,,C,T,1,,BALB/cAnNHsd,substrain,BALB/cAnNHsd,0,T,,,1,0,0,,,
DBT025410207,2,135255195,+,GAAGTGCTGTTTAAAATAGAATGGGTGCTGCCCTGAGAAGAAAAATCCAT,,T,C,2,,BALB/cJBomTac,substrain,BALB/cJBomTac,0,C,,,1,0,0,SPIKE,,
SBH025418062,2,135451569,+,AGGAAGCAGTTGACAAGGGTACTCTTTCCATTTAACCCTTCAGGCCCATG,,T,C,1,,BALB/cAnNHsd,substrain,BALB/cAnNHsd,0,C,,,1,0,0,,,
gUNC021476603,2,135566812,+,CAAGAGGAGAAGATGATGTCACTGTCATTCATTTCCTAGCAGACTGGCTC,,A,G,1,rs27254494,,,,0,,,,1,0,0,,,
gUNCHS006892,2,135880066,+,AAGATAGCTTAAAAATATTACTTGTTTTCCCATAAATCAGAGAGGTCACC,,C,T,1,rs29523263,,,,0,,,,1,0,0,,,
SFJ025444773,2,136119337,-,TGTCATGCCGTAGATCCTATAGAAGGAGGTCATCGTGGAGAAGTGGCTGA,,A,G,1,rs387620240,FVB/NJ,substrain,FVB/NJ,0,G,,,1,0,0,,,
S2J025467272,2,136681816,-,CCAGATCGTTCCCCATGAGAGCAGAAGAACCAAACAACTGACCCCCCCCC,,G,T,1,rs229777803,,,,0,,,,1,0,0,,,
gUNC4047364,2,136768182,+,ACAGGGGAAGATCCTGTGTCAAAATGCAAACATACCAACTAGGAAGGGAA,,A,G,1,rs27237582,,,,0,,,,1,0,0,,,
S2C025477834,2,136945874,-,ATTATAGCCTCCTGTTATTAAGGTTCTTTACAGAAATGAAAGCAGCAGGG,,A,G,1,,DBA/2,strain group,"DBA/2NCrl, DBA/2NTac",0,G,,,1,0,0,,,
gUNC4049749,2,136998544,+,GGTACATATTTCAGCTTAGATTAAAAAATTCTGTGACTCTGTGGAAGTTG,,T,C,1,rs27251983,,,,0,,,,1,0,0,,,
gUNC4055503,2,137615197,-,GAGGCTAACATGAGAACAAAATGCATCTGTATTCAGGTGCACATGTATGA,,C,T,1,rs27250730,A,strain group,"A/J, A/JCr",0,T,,,1,0,0,,,
SBB025512109,2,137802743,-,CTAATTTACATTGCTAAAATATGTGTCTCCTTTGAGGAGCTTATATTGTA,,T,C,1,,BALB/cByJ,substrain,BALB/cByJ,1,,,,1,0,0,,,
S2H025513596,2,137839918,-,TTCAGAATTTAATAATCCACCTAGTCAGGGAAGGAATGGCAATGGGAGTT,,C,A,2,,DBA/2JOlaHsd,substrain,DBA/2JOlaHsd,0,A,,,1,0,0,,,
mUNC021491922,2,137841021,-,TAATATCAAGAGGACATGGTATCAATATGACATCATTGATATGAATCTTT,,C,T,1,rs259290400,,,,0,,,,1,0,0,,,
S6J025539200,2,138480020,-,GTCTGTCCTCAATCTACAGTCAGGCCAAATTTTCTCATTTTCTTCATCTC,,T,C,1,rs13476801,C57BL/6J,substrain,C57BL/6J,0,T,,,1,0,0,,E2,E3
gUNC4075526,2,139118497,+,GACAGAACATTCCGAGGACACCTCAGTTTTGTCAGAATTTTAAACTTCAG,,T,C,1,rs28252222,,,,0,,,,1,0,0,,,
S3J025584622,2,139615565,-,GAAATTAGGAGGGGTGCTGTTTGCCTTAAAAATTCACCTAGTCTTTGAAA,,G,A,1,rs27202355,,,,0,,,,1,0,0,,,
gUNC4082030,2,139733224,+,GCAGCTTCCCTCCATCAGAGTTCTTTTGCATTTGAACAAGGAACTGATAA,,C,T,1,rs27220336,,,,0,,,,1,0,0,,,
ST2025591735,2,139793377,-,GGAAAGGGATATGGAGCTATAAGGAGGTGGAGGGAAATTCTCAGAGGCCT,,G,A,1,,129T2/SvEmsJ,substrain,129T2/SvEmsJ,0,A,,,1,0,0,,,
gUNC4088737,2,140256049,+,AGACTTTGTGAGAGTCTCAGACAAAGGCTGGTGTTCTAATAGGCTTCTTC,,T,C,1,rs27202681,,,,0,,,,1,0,0,,,
gUNC4094001,2,140668053,+,ACTTGATTTTAGGGTGGGAACGAGATTATGCATATGCAAAGCATGGAGAC,,A,G,1,rs27189907,,,,0,,,,1,0,0,,,
gUNCHS007013,2,141224276,+,TGCCAGAATGGAGCTCAGCCTACATCATTCAGGAGTAATTAGACTGTTGA,,G,A,1,rs27219934,,,,0,,,,1,0,0,,,
S3T025660355,2,141508876,+,AAAGGAGCCAACAAAACTACACTGAGCCAGACATGTGAATCTAGGAACTA,,C,T,1,,C3H/HeNTac,substrain,C3H/HeNTac,0,T,,,1,0,0,,,
S2H025660521,2,141513046,+,ACCATGTTTCTTCCCACAGTACCTCTAAGACCTTTGTTCTTTTAAATCAA,,G,A,1,rs27227136,,,,0,,,,1,0,0,,,
D6Y025660561,2,141514033,+,CTTTCTTCCCCATCATAGTAGTTTATGAGTCTCAGTTCAGATTTTACATA,,C,T,1,,B6N-Tyr<c-Brd>/BrdCrCrl,substrain,"B6N-Tyr<c-Brd>/BrdCrCrl, C57BL/6NCrl",0,T,,,1,0,0,SPIKE,,
S2R025661119,2,141527981,-,TTATGAAAAAATATGTGCTGTTGTTCCAGGTCCTAGCCTTCCACCATGAT,,G,T,1,rs32994184,,,,0,,,,1,0,0,,,
gUNCHS007020,2,141627707,+,CTTTTGTAACCTATTACCTGCTTCTTTTCTTTCATCCCCTTTTACTTAGC,,T,C,1,rs243364907,,,,0,,,,1,0,0,,,
S2H025673260,2,141831516,+,TATTCTCCTCCTTGGTACCTACAATGGAGCTAGATTCCTGTGAGAACTGT,,G,A,1,rs27200504,,,,0,,,,1,0,0,,,
gUNC4115263,2,142263048,+,AAGAAGAGGAGGAGGTTCCAGTGAACTGTCAGAAGAGATTGGTTCCAAAT,,C,T,1,rs27199531,,,,0,,,,1,0,0,,,
S2H025715658,2,142891450,+,CTCACACATGCCCTACTCCTTGTCTCTCTGACCCCTCATTTCCTCCTCCT,,T,C,1,rs229671413,,,,0,,,,1,0,0,,,
gUNC4128983,2,143324458,+,GGAAGGCAGTCTTCCACTAGCAGCTTTAAATGAAGATGTAGAACACTGAG,,T,C,1,rs32853689,,,,0,,,,1,0,0,,,
gUNC4133510,2,143659985,+,AGCCATTGTCACTAAGTATCTACCCTTCTATCACAGACCTGGGAATGAGA,,A,G,1,rs216463868,,,,0,,,,1,0,0,,,
B10020143838,2,143838655,+,CCCACTCACACTATCCTGGATGTTATAAGTTGTTGGGGTTGAGTTCAAGG,,C,T,1,,C57BL/10,strain group,"C57BL/10ScCr, C57BL/10ScNHsd",0,T,,,1,0,0,,,
gUNC4139799,2,144059556,+,ACAAGCTTTGAAAGGAGCCTTGTCTGTGCTGGACCGTTAGACGATGCTGT,,T,C,1,rs50494436,,,,0,,,,1,0,0,,,
S2H025777100,2,144427512,+,AAGGAGAGGATGCTCCAACTCCTGCATCCTTCAAGTCTCAGCCAAGCTAC,,C,T,1,rs27247539,,,,0,,,,1,0,0,,,
mJAX00506097,2,144750677,-,CTTGATGTCCTCTCTATTTGAGCATGAGCTTGGCCTCTGGCTTCTTCTCC,,T,C,1,rs27247988,,,,0,,,,1,0,0,,,
SFT025791257,2,144781428,-,ATGCTCACTTGGCTTGGCCTCTGTTGTGCACCAGGCTGATCCGCAGAGGA,,A,G,1,rs29960906,,,,0,,,,1,0,0,,,
SFT025791259,2,144781484,+,TGCGGATCAGCCTGGTGCACAACAGAGGCCAAGCCAAGTGAGCATTAGCT,,A,G,1,rs32934804,,,,0,,,,1,0,0,,,
ST2025812239,2,145305978,+,ATAATACCTAGAAGCATACCTAGCCCATAGTATATAGTCCATAAAGGATG,,G,A,1,rs228682065,,,,0,,,,1,0,0,,,
mUNC020504947,2,145478803,-,GAGGATCAGGGTAAAGCCTGAACTTTTGTATTCTATTTAACATGCACATC,,G,T,3,rs27261044,,,,0,,,,1,0,0,,,
S2T025827288,2,145682218,+,TTAAATAGACCAGGAAGAGTGATACCTAACCAGGCAGCCTTGGTGGAGGT,,T,C,1,rs27273814,,,,0,,,,1,0,0,,,
gJAX00506345,2,145918624,+,ATAGTATTCTTCCCACCCGGCGTCAGACTGCAGAAATAAGTACATGAGGT,,C,A,1,rs27272332,,,,0,,,,1,0,0,,,
SNJ025851247,2,146281182,-,ATGGTCTGCAGGCTAGCTTAAAAATCTGAGCTCTCAGACCATGCAAGGTG,,G,A,1,rs242093219,NOD/ShiLtJ,substrain,NOD/ShiLtJ,0,A,,,1,0,0,,CC,CC
SSH025853615,2,146340384,+,TACCATGTTCTCACAAAGTTAGACAAGAAATGATATTTCACATACCACTG,,G,A,1,rs27291383,,,,0,,,,1,0,0,,,
SBH025858075,2,146451884,-,CTTAAGACTGATGCTACATTGCAAAACATTTCTACAAATCTTTGTTAAAT,,C,T,1,,BALB/cAnNHsd,substrain,BALB/cAnNHsd,0,T,,,1,0,0,,,
DBC025861481,2,146537048,-,CTCTGGAAGGAGCATGTTAGGCAAGTGCTGTATCCAATTGGATGATTTAT,CTCTGGAAGGAGCATGTTAGGCAAGTGCTGTATCCAATTGGATGATTTAA,T,A,3,,,,,0,,,,1,0,0,SPIKE,,
S3C025863071,2,146576784,-,ACACACAAGCACTTTATATTTGGCCTAGACACAGAGAATGAGGAAAGTGG,,T,C,1,rs27313054,,,,0,,,,1,0,0,,,
gUNC4170760,2,146726906,-,GATATTACATTATTATTGGAGGAATGAGCCCAGCAGAATTACTAGAAAAT,,G,A,1,rs27290946,,,,0,,,,1,0,0,,,
S6R025872386,2,146809654,+,AATCTAATGTATCATAATTAATGTCAGCACCAATACAACATTTTGATCAC,,C,T,1,rs50613636,,,,0,,,,1,0,0,,,
S3C025878727,2,146968184,-,GAAGGTCAAACCTGTTGTCAGCTGGGACTGAGAGGACAAAGAGCCTGGGG,,T,C,1,rs29731449,,,,0,,,,1,0,0,,,
mUNC4181145,2,147575422,+,CAAGGACACAACTGGAGGCTGTAGGAAGAATTCATTGAGTTGGTGCATTG,,T,C,1,rs27309473,,,,0,,,,1,0,0,,,
D2T025910133,2,147753347,+,CAAGAAACTACTATAGTCATCCACACTTCCTAGGATTCCAAAGACACTCT,,C,T,1,,DBA/2NTac,substrain,DBA/2NTac,0,T,,,1,0,0,SPIKE,,
SFT025918243,2,147956092,+,AGTGCAATGTCTAAAATTCTGGAACTGCTTAGAAAACCACTTATAGAAAC,,G,A,1,rs6348886,,,,0,,,,1,0,0,,,
gUNCHS007216,2,148041082,+,GAATCCCTCCTCCTTCAATTTCTCTTCCTTGTGTTCTGAGGAACAATGTG,,A,G,1,rs28265663,,,,0,,,,1,0,0,,,
B10020148113,2,148113786,+,CTGGATCCTGGTATCCTCCTATGTAGGATATATACATATATCCTGCTTCT,,G,T,3,,,,,0,,,,1,0,0,,,
SFH025925531,2,148138276,+,AGATTCTGCTGGCTCCTCTGTGGTGGGAAACCCAATGCAGAGGGACAGAT,,A,G,1,rs27279732,,,,0,,,,1,0,0,,,
SNJ025934883,2,148372097,+,TGTGACAGAACACAGATGGGCTGAGGACAGCAGAGATTAGATATTAACTG,,C,A,1,rs27278554,NOD/ShiLtJ,substrain,NOD/ShiLtJ,0,A,,,1,0,0,,CC,CC
gUNC4194021,2,148517045,-,GATACGCAGATTTATGTGCACATGTATGCACAAATATATATGGATACAAA,,A,C,1,rs256161184,,,,0,,,,1,0,0,,,
S6T025941022,2,148525565,-,TTCAGGTCACGTACCATAGTCACTGGGGTTATCGCAATGGTGTTCTCCAT,,A,G,1,,C57BL/6JBomTac,substrain,C57BL/6JBomTac,0,G,,,1,0,0,,,
S3J025946710,2,148667756,-,TTCTGCTGATCTTTGAGTATGGGAGGCAGGGGTCAGGGTATGTCAGGTGC,,C,A,1,rs220999701,C3H/HeJ,substrain,C3H/HeJ,0,A,,,1,0,0,,,
gICR1173,2,149057968,+,ATCCTGTAGTTTGAATCTATTTTGCATTTTTCCACACATAATTTTAAAAG,,A,G,1,rs51948586,,,,0,,,,1,0,0,,,
SSR025964530,2,149113266,+,TTCATAACCAAAGAAGAGGAAGTTATAAAATTGTATGAATCATTCATTCA,,G,T,1,rs27293637,,,,0,,,,1,0,0,,,
gUNC4211212,2,149425713,-,TAAACTCGATACATAATTTCTCTATTCTCACACTTACAACCTTCTCATTT,,G,A,1,rs27296900,,,,0,,,,1,0,0,,,
S6N025984626,2,149615667,-,TCTAACAATTATTTTTCTATTATCATAGCATACATCATTTGTTTGCTTTC,,G,A,1,rs252392332,C57BL/6,strain group,"C57BL/6NJ, C57BL/6NTac",0,A,,,1,0,0,,,
S6R025996843,2,149921095,+,CTAGGACTGGGCTTGTGAAGCCAAAACCTAAAAGCTGTGGCTTTGTTATA,,C,T,1,rs252884453,,,,0,,,,1,0,0,,,
S2C025997549,2,149938740,-,CTTTGAACCTTCTATAGTGAGGATGATCATGCCAGGCATTGACTCTCCCA,,G,A,1,,,,,0,,,,1,0,0,,,
gJAX00101549,2,150045040,-,GGAGGCTGACTAACCCCTAATGTCTTCATGAAAACATGCTCAAAGCCTAT,,A,C,1,rs27386276,,,,0,,,,1,0,0,,,
S3T026034431,2,150860775,-,ACTGTAATTAGCAGTACTGGCAGTGATTAAAATTATAGCTAAAGGAATTT,,G,A,1,,C3H/He,strain group,"C3H/HeNRj, C3H/HeNTac",0,A,,,1,0,0,,,
gJAX00101614,2,150901451,+,TGGCTTTCTGTCAGGATATACCATGCATCAGGAAAGAGACGGAAACAAGT,,G,A,1,rs3704224,,,,0,,,,1,0,0,,,
S1J026042417,2,151060437,+,TGGTGGGAGGTCCTGTATTGACTGTGTGGTAGAAGTCAGGGTTCTGGTAC,,C,T,1,,DBA/1J,substrain,DBA/1J,0,T,,,1,0,0,,,
gUNC4231083,2,151212656,+,ACTTTATTCTTACTTAACCCTTACTGGCTAGCTATGTGAGATATGTAGAT,,T,G,1,rs45943484,,,,0,,,,1,0,0,,,
gUNC4239943,2,152156543,+,ACCCATCTCCACCTCTGGTGGAGTCCCCGTTTCTTTTAATCAGTAAAATC,,T,G,1,rs27385539,,,,0,,,,1,0,0,,,
mUNC020230950,2,152699661,+,TGTTGTGTTCTGTTCCCCAGGACATTAGACCTTCTCTGCCCAAAGAGGAT,,G,A,1,rs27372022,,,,0,,,,1,0,0,,,
B10020152827,2,152827269,+,GAGCATACCCTAAGTGACTATCTGAACTCATAGCTGCAGCCTCCAGGGAC,,G,A,1,,C57BL/10,strain group,"C57BL/10ScSnJ, C57BL/10SnJ",0,A,,,1,0,0,,,
gJAX00507625,2,153028580,+,TTTGTGGCATCCAAGGTCAAGTAAGGAAAGGTGGCAAGGCTGATTCCTAA,,A,G,1,rs27373887,,,,0,,,,1,0,0,,,
SAC026134991,2,153374797,-,TCTCTAATCTGTGCTACAATTTTGCTCCCAACAAAATTATCTTGCGGGCC,,T,C,1,rs50684593,,,,0,,,,1,0,0,,,
S3J026150124,2,153753115,+,GAACCAGGTTGAACATCAGTGCACTTGAAATTAGTGCCCTGGCATTGTAT,,T,C,1,rs27385089,C3H/HeJ,substrain,C3H/HeJ,0,C,,,1,0,0,,,
mUNC020233372,2,154144470,-,TTAGGACTGGGGGCCACTACAAGGGCAAAAGGGCCACTGTCCCTGCCAGC,,T,C,1,rs3673766,,,,0,,,,1,0,0,,,
S1L026169480,2,154237017,+,CTTTCAGACACAGTTGCAGAGACTGCTAATGCTGATGCAAGCTGTAAATG,,T,C,3,rs27315550,,,,0,,,,1,0,0,,,
gJAX00101874,2,154379034,-,TGGGAGCTTCAGTTAACACTCCCAAGGGAAACTAAGAGTGGGTGAAGTGA,,T,C,1,rs27366057,,,,0,,,,1,0,0,,,
SFR026189942,2,154748562,-,GTTTGAGCATCCATGTCTGATGACTTGCAACTTCTGCCCCCTTCTGGCTG,,G,T,1,rs108346473,,,,0,,,,1,0,0,,,
S1H026205445,2,155136133,+,TACCTTACTACCTCGAGGCGTGTGTCAGTTAGGAAGGTGGGAGAAAAGGA,,G,T,1,,DBA/1OlaHsd,substrain,DBA/1OlaHsd,0,T,,,1,0,0,,,
gUNCHS007416,2,155235429,+,CATTGTATGGTTGGGGGTCACCACAACCTGAGGAACTGAATTAAAAGGTC,,A,C,3,rs225106950,,,,0,,,,1,0,0,,,
SBC026226806,2,155670164,+,TATTTAGGCTCCAAAAGTCTGTAAAAAGTTCTTTGGCAATCTTGTTTGTA,,A,C,1,rs46616978,,,,0,,,,1,0,0,,,
SFH026230678,2,155766951,+,AGTCTGGGCTAACTGAAACCCTATTTCAAAAAGAAGAAAGAAGCAGGTGG,,T,G,1,rs29542802,,,,0,,,,1,0,0,,,
SAH026233156,2,155828921,+,TCTATATACCAACAAGAGGTTCTATCTAGAGAAGATGGAGAATGACAATA,,A,G,1,rs27323811,,,,0,,,,1,0,0,,,
gUNC4283429,2,155912292,-,GTTTTGCTTTGTTTTTGAGACAGGGTTTGTTTCTCTGTGTAGTTCTGGCC,,C,T,1,rs231349894,,,,0,,,,1,0,0,,,
DS4026253457,2,156336443,-,ATAAAGCAAATAGTCCTCTCTGTTGGAATGTCCTGGTCGACAATTCCACA,,C,A,3,,,,,0,,,,1,0,0,SPIKE,,
S6Y026254680,2,156367000,+,AGCTATACCCAGGGGATCATTTCTTCTCTATTTCTAATCTAAACTGCCTA,,A,G,1,rs27336889,,,,0,,,,1,0,0,,,
S6Y026254681,2,156367037,-,GCCTTTGTTCAAAGTGGGGTTAATTTTACACACACAATCCTGTTGTACTG,,C,A,1,rs48684769,,,,0,,,,1,0,0,,,
mUNC020326037,2,156378136,+,GAGAGAAGAGGTTAAAGAGAGGAGAGAGACATGCAGGGCATGGGGTGGGG,,T,C,1,rs226700412,,,,0,,,,1,0,0,,,
SAH026257226,2,156430655,-,TGAGAAAACTGAGATGCAGAGAGTGGAAGTGATTTGTCCAAAGCCACACA,,C,A,1,rs47848876,,,,0,,,,1,0,0,,,
S3J026268985,2,156724643,+,TAAATGTGAGCTTTTCCCTCCTCATAATATCTGGTCAGATTTTTCTTTGT,,G,T,1,rs236154216,C3H/HeJ,substrain,C3H/HeJ,0,T,,,1,0,0,,,
B6JB6CCPLHD01,2,157065076,-,AGGTGGAAGCCAGGGGAATGAGCCTGAAAGCCACCTGCTTTTATTCAGAC,,A,G,3,,,,,0,,,,1,0,0,SPIKE,,
gUNC4297878,2,157121889,+,TGGCAGAGCCCCGCAATCTGAACACAGAGTATATCTCGCTCACTGATCTG,,T,C,1,rs13463210,,,,0,,,,1,0,0,,,
S2T026296470,2,157411772,-,CCCTTCCAAAGCCCATTTCCTTCAGTGGGTCCCTGTGCTTCCCCAAAGCC,,C,T,1,rs252811113,,,,0,,,,1,0,0,,,
S1L026297640,2,157441020,-,CTAAGACAGAACAGTACTTACCAGAGGCTGAGGAGGAAAGAGAAAAGAGG,,T,C,1,rs48189322,,,,0,,,,1,0,0,,,
gUNC4303030,2,157610012,-,GGGGCTCTGTGATCCAGTTTCTAAGCTGTTGGCATTCGACACCAGCCCCG,,T,C,1,rs33406731,,,,0,,,,1,0,0,,,
D6R026313908,2,157847714,+,TGAACTCAGACTGTGAAGGCCTTGTTTTTAATCGTAAACTAAAGCCCCTC,,G,A,1,,,,,0,,,,1,0,0,SPIKE,,
gUNC4312479,2,158325263,+,AATGGTCCCTGGCTAATGTGCACAGATTTCAGAGACTCTGTGCACTGGAT,,A,G,1,rs27303791,,,,0,,,,1,0,0,,,
B10020158449,2,158449739,+,GCATTGCATGTGGGTTTTACCGGCTTAAACCCTGTCATTTCAGCAGATGC,,T,C,2,,C57BL/10,strain group,"C57BL/10ScCr, C57BL/10ScNHsd",0,C,,,1,0,0,,,
mUNC021898190,2,158578302,+,AGATTTTGGTGAACTTGAATTATGGATGACTAAATTCTTAATTGATGGAA,,T,G,3,rs27304388,,,,0,,,,1,0,0,,,
DAH026350664,2,158766604,+,AGGTGGTCAGTGTTGGGCTTTATCCTGTCAAATATTTTCTTCGAAGTCAC,AGGTGGTCAGTGTTGGGCTTTATCCTGTCAAATATTTTCTTCGAAGTCAG,C,G,1,,A/JOlaHsd,substrain,A/JOlaHsd,0,G,,,1,0,0,SPIKE,,
S1H026362327,2,159058190,-,CACAGGTCACCAGGCAAAGACAAAACCTAGGGAGGCTTCTCAGGTGACAC,,C,T,1,rs27320788,,,,0,,,,1,0,0,,,
S1H026362330,2,159058268,-,CCCACACGCTTACAAGAGTCACCTTCTAAGAGAAATCAACTCTGAAAAGG,,T,G,1,rs27320787,,,,0,,,,1,0,0,,,
S1L026375995,2,159399881,+,CTATGCTACAGTCTATATTTCTGTCTCATGCCTTCCCTGCCTTCTCCGGT,,A,G,1,,DBA/1LacJ,substrain,DBA/1LacJ,0,G,,,1,0,0,,,
SNJ026378256,2,159456409,+,GGTCCTATTAAGGTTCAGGATCTGCATCTGCAGCCTCATCTGCAACCTTT,,C,T,3,,,,,0,,,,1,0,0,,,
gUNC4331573,2,159492467,+,GCTTGGGCAGCATAATGTGATTTGATTCACTTTCAGACAGAATGTCCATG,,C,T,1,rs48026383,,,,0,,,,1,0,0,,,
mUNC020545758,2,159624662,+,CAAACAGTATGTGCTGTAATTGTTGAAAGACACTGAGACTAGGAAGATGA,,G,A,1,rs46087499,,,,0,,,,1,0,0,,,
S6J026395397,2,159884928,-,GGTAATTCAGGGCAGGGTGGATGCATCAGGCAGCCCTCCACACACACTCC,,G,A,1,rs33297866,C57BL/6J,substrain,C57BL/6J,0,A,,,1,0,0,,CC,CC
SNJ026412700,2,160317512,+,TTCCCACTGGAAACAATTACAGAAATTGCAGCAGGGTGCCAGTTACTTTG,,C,A,1,rs256586303,NOD/ShiLtJ,substrain,NOD/ShiLtJ,0,A,,,1,0,0,,CC,CC
S6J026413436,2,160335911,-,CTGGGGTTTCCTTCTTGTCATGTCCTCTACCTTCTTCACTTAAACCCATT,,A,G,1,rs33304994,,,,0,,,,1,0,0,,,
S3T026420524,2,160513114,+,TAGTTGAGTATGTCTCTGCCAAATATTCACAAGGGGAAAATCAACCCCAG,,C,T,1,,C3H/HeNTac,substrain,C3H/HeNTac,0,T,,,1,0,0,,,
S1J026425792,2,160644804,-,AATTCTTGTGAATATTTCAAAACTCAAGCCAGCTGGGCAGTGGTGGCATA,,G,A,2,,,,,0,,,,1,0,0,,,
mUNC020256510,2,160723842,+,GAGTTTTAGAGGTATATAAGGCTTGCGCTTAGAGAATGGGAGTAAACCTG,,T,C,1,rs33076467,,,,0,,,,1,0,0,,,
gUNCHS007610,2,161361718,-,CTATAAATGGACAAAACAAAGTCTGTGAGAAGGGTGGAGGTCTATGGAGG,,T,C,1,rs225947728,,,,0,,,,1,0,0,,,
B10020161719,2,161719748,-,GGGACAGAGCATCTACCATCAAGGAGACTACACAGTTAAGGAGAAGGCAT,,T,G,1,rs51326275,,,,0,,,,1,0,0,,,
gUNC4362102,2,161733403,+,TCAAGTCTATGTGATGTGTGTTGTGAATCACACCATGATTCCATGTTCCA,,C,A,3,rs29777225,,,,0,,,,1,0,0,,,
SFR026475530,2,161888262,+,ACAACCTAATCAAAAGCCAAGCAAATGGTGAGAGCAGAAACCTCACAGGG,,C,A,1,rs250706562,,,,0,,,,1,0,0,,,
SAH026478755,2,161968897,+,CTTTTTATTGAATGCAGTGTGCGCAAATGCGCAGAAGTCATACGTGTAAC,,A,G,1,rs27317813,,,,0,,,,1,0,0,,,
S3R026491133,2,162278337,-,TAGGTATGACAAGGTTTCACAAGGACATTTTTCTCTCTTTGTCTCTGTTA,,G,A,2,,C3H/HeNRj,substrain,C3H/HeNRj,0,A,,,1,0,0,,,
gUNC4371280,2,162351073,+,CTAGCTCCATTGATGAAATTCAGGTTCAATGAGAGACCCTGTCTCAAAAA,,A,G,3,rs33403112,,,,0,,,,1,0,0,,,
ST2026499508,2,162487713,+,AATAGATTCAAAATCCCAAAATGAGGGCTGGAAAGATGGCTAGCAATACG,,T,G,1,rs231969041,,,,0,,,,1,0,0,,,
SBR026508146,2,162703656,-,ATCTCCATCTTCTTTTCCTACACAAAATGAAGTTCCATGGTGTGTGTGTG,,C,A,1,rs33727898,,,,0,,,,1,0,0,,,
S1L026527090,2,163177250,+,TTCCCTTGGATTTAAGGACACTCAGCCTCTCAGAATCAGGAATTCCACAT,,C,A,1,,DBA/1LacJ,substrain,DBA/1LacJ,0,A,,,1,0,0,,,
gUNC4384936,2,163179125,-,CAGGAACTGGGGTTACAAGCAGTTGTGAGGCACCCAGTGTAGGCTCTGGG,,C,T,1,rs51952775,,,,0,,,,1,0,0,,,
gUNC020266358,2,163216671,-,TACATCTGTTGTTCCTTCTACTTGGAATAACGACCCAGGCTCTGATCACT,,C,T,1,rs27299580,,,,0,,,,1,0,0,,,
S1L026547999,2,163699989,+,CAGACAGACATGAGCTACCATCTGAGAGAGGAGGGGCTGCCACCTCCATT,,G,A,1,,DBA/1LacJ,substrain,DBA/1LacJ,0,A,,,1,0,0,,,
S3C026573137,2,164328431,+,CTTGGATTGTGTAACCTCTCAGGGATCTTGTCCATGGGGAAAAAGCTGGC,,T,C,1,rs247548293,,,,0,,,,1,0,0,,,
gUNC4402698,2,164366346,-,ACTTTTTCATTGGATTTAAAGCATCTTCCATATGGGGTAAATAAAGTGGC,,A,G,1,rs49712246,,,,0,,,,1,0,0,,,
gUNC4410736,2,164945693,+,AGATGGGAATACTGCATAGATTCCTCTGAAGTTCTTGTCTGTCACCTCGA,,T,C,1,rs46248753,,,,0,,,,1,0,0,,,
gUNC4417060,2,165406740,+,TGAACTGTGTTGTTGGTCAAGGCTGGTGGCAGTGCGGTGGCGTTAGCAGC,,A,G,1,rs28245269,,,,0,,,,1,0,0,,,
B10020165727,2,165727956,+,GGTGAAGAAGCTAGAAGACCCACACTGTGCATTTTCAACAGCCCTGCCTG,,G,A,1,,C57BL/10,strain group,"C57BL/10ScSnJ, C57BL/10SnJ",0,A,,,1,0,0,,,
gUNC4422942,2,165786100,-,TTTGGATATGAGTCTTATAAATGAATCAGGAGTTCTGTGAGGTCACCACA,,C,T,1,rs253542974,,,,0,,,,1,0,0,,,
gUNC4438722,2,166735011,+,TTTGCCATTTGCCACATGTGTGCAGTGCCCTATGAGGCCAGAGGAGGGTA,,T,C,1,rs47150097,,,,0,,,,1,0,0,,,
gUNCHS007733,2,166808040,-,ACACATGTGTAAGAAATGGCCCTGACAGGAGGTAACTTCACTCTAGGTTA,,A,G,1,rs215752032,,,,0,,,,1,0,0,,,
gUNC4447020,2,167537993,-,GCGTGGCGCTGAGATTCCGCTTGGGCTCCTCCCGGACCGGACCGCGCGGC,,A,C,4,rs27260491,,,,0,,,,1,0,0,,,
B10020167580,2,167580967,+,CTCTCTCACCCTGTGTCATCAGGAATAACAGCTGTTCCATGGACTGGGGG,,C,T,1,rs240321455,C57BL/10,strain group,"C57BL/10ScCr, C57BL/10ScNHsd",0,T,,,1,0,0,,,
gUNC4458398,2,168521036,-,AGATCACAGCTTGCAGTTATTGAAAGCTTGGGTCTGTCACTGTGGCCCTC,,A,G,1,rs27311458,,,,0,,,,1,0,0,,,
gUNC4460634,2,168665381,+,CCAGCCCTCATTCTCACCTTTCAAAGATTCCAAAGGTGAGTCTTTGAAAA,,C,T,1,rs27288103,,,,0,,,,1,0,0,,,
S6N026785120,2,169628022,-,ACATGGACCTTTGGGGTTGACATAGAGCATCACTGTAGGGCCTGGTCTCT,,G,A,1,rs224880752,C57BL/6NJ,substrain,C57BL/6NJ,0,A,,,1,0,0,,,
gUNC4478974,2,169701486,-,TGTTAGGACTTAAAGAGCAGTTATCTAGCATTGTGAGGACCTGCTTCAAT,,T,G,1,rs27637134,,,,0,,,,1,0,0,,,
S6Y026797047,2,169926182,-,CTGTGTGCTGGCTTGCTGAGCTAGGGCAAAGGATCCTTGGCTGCTTTTCA,,C,T,1,rs27612899,,,,0,,,,1,0,0,,,
gUNC4486158,2,170164440,-,GTGTTTGCTCTGCTTCTAGCAGTTTCGTGGGTCCTGGGTGGGATGGGGTG,,C,T,1,rs3142743,,,,0,,,,1,0,0,,,
gUNC4495566,2,170681071,-,CACACACATACACACACACACACACACAGAGGCTATGTAGCACAGGTTGA,,A,G,1,rs220656141,,,,0,,,,1,0,0,,,
SFT026847568,2,171189222,-,GGACCTTCCAGAATTCTGATGTCACAAACATCCTTGCCTTGGAAAAACCT,,G,T,1,rs27636598,,,,0,,,,1,0,0,,,
gUNC4505252,2,171223753,-,GCAACCGATGCAAAGGATTCCCATTTGTCTTCTATAGAGGAGGAAAGCTC,,A,G,1,rs27636497,,,,0,,,,1,0,0,,,
S6N026854614,2,171365357,-,GGGAGATTATCCCCAAAGCAGCTTTGTGCCTACATTCTGTGTCTTGCTCA,,G,A,1,rs254186583,C57BL/6NJ,substrain,C57BL/6NJ,0,A,,,1,0,0,,,
S3N026861337,2,171533432,-,AGTGTAATTCTGATGGAAGGCTCTGGCTGTTTAAATCCACTCCAAGGCTG,,G,A,1,,C3H/HeNHsd,substrain,C3H/HeNHsd,0,A,,,1,0,0,,,
gUNC4513522,2,171745710,+,AAGTCATTGCTTCCAAGTGAAAACTCCTTGGGTCCCTCACTTTGTGTTTA,,G,T,1,rs3679486,,,,0,,,,1,0,0,,,
SFT026879001,2,171975030,-,ACTTTATACTGTCACAGTTCATGTCCTCATGGGGATTAGATTCTTAGCGA,,G,A,1,rs212582847,,,,0,,,,1,0,0,,,
SAJ026906313,2,172657848,-,ATTCTCCTGAGTCCCTATGACCACACTCCTGAGACCCCTAGTGTCCCACA,,G,A,1,rs108616362,,,,0,,,,1,0,0,,,
mUNC4533318,2,172938117,+,GCTGGAGATCACAGGAGAGAGCAGGAGAGGCCATAAGCTCTGACCCTCAC,,G,A,1,rs33730049,,,,0,,,,1,0,0,,,
gJAX00103339,2,173937045,-,AAAGGAGTCAATACCAAGTCTCTAGCAGTCTCATCATGCTGCAAGGTCAG,,A,G,1,rs28335615,,,,0,,,,1,0,0,,,
DSR026972875,2,174321887,+,TCCTTTCGGTGTGACAAGTCACTTTAAATGGCTGTACTCCAGAAGCTTCC,,G,A,2,,129S2/SvPasOrlRj,substrain,129S2/SvPasOrlRj,0,A,,,1,0,0,SPIKE,,
gUNCJPD001093,2,174383619,+,TCTATTGATGCTTTAGAGTCACACAGTGTGTCTTTGTGTTACAGTGTCTA,,C,T,2,,,,,0,,,,1,0,0,,,
S2C026989936,2,174748413,+,AGCAGTGGTGGGTCCTTGGATGATGGGAACACTGGCTGTGGCAGCAATTT,,G,T,1,,DBA/2NCrl,substrain,DBA/2NCrl,0,T,,,1,0,0,,,
gUNC4558846,2,174752596,-,AGGGTTTTGGGGAAAGGGTGAATAGGGTCCAAATACATTGTTATGAACTT,,G,A,1,rs240042766,,,,0,,,,1,0,0,,,
DFH026990572,2,174764302,+,CTAAACCAAGAACCTTGAACTATGGGAGTTTCTGCCTTTTCATGATGCTC,,C,T,1,,FVB/NHsd,substrain,FVB/NHsd,0,T,,,1,0,0,SPIKE,,
DP2026995320,2,174883019,+,TCCAAGCCCTTACCACATTTGTCTTTCGTGGCAGACATATTTGTTATGCT,,C,T,2,,129P2/OlaHsd,substrain,129P2/OlaHsd,0,T,,,1,0,0,SPIKE,,
gUNCJPD001101,2,177075246,+,GGATGGTTTTGAGCCACCATGTGGTTGCAGGGATTTGACTCAGGACCTTC,,A,G,3,rs1133257377,,,,0,,,,1,0,0,,,
SFH027083995,2,177099876,-,ACTCCTGCCAAGGATGTTTTGTTCCCACTTCTAAGGAGGGGCATAGTGTC,,G,A,3,rs1133187902,,,,0,,,,1,0,0,,,
gUNC4569394,2,178623528,+,AGAAAAATGAAGTGAACACAGTAACATCACTGAGGTTCATAGCTTGGGAA,,C,T,1,rs27684224,,,,0,,,,1,0,0,,,
S1J027146949,2,178673729,+,GGGAGCAAGTCCTGGATGATCTGAGGCTGTGAGCTTCTCAGGGTCCTTTT,,G,A,1,,DBA/1J,substrain,DBA/1J,0,A,,,1,0,0,,,
UNC020555613,2,179085780,-,AGCTCAGAGCACCACTTCTTATACTGGGTGGCATTCATGGTCACCTGCTT,,C,A,1,rs50774873,,,,0,,,,1,0,0,,,
gUNC4580413,2,179281111,+,CTTTGCCATCTCACCACGGGACCAAGACTGACGGAGATTCAAAGTGTTTC,,G,A,1,rs27683386,,,,0,,,,1,0,0,,,
gJAX00512891,2,179293416,+,CCGGGCAAAGGGCTCATTTCCCATGCGCATAGTAATGCTGTGTTTTGAGT,,A,G,1,rs27683321,,,,0,,,,1,0,0,,,
gJAX00512917,2,179337489,-,ATGTCTCTTAAAGGATGGGGACATGAATCCATAGAGGGTCCCTAGTACTT,,T,G,1,rs27668072,,,,0,,,,1,0,0,,,
gUNC4584105,2,179526594,+,ATGGACCAGTGTCCACACAGATGAGCTGTACATGTATGCAGGCCAAAGCC,,G,A,1,rs45678526,,,,0,,,,1,0,0,,,
gUNC4587347,2,179732507,-,CTAGTTCAGCTTCTAGAAGTTCTGTAACTCCTAGTAAGGCTCTGAACCTG,,A,C,1,rs261960103,,,,0,,,,1,0,0,,,
gUNC4596439,2,180466158,+,TACCATGTCCTTCCATGGAAGGGTAGCTCTCATTTGAGTTTTCCTGGTGG,,C,T,1,rs27642033,,,,0,,,,1,0,0,,,
SAJ027219010,2,180475258,-,TCTGGAGTTGGGTTGCCGGCAGAGGAGGCCATCTCTATGTGCCTGTGTGC,,A,G,1,rs27641973,,,,0,,,,1,0,0,,,
S2J027222691,2,180567299,-,TGACCAATAAAGTTGCTCAATAGAGATTCAGGCCTCTTTCCCAGATTGCT,,G,A,1,rs27681837,,,,0,,,,1,0,0,,,
gUNC4601969,2,180998445,-,CTCTTTTGCTCCTCCCCAGTGGAGGTAGCCAGCAAGTACTGCACCAAGTA,,G,A,1,rs27694679,,,,0,,,,1,0,0,,,
B10020181023,2,181023939,-,TGTTTCTGCCTCTCTGGAATTAGAAGACTGAAAGTAAGATTTCTCATCAC,,C,T,1,rs246181041,,,,0,,,,1,0,0,,,
S2C027242456,2,181061415,-,AACACCCAGTTCTATGATCCCAGCAGTAGAAGGTAAAGGTTGATGTATGC,,C,T,1,,,,,0,,,,1,0,0,,,
SFR027243790,2,181094761,+,AGGGAAAGTACAAAGCTGTGTCCAGAACCAGACAGAAACATGTCCACTGA,,C,A,2,,FVB/NRj,substrain,FVB/NRj,0,A,,,1,0,0,,,
SNJ027246466,2,181161669,-,CTCTATGTACAGAGAAGAGAAACCAGATATATGAGGAACGAGGGTGGTGC,,G,A,1,rs27642241,,,,0,,,,1,0,0,,,
S2T027246659,2,181166494,-,TAACCACACCAGCCTTTATTTAAGGAACAAAATCAGAGTACCTTAAGTAA,,C,T,3,rs29812586,,,,0,,,,1,0,0,,,
S2J027268425,2,181710640,-,TATCTGCCCAGTGTCAATCCTATCCAGTGTAAAGTTTAAAGGCACAGACA,,G,A,1,rs244125300,DBA/2J,substrain,DBA/2J,0,A,,,1,0,0,,E2,E2
mUNC4608754,2,181796114,-,GAGTGCATGGGAGTGATTGCAAGATGCAAGTCCAGATCCATTTTCCCATC,,A,G,1,rs33762995,,,,0,,,,1,0,0,,,
B10030003399,3,3399074,-,TGCATTATTATATTTTAGATGCCTCTTTGCGCCTTAATGAAAGAAAGAAA,,C,A,1,,C57BL/10,strain group,"C57BL/10ScCr, C57BL/10ScNHsd",0,A,,,1,0,0,,,
mbackupUNC030360530,3,3785419,+,AATTTTGTAATTGCCATTTTATGCCATGGTCCTTTGGGAAAGATAGGAGT,,G,A,1,rs13476950,,,,0,,,,1,0,0,,,
SFR030155864,3,3896620,-,CCCTGCCCCAATTTCAACATATCTCAATATTTCCTCCTAAGCTCTCTTCC,,G,T,2,,FVB/NRj,substrain,FVB/NRj,0,T,,,1,0,0,,,
gICR1189,3,4372692,+,CCTTTATTAGTAATTAACATGTGCCAAGCGATGGTAGATTGGAAGCCACC,,C,T,1,rs255577037,,,,0,,,,1,0,0,,,
mbackupUNC030360676,3,4906679,+,TGCCCCTAACTAAAGAAAGGAGAAGACAACTTGAGCAAAAGCATTTATCT,,T,C,1,rs31735368,,,,0,,,,1,0,0,,,
gJAX00103952,3,5921871,-,CTCTTGGTGAAATTTAGAATACTCTTGTCTGAAATGTTCAGTTCTCTGCA,,C,A,1,rs30356912,,,,0,,,,1,0,0,,,
mJAX00514198,3,6290396,-,ATCTGGGTAGTGACACTAGACATAATTTTTATCTCCAGGTTCAATGAGGC,,C,T,1,rs50616096,,,,0,,,,1,0,0,,,
mUNC030749946,3,7184450,-,TCTACCCCAGATTTTCTTTCTCCTACCAAATTACCCACCTTCTATTCTAC,,T,G,1,rs30310397,,,,0,,,,1,0,0,,,
gICR1223,3,7739093,-,TTACTTTATGTCTTTTTTTTCATTTTTTTCCATTTTTTATTAGGTATTTA,,C,T,4,rs31595667,,,,0,,,,1,0,0,,,
SAH030317027,3,7925681,-,ACTAAAGTAAATACAGTAAAAGGAGAAGTGATTTTTAGCTTTTAGACCAA,,C,T,1,rs251042597,,,,0,,,,1,0,0,,,
gUNC4666739,3,8241121,-,GGGTACAAGAGGATATGTCAGGTTGTCCTATCTCTCTATGGAAAGCAGTT,,C,A,1,rs30462721,,,,0,,,,1,0,0,,,
SBJ030341629,3,8540745,-,ACCTTGGGAAAAGATGAATTTGGACATTATTGACAGATTTGTTGTTGTTG,,A,C,1,rs263142607,,,,0,,,,1,0,0,,,
gUNC4673471,3,8754874,+,CCAGGAAGATGGGAACGATGCATCTGTTTAATTGCATACCCCACACACAG,,T,C,1,rs29662125,,,,0,,,,1,0,0,,,
DS4030368062,3,9201551,+,AGTGCTCTCCTTATAATAAGTTAAGTTACGCATGCACTCACCACCCTATC,,T,G,2,,129S4/SvJaeJ,substrain,129S4/SvJaeJ,0,G,,,1,0,0,SPIKE,,
B10030009478,3,9478056,+,GCTATTACAAGCCACACCAATCCCATATTTGCTAAAGACACAGACCTAAC,,T,G,1,,C57BL/10,strain group,"C57BL/10ScSnJ, C57BL/10SnJ",0,G,,,1,0,0,,,
gUNC4683846,3,9527564,+,GTGATGAAACTAGAAACCTTAAGAGATTCCAGCAAGTTCTGTGAAATCAA,,A,G,1,rs45994947,,,,0,,,,1,0,0,,,
mJAX00104265,3,10128273,+,GGGGGCAGTTAAGCTGGTAATGGACCAGGATGTAGCAATCAGCAGACAAA,,G,A,1,rs30959673,,,,0,,,,1,0,0,,,
gUNC4702917,3,10748045,+,TGGGAATAGCTCAGCTATTATTCTAAGTGATTGTATGGGGGGACTTTCTA,,C,A,1,rs31101937,,,,0,,,,1,0,0,,,
S2J030435656,3,10891407,-,GACCATGATATCTAAAATGGAAATCTGGGTGTCTTGAGTCTTAATCTACC,,C,T,1,rs30592897,,,,0,,,,1,0,0,,,
S6Y030436428,3,10910707,-,CAATGGTTTAGGAAATAAACAGCCTCCTCAGTTGAAGTGAGAAGTGAAAA,,C,T,2,,B6N-Tyr<c-Brd>/BrdCrCrl,substrain,B6N-Tyr<c-Brd>/BrdCrCrl,1,T,,,1,0,0,,,
gUNC4707997,3,11180957,+,CGATGATCATCTAGACAGAAATCATATGTAAAGCTCACCATGCGTGGGGC,,A,G,1,rs29708373,,,,0,,,,1,0,0,,,
gUNC4710901,3,11440863,-,TGACTCCCTAATTGCCAATAATACACTTGAGGCAAGGTTAGTTGAATTTT,,C,A,1,rs31000760,,,,0,,,,1,0,0,,,
SFC030478770,3,11969255,+,TATAGAGAAAGGCCATTGACTTGTTTGATTTAATTTTATATCCAGATACT,,T,C,3,,,,,0,,,,1,0,0,,,
B10030012110,3,12110034,+,AAAATCAGGGACTAGACAAGGCTGCCTACTTTCTCCCTACCTTTTCAATA,,T,C,3,,,,,0,,,,1,0,0,,,
mbackupJAX00515140,3,12229171,-,TTTTCTTCACCCAATGTATAGTTGAGGTGTTGTGTGAGCAAATTGCTCCA,,T,C,1,rs33320244,,,,0,,,,1,0,0,,,
gJAX00104495,3,13194502,+,AAGTTACACTTTCTGCTTATGACAACCACAAATGCACTGCTTAATCACTT,,C,A,1,rs33379996,,,,0,,,,1,0,0,,,
S3T030527811,3,13195280,+,AAAAGCCTATTGTCTCATTTATGAGTTTTAAAAATCAGAAATTCCCCCAG,,C,T,1,,C3H/He,strain group,"C3H/HeNRj, C3H/HeNTac",0,T,,,1,0,0,,,
gUNC4743317,3,13724559,+,TTTTGGATTTTGTATCAATAAGAATTGTATTATAAAATAATGCCTTTCAG,,A,G,1,rs30660170,,,,0,,,,1,0,0,,,
gUNC4746232,3,13940116,-,AGGTTTTTTCCCTTAACTTCAAGCTTTGTCTGGACTTTTTTTCTTCTACA,,G,A,1,rs31048914,,,,0,,,,1,0,0,,,
B10030014313,3,14313171,-,GCCACTACCTGCTACCTGCCTAAGACAGAACCTAACAGGTTCTCCGAGAT,,G,A,1,,C57BL/10,strain group,"C57BL/10ScSnJ, C57BL/10SnJ",0,A,,,1,0,0,,,
gUNC4753984,3,14527026,+,TATTTTTCTTCCTAGAGCAATTTACATGGCCTGGAATGCATGAAAGCTCA,,C,T,1,rs31246730,,,,0,,,,1,0,0,,,
S6R030596924,3,14923120,-,ATACCTAGATATAAGATACAATTTGCAAAACACATGAAACTGAAGAAGAA,,G,A,4,,,,,0,,,,1,0,0,,,
gUNC4762747,3,15117705,-,TAGAAAGGCAGCAGCAGGCAAGTAGGAACAAGTGTGGAGAAAAAAAGTAT,,C,T,1,rs214107232,,,,0,,,,1,0,0,,,
S3C030611680,3,15292002,+,ATCCAACAGTTGTGTACTTGCAATACAGATATTCTTTTTATGCTGAAAGA,,G,A,1,rs247623372,,,,0,,,,1,0,0,,,
mUNC030015269,3,17006652,+,TTGCTCCTGTTCCTCCTCTTATTTTACTCTAGTCCCCTAGCCAATTGCCT,,G,A,1,rs47903303,,,,0,,,,1,0,0,,,
SNT030697126,3,17428167,+,ACCTGCTGGAAGTCAGCATGTAGAAAATTGCAAACTGACACATTCTTATC,,T,C,1,,NOD/MrkTac,substrain,NOD/MrkTac,0,C,,,1,0,0,,,
gUNC4791105,3,17831042,+,TTTAGGAAAATATTGGTTCATCGACTTATCTGTACTTGTGAAATGTTCTA,,A,G,1,rs31413561,,,,0,,,,1,0,0,,,
D6Y030724551,3,18113794,+,TATGGGACAACAGGAATAAAAGTTGAGAGTATACTCTCAACATGCACGTA,TATGGGACAACAGGAATAAAAGTTGAGAGTATACTCTCAACATGCACGTT,T,A,1,,B6N-Tyr<c-Brd>/BrdCrCrl,substrain,"B6N-Tyr<c-Brd>/BrdCrCrl, C57BL/6NCrl",0,A,,,1,0,0,SPIKE,,
SBR030729861,3,18246532,+,AACCTGGATTTCTGAGAAGAGTATGCATTTCTACCTGCATGTGTTACTCA,,G,A,1,,BALB/c,strain group,"BALB/cByJ, BALB/cByJRj",0,A,,,1,0,0,,,
SAJ030730719,3,18267991,-,CAGGGTCACAGAAAAAGCATGCTCTATTGTGCTGTGTCTCCAAAGGCCCA,,C,T,1,rs45879925,A/J,substrain,A/J,0,T,,,1,0,0,,CC,CC
gUNC4799475,3,18529609,-,ATGTGGATAAGACATAAGAACCTTAATCATCAATTTAATAAATCCTCACT,,G,T,1,rs52507563,,,,0,,,,1,0,0,,,
gUNC4805771,3,18953390,-,TAGAGATATGTTATATGTCTGTAAAAGGACAAATATATCTGTGTGCAAAT,,T,G,1,rs30557103,,,,0,,,,1,0,0,,,
gUNCHS008137,3,19203740,-,GTTTGGAGAAGGGCAGACTCTCTAAAGAGAAACTGCTATCAATTTTCCTC,,T,C,1,rs30315707,,,,0,,,,1,0,0,,,
S2R030777868,3,19446705,+,GTACTGGATTATCTTTGATATTCAGCAGTATGCTTGTGTTTATAGCTCTT,,C,T,2,,DBA/2JRj,substrain,DBA/2JRj,0,T,,,1,0,0,,,
B10030019528,3,19528002,+,AAAAAAGGGTGCAAGTCACGCTATGGTCAGTAGGACGCAGTGGGCTGGCC,,G,A,1,rs219777593,,,,0,,,,1,0,0,,,
SBB030805883,3,20147098,+,GCAACGGGCCCTCCGTGACTAGGGCCTCCATAATGCACAGTGCCTCTTGG,,C,T,1,rs33574705,BALB/c,strain group,"BALB/cByJ, BALB/cByJRj",0,T,,,1,0,0,,,
S6N030829549,3,20738731,-,CCCTACCTTGGGGCATACAATCTCCACTGGACCATGATCCTCTACTCTCA,,A,G,1,rs238048054,C57BL/6NJ,substrain,C57BL/6NJ,0,G,,,1,0,0,,,
gUNC4833458,3,20820672,-,TGCTGCAAGAAGCCTATCCACAACGTCCTTGTAGACTTCACTTTCTATTC,,C,T,1,rs30152977,,,,0,,,,1,0,0,,,
DP3030833133,3,20828331,-,CTTTTCCTAAGCAAATGATTTTAAGAGTCTGGAACATTGCAGCAGGGGGT,,C,A,2,,129P3/J,substrain,129P3/J,0,A,,,1,0,0,SPIKE,,
gUNC4836550,3,21048602,+,CAGATGTAAGTATTACTAACAGAATACAAGAGATAGAAGAGAGAATTCAG,,A,G,4,rs255319259,,,,0,,,,1,0,0,,,
S6J030852497,3,21312447,+,GTGAGGATGGAACCAGGGATTGCTAAAGCTGCTTGTCAAACTTTCATCAG,,A,G,1,rs48255329,C57BL/6J,substrain,C57BL/6J,0,A,,,1,0,0,,E3,CC
gUNC4850842,3,21992512,+,TATCTCTGCAGGCAAGCCTACCACAATGTTAATCTGATAAGTCTAGGTTT,,G,T,1,rs48321141,,,,0,,,,1,0,0,,,
S2T030880180,3,22004518,+,ATGACAATCTGCTTTTTCCTGAGGCAGGAAATGGTTGCTAAGGGAGAGAA,,G,A,1,rs31665545,,,,0,,,,1,0,0,,,
gbackupUNC030870967,3,22891613,+,TGGGGAAAAGAATTTTTCATGTTTTTCCCCACATGCCCATGCACAAAAGA,,A,C,1,rs36783131,,,,0,,,,1,0,0,,,
SS1030921256,3,23031408,-,TTTGTAACTGCACATCAGCATTTGAGCTATTTCTTATTTTTGCACACACA,,T,G,1,rs36535145,129S1/SvImJ,substrain,129S1/SvImJ,0,G,,,1,0,0,,CC,CC
DP2030927943,3,23198583,-,ACAGGGCTACTGAATCAGTTCACAAAGAAAAACATGCAAAGATCAGCAAG,,C,A,2,,129P2/OlaHsd,substrain,129P2/OlaHsd,0,A,,,1,0,0,SPIKE,,
gJAX00516851,3,23526512,+,TGGTATATTATTGAGTGAACTCTCTCAATGCCCTCATGACTGACATTGTC,,C,T,1,rs33657262,,,,0,,,,1,0,0,,,
gUNC4879415,3,24099619,+,CAGTGGCTATATAAATGCTTTGAGATTTTATTGCTGCTAATACTATTATT,,T,G,1,rs50066901,,,,0,,,,1,0,0,,,
B10030024366,3,24366280,+,TTACAAGCACTCATTCCCTTTTTATCCATTCATTCGCCCTGTTGGACCAT,,C,A,1,,C57BL/10,strain group,"C57BL/10ScSnJ, C57BL/10SnJ",0,A,,,1,0,0,,,
S2C030982927,3,24573187,+,ACTGGGAAATAACATGACACCTGACTAATGAAAGTTCATTTCTTTTTCCC,,C,A,1,,DBA/2NCrl,substrain,DBA/2NCrl,0,A,,,1,0,0,,,
gUNC4889029,3,24883654,+,AAGTTCAACACAAATGAAGAGAAATATTACTGTCTTAGCTCAGGCCACCA,,A,C,1,rs33735417,,,,0,,,,1,0,0,,,
DAC171866238,3,25428354,+,CTGCCTTCGGTCCCCCAATACTGACCGAGAGGTAACCCTGTCCCACTCTG,,G,A,1,,A/JCr,substrain,A/JCr,0,A,,,1,0,0,SPIKE,,
gUNC4894822,3,25490701,-,CCTTCAAAGGGGCACCATTCCTGCAAGATAATGTCATGGCAGGTAAAATG,,T,C,1,rs33776245,,,,0,,,,1,0,0,,,
D1H031037622,3,25940572,-,CATATGACCCATTAAGAGAGTTTTGCCTGCATATGCCCATGTTTAGTGAG,,T,C,1,,DBA/1OlaHsd,substrain,DBA/1OlaHsd,0,C,,,1,0,0,SPIKE,,
gUNC4904534,3,26331605,+,CACACTCAGTGTCTCACTCCTCTCGGCTTCCCTGGCTCCCACGGACTCGG,,T,C,1,rs30745460,,,,0,,,,1,0,0,,,
gUNC4911150,3,26940113,+,CTCTTCAGGTTCTATCTCCCCTCTGTTGAGTATTTCAGCTAATGTCATCC,,T,C,4,rs30953611,,,,0,,,,1,0,0,,,
gJAX00105532,3,27265127,+,ATGTCTCTATCACCCCACATGGTTCATCCAATGTAGCCTCACCTAGAATA,,A,G,1,rs29805357,,,,0,,,,1,0,0,,,
SNJ031103667,3,27591698,-,GGAGCACTAGCTCTCCTGTTGCATACCGTTACACACACACACACACACAC,,T,C,3,rs225033669,,,,0,,,,1,0,0,,,
gUNC4919034,3,27617397,+,AAAGGGCCAGCAAGCAGTTCTAACCTTTTCTCACTAGCAAGCAAGGAGGC,,G,A,1,rs241384042,,,,0,,,,1,0,0,,,
SBH031114864,3,27871618,-,TGAAGAAAACCGTCTCTCCCTCCCCCTGTAGCCTTCAACTACCAGTGGTT,,G,T,1,,BALB/cAnNHsd,substrain,BALB/cAnNHsd,0,T,,,1,0,0,,,
JAX00105599,3,28163630,-,TCTGTGGGTACCTTCAAGATCTTGGCAGGTCGGATTTCTCACCAATATCC,,G,A,1,rs29645340,,,,0,,,,1,0,0,,,
mUNC4926757,3,28182118,+,CAAGCATGTGTCATAGGATTAGAATATTTTTCTCTCCGGATTCATAGGTT,,T,C,1,rs29643448,,,,0,,,,1,0,0,,,
gUNC4927885,3,28285513,+,CTGTAAAGAGACACCATGACCAAAGCAACTTTTATAAAGGGCACCATTTA,,A,G,1,rs49882175,,,,0,,,,1,0,0,,,
SAJ031138751,3,28468788,+,GAGGTATCCCCTCAGCAGTCTATAGTCTGGGTCCTATCCACCCTGCTGGT,,G,A,1,rs29689086,,,,0,,,,1,0,0,,,
S1J031142167,3,28554185,-,ATTTCATCTTCCAAATTTTATAGAAAAGAAATGTAACAGTAGGTGCCTCT,,G,A,1,,DBA/1J,substrain,DBA/1J,0,A,,,1,0,0,,,
gUNC4936747,3,28906928,-,AATCATTCACCATGATCAAATAAGCTTCATCCCATGTATGCAAGGTTGTT,,G,A,3,rs240044293,,,,0,,,,1,0,0,,,
gUNC4944698,3,29476492,-,CTTCATTGCGGGTTAACAACAGGTTCTACTCTCATCCTTTGCCTAACAGA,,A,C,1,rs29752610,,,,0,,,,1,0,0,,,
S3T031206707,3,30167695,-,ATCTTGCTTCCTGGGATAGGAATCGTCAGTTCTCTTGATTTACAGAGTCC,,G,A,1,rs29815138,,,,0,,,,1,0,0,,,
S3R031208853,3,30221335,+,AATGTGAATACCACTGGTTCTTTTGAGAATGGGAGGAAACCAAAGAAAAT,,C,T,2,,C3H/HeNRj,substrain,C3H/HeNRj,0,T,,,1,0,0,,,
gUNC4958946,3,30551273,+,CCCCTCACACAGATTCCCCCCCCCCACTTCTCTTTCACCTCTGAGAAGCA,,G,A,1,rs30475229,,,,0,,,,1,0,0,,,
UNCHS008313,3,30719935,+,TGGATTTAGTTCCTTTGTCATGAGCCATGTTGGTGCCAATGTTCCTGCTC,,A,G,1,rs36869491,,,,0,,,,1,0,0,,,
gUNC4962432,3,30796339,-,GTCACATAACCTCAATGGACATCAGTTTGTCATTAAAATGAGGGTGAGAT,,A,G,1,rs52206019,,,,0,,,,1,0,0,,,
DFC031243632,3,31090806,+,GAGGGGACATGTTAAGATGTTCACCTAAGGGCCTTTCTCTTCTTTTTTTT,,G,A,1,,FVB/NCrl,substrain,FVB/NCrl,0,A,,,1,0,0,SPIKE,,
gUNC4974282,3,31644597,-,CAAAATGGCATTATAAATACTGCTCAATAAATTAAAGTCGGGGATTTAAT,,G,T,1,rs29857416,,,,0,,,,1,0,0,,,
S2H031267416,3,31685416,-,GTAGATAGTGTTAGAAATTTTCTCTGTAGTAGCTTGTTTTAAATATGTCA,,G,T,1,rs30846424,,,,0,,,,1,0,0,,,
B10030031810,3,31810331,-,CAGTTTCTGTTTTGCACTTCAGCCTAGATCAAGCACATGTCCCACTGAGG,,A,G,1,,C57BL/10,strain group,"C57BL/10ScCr, C57BL/10ScNHsd",0,G,,,1,0,0,,,
SAJ031279646,3,31991151,+,TGCCTCTGAGACTCGAGCCTTGAAATATTTAAAGATGAAGGCTTCAAAGT,,G,A,1,rs49710262,A/J,substrain,A/J,0,A,,,1,0,0,,CC,CC
mUNC030031869,3,32378673,+,GGGTCTTATATATCCCAGGCTTGAGTAGCAGGAGATAACCTTGGACCTCT,,G,A,1,rs30958010,,,,0,,,,1,0,0,,,
SSH031308287,3,32707176,-,CATTACTGCCAAGTGACCTGTGGGAGGGGTTGCTTACTTCTCAATGTATG,,G,A,1,rs29835729,,,,0,,,,1,0,0,,,
mUNC4993850,3,32940787,-,AACCCAGAGCAGACCACAAATTTGAATTTCTCTACCTGAGCTTAGATGGG,,A,G,1,rs31433517,,,,0,,,,1,0,0,,,
SAH031320605,3,33015136,-,TTTGTGTTTATTTCAGTAGGCTTGCTTGTCCCCTTGTGTTGCAAGGCTGC,,C,T,1,,A/JOlaHsd,substrain,A/JOlaHsd,0,T,,,1,0,0,,,
DBC031325022,3,33125568,-,ATGAGTCATCAGAGCCTCCAAGTATGGTTACACACCATTCTCCGTGTTCT,ATGAGTCATCAGAGCCTCCAAGTATGGTTACACACCATTCTCCGTGTTCA,T,A,1,,BALB/cAnNCrl,substrain,BALB/cAnNCrl,0,A,,,1,0,0,SPIKE,,
S3J031325675,3,33141892,+,ATGTCAGTGACGGGGCTATGCTGTTGGAATTCTACTCGGGTGATTCTGAA,,T,C,1,rs29892389,C3H/HeJ,substrain,C3H/HeJ,0,C,,,1,0,0,,,
gUNC4997380,3,33184130,-,GAACTCCTGAGTGAGGTATCTCAGACCCAAAAGGACATGCATGGTATGTA,,G,A,4,rs30108583,,,,0,,,,1,0,0,,,
S2T031327788,3,33194712,+,GAAGCAGAAGTGACTCTCCTTATAATCAGTGTAATTAACAAAAGCTTTGC,,A,G,1,,DBA/2NTac,substrain,DBA/2NTac,0,G,,,1,0,0,,,
S6H031356365,3,33909138,+,CCTCAGGGGGTAGAGAGGAGCATGGAAATGACAAAGATAACACCCAAGAC,,A,G,1,rs29893648,,,,0,,,,1,0,0,,,
gUNC5009091,3,34066622,-,CCCCCAAATAAAAGAGAGCCAGTTAAGAAACTTGTTTTATAGTTCTTATG,,A,G,1,rs29889348,,,,0,,,,1,0,0,,,
gUNC5013118,3,34317470,-,AAGAATGGTCATGAGTCAAATTTTCCTTGGTTCTAATCTCTGCCCAGCTC,,C,T,1,rs29862044,,,,0,,,,1,0,0,,,
gUNCHS008393,3,35306291,+,GGGGGGAGCTGCAAACCAACCTGTGTTGCGGTAATGGTTTTCTTAGTGAA,,T,C,1,rs30169867,,,,0,,,,1,0,0,,,
gUNC5036315,3,35986311,-,AACCACAGCAACCATGAGCCACAATGACAGTAGTCTCTCTTTTCATTATT,,G,A,1,rs52330651,,,,0,,,,1,0,0,,,
SFT031443172,3,36079307,-,CAAAGTAACAATTTAGCTTAATGAGTACGTGGTTTACCCACACAGGAGAA,,G,A,1,rs31605305,,,,0,,,,1,0,0,,,
gUNC5046545,3,36599358,+,TTATTCTTCGACTACAGCTATCATTACTTACCTGAATATGTGGCCAGCAC,,A,G,1,rs3151914,,,,0,,,,1,0,0,,,
B10030036675,3,36675646,-,TGGGGCCAACTTCTCTGCCCATTTCTTCTCTGTAGAAAAGGTCAGAGGGA,,C,T,1,,C57BL/10,strain group,"C57BL/10ScCr, C57BL/10ScNHsd",0,T,,,1,0,0,,,
S2J031478091,3,36952277,-,TGATATATTTAAGTTTTTCAAGTTTAGATATTCCAACACATGGGGAAGAC,,A,C,2,,DBA/2J,substrain,DBA/2J,0,C,,,1,0,0,,Consensus,Consensus
gJAX00106269,3,37105815,-,ATAAATTGAAGCAGTGAATTTCCCATGCTTGAATGAGGACAACCATTGAG,,A,G,1,,,,,0,,,,1,0,0,,,
gUNC5058455,3,37443062,-,GCCAAACAGTGGATGGAGCTTGGGGACTCTGATGGAATAATAGAAGGAAG,,T,C,4,,,,,0,,,,1,0,0,,,
SS1031518606,3,37965169,-,CTACACAACTGCAACATTCCCAATGGGTCCTGTGAAAGCAAAGCAGGGCT,,T,C,1,rs30131361,129S1/SvImJ,substrain,129S1/SvImJ,0,C,,,1,0,0,,CC,CC
mUNC030404303,3,38144509,-,AAAAGCTTCCTTACATAACAAAACACCAGGCACCCCAGGCACTAGACACA,,A,G,1,rs30142765,,,,0,,,,1,0,0,,,
SBT031527500,3,38187507,-,ACAACCCTAACTGTCTTGTGGGCTTCAGCTTATCTTGCTCCCCACTGCTG,,C,T,1,rs48606250,,,,0,,,,1,0,0,,,
gUNC5075799,3,38562456,-,AAGGATGGAGCAATGTCTGTGTAGAGGGTCTACACACCATCTTTCAGATT,,A,G,1,rs51653166,,,,0,,,,1,0,0,,,
S6T031543241,3,38581048,-,GATGATACCTGAAAGTTGTACTAAAACCTCTACACATATGTTATAGAACA,,A,G,1,rs52549695,,,,0,,,,1,0,0,,,
S2T031555906,3,38897662,-,CACTGGTCTCCTTTAAGGATGTCATAAATATCCTAAATGCCCGCCCCCAG,,G,T,1,,DBA/2NTac,substrain,DBA/2NTac,0,T,,,1,0,0,,,
gUNC5091100,3,39481860,+,AGACAATGAGATAGCTGTGTGGACTCCTACTTCACACATACAAGAAGTAC,,A,G,1,rs31335164,,,,0,,,,1,0,0,,,
SSR031601726,3,40043158,+,AGGAGCTGACTAGCAATCTGATTTATCCATCTACATAGTCTGGAGACTAA,,C,T,1,rs220138465,,,,0,,,,1,0,0,,,
gUNC5101169,3,40113716,-,TGATTAATGAATCTCACATATCTGTGATTTATCCTTAGGACATACTAATT,,T,G,1,rs29960125,,,,0,,,,1,0,0,,,
SNJ031605683,3,40142099,-,CTTTCTATTAGCCTCCAAACATAATTCAGCTAAGATATACACACAGGCTG,,G,T,1,rs213540984,NOD/ShiLtJ,substrain,NOD/ShiLtJ,0,T,,,1,0,0,,CC,Consensus
SBH031610566,3,40264157,+,AGCTGACAGAGTATAAACAAACTTCTCTTTCCATTCCTGCAAGGAAAGAT,,C,T,1,,BALB/cAnNHsd,substrain,BALB/cAnNHsd,0,T,,,1,0,0,,,
S3T031637201,3,40930029,+,ATGTTGTTGAGTCTATAATTTAGAGACATTCTCTAAATGTTACAGCCCTA,,G,A,2,,C3H/HeNTac,substrain,C3H/HeNTac,1,A,,,1,0,0,,,
gUNC5111362,3,41056761,+,CTCGAATGGCCCAGCTCATGGTCATGTCCATTCTGGACTCTCTCAGAAGT,,C,T,1,rs212852203,,,,0,,,,1,0,0,,,
DSB031657395,3,41434892,-,AGTCTCAATTATTCTGTTGGAGCAGCACAAAAGCAGAGACGGATAGGCAC,AGTCTCAATTATTCTGTTGGAGCAGCACAAAAGCAGAGACGGATAGGCAG,C,G,3,,,,,0,,,,1,0,0,SPIKE,,
gUNCHS008529,3,41647909,+,CTTTCTCATTATCATAAAATGCCAGTAGGAAGAAAATCTGCAGTATAACA,,A,G,1,rs51456776,,,,0,,,,1,0,0,,,
SBB031685245,3,42131131,-,TTGAGAACTGATCTAGTGCTTGCTTATTATTCATTGTCTTACATGGGAGC,,C,T,1,,BALB/c,strain group,"BALB/cByJ, BALB/cByJRj",0,T,,,1,0,0,,,
S2J031686484,3,42162104,+,GAGTTCCAATGCAGAGCCAGTTTTTTATTTCTTTAAGCTTTTAGCAGAAT,,T,G,1,rs30211320,DBA/2J,substrain,DBA/2J,0,G,,,1,0,0,,E2,Consensus
S6J031696725,3,42418128,+,AGAAACATCTAAAAATACTCCCGTTCCCTGTCTAATTGGGTGTGTATGAG,,T,C,1,rs30413677,C57BL/6J,substrain,"C57BL/6J, C57BL/6JEiJ",0,T,,,1,0,0,,E2,E3
mbackupUNC030068994,3,42552195,+,GGTATAGTCCATGTGTCCACTGTGGTTAAGATTCAGAACTGTGCATTTTG,,G,A,1,rs47933729,,,,0,,,,1,0,0,,,
gICR1289,3,42604996,-,CTGGATAATTAAGACATTATTAAGGAATGTTTTAAAATCTTTAAATAAAA,,G,A,1,rs31247959,,,,0,,,,1,0,0,,,
gUNC5141136,3,43409674,-,GCCCTGATAGACAACTATCAATATGCAATCTGGCACAATCACTGTCAGGA,,G,A,1,rs31630055,A,strain group,"A/J, A/JCr, A/JOlaHsd",0,A,,,1,0,0,,,
B10030043474,3,43474243,+,TGTGACAAAAGGGGTTTTGGAGGCCTTACCAGAACATCTGCTGGAGACAT,,C,A,1,,C57BL/10,strain group,"C57BL/10ScCr, C57BL/10ScNHsd",0,A,,,1,0,0,,,
S6H031748833,3,43720831,+,TTATTTTTACTTTTTATTGATTCTTTGTGAGAATCACATTATGCACCCCA,,C,A,2,,C57BL/6JOlaHsd,substrain,C57BL/6JOlaHsd,0,A,,,1,0,0,,,
SFH031756283,3,43907097,+,TATATCTTGTACTTGATTTCTTTAGCTCAAATTACAGTTATAATGAGCTT,,G,A,1,rs45721827,,,,0,,,,1,0,0,,,
S3R031757419,3,43935493,+,TTTTACAAACAATAAGACTAATCAATAAAAAAGAATATCCACAATAAATA,,C,A,1,rs52377979,,,,0,,,,1,0,0,,,
mJAX00521416,3,43980905,-,TTGTTTATATTCCTTCTCAAGCAGGTTATAGGCATGGGTTCTTCTGAATT,,G,A,1,rs46024973,,,,0,,,,1,0,0,,,
S2C031793204,3,44830103,-,TTTATGCGCAAATAGTTTATTTTTATAACCTGCAACCAATAAGTCATTTA,,G,A,1,,DBA/2NCrl,substrain,DBA/2NCrl,0,A,,,1,0,0,,,
gbackupJAX00106851,3,44983565,-,GTCCGAGGTGCTGGAATATACAGCAAAATACTGCTTGCTTTGCCCCAGTT,,T,C,1,rs6218822,,,,0,,,,1,0,0,,,
gUNC5165298,3,45576390,-,TATTATGTTCCCATTATAGCAATTTTTAGACTAAGGAGTATTTTGAGGTT,,T,C,1,rs217296550,,,,0,,,,1,0,0,,,
gUNC5166570,3,45665090,+,AGCGATGATCTCAATCCTGAATAAGAAGGCATTGTCTAACAAAATGTATG,,G,T,1,rs49119497,,,,0,,,,1,0,0,,,
D2H031842095,3,46052377,-,GAGAAGTGAGTATTTTGGAGCTTGTGGAGTAGATATAGAGTGGGTATTGG,,C,T,2,,DBA/2JOlaHsd,substrain,DBA/2JOlaHsd,0,T,,,1,0,0,SPIKE,,
B10030046336,3,46336312,-,TGTTTATTTTGCAGGATTAAAGGAGAGCCATAGCAGTCATCCCTGAATGG,,C,T,1,,C57BL/10,strain group,"C57BL/10ScCr, C57BL/10ScNHsd",0,T,,,1,0,0,,,
gUNC5178113,3,46494346,+,TCCACAGAAGAATCAAGAAGCCACAGGAACACTAGCAGAACTTCTTTGGT,,A,G,1,rs218594225,,,,0,,,,1,0,0,,,
gUNC5182782,3,46809519,+,GTTATATATTCTGTTTTACACAAGAATATAAACCACAGCTCCAAATACTC,,G,A,1,rs30659567,,,,0,,,,1,0,0,,,
gUNC5194701,3,47653945,+,GAGCACTGCAATTGTGTCTACCTTATAAAGATCAAAATGATCATATGTTT,,T,C,1,,,,,0,,,,1,0,0,,,
S3J031906659,3,47666486,+,AAATACACATTGATGAAATGTTTCAAAAGGCATGGTATGAAATAGTACTG,,T,C,1,,C3H/HeJ,substrain,C3H/HeJ,0,C,,,1,0,0,,,
DBR031931010,3,48275272,-,TGAATGTCGCTCCAACCTCAGCAGAATGAATCTGTAGGGAGTAATTTTGT,,C,T,2,,BALB/cByJRj,substrain,BALB/cByJRj,0,T,,,1,0,0,SPIKE,,
gUNC5208223,3,48565951,+,GCTGATTAAGCAACGGCTGGCAGGATAAAGAAATGGGTGAGACATCTCCC,,A,G,1,rs31670628,,,,0,,,,1,0,0,,,
DT2016208086,3,48603564,-,CCGGCCGGGCACATGGTCACCTCTTCCCTCTTCGAAGCTTGCCCTTTGAG,,G,A,1,,129T2/SvEmsJ,substrain,129T2/SvEmsJ,0,A,,,1,0,0,SPIKE,,
gUNCJPD001254,3,48786379,-,ATCCATGTTCAGTGCTCCTCCATTTACAGTAGTTAGGAAATGGATGCAGC,,G,A,1,,,,,0,,,,1,0,0,,,
SBJ031952786,3,48819658,-,CCTCTTCATAATGATACTTGTCTCTTACAATGTGGAATCAATAAAATCTT,,C,T,1,rs239097256,BALB/cJ,substrain,BALB/cJ,0,T,,,1,0,0,,,
gUNC5221772,3,49408904,-,ATGTGTCCTTATTACATGTTGGAGCATCTTCTGGGTATATGCCCTGTAGA,,C,T,3,rs30163215,,,,0,,,,1,0,0,,,
D6T031985224,3,49630605,+,TAAATACTTTGCAAACCGGAGGACACTGGCCTGAAAGAATGCTTCTGAGT,,G,A,1,,C57BL/6JBomTac,substrain,C57BL/6JBomTac,0,A,,,1,0,0,SPIKE,,
SFR031990952,3,49773804,+,AGAGAACCTGACATCCTGGGTCTGGGCTGCACGCTGGGCATTTTGAAAAG,,T,C,2,,FVB/NRj,substrain,FVB/NRj,0,C,,,1,0,0,,,
S3N032013704,3,50342603,-,CAAGCCATACTCCCAGTACAGATATTCTACATAAACCAAAACCATGTGCA,,A,G,1,rs30047677,,,,0,,,,1,0,0,,,
S2R032015131,3,50378279,-,TAGATAACCAGTTCCTCTACCTGGCGCTTTCCTTTGGCAGGGCTGGAGAG,,G,A,1,rs30044578,,,,0,,,,1,0,0,,,
gUNC5236692,3,50391959,+,AGCTAGCCAGAAGAGAGCCCCCAGGCTTCCTCATGTGTAGGAAGGAATGC,,A,G,1,rs30045937,,,,0,,,,1,0,0,,,
gUNC5248278,3,51266168,+,AAAATTAGGACAAAATCAAATTAGTACACCACCACTATTAAAATCAGCCT,,G,A,1,rs31667354,,,,0,,,,1,0,0,,,
gUNC5261264,3,52161293,-,AGCATCGAGAAATGCATGAATGTATGTGCTCACGTGCTTGCACTTAGTTT,,T,C,1,rs31142846,,,,0,,,,1,0,0,,,
D2R032088684,3,52217117,+,GAAAATGTTTCATTGCAGGGTTTACTGTGCCAGACAGTAATGAGGGCAGT,,A,G,3,,,,,0,,,,1,0,0,SPIKE,,
D3C032113129,3,52828227,+,AGCTGAGGAAGAAGAGGAGGATTGCCTGTGTCTGAAGATCTTTCCTTTCT,,A,G,1,,C3H/HeNCrl,substrain,C3H/HeNCrl,0,G,,,1,0,0,SPIKE,,
mUNC030074556,3,52973026,-,GTTTTCTGAGCTAGCAAGATTACTTATCCAGAGCCCCAGCTAGTCCTCAC,,C,T,1,rs30304242,,,,0,,,,1,0,0,,,
SBR032134332,3,53358318,-,TTATGCAATTTATATATTAGAACTTTATTGAATGAGGAGCTGGTCAAAAA,,T,C,1,rs51428448,,,,0,,,,1,0,0,,,
DX1024362798,3,53687965,-,GACTTGCCATTGTGCTTGCCAACAATGGAGCTGACTTGTCTCCATGACAT,,G,A,1,,129X1/SvJ,substrain,129X1/SvJ,0,A,,,1,0,0,SPIKE,,
gUNC5287977,3,53889338,+,TTTCTGCCCCGTGTAGAACTGAACTGTGTTTTCACTAGAAGTTGGTGTTA,,A,G,1,rs30434779,,,,0,,,,1,0,0,,,
gUNC5295127,3,54397745,-,ATTGTAGGCAGTATTGAAATGGTCCCCTTTCTGAACTCCCAGTGAGCAAA,,C,T,1,rs30480065,,,,0,,,,1,0,0,,,
B10030054475,3,54475575,-,CAAGGCTGATATGAAGATCACAGGAATGGAAGTGCACCATCTACTGCTTC,,G,A,1,,C57BL/10,strain group,"C57BL/10ScCr, C57BL/10ScNHsd",0,A,,,1,0,0,,,
SBH032193258,3,54831474,-,ATCCTCTATGTCACAGTTTGGCTCAGCAACAAAGCAGTGGGCAGTAAGGT,,T,C,1,,BALB/cAnNHsd,substrain,BALB/cAnNHsd,0,C,,,1,0,0,,,
S6J032196596,3,54914906,+,GCACCAGACACCTGACCGCACAAGGCACACAGGCACAGTCCACAAACCTG,,A,G,1,rs30751697,C57BL/6J,substrain,C57BL/6J,0,A,,,1,0,0,,E3,E3
gUNC5303774,3,54980726,+,TGAGACAAAGGGTGGACAGACAAACATCTGAAAAGAATGCAATGCTTCTG,,T,C,1,rs242667550,,,,0,,,,1,0,0,,,
S2C032202249,3,55056247,+,CTTTTGCTTAGAAATAAAATCCACCCCTAAATTCTAAAAGCAGTTCCAAA,,G,T,1,,DBA/2NCrl,substrain,DBA/2NCrl,0,T,,,1,0,0,,,
S3J032216939,3,55423494,+,TGCATTTGCCTCTACTCATTACTGAATAGGTGTGATTTTAGAGAAAGCTG,,G,A,1,rs223942944,C3H/HeJ,substrain,C3H/HeJ,0,A,,,1,0,0,,,
S3J032221017,3,55525445,+,GAGGACAGTGAGCATTGGGTCCAGCAGTTGTCCCTTAATGTCCCCTGAGT,,G,A,1,rs229032160,C3H/HeJ,substrain,C3H/HeJ,0,A,,,1,0,0,,,
gUNC5312572,3,55590544,+,TGACACAAAGAACCTCACTCGTCAGATGTCACTTGGTTGGTGTGTGCCTG,,T,C,1,rs49623681,,,,0,,,,1,0,0,,,
DFH032228437,3,55710926,+,AACAAGTGTCCTAAGTATCTTCCCCCGACAATTTCAATAAGAGCTCACAC,,A,G,1,,FVB/NHsd,substrain,FVB/NHsd,0,G,,,1,0,0,SPIKE,,
gUNC5318563,3,56095361,-,GAGATTAAGACCTCATTCAGTGGAGGTTGGAGAATGCACATGTTTAGTCC,,T,G,1,rs31289368,,,,0,,,,1,0,0,,,
SBJ032260408,3,56510214,-,GCTTATTTAGAGCTAAGTATCAGTCTCAGAACATATCAGTAGGGTTGTTC,,G,A,1,rs257473368,BALB/cJ,substrain,BALB/cJ,0,A,,,1,0,0,,,
gUNCJPD001278,3,56849530,-,GTAAGATGGGACCTCATAAAATTGCAAAGCTTCTGCAAAGCAAAAGACAC,,G,A,4,,,,,0,,,,1,0,0,,,
SBH032281388,3,57034716,-,AAGTTTTCAAGCAGGAAGTTTATGCCTATATTTACATTGAATAATCAGAT,,T,C,1,,BALB/cAnNHsd,substrain,BALB/cAnNHsd,0,C,,,1,0,0,,,
gUNC5336362,3,57475004,+,TGTAACGGGGACCATGCTGTTTCTGGATGGGTTTGGGGTGAGGAAAACAA,,T,C,1,rs30941821,,,,0,,,,1,0,0,,,
gUNC5340488,3,57777706,+,TTTGGGGATTCAGATCGAGGGTATAAGCATATATGAAGCATATAGCCACT,,T,C,1,rs30515123,,,,0,,,,1,0,0,,,
SFT032312646,3,57816152,-,GGTGAGTTCTTGACAATGAATCTGTATTTAAAACTGAGCTAGACTGGGAG,,C,T,1,rs47175027,,,,0,,,,1,0,0,,,
gUNC5346073,3,58201146,+,CAGAAGAGCTGACACTTAGCAGCACAGCAGTAACAATTACCCATTAAGAG,,A,G,1,rs219051749,,,,0,,,,1,0,0,,,
S6R032356494,3,58912350,-,CAATACAAAAAGCCCAGGGCCAGACTGTTTTAGTGCAGAATTTTTCATTG,,C,T,1,rs30842393,,,,0,,,,1,0,0,,,
S2R032369628,3,59240700,+,ATCTTGGCCTACCTCTATGACCTCTACGTATCCTGCAGCCACCTCAGAAG,,T,C,1,rs30107063,,,,0,,,,1,0,0,,,
B10030059242,3,59242110,-,ATGAGAAGGACTCTGCAAGTTGGTCCAAGCAAGAGATGCCTATGATGGCC,,C,T,1,,C57BL/10,strain group,"C57BL/10ScCr, C57BL/10ScNHsd",0,T,,,1,0,0,,,
gUNCHS008823,3,59322589,+,AGCACCAAGAATAAGCTAGGACAAAGGTGATATAACAGGTATAAATATAT,,G,A,1,rs30409672,,,,0,,,,1,0,0,,,
gUNC5359394,3,59574730,+,AGATATGTTAAGATACCTGTTTTCCTTGTGATTCCAAATTTCATCAAGTT,,A,G,1,rs30011271,,,,0,,,,1,0,0,,,
ST2032416060,3,60401505,+,AGATAATATTCAAGGACTGTCAAATATCACCTTTCCTTATAGAGTTTTAA,,G,T,1,rs242898796,129S,strain group,"129S1/SvImJ, 129S2/SvHsd, 129S2/SvPasOrlRj, 129S4/SvJaeJ, 129S6/SvEvTac",0,T,,,1,0,0,,,
S6N032417060,3,60426503,+,AACTTCACAATTTTACTGGCTCTGTAGCTATTACTATTTTTAATTTAATG,,A,G,3,rs240482631,,,,0,,,,1,0,0,,,
mUNC030077897,3,60480321,+,CATGAAAACTATATTTCCTGAACTGTCTACCAATGTCTGGATTCATGTGT,,C,T,1,rs30457563,,,,0,,,,1,0,0,,,
S1H032434856,3,60871403,-,TTGCATATATCACATACTCTTCTTGAAAAATAATACTGAAGAAGCCTTTC,,A,C,1,rs48931333,,,,0,,,,1,0,0,,,
gUNC5373318,3,61220059,+,ATGCCATGCCAATTCCCAGAACTCCAGAATCAGTGTGGATACCCCAAACC,,C,A,1,rs47064658,,,,0,,,,1,0,0,,,
S6J032449077,3,61226937,-,AGGCACTTCATATTGTTTGATTTGTCCTTTTGCCATCCAGGAATGATTTC,,A,G,1,,C57BL/6J,substrain,C57BL/6J,0,G,,,1,0,0,,E3,Consensus
SAH032478677,3,61966943,+,TACAATTCTTCACTTATTTTCTCTTTCTTACTTTTAACATTTTTGTGTTA,,T,C,1,rs31440372,,,,0,,,,1,0,0,,,
gUNC5384072,3,62298941,-,GTCAGGTGAGTTACAGCAGGCTTTGTAGTTTGATTTGAAGTTTCCATAGA,,C,T,1,rs30500521,,,,0,,,,1,0,0,,,
gUNCHS008861,3,62710131,-,TAACTCCTAAGAGGAAGCCCGGAGATGTGACCAGAATATGTGCCTTATCC,,T,C,1,rs36334345,,,,0,,,,1,0,0,,,
UNC5389257,3,62798722,+,AGCCCAAAGATTCTAGATCAGAATAAATGGGGGCAAAGGCTTGTGAGGGA,,C,T,1,rs30848741,129S1/SvImJ,substrain,129S1/SvImJ,0,T,,,1,0,0,,CC,CC
S3J032522727,3,63068191,-,TGGCAGCTCATCTTGGCTCAGTGCAGCCAGTACAGGGTCTTGGAACAACA,,C,T,1,rs241471824,C3H/HeJ,substrain,C3H/HeJ,0,T,,,1,0,0,,,
gUNC5393311,3,63143005,+,TTTCTGAATCTCATAAAATGATCCCCAAACAATCATCAGGTACTTGAGTG,,C,T,1,rs30112414,,,,0,,,,1,0,0,,,
S6H032546393,3,63659826,-,AAATCCTGTATGTAAGATTCTTCCATTTACAGTCATCTATATGGAACATA,,A,C,2,,C57BL/6JOlaHsd,substrain,C57BL/6JOlaHsd,0,C,,,1,0,0,,,
DS6032564340,3,64108514,-,AGTCTAGATAAGTTCCCAGGGCTTGACTACCACAGTGTGCTGGAAGTATA,AGTCTAGATAAGTTCCCAGGGCTTGACTACCACAGTGTGCTGGAAGTATT,T,A,1,,129S6/SvEvTac,substrain,129S6/SvEvTac,0,A,,,1,0,0,SPIKE,,
gUNC5403659,3,64156281,+,CTGTCTCTACAATTTGTTTAAGTGTGAGAAACTATGTTGGGTACTTCCTA,,C,T,1,rs31051256,,,,0,,,,1,0,0,,,
S6J032571692,3,64292324,-,GTTTGGGACAATGTTGCACTAGAATATCATTCAAGCAGGTCATCATAGTA,,A,C,1,rs6251307,C57BL/6J,substrain,C57BL/6J,0,A,,,1,0,0,,E3,Consensus
gUNC5404579,3,64727873,-,GTGCATGTCTGCTCATTTATAAAAGGTAAAACAAAAGAGTCACCTGAGGT,,A,C,4,rs215651983,,,,0,,,,1,0,0,,,
B10030064866,3,64866804,-,CGACCTTCAGCTAGTCTCTCAATGTAAGAGACTAGAAGGCTACTCTAAAT,CGACCTTCAGCTAGTCTCTCAATGTAAGAGACTAGAAGGCTACTCTAAAA,A,T,1,,C57BL/10,strain group,"C57BL/10ScCr, C57BL/10ScNHsd",0,T,,,1,0,0,,,
mJAX00525099,3,64905011,+,TTGGTCATTGTAATCAAGACACAGAGGGAACTGCACATAACTACTGTTTG,,T,C,1,rs36679965,,,,0,,,,1,0,0,,,
S3R032598467,3,64961676,+,TTGTATATTCTTGGACCAGAGTGTGGAACCATCTGGAGGTGTGGCCTTGA,,T,C,3,,,,,0,,,,1,0,0,,,
S3J032613535,3,65338398,-,CATCAGTACAATAGTAAATCAGCTAGTCCCTCCCCATCAAAGGCTTTGGG,,C,A,1,rs229821403,C3H/HeJ,substrain,C3H/HeJ,0,A,,,1,0,0,,,
S3C032620697,3,65517441,+,AACAATCACATAAACCTGGAGTGAGGGTGGAGTCTCTTTCCTTTAAGTGA,,T,C,1,rs31677300,,,,0,,,,1,0,0,,,
D1L032627290,3,65682271,-,AGGCCAGAATACAATGGGTGAATGATTATGTCAGTCCCCTGCCACTGATA,,G,A,1,,DBA/1LacJ,substrain,DBA/1LacJ,0,A,,,1,0,0,SPIKE,,
DS4032628577,3,65714444,+,TGTTGCTAACTGGCTGCTCACCAGCAACTTTTCTGAAAATTCCTCGGTAC,,C,T,2,,129S4/SvJaeJ,substrain,129S4/SvJaeJ,0,T,,,1,0,0,SPIKE,,
gUNC5417881,3,65737570,+,AGTAGGGGTCATAATTCTGAACCCCGGATTAGGACAAATAACTGACAAGC,,A,G,1,rs30892299,,,,0,,,,1,0,0,,,
mJAX00525416,3,66208516,+,TTAAGGTGGGGCTCAAGAAGAGGAAGCATGAACAAAACTGTCCAAAGCAA,,A,G,1,rs36338870,,,,0,,,,1,0,0,,,
S2J032660745,3,66518641,-,TCATATTACCAATTGAAAGGTTGATAGCAATTTTTCCTTTGATATCACCT,,T,C,1,rs31579176,DBA/2J,substrain,DBA/2J,0,C,,,1,0,0,,E2,Consensus
SFT032662274,3,66556862,-,TAGGATATTCCTAAAGTGAAGAAGTATTAGTGTATATTGCAATCCATTTT,,G,A,1,rs38223712,,,,0,,,,1,0,0,,,
gUNC5435272,3,67182474,-,GAGCACTACAAGGTATTTTTTCTCCACCTATAACTATTGCAGGTTGTTGC,,G,T,1,rs38275836,,,,0,,,,1,0,0,,,
gUNC5440607,3,67616729,-,CCTTCAAAGCTATCCTACATAGCACTTCCCTCCACCTTCATTAAAGACCA,,A,C,1,rs245492144,,,,0,,,,1,0,0,,,
UNC5440607,3,67616729,-,CCTTCAAAGCTATCCTACATAGCACTTCCCTCCACCTTCATTAAAGACCA,,A,C,1,rs245492144,,,,0,,,,1,0,0,,,
DZO032724254,3,68106354,+,TATGCAAGATAGTGGCCCAATGCAGTAGATGAAGAAAGGCTATAGCAAGA,,G,A,1,,NZO,strain group,NZO/HlLtJ,0,A,,,1,0,0,SPIKE,,
gUNC5451861,3,68333235,-,ACCAAACTTTGCTGTGATGTCATCTGCTTGTTTTTTTGTGCTGAAGAACC,,A,C,1,rs31439758,,,,0,,,,1,0,0,,,
DSR032738171,3,68454289,-,CAAACTTCTTCCACGCCCCCTCAAGACTCTGCCAACAAGAAAACCATTAC,,G,A,2,,129S2/SvPasOrlRj,substrain,129S2/SvPasOrlRj,0,A,,,1,0,0,SPIKE,,
S2T032743801,3,68595048,-,ACAAGGACTCCTTGGGCTCCCAGCACACTCGGATCACATGTGGCTGTCTG,,G,T,1,,DBA/2NTac,substrain,DBA/2NTac,0,T,,,1,0,0,,,
gUNCHS008973,3,68814147,-,CTCAGGGTCTGATGCCTGGTAGCAGATGCACTTGGCTTTGGAATGAGATT,,A,C,1,rs30698152,,,,0,,,,1,0,0,,,
UNC5464045,3,69279129,+,GGGTAGCCACAATAATCAGGGTCTTTTGTGATTCTTTATAAGTCTTTTAC,,C,T,1,rs222885362,129S1/SvImJ,substrain,129S1/SvImJ,0,T,,,1,0,0,,CC,CC
S1J032776491,3,69412297,+,AAGACAGACAGACAGCCGTGCATACATACAAAATAAAAGCCCACGTGTCT,,C,T,1,,DBA/1J,substrain,DBA/1J,0,T,,,1,0,0,,,
gUNC5466669,3,69433592,-,AAATGCACCATCAACATACTCGAAACCGGAATGGCCCCACATTCTTCCCT,,G,A,1,rs30999342,,,,0,,,,1,0,0,,,
gUNC5471789,3,69758858,+,GCTTATGCATGGACAGACTTATTCTCATATGGACTTTGCCTCAGTCTGTA,,G,A,1,rs31380345,,,,0,,,,1,0,0,,,
S3R032811099,3,70277495,-,TCTGCATATATGTTATGGTTGTATAGCTTGGTGTTCTTATGGGACTCATA,,T,C,2,,,,,0,,,,1,0,0,,,
S3T032812984,3,70324605,-,TGCTTGGCAAGCTTTAAGAGAATACCGTTATCTGAACTTTAAAACATCAG,,A,G,1,,C3H/HeNTac,substrain,C3H/HeNTac,0,G,,,1,0,0,,,
mUNC5482456,3,70639048,-,ATGTTGAAATCTAAACAACACTCACAGACTTTTGTCAGGACATCAGCTCT,,A,G,1,rs30164936,,,,0,,,,1,0,0,,,
S3J032832098,3,70802452,-,AAAGCGCTACCAGCAAACACCAAAAAAGTTCTGTTCTGACATCTGTGTTC,,G,T,1,,C3H/He,strain group,"C3H/HeNCrl, C3H/HeNHsd, C3H/HeNRj, C3H/HeNTac",0,T,,,1,0,0,,,
SNJ032836722,3,70918058,+,TATATGCTGCCTGGTTGGTGACTTAGTGTCTGAGAGAACTCAGAGCTCTG,,G,A,3,rs232567341,,,,0,,,,1,0,0,,,
gICR1328,3,71273566,+,CTGACCCCTGTTGTTGAATTAGGGAAAGTCTGAAAGAAGCTGAGGAGAAA,,T,G,3,rs6236939,,,,0,,,,1,0,0,,,
mbackupUNC030473223,3,71939894,+,GAATATCGTCCCCATTAAAAAGAGGACAGAAAAAAAAACAATATTTCAGT,,A,G,1,rs51132560,,,,0,,,,1,0,0,,,
gUNC5508250,3,72242455,+,ACCTTGACTCCTGCAGTGATGGACTAGTGCATAGAACTCGAAACTGACAT,,G,A,1,rs31047731,,,,0,,,,1,0,0,,,
S3J032895222,3,72380553,+,AGCAATCAGGAGTCTCCAATAGTTCCTCAACTAGAAATGGCCTCGACAAG,,G,A,1,rs256211034,C3H/HeJ,substrain,C3H/HeJ,0,A,,,1,0,0,,,
S6N032911366,3,72784165,-,ATAGGAAGTGGCAACAATTAGGAAGTGTATCTTGTTGGAATGGGTATGGT,,G,A,3,rs263745211,,,,0,,,,1,0,0,,,
SBH032917410,3,72935254,-,TGTTTGAAAGAATATTAGGAAAGAGTTCTTAAGGCAAGCAAAATTTATTT,,A,G,2,,BALB/cAnNHsd,substrain,BALB/cAnNHsd,0,G,,,1,0,0,,,
SFJ032919899,3,72997491,+,TTCCCCATAACTTTCTGACTCTGTTTTACTGTATGCTATACGAGTTTCTC,,A,C,1,rs387367036,FVB/NJ,substrain,FVB/NJ,0,C,,,1,0,0,,,
gJAX00108948,3,73110678,-,GACAAATCCACAGCATCTATAGAGACTGCAAAGCCTGCACTAGCTATGAA,,T,G,1,rs30754294,,,,0,,,,1,0,0,,,
B10030073462,3,73462565,-,TTAATTCCCAAAACTAACTGCTGAGAATATGACTGTGTTATGTCTCTATA,TTAATTCCCAAAACTAACTGCTGAGAATATGACTGTGTTATGTCTCTATT,T,A,1,,C57BL/10,strain group,"C57BL/10ScCr, C57BL/10ScNHsd",0,A,,,1,0,0,,,
gUNC5525340,3,73742144,-,CTTTGCACAGATGCCTATAATGGGATGTTCATGATCACATAGCACTTGTA,,G,A,1,rs31024189,,,,0,,,,1,0,0,,,
SFC032949688,3,73742200,+,GTGCTATGTGATCATGAACATCCCATTATAGGCATCTGTGCAAAGTTTCT,,G,A,1,rs31024191,,,,0,,,,1,0,0,,,
gUNC5532424,3,74163450,+,ACTAATCTAATCCTTTATGAAACTGTAAACAGACAAAAACAATGTCAGAA,,C,T,1,rs30944804,,,,0,,,,1,0,0,,,
B10030074486,3,74486068,-,TTTGTGAATACATTGTGAAGTCATATATAGCCTTAACTCCTTTTGAATCT,,T,C,1,,,,,0,,,,1,0,0,,,
gICR5342,3,74751140,+,ACTACATTCAGTTAGCTTAGTAAGGATAAACTCTAAGTATTATGAAGTTT,,G,T,1,rs108747541,,,,0,,,,1,0,0,,,
SFH032991585,3,74789641,+,TTGAAAGACATGCATCTATAATCTACTTCTTCCAAGCTGACCCTCTCCTT,,T,C,1,rs50740720,,,,0,,,,1,0,0,,,
S1J033010767,3,75269176,-,CTTAAAAAGCATCTACACAACAATTTACATCCTTATTCATGTCTTATCAA,,G,A,1,rs231309745,,,,0,,,,1,0,0,,,
gUNC5549545,3,75402482,-,AATGAGTTCTTTTGTGTGAGTAACAGGTTCTAGCATAGACAAGTCAAGAT,,C,T,1,rs30107658,,,,0,,,,1,0,0,,,
DS6033024935,3,75623394,-,GTCTCTGGCTTGCATATTTTAATTTTTCTGGTTTCTGGGGAGAGGTGAGA,,C,T,4,,,,,0,,,,1,0,0,SPIKE,,
gUNC5560335,3,76071624,-,ACTAGGAAATTGCAAGGCTGTGATTCATTTTCTTTTTGAATGATGTTGTG,,C,T,1,rs242654334,,,,0,,,,1,0,0,,,
UNC5560335,3,76071624,-,ACTAGGAAATTGCAAGGCTGTGATTCATTTTCTTTTTGAATGATGTTGTG,,C,T,1,rs242654334,,,,0,,,,1,0,0,,,
SS6033043033,3,76075830,-,CAAAACACACTCAGATCACACTGCCAAATGACAAAAGGAACATAGCTTCA,,G,A,1,rs31098673,,,,0,,,,1,0,0,,,
S1H033052622,3,76315567,-,TATGCAAATTATCAGTGTAATGTTAGGTCCTAGATGGGTACAATGAAAAC,,T,C,1,rs30205170,,,,0,,,,1,0,0,,,
S1J033060446,3,76511162,+,TTTTTAGCTGTGTATTTCATAAACTACCCATTGTTCCAGGATTAAACAAA,,G,T,1,,DBA/1J,substrain,DBA/1J,0,T,,,1,0,0,,,
gUNC5567230,3,76609413,+,ATTCTTAGCTTGCCTCAAACCATGTGTTTGTAAAGGTCTCCTTTTATCAC,,T,G,3,rs49274321,,,,0,,,,1,0,0,,,
gUNCHS009090,3,76848854,-,ACTGGCTATGATTATTCTCTAGGTCCCTGGTAAACCCTTTGGTAAATAGA,,A,G,1,rs30104120,,,,0,,,,1,0,0,,,
S3J033107274,3,77681874,+,ACAAATAAGTCAGATATTAAAACACCTTGGTGTTTGTTTTACAGGTTCTC,,G,A,1,rs238995331,C3H/HeJ,substrain,C3H/HeJ,0,A,,,1,0,0,,,
gUNC5586083,3,77907770,+,ACATTTAAAAAGCAGACCAATCAAGCCATTAAAAGGAACCCACTAAGCAA,,C,A,1,rs30547301,,,,0,,,,1,0,0,,,
UNC5586083,3,77907770,+,ACATTTAAAAAGCAGACCAATCAAGCCATTAAAAGGAACCCACTAAGCAA,,C,A,1,rs30547301,,,,0,,,,1,0,0,,,
JAX00109308,3,77912812,-,CAATGCCTCAGATCTGTCACTGTGGTTTTAGATGTTTCTGTCCTGTAAAA,,A,G,1,rs3672971,,,,0,,,,1,0,0,,,
B10030077985,3,77985163,-,GGTTCAGTTGATGTCTCAATCCCATTGCTTGGATCCTTGCCTGGTTATAG,,A,G,1,,C57BL/10,strain group,"C57BL/10ScCr, C57BL/10ScNHsd",0,G,,,1,0,0,,,
gUNCHS009111,3,78230342,-,CTATTTCTACCTCCCTAATATTGAGATTATCAATGTGAGCTCCCATGCCA,,T,C,1,rs13477215,,,,0,,,,1,0,0,,,
SAJ033132313,3,78307845,-,GTTTGGATAGCTTAATAACTGGGTAACATGTACAGTCTTCTGTCATCTGG,,C,T,1,rs245458446,A/J,substrain,A/J,0,T,,,1,0,0,,CC,CC
S3N033134031,3,78350798,+,CAGAACAAGCTATTGCTAAGTATAGATATAGGGGATGAAAGGAAGGAGGG,,A,G,2,,C3H/HeNHsd,substrain,C3H/HeNHsd,0,G,,,1,0,0,,,
S6N033136475,3,78411899,+,CTGTTTCAGCAGCAATGTCAAGAAGCCCAAGAATTCCATAACTTTAAATG,,G,A,1,rs240392629,C57BL/6NJ,substrain,C57BL/6NJ,0,A,,,1,0,0,,,
backupUNC030615251,3,78594019,-,TACACCCTTGCTTGGTCTTTTTCAACTTTGTGCCTACTTTTTCATTAATT,,C,T,1,rs50213140,,,,0,,,,1,0,0,,,
mbackupUNC030615251,3,78594019,-,TACACCCTTGCTTGGTCTTTTTCAACTTTGTGCCTACTTTTTCATTAATT,,C,T,1,rs50213140,,,,0,,,,1,0,0,,,
S3J033147205,3,78680126,-,ATCATCGGGTCAACCCCATAGGTAGGGCCTTGCCTTTGGTCTAAGTGGTG,,G,A,1,rs232307422,C3H/HeJ,substrain,C3H/HeJ,0,A,,,1,0,0,,,
UNC5598889,3,78797844,+,TTTAGGTCTTTCTTGGCTCTTATTCCTTAGCTGTGATAGTTTAGAATTTT,,A,C,1,rs31202506,,,,0,,,,1,0,0,,,
SS6033151917,3,78797946,+,TTTCTGTTTCTTGTGTTCCATTCTCAATGCAAGGTGTTGCTTATTGGGTA,,G,A,1,rs31089934,,,,0,,,,1,0,0,,,
gUNC5599491,3,78846279,+,AAAATATACTGGTCAAGTTCACGGGGGGAGATAGAAAAATTAGGTGGCTC,,G,A,1,rs3668425,,,,0,,,,1,0,0,,,
UNC5599491,3,78846279,-,ACCAGCCCCTTAGCAATATTAAGAATTAAAGCCTCCTCTTTCAGAAGGCA,,G,A,1,rs3668425,,,,0,,,,1,0,0,,,
SS6033155763,3,78894099,-,AGAGCAGCATCTTCAGAGGAAGACTTGTTAAGAACAACTCATCATGGTGG,,G,A,1,rs49241404,,,,0,,,,1,0,0,,,
JAX00109398,3,79109418,-,AACACAAATGGATACCTTAAACCAGAGGCTTCAAAAGCAATCCTGACCCA,,T,C,1,rs30752917,,,,0,,,,1,0,0,,,
gJAX00527593,3,79317471,+,TGGTCCCTCTGCCCTAGTATTATACAAAAAATACAAATGCTTGCAGCTCT,,A,G,1,rs31096985,,,,0,,,,1,0,0,,,
SS6033174875,3,79371882,-,TGCAACAGTGTGAAATGTACTCAATGCTGCAAGCAGAAAATGGAGGGAAC,,A,G,1,rs31217608,,,,0,,,,1,0,0,,,
UNC5618267,3,80127197,-,AATAAAAGTGACTGTGGTGTTTTGAATGAACATGCCTGCAATAGACTCAT,,C,T,1,rs31051018,,,,0,,,,1,0,0,,,
mJAX00109485,3,80261724,+,GAAAGCATCCATCTGTACCTTTCTCAGGTCTCTTCATCCACAGGCTACTG,,G,A,1,rs13477220,,,,0,,,,1,0,0,,,
mUNC030121003,3,80984503,-,AATTTGTCACATTTTATATTCAAACCAAGAAATGTTCCTATACTCTAAGC,,T,G,1,rs243812754,,,,0,,,,1,0,0,,,
gUNC5637295,3,81296361,+,CCATCTATGACTCCCTCACCACTGTTGGGATCACATGCTCTAAGTCCTCC,,A,G,1,rs32624947,,,,0,,,,1,0,0,,,
SAJ033252640,3,81316003,-,CATTAAAGTGGCCTTTGTTTCCATCTCATTTTCCCTACAGGTTTCTTTCT,,G,A,1,rs30356150,A/J,substrain,A/J,0,A,,,1,0,0,,CC,CC
B10030081791,3,81791256,-,CTACCAGGAAACAGGCAGGCGAACCATGTCCATAGTCCAAAAGCTTAGGC,,C,T,1,,,,,0,,,,1,0,0,,,
gJAX00109616,3,82005274,-,AGATGGACAGAAGTGCTTCCTTCAAATACGTTGTTGAAGGATAAGGAAAA,,A,C,1,rs31452476,,,,0,,,,1,0,0,,,
UNC5649841,3,82192938,+,GTATTTTCCTTGTTAAGCAGAGACTGCCTTCCAAAGGCTACAGAGAGGAA,,T,C,1,rs31617616,,,,0,,,,1,0,0,,,
D6R033295055,3,82376377,+,TATTCCATCCTAATCATGCGCATGGCATGATGTATTTTCTAAGTGCGAGA,,C,T,1,,C57BL/6NRj,substrain,C57BL/6NRj,0,T,,,1,0,0,SPIKE,,
gUNC5653396,3,82430691,-,CCATATAATTACTGACATCAGGTCCTCCCTAATTTACTAATTAAGTAAGA,,G,A,1,rs47775212,,,,0,,,,1,0,0,,,
SS6033309060,3,82726504,+,AAGGTTAGACCTTAGGCTCTATCCTTCTGCAGCTAAGAAGAGACACTCAA,,A,C,1,rs30510371,,,,0,,,,1,0,0,,,
DP3033313079,3,82826992,+,CTGCAATAAACTCCCTAAATTATCTCTGCTTGCTACACGGCAAATGCACA,,G,A,2,,129P3/J,substrain,129P3/J,0,A,,,1,0,0,SPIKE,,
gUNCHS009192,3,82839728,+,AACAGTAAAAGGCATACACCTTCATTTAATTTTGATAAGTATATAAGCAA,,T,C,1,rs47714334,,,,0,,,,1,0,0,,,
UNC030485727,3,83052457,-,GAGGAACTCAAAATGGCTGCCTAGTTCAAATTGCCTTGTGCAGTGTAGTC,,A,C,1,rs46348794,,,,0,,,,1,0,0,,,
UNC5664114,3,83145735,+,CCTGGACTCATCTTACAAGAGGTCTTTTTATGTTGCCTTTCTTGTGCAGG,,G,A,1,rs30743840,,,,0,,,,1,0,0,,,
SS1033340832,3,83520801,-,TTTTATTGAATTTGGAAAGAACACACGTAACATCAACACCGATTGGCAGA,,C,A,1,rs251245395,129S1/SvImJ,substrain,129S1/SvImJ,0,A,,,1,0,0,,CC,CC
UNC5669462,3,83575270,-,ACATTCAAGTTTCTTGTATGAAATGGCATAATGGTTTCACGTCACCCCAC,,C,T,1,rs249055055,,,,0,,,,1,0,0,,,
gUNCHS009204,3,83644289,-,CTCATAGATGTAGAAGATGGTAGTGTAGCAGTAGATCTTCCCAATCTAGG,,G,A,4,rs257496268,,,,0,,,,1,0,0,,,
UNC5672509,3,83828215,-,ATACTTAAAGGTGACTACATTTTAGATTACACATGCACACGTGTATAGCA,,T,C,1,rs31112104,,,,0,,,,1,0,0,,,
gUNCHS009214,3,83895122,+,ACCAAAGCCGCTTCCCTTTGTAGCAGGGAATCCTTAGAGAAAAACCACTA,,G,A,1,rs45754882,,,,0,,,,1,0,0,,,
SBR033363410,3,84085253,-,GGGCAGGGCCAAGGACTCTTGCTAAAATGAAGTGTATATGAGTTTCCCTC,,C,A,1,rs38785660,BALB/c,strain group,"BALB/cByJ, BALB/cByJRj",0,A,,,1,0,0,,,
JAX00109777,3,84164501,-,CCCTGAGTTGAGCCCATCAGAATCAATGCAAATTCCCCAAATTTCCTGGG,,A,G,1,rs30253608,,,,0,,,,1,0,0,,,
mUNC030314030,3,84293362,-,AGATTAAATTTCTTCTCTAAAGTGAAAACTGTTCAATTTTCACTTCTTTT,,G,A,1,rs50102345,,,,0,,,,1,0,0,,,
gJAX00528804,3,84715352,+,CAAGCTAATAAAAGTCCCCAGGAAGGATTTGGTTGGGCTATCTAGGTTTC,,A,G,1,rs36417615,,,,0,,,,1,0,0,,,
JAX00528824,3,84769495,+,GAAAACTTGGAATTACTAAAATGGCAAACTAATGAGTGTCTGAAGTCACC,,G,A,1,rs30558547,,,,0,,,,1,0,0,,,
UNC5686125,3,84801245,+,CCGACATCTGCGTGTGTTCTGATGGACTGTTATGGTGTTGCTGGATCCTC,,G,A,1,rs30750412,,,,0,,,,1,0,0,,,
SAH033394051,3,84851291,+,TGTAGGCTCCCACAATGTCTCTTTCTACAGAAGGTTTTGTTCTCACTTTC,,T,C,1,rs32718251,,,,0,,,,1,0,0,,,
UNC5688280,3,85042492,-,ATCCTACAGGGAAGCAGTCTCAGTACCACGTGTATTAATACCGTGATTGA,,G,A,1,rs30460952,,,,0,,,,1,0,0,,,
UNC5690039,3,85146443,-,ACCACTGTTCTCAGAAATCCCTCAGGCTGTCAGTGTGGCATGAGACTTCT,,C,A,1,rs31241756,,,,0,,,,1,0,0,,,
S2T033415421,3,85385544,+,GATATGACATTGAACTTCTTGGTCAGTTTAATCACTAGTAAATTCATTTT,,C,T,2,,DBA/2NTac,substrain,DBA/2NTac,1,T,,,1,0,0,,,
gUNC5694185,3,85407650,+,AAAGGAACATTTCACTAAAGTAGACACAGGCGAAAAGCTAAGGCAGACTC,,A,G,1,rs31137896,,,,0,,,,1,0,0,,,
UNC5699578,3,85834887,+,CACTGAAGATGACAGCAACAACTGTGCATCCTTCCGAATACCAAAGGTGC,,C,A,1,rs37891764,,,,0,,,,1,0,0,,,
S3R033440224,3,86005615,+,GAGCTTGGAGTTCACCTATTAAAGCAGCCTGATAAATGGCAGCTGCTGTT,,C,T,1,,C3H/He,strain group,"C3H/HeNRj, C3H/HeNTac",0,T,,,1,0,0,,,
mUNC030135021,3,86011519,+,AGGTCACTTCAATCTTTGCCTCTTGAGTGTCACACCTTGTTGACTCATTC,,C,A,1,rs47422263,,,,0,,,,1,0,0,,,
SBC033448082,3,86202067,-,ATGTGCCACTCTCACCAGGCACAAATCTAAACTTTCATTGCTACTGCTCT,,T,C,1,rs32811544,,,,0,,,,1,0,0,,,
gUNC5711888,3,86905954,-,CGGATCCTTCTGAATAAAAAGACTGCCCATTCCTTTGAGCAGGTCTTAAC,,T,C,1,rs30843429,,,,0,,,,1,0,0,,,
JAX00110025,3,87457108,-,GCTGGTACGTTGTAATAGGTGGGCTCCTGGGGTTCTGAATCTGAAGGGTT,,G,A,1,rs31330866,,,,0,,,,1,0,0,,,
S6N033498372,3,87459322,-,AAGCTTCAGGAAGTCATGACTTGTATCCACCTGTCTGTCACAGGTCAAAT,,C,T,1,rs254592967,,,,0,,,,1,0,0,,,
B10030087637,3,87637760,-,TTCACTCTAGGTAGTGTCAAGCTTTAGTGCTTATACACACACCTAGCTTA,,C,T,1,,C57BL/10,strain group,"C57BL/10ScCr, C57BL/10ScNHsd",0,T,,,1,0,0,,,
gUNCHS009315,3,87753280,-,TAACTGCACTGCCAGGAGGCAAGGCATAAAGGAAGGGATCTTGCTGAAGG,,C,A,1,rs249729997,,,,0,,,,1,0,0,,,
UNCHS009315,3,87753280,-,TAACTGCACTGCCAGGAGGCAAGGCATAAAGGAAGGGATCTTGCTGAAGG,,C,A,1,rs249729997,,,,0,,,,1,0,0,,,
gJAX00110122,3,88755140,-,CTAGAAGGCAGGGACATTTATGAAAGATGACAACTCCAGCAAAAACAACC,,G,A,1,rs30558951,,,,0,,,,1,0,0,,,
gUNC5732520,3,88854960,-,TACTCAGTGGAAGGAAGTATAGGTAGGTCATTTTCTCATCACAGGTGTGT,,T,C,1,rs30910063,,,,0,,,,1,0,0,,,
UNC5733646,3,89069915,+,AAAGAGATCATCTATAATTCTCAGTGTAGAATTAAAAATAGTTGTCCTTT,,G,A,1,rs258383234,,,,0,,,,1,0,0,,,
JAX00110148,3,89108199,-,ACAAGGTGGTGTTACCTTCATCACTTCAAAATAAACAAAAATTTCTAAAA,,C,T,1,rs32926617,,,,0,,,,1,0,0,,,
UNC5736210,3,89354671,+,AGATCTCCACCATGCCCTCCAGCTTTATCTGCTCTACACCTCAAACAAAA,,T,C,1,rs50670233,,,,0,,,,1,0,0,,,
gUNC5740658,3,89763013,+,ATAAGAGGGGAAGGAGGGAGGGGATGTGGGTAGGAAAGAGCACTAACCTG,,G,A,1,rs47451526,,,,0,,,,1,0,0,,,
gJAX00110225,3,90132263,+,GTAGAAGACCCAGTTCAGTTCTCAGGCTCCAAGCAGCTTTTTAAGTCTAA,,T,C,1,rs31360834,,,,0,,,,1,0,0,,,
JAX00110225,3,90132263,+,GTAGAAGACCCAGTTCAGTTCTCAGGCTCCAAGCAGCTTTTTAAGTCTAA,,T,C,1,rs31360834,,,,0,,,,1,0,0,,,
UNC5747116,3,90412813,+,TCCTAGGAAGTCCCACTGCTAGTGTGATGACCAGCCCCAGGGCAGCTGCA,,T,C,1,rs30306135,,,,0,,,,1,0,0,,,
JAX00529857,3,90576094,+,ACATCTAAGCACATTTGTACTATTTGGCAATGATGTAGGGCAGTGGTAGA,,A,G,1,rs51008786,,,,0,,,,1,0,0,,,
S1L033626705,3,90667630,+,GCAGACAGAAAAAGAGGCAGCTGTCACAGTGTGTTTCTAGTCAGGAATCA,,G,A,2,,DBA/1LacJ,substrain,DBA/1LacJ,1,A,,,1,0,0,,,
gUNC5751400,3,91012127,-,ATCAGATAAGGGAGTAATATCCAATAACTACAAAGAACTCAAGAAGCTGG,,C,T,4,rs246601563,,,,0,,,,1,0,0,,,
DFR033665503,3,91637577,-,TACCGGGTCTTAAGACTTTGTTTTGAGTTGAAGCAGGTTGGACATCATCC,,G,T,2,,FVB/NRj,substrain,FVB/NRj,0,,,,1,0,0,SPIKE,,
gUNC5752814,3,91712006,+,GTTAAGAAAACACCTGCACCAGACATATTCTAAAATGTTCTTAACCATTC,,G,A,4,rs234276732,,,,0,,,,1,0,0,,,
gJAX00529985,3,91863260,+,TGACAAAATCACTCTGCATTACATGCTAAATTTTGGGAAATTGACTTTTA,,C,A,1,rs50751100,,,,0,,,,1,0,0,,,
UNC5755533,3,92143504,+,AGAGGTTTTTTTCTGGCTTTGTCATAGGCCTAATCAGGGAAGTTTATAGT,,C,T,1,rs254815531,,,,0,,,,1,0,0,,,
B10030092160,3,92160875,+,CAAGTCCTGTCTTACCAATACTCTGAGCTTTGCCAGATGCTGTATACTTA,,C,T,2,,C57BL/10,strain group,"C57BL/10ScCr, C57BL/10ScNHsd",0,T,,,1,0,0,,,
UNC5762510,3,92811235,+,AAGGGTAAAAAGATTATAAAACCCAGAGTACCAAGAAGTTTGCTGTATGA,,C,T,1,rs256258064,,,,0,,,,1,0,0,,,
mUNC030144412,3,92877472,-,CTTTCCTCAGAGGAGACCTGAGGGACCCCAGGAACTTTCAGTTCCACCTG,,C,T,1,rs108637181,,,,0,,,,1,0,0,,,
UNC5763699,3,92921114,-,CTCCAAGACAGCAGCAGCCCACTGATTTGTGCCCACAGGCAGAATCCCCA,,C,A,1,rs235608588,,,,0,,,,1,0,0,,,
SAC033726218,3,93155465,+,CACAATCCAGATCACAGGTGTTACTGAGAAGCACTGGTCTCAGGACACTC,,G,A,1,rs33024752,,,,0,,,,1,0,0,,,
gUNCHS009419,3,93532376,+,TGACTTCCTTCAGTGATGAACCATGATCTAGAAGTGTAAGCCAAATAAAC,,T,C,4,rs6174585,,,,0,,,,1,0,0,,,
UNC5770722,3,93568457,-,CTAGGGAAATCTGCTAAGAACACACTGCTTTGACTTTCTCCAAGTCTTCA,,G,T,1,rs33039506,,,,0,,,,1,0,0,,,
gcr15snv50,3,93679674,+,ACTATCACAAGCAATCTACAGATACAATGCAATTTCCACCAAAATCCAAT,,T,G,3,,,,,0,,,,1,0,0,,,
SNT033758991,3,93974794,-,CACTTGTACCTGTGTGTCTTTTAGAAAGACATTGGTGGAGTCTGTATCCC,,A,C,3,rs1132983617,,,,0,,,,1,0,0,,,
gUNC5773934,3,94461036,+,CAACAAATCTGCAATTGCTAACAAGGTTTATATTTGAGCTGAATGCTGTG,,A,G,1,rs31693562,,,,0,,,,1,0,0,,,
UNC5773934,3,94461036,-,TCCTGTTCTTCCCATCTCAGCCCCCTGAATATTAGGATTACAGGTCTATA,,A,G,1,rs31693562,,,,0,,,,1,0,0,,,
S3J033792257,3,94806426,-,TGATCATCTTGCTGAGTGGTCAGAGTGAGACTCCTTCTGTACCAGCCCTG,,A,G,1,rs254720513,C3H/HeJ,substrain,C3H/HeJ,0,G,,,1,0,0,,,
SS6033794184,3,94854607,-,ACATGCTACAGCACAGAAAAGAGGAATACCAATGCCATAAAAAGGCAGCC,,A,G,1,rs33087570,,,,0,,,,1,0,0,,,
SS6033805728,3,95143203,-,TGACTCCAGTCTCTGGAAGCCCCCAAATCAGTTTTTAAATCCCTGAATCC,,A,G,1,rs31187852,,,,0,,,,1,0,0,,,
JAX00110594,3,95337641,+,CCTAAAATGTGAGAAATACCAAAGGCTCTAACCTCCAGGGCCATGCTGAA,,T,C,1,rs31239202,,,,0,,,,1,0,0,,,
SFR033819403,3,95485093,+,TTACCAGTGTTGAGGTTACATGGCTAATTCCAGAGATGACCAAAATATAG,,C,A,2,,FVB/NRj,substrain,FVB/NRj,0,A,,,1,0,0,,,
UNC5787203,3,95941154,-,AAAACCAGATGTAGTTGTAGCAGTGGTGCCAGCCCTGTCTACAGAGTCCC,,C,T,1,rs31388422,,,,0,,,,1,0,0,,,
UNC5787323,3,95953161,+,GTATCCTTTTCTTAAGTTAGGCTTCAGTGCACTGGCCCCAGGATTCAAGG,,A,G,1,rs31694771,,,,0,,,,1,0,0,,,
SS6033839129,3,95978244,-,AAACATTGCCTTCATGCTGCCACCAAAGCATGGTGTTAGGGGCCAGAGGG,,T,C,1,rs30204904,,,,0,,,,1,0,0,,,
gUNC5787965,3,96025142,-,TCATAGACTCTTGTTGCAATCACTGCTTTTGTTCCTATAAAAGCCTTTTT,,A,G,1,rs31486542,,,,0,,,,1,0,0,,,
UNC5789300,3,96214746,-,GTACATAACAGTTTCTTCCATGATTGATACATTCCATCTGCAGGGAAACT,,G,T,1,rs31479352,,,,0,,,,1,0,0,,,
backupUNC030495445,3,96410639,-,CCAAACCATGGGTGGCTCTATCTCTCAAAGGTGAAGCAAGTACTTAGAGT,,A,G,1,rs31424625,,,,0,,,,1,0,0,,,
gUNC5794598,3,96852349,-,GTCTCAGGAGGCTAGGGCTTAGATACCAGCTTCAGCAACAATATGGGGTT,,T,C,1,rs30113432,,,,0,,,,1,0,0,,,
B10030096928,3,96928469,-,TGCTGCACCCTTAAGTTGTGCTTGGTTGAGTAAACACAAATAATTGTATC,,C,T,1,,C57BL/10,strain group,"C57BL/10ScSnJ, C57BL/10SnJ",0,T,,,1,0,0,,,
mUNC5799631,3,97320969,+,TGTGAAGCACCAGCTTTGAAATATTTTATCATTTCTGGTTTTTCATATAC,,C,T,1,rs31139405,,,,0,,,,1,0,0,,,
SFT033893264,3,97331600,+,CTCTGTTCCTTTAGCGCTCGCTGGGGATCTTCAAACTGACCATGCACACA,,A,G,1,rs31474998,,,,0,,,,1,0,0,,,
UNC5800029,3,97345768,+,CTTGGAGCAACCAGATCTTGGGGTGCAAAGTCTAGCATTTGCATACAGCA,,A,G,1,rs31434583,,,,0,,,,1,0,0,,,
UNC5807613,3,97846230,+,AGATGAACAGAGTGGCTAAAGGTTTTTAATTGCTGCTGGCCACTGTTTGG,,G,A,1,rs249263262,,,,0,,,,1,0,0,,,
DFC033922780,3,98069503,-,ATGAGGAAGGCATGAAACTGGGGAACTAAGACAACATGCTCAGAAGAATT,,C,A,1,,FVB/NCrl,substrain,FVB/NCrl,0,A,,,1,0,0,SPIKE,,
mUNC030674885,3,98356755,+,AAGGTTTTATAAGCAATAAACTTTTATGAGGAAGAGGAAAAAGGAGTCTT,,T,C,1,rs30840845,,,,0,,,,1,0,0,,,
mbackuprs48296073,3,98783743,-,TAGTCTTTGAGAGACTTATTGCAGGTTGTAAGAGAGAATGAACAGAACAC,,A,G,3,rs47398484,,,,0,,,,1,0,0,,,
SS6033958078,3,98951964,-,TGAACCATGGCCACTTTTTCTTATGACCTGTCTTACACATCTGTCAAACC,,C,A,1,rs30910754,,,,0,,,,1,0,0,,,
S6R033964247,3,99106176,-,CCATATAAACACAAATTGAGAGCTAGTGTATAGGAAATCCAAGCTATACA,,C,T,1,rs33211608,,,,0,,,,1,0,0,,,
UNC031303497,3,99198356,-,TGTTTGGAGATCTGATTTTAATTAAAAGAACATACTATCAGTGCAACTCC,,A,G,1,rs252506458,,,,0,,,,1,0,0,,,
S6Y033972444,3,99311108,-,TATGGTTAAATTTAAATCAACTTTTCTGTCTTCTAAATCCATTAATCGTA,,C,T,1,rs30208255,,,,0,,,,1,0,0,,,
gUNC5826374,3,99469939,+,AGAAATTTAAATTCAGTTACCCCACATGGAAGACACTACTTCTCCCCCAA,,T,C,1,rs236849897,,,,0,,,,1,0,0,,,
UNC5831385,3,99879041,+,GTGTAATATCCTCCATATGTTTTAGACTTTAGCTATGGAAGAAGTGTAGC,,T,C,1,rs33301846,,,,0,,,,1,0,0,,,
gJAX00531626,3,99967847,+,AGAATGATGCCCAATTCAGAGCCATTTGTTATGATCACTACTAGGAATGA,,G,A,1,,,,,0,,,,1,0,0,,,
SS6034009134,3,100228352,+,CCCTTACCTCCAAACAATTCAGAACACATGTCACCAAGGGCCTCTTTGCC,,T,C,1,rs33340769,,,,0,,,,1,0,0,,,
SS6034009593,3,100239837,+,TGGACTTGACTTCTGGTAAGAGACTAGAGTACAAAGAGAAGACTGCAATT,,T,C,1,rs30854546,,,,0,,,,1,0,0,,,
gUNC5836999,3,100357402,-,TCTGGCTGGAAGTAAAGAAAGCTTATCTAGGTAACAGTTCCTGGAGGGGC,,G,A,1,,,,,0,,,,1,0,0,,,
UNC5837234,3,100381256,+,TATATCACACCAGCTACAATCTTCCCACAACCAAGGTCTTATCCAAAGCA,,A,G,1,,,,,0,,,,1,0,0,,,
UNC5839164,3,100518251,-,CTGACATTCTCCACATGGTGGGCTCTCCCTGGGTCCTCCTGTTAGGCTTC,,T,C,1,rs3159590,,,,0,,,,1,0,0,,,
JAX00110978,3,100561822,+,CCAGGTACTCCCACCTACACAGACTACAGCATGAAAGCAAAGCAAGTTAT,,G,A,1,,,,,0,,,,1,0,0,,,
backupUNC030498753,3,100692862,+,GCATAGCAGGAGAGGGAAAAAGTATGCTAACACAAACCAGAAAAAAGCAA,,A,G,1,,,,,0,,,,1,0,0,,,
JAX00110988,3,100719391,+,TCAATTCCCATTTATCAAACACTCTCTGTGTGTATGCAGCCTGGGAAGAA,,C,T,1,,,,,0,,,,1,0,0,,,
UNC5841910,3,100755983,+,GCACCCTCTCTGAAGAAAGCCCTAGAGTGGGGCATGACATCACCCTCCCA,,T,C,1,,,,,0,,,,1,0,0,,,
S1L034043179,3,101079478,+,GCCTGTCCTATATTCTTCATGGGACGCAGATAATTGAATGTGTGAGCAAA,,T,C,1,,,,,0,,,,1,0,0,,,
UNC5847715,3,101097858,+,CAGGGGTGACCCTGGCAGTGACACCAAAGAGCAAAGCAGCACACCTGCCT,,T,C,1,,,,,0,,,,1,0,0,,,
UNC5848474,3,101154169,-,AGATTCCAGAAAGGTCCTGAGTCAGTCAAAGTTTCTGAATGGAGTACCCA,,C,T,1,,,,,0,,,,1,0,0,,,
gUNC5849679,3,101223431,+,GCTGATGCAGAGGTCAGAGAAGGGTGCTTCTGACTGGCTTGCTTCCCATG,,T,G,4,,,,,0,,,,1,0,0,,,
DFT034060297,3,101507429,+,CAGGCAGCTTTTCTGAAACCAAGACCCAAGCACAGGATTCTTTGCTCTGC,,G,A,1,,FVB/NTac,substrain,FVB/NTac,0,A,,,1,0,0,SPIKE,,
gUNC5855250,3,101611671,+,AACCAGCAGCCACATCATGCCAGGCAGGCATCTTGCTTGGGGCTGGAGCT,,T,G,1,rs31602924,,,,0,,,,1,0,0,,,
UNC5855250,3,101611671,+,AACCAGCAGCCACATCATGCCAGGCAGGCATCTTGCTTGGGGCTGGAGCT,,T,G,1,rs31602924,,,,0,,,,1,0,0,,,
UNC5855546,3,101629281,-,TATCACAGCAATAAGAAAGTGCCTAAGACTGAACCAAGCCATTCAATGTG,,A,C,1,rs31179533,,,,0,,,,1,0,0,,,
UNC5856401,3,101683365,+,CTGTCACCCAGCAAGTTCTCAAATTTGTTGAAGACTTGTGCACATGCAAT,,G,T,1,rs31087202,,,,0,,,,1,0,0,,,
UNC5864433,3,102207861,-,GACTGGAGTTAGTTTCCCAGCTATAGCTCCAGCTCTGAGAAATCTAACAC,,A,G,1,rs238249139,,,,0,,,,1,0,0,,,
UNC5865708,3,102277918,-,TCGCTCTGATGGAGGAGAACCGACTAAGTAACAGCAGCCTGGAACCTAGA,,T,C,1,rs30950194,,,,0,,,,1,0,0,,,
gJAX00532246,3,102281030,+,CTATGCTGCTTTGAGTTTCAAACTTAGAGCCCTGTGATACCCAAATATGC,,C,T,1,rs38017877,,,,0,,,,1,0,0,,,
S6J034107260,3,102681519,-,TAGCCTAGGTTACATACGATAGAATAACATTGGAGACACATTTCATTTCT,,T,C,1,rs30501465,C57BL/6J,substrain,C57BL/6J,0,T,,,1,0,0,,E2,E3
gUNC5873691,3,102939906,+,AAATAAAACAGACTCAGACTGGAATCAAATGTTTTCTTGCAGATGGCCTA,,G,A,1,rs50486379,,,,0,,,,1,0,0,,,
S6J034128520,3,103213011,+,TGCATGTGCCCAAAGAGAAGGAGCATGAGTGCATCAGATCCCCCTATCCT,,A,G,1,rs46877382,C57BL/6J,substrain,C57BL/6J,0,A,,,1,0,0,,E2,E3
SS6034129263,3,103231591,-,AGATCTCATAGTTAAAGTTCCATATGTATTTACCTTTATTTTGTGGGTTT,,G,A,1,rs47101287,,,,0,,,,1,0,0,,,
B10030103478,3,103478031,+,AATCGAACACAAAGTGGCTTACCATAATGGATGGAGGACACCCCCCCCCC,,C,A,3,,,,,0,,,,1,0,0,,,
SFT034144880,3,103622020,+,TAACAGAAAAGAGGAAAGATGGTGATGGTGGCCCAGCTGAAAACCTCTGG,,G,T,1,,,,,0,,,,1,0,0,,,
gUNC5883020,3,103721586,+,GATTAGGAGAAACACTCCTAAAAGTAACAAAGCAATTGGGTACATGGCTG,,A,G,1,,,,,0,,,,1,0,0,,,
gUNC5885627,3,104023600,+,CCTTTTTTTGATATTCAGAGCTGGGAGCAATGTGGGAAGCAGACAGGTAA,,G,A,1,,,,,0,,,,1,0,0,,,
backupUNC030163295,3,104320698,+,GTGCACTTAGATTCTGGGATGGAAGCCAAGACAGTGGTGGAAGATGGCCA,,C,T,1,rs30940616,,,,0,,,,1,0,0,,,
SSH034177380,3,104434521,+,AAGATACACAGATAGTCAACAATCACAGGGTTGTCATCCATCACCAGGGG,,G,A,1,rs263662035,,,,0,,,,1,0,0,,,
JAX00111268,3,104444403,-,AATGCAATGTGTGTTGAGACTACCAGTGGGCATCATTTCTGACTGAAGAT,,G,A,1,rs30842075,,,,0,,,,1,0,0,,,
gUNC5891868,3,104852789,+,TTGTGTAAACGTATGTGGTTATATGCTCATGAGTGTCTACATAGTCTAGA,,C,T,1,rs45771026,,,,0,,,,1,0,0,,,
mUNC030504743,3,105424619,-,CTTCTCCGGGCACAAAGCATTGAGTGTATGTGACTATGGTAGGGCACACA,,A,G,1,rs33625569,,,,0,,,,1,0,0,,,
SBJ034218063,3,105451590,+,TCCTGAACGACAGTGGCTCTTACGCGGAGATAAAGGCAGTTTGTCTTCCG,,T,C,1,rs252737420,BALB/cJ,substrain,BALB/cJ,0,C,,,1,0,0,,,
S6J034218983,3,105474591,+,ATAAGGAGCTCAATGATGGCCACTAGCTCTTCTAGCCTATCTTGTGACCC,,C,T,1,rs3715318,C57BL/6J,substrain,C57BL/6J,0,C,,,1,0,0,,E2,E3
gUNCHS009717,3,105748158,+,TCCTCCTTCTCCCTCATGTCATATCTTCTTTTCCACTGGATCACTGCTTC,,T,C,1,rs33658436,,,,0,,,,1,0,0,,,
UNC030165183,3,106043586,+,AACATGTTTTGAATACTCTGCTCACATTTGTTCCTTGAAATGACTTGAAA,,G,T,1,rs31095074,C57BL/6J,substrain,C57BL/6J,0,G,,,1,0,0,,E2,E3
S3H034252295,3,106307394,-,AGCTTCATCACATCCTCCCAAATGCCTCATAGAATATTGAAAATACAGTC,,A,G,3,,,,,0,,,,1,0,0,,,
mbackupUNC031344859,3,106482730,+,CGAGCCAGCCTGAGACTGAAACGCGGCCAGCGGGGTTAGTGCGGGCCACA,,A,G,1,rs260277886,,,,0,,,,1,0,0,,,
S6T034284628,3,107115704,-,TGGATGCACTTAACCCTGAGAGGCAAGAAGCCACATGTGCCTCACCTCTC,,A,G,1,rs29977450,,,,0,,,,1,0,0,,,
mUNC030678789,3,107189642,+,TAGAAGTCACACCAGCAAACATAACAATGGAAGCTGCTCCAAATGTCCTC,,G,A,1,rs33745832,,,,0,,,,1,0,0,,,
S1H034297299,3,107432481,-,GCCCCAGCTTGGCTTTACCCTTAGCTCTTCCTCTCTGTTCTCTCTTCCAC,,C,T,1,rs30359518,,,,0,,,,1,0,0,,,
S6J034303255,3,107581375,-,GTCCCCTTTGTCCCAGGCTGCCAGGCCCTTGAAACAGGGTGAACAGGCTC,,A,C,1,rs49331364,,,,0,,,,1,0,0,,,
SBH034311670,3,107791761,-,AAGACAGAGTGTGTTTGCTCTGAGAACTGGATCAGAAACCTCAACTTCAG,,G,A,1,,BALB/cAnNHsd,substrain,BALB/cAnNHsd,0,A,,,1,0,0,,,
gUNC5923673,3,107998865,-,GAAGAGTTTCACTGAGCAGCCCTGTTCTGGGCCTTGTTATCTCTTCTGGC,,G,A,1,rs29596505,,,,0,,,,1,0,0,,,
gUNC5924294,3,108045878,+,ATACATCTTGAAGTCCCTTAAGCTTGCTATTCTACTATGTACTCTGTCTG,,T,C,1,rs212739634,,,,0,,,,1,0,0,,,
S3T034322875,3,108071887,+,GCTTGGTAAAACTGGTAGCAAGGAGAGGCTTTTTGCTTCCTATTTTCTTA,,A,G,1,,C3H/HeNTac,substrain,C3H/HeNTac,0,G,,,1,0,0,,,
S3J034338860,3,108471519,-,GTAAGTCAGTTGCCAGAATAAGCAAAGAAAGGTCTGGATACCTTGAAGGA,,G,A,1,,C3H/He,strain group,"C3H/HeNCrl, C3H/HeNHsd, C3H/HeNRj, C3H/HeNTac",0,A,,,1,0,0,,,
gUNC5933912,3,108888517,-,CGGGGGCAAACCTGGGCTGCAGGAAAATCTGCCCCCCAAAATCAAAAAAT,,C,A,1,rs229374674,,,,0,,,,1,0,0,,,
DFH034358998,3,108974971,+,TTAAAAACAGAGCCCAGACCTATTGAGCACCCCCAACTTAGATATGTACC,TTAAAAACAGAGCCCAGACCTATTGAGCACCCCCAACTTAGATATGTACG,G,C,1,,FVB/NHsd,substrain,FVB/NHsd,0,C,,,1,0,0,SPIKE,,
SBJ034360732,3,109018303,+,AATGGGTATAAGTGAGACCCTCAGAGAACTCATAAAGGAAGTCAGAGACC,,C,T,1,rs262408865,,,,0,,,,1,0,0,,,
gUNC5945004,3,109648178,+,AGTAGAGAACAAAAAGCTCACAAATTCTTCAGCCAGGTCTCTGAATACAT,,T,G,1,,,,,0,,,,1,0,0,,,
gUNC5949179,3,109979444,+,GGATGCAGAGAGAGAAAAGAAGAGCAGACTTTCTTTGAATGCAAAGAAAC,,C,T,1,rs8256684,,,,0,,,,1,0,0,,,
mUNC5954963,3,110516355,+,CTCTCAACTCAAAGACTGCCTTAAATTTCCTCTTTGTATCAATTTCCCAG,,G,T,1,rs29852006,,,,0,,,,1,0,0,,,
DSB034447196,3,111179921,+,GCATATAGACTAGGTTCATCCCTGAACTGTCTTCAGGTAACCATTCAACA,,G,A,1,,,,,0,,,,1,0,0,SPIKE,,
SFT034447601,3,111190049,+,TGTTTAGAAAAGCATGCCCAATTCGGACAAATATTTAGTTTCCTGGAAAG,,A,G,1,rs48083570,,,,0,,,,1,0,0,,,
gICR1410,3,111296963,-,ATTCAGATTATACATTCCACATTGCTGTTAATCACCAAAGGATGTCAGAA,,G,A,4,rs30953608,,,,0,,,,1,0,0,,,
S6Y034457284,3,111432115,+,TAAGAAGAATTGCATACAGATGAGCTAAATATTGTGATAATCTTATGGTT,,G,A,1,,,,,0,,,,1,0,0,,,
SAH034461785,3,111544644,+,ACTGTAAAGATAAGCCTGAGTTTCTGCTTAACAATTTCTATACCCATCAA,,C,T,1,rs31383809,,,,0,,,,1,0,0,,,
gICR1414,3,111776150,-,AGGATGATTGCTTTGTGCTTCATGATTTAACATGATTTTTGGACTCACTT,,G,A,1,rs29983084,,,,0,,,,1,0,0,,,
B10030112294,3,112294459,+,TCACAGTTCAGTGAAATTGTTTGTCTTTGATTGTAGAAGAGGACAGTGAT,,C,T,4,rs1134511884,,,,0,,,,1,0,0,,,
SNT034492275,3,112306877,+,TTTAAGCAGTGACCACTGTGTTGCTAACAAAATCACACATTATACTGCTG,,T,C,1,,NOD/MrkTac,substrain,NOD/MrkTac,0,C,,,1,0,0,,,
gUNC5981062,3,112488501,+,ATTTGGTAATGAGCAAAGTGCTGACCTTCTAAGGCTCGGTCTTAACATGG,,T,C,1,rs30565839,,,,0,,,,1,0,0,,,
S2J034517619,3,112940484,+,CCAGAGTTCTGATTATAGAAAGAAGCACTTCAAAGTTGTATCATATACAT,,C,A,1,rs51516878,DBA/2J,substrain,DBA/2J,0,A,,,1,0,0,,E2,Consensus
SS1034523237,3,113080942,+,AAGTTCAGCTATGTCTCATATCTGAGACAACATTGCCCCCGTGTGGCCAA,,A,G,1,rs36883342,129S1/SvImJ,substrain,129S1/SvImJ,0,G,,,1,0,0,,CC,CC
DS4034553277,3,113831944,-,GTGTACCTCTAGTGAATTAACTCTCTTTCCGTGGCTTTCTTGCCTCCAAA,,C,A,2,,129S4/SvJaeJ,substrain,129S4/SvJaeJ,0,A,,,1,0,0,SPIKE,,
S3J034578441,3,114461026,+,TACACGTGCATATGAAATATTTACATTAAACAGTTGTTCTATTTACTTTT,,C,A,1,rs245041217,C3H/HeJ,substrain,C3H/HeJ,0,A,,,1,0,0,,,
gUNC6002742,3,114581460,+,TCAGTTTCTCTAGTGAGCAAGAGCTAAAACATCTATCCTTAGATTTTAAT,,T,G,1,rs30459429,,,,0,,,,1,0,0,,,
mUNC030513682,3,114695438,+,AAAAATTTCAGGTCAATAATATGTGATATAAAATTCCAGCCAATTGACTG,,T,C,1,rs261683370,,,,0,,,,1,0,0,,,
S6H034612717,3,115317942,-,CAATAAATTCCTCTTGTTTTTGCATTGGTCCTTGGCTCCCCATTGTTCAC,,C,A,3,rs46572479,,,,0,,,,1,0,0,,,
SS6034626342,3,115658553,+,GACCTGGCTTTGAAACAATGGCAGTCTTACAGGATATAGTAACCACTCAG,,T,C,1,rs30076835,,,,0,,,,1,0,0,,,
SS6034626385,3,115659649,+,ACTCTGAAAACAGACACCCTTTGGAAGAGGAAAGAATGACACTAAACAGT,,A,C,1,rs30079293,,,,0,,,,1,0,0,,,
SBJ034626667,3,115666676,-,AAAGGCTTTGTCCTTGTTTTATCTCCGTTATTGTGATAAAATACCCAGGC,,C,T,1,rs213386230,BALB/cJ,substrain,BALB/cJ,0,T,,,1,0,0,,,
gUNC6019002,3,115670751,-,TTAAACTTGGGGCCTTGTGCAAGGGGAATACAGTCTCTACCACTGAGCTA,,A,G,1,rs51769724,,,,0,,,,1,0,0,,,
SAJ034633571,3,115839277,+,TGTTTTTAACTACATTCACTGAGGTCTTAAAAATATCTTTGCTATTATTC,,T,C,1,rs46913158,A/J,substrain,A/J,0,C,,,1,0,0,,CC,CC
gJAX00112120,3,116142888,+,ACAGATCCTGAGTGGTCCCTGTATTTTGACTTCAGCATCCTTTGAAGTGA,,G,A,1,rs50169458,,,,0,,,,1,0,0,,,
SS1034648356,3,116208901,+,AGGCAAATGCTTTGATTCTGTTGTTATGGCTTATTTATTGTATTTTGGTT,,T,G,1,rs585402010,129S1/SvImJ,substrain,129S1/SvImJ,0,G,,,1,0,0,,CC,CC
gUNC6032774,3,116568434,+,TTCAAAATCACAAATAATTACACCCCCCTCTTGTCTTTCTTCCCTTCAGC,,T,C,1,rs30505740,,,,0,,,,1,0,0,,,
UNCHS009891,3,116665362,-,TCTGAGTGCTAGGATTAAAGGCGTGAGCCAGCACACCCGGCCTTTGTATC,,A,G,1,rs31140589,,,,0,,,,1,0,0,,,
UNC6038671,3,116932415,-,ACATCAGTCAAGACATCTTTGACCTCCAGATTTCAAGGGATGGGGCAGGA,,T,C,1,rs51534360,A,strain group,"A/J, A/JCr, A/JOlaHsd",0,C,,,1,0,0,,,
S2J034678184,3,116954620,+,ATTGCTTTGTAAAATCTTTATAAACAGTACTTTTGGGAAAAAAGAACTAG,,G,A,1,rs214683596,DBA/2J,substrain,DBA/2J,0,A,,,1,0,0,,E2,Consensus
gbackupUNC030187275,3,117487795,+,TCATTTAATTAGCTAGGCAAAGGAGAAGGCAATGGTTTGGCTCTTGCCTG,,T,C,1,rs37586980,,,,0,,,,1,0,0,,,
D6Y034712373,3,117809329,+,ATCGTCTTCTGCTCATTGTGGCATAAGATTTGTGCCACAAATACAGTGCA,,G,A,2,,B6N-Tyr<c-Brd>/BrdCrCrl,substrain,B6N-Tyr<c-Brd>/BrdCrCrl,1,A,,,1,0,0,SPIKE,,
gJAX00112248,3,117862493,+,TTGGTTCAGAAATACACCTTGGCAGCTTCGCAGGCTCTACCTTAATACAG,,C,A,1,rs30752620,,,,0,,,,1,0,0,,,
DT2021309135,3,118225573,-,GCGCACCAGAACAGGGCTTGATCTGGCCTGCTAAACCCACCCTAGAACTC,,G,T,1,,129T2/SvEmsJ,substrain,129T2/SvEmsJ,0,T,,,1,0,0,SPIKE,,
B10030118466,3,118466667,-,TCATAGCTTGGGAACAATGAAAATTCAAAGAATGTGTCCTCCCAGATACA,,C,T,1,,C57BL/10,strain group,"C57BL/10ScCr, C57BL/10ScNHsd",0,T,,,1,0,0,,,
gJAX00112340,3,119079444,-,CAAGGCACAGGCACAGACTTACATTCAACTCAATTACCTGTCTATACAAG,,A,G,2,rs30145011,,,,0,,,,1,0,0,,,
mUNC030523155,3,119975991,-,TAGGTCTGGACAGGCTCATGGCCCTTTAGAGATAAGGTTTCCTTCCATAC,,C,T,1,rs31449219,,,,0,,,,1,0,0,,,
gUNC6086937,3,120467755,-,CAGGACCCCATTCAAAGGACATCATCTACAGTGTTTAGTCATAGTGGAAT,,C,T,1,rs37647793,,,,0,,,,1,0,0,,,
B6_03-120369799-S,3,120666881,+,TTCTGCAGAAAAATACTGTAAGCTCATTGACACTTGAGGGAAACATTGAC,,A,C,1,rs30505345,C57BL/6J,substrain,"C57BL/6J, C57BL/6JEiJ",0,A,,,1,0,0,,E2,E3
mB6_03-120369799-S,3,120666881,+,TTCTGCAGAAAAATACTGTAAGCTCATTGACACTTGAGGGAAACATTGAC,,A,C,1,rs30505345,C57BL/6J,substrain,"C57BL/6J, C57BL/6JEiJ",0,A,,,1,0,0,,E2,E3
DSR034827192,3,120679808,+,TTAGCACTCAGATACACTGTGTCAAAATGTGTCTGTGTAGGGAGACGGAC,,G,A,2,,129S2/SvPasOrlRj,substrain,129S2/SvPasOrlRj,0,A,,,1,0,0,SPIKE,,
S2J034831095,3,120777386,+,TACTCTGGATATTCAGAGGCATATTGCTTTCCTGCACTGCCTCTCCTCAC,,C,T,2,rs31144014,DBA/2J,substrain,DBA/2J,0,T,,,1,0,0,,E2,Consensus
gUNC6098776,3,121367244,-,ACACTCCTGTGACCCAGATCTTGTGATGACACATGCCTTTAGTCCAGATC,,A,G,1,rs241042528,,,,0,,,,1,0,0,,,
UNC6102149,3,121553544,-,TTCCCTAAAACCTCAGGAAAATCCACAGTCGCCTGGCAGCTTGGCTGAGG,,G,A,1,rs262787792,129S1/SvImJ,substrain,129S1/SvImJ,1,A,,,1,0,0,,Consensus,Not Fixed
gUNC6106313,3,121826501,+,TGTCAGGAAAATGTACGACTTCACTTTTTGGTTCTGAACAGTACCGGGTG,,G,T,1,rs31602610,,,,0,,,,1,0,0,,,
UNC030194728,3,121828392,-,TCTGTGCAACAGTTCTGCTCCTTGATAGAGTTTGACTCACCAATTTTAGC,,C,T,1,rs45990424,C57BL/6J,substrain,C57BL/6J,0,C,,,1,0,0,,E2,E3
gUNC6114888,3,122412166,-,GTTTTTCTAGGCTGTTTGATTCCTCCCCACAATGAATACCAATTGCTCTC,,G,T,1,rs50458049,,,,0,,,,1,0,0,,,
B10030122861,3,122861895,+,GAGTTCTTTGTTAAGACATTGACTCTAGCTGGGGAAGCACTTCCGGGTCG,,C,T,1,,,,,0,,,,1,0,0,,,
S2C034919645,3,122991146,-,AACCTTTGGGAAACAACCAGGAGCAACAAAAATAACCTATATTGTTTGGG,,T,G,1,,DBA/2NCrl,substrain,DBA/2NCrl,0,G,,,1,0,0,,,
S3C034928154,3,123203856,-,TAACCCAACAGGACTTGACTATTTGGATACTTACTTTAAGTGAGAATAAG,,C,T,1,rs37163695,,,,0,,,,1,0,0,,,
S3C034928156,3,123203918,+,TTAAAGTAAGTATCCAAATAGTCAAGTCCTGTTGGGTTAAGTGTTCAGTA,,C,T,1,rs47277016,,,,0,,,,1,0,0,,,
mUNC6132276,3,123520014,+,AGAATGCAAAGGCATCTTGCATTAAGGACAGTAAGCCATTTTCATTGTGC,,T,C,1,rs46998114,,,,0,,,,1,0,0,,,
SBC034941050,3,123526257,-,CTTGTCATTCACATTGAATGAAAACTACTGGGAACATTTTTTTCTCTGGG,,A,C,1,rs30754232,,,,0,,,,1,0,0,,,
SAH034955442,3,123886059,+,CTATTTATTACTGTCTGAGGGCTCTCTTAAATAGCATAATCAACAAAAAC,,A,G,1,rs263218494,,,,0,,,,1,0,0,,,
D6T034963027,3,124075675,+,ACCAACTCTAACTGCAGAGTTATATGGCTAGATCTCAGAGCTAGTTTTGG,,G,A,1,,C57BL/6JBomTac,substrain,C57BL/6JBomTac,0,A,,,1,0,0,SPIKE,,
mUNC6143652,3,124173528,+,CTGGTGACATTGTGTGGAAGGAGCCCACTCATTCACTGTTGATGGGATGA,,A,C,1,rs46903889,,,,0,,,,1,0,0,,,
gUNC6145754,3,124331384,-,GATTGATTGTTATGGTCTTATCAGTGGGCTGTCAGGATTATGTGTTCCAG,,G,T,4,rs51513148,,,,0,,,,1,0,0,,,
SAJ034982318,3,124557953,-,AACCCAAATGTAAAGAAACATTGCCAAGTTTCTTTCTAACCTGCTCACTG,,C,T,1,rs30327658,,,,0,,,,1,0,0,,,
SAC034985723,3,124643085,-,ATGGGGAGAATATTGAATTGTGAGGAGATGACATCTAGTAGAGGTAACTC,,C,T,1,rs263469988,,,,0,,,,1,0,0,,,
gJAX00536654,3,125068773,-,CAGAGTGCTATATTGGATACTTTTCATGTACTGCACATTTTCACTCAAAC,,A,G,1,rs30370047,,,,0,,,,1,0,0,,,
gUNC6167562,3,125598333,+,TATGTGCAAAGGGCCTAGGTCCATCTCATGTCTGCTCTCACGTTGGCAGT,,T,G,1,rs30911065,,,,0,,,,1,0,0,,,
gJAX00536840,3,126305153,-,GCGGATAGCCATAGCTATCTGACAAGGAAGAGTAGTCATATTGGCAAGAG,,A,C,1,rs30470654,,,,0,,,,1,0,0,,,
SBB035061110,3,126527767,-,CAGGGGTACCTAGCAGTCAGCAGGTTGGGAGAGGGTCTTACTTGGTTATC,,G,T,1,rs30501820,BALB/c,strain group,"BALB/cByJ, BALB/cByJRj",0,T,,,1,0,0,,,
gUNC6185684,3,126773625,+,TGGTTTCTCCTCCTATCTCTCTGATCTTCAGAAAGGATGGAGATGGACTT,,C,T,1,rs30528728,,,,0,,,,1,0,0,,,
S3N035096150,3,127403753,-,AAGAAGACACACCAACCTTTTGAGAACGTAGATACAGGCTGGAGTGATGG,,G,A,1,rs30933905,,,,0,,,,1,0,0,,,
SBT035101462,3,127536560,+,CAATGCTTTTAAAATTCAACATCTTAATAAGAAACGTTTGGCACAGTCTG,,T,C,1,rs52432900,,,,0,,,,1,0,0,,,
gUNCJPD009141,3,127626711,-,ATGTCAAGGACTAGACCAGCCCAGAGAATCTTTGGGGTGTGCAACATGGG,,G,A,1,rs48303878,,,,0,,,,1,0,0,,,
SBC035107913,3,127697829,-,TAGTGATCCTCAGCCTTTCCATCACTACTTTCATATAGTTTATGTCTCGG,,A,G,1,rs231081709,,,,0,,,,1,0,0,,,
UNC6208306,3,128154139,-,GAGGGTAATAAATTCCTGATATATATGTATCAGATCTGCCACAAAGAAAT,,C,T,1,rs36671438,,,,0,,,,1,0,0,,,
UNC6209486,3,128224356,-,CAGTAAGACTGTGCCTTTAGGAGATAGAAATAGATCTTTCATATGATTCA,,C,T,1,rs51624063,,,,0,,,,1,0,0,,,
gUNC6210217,3,128264945,-,CATTCTATAAGAAAGCAAGCTGAGCAAACCAGGGGAAGCAAGCCAGCAAG,,A,G,3,rs30066644,,,,0,,,,1,0,0,,,
B10030128455,3,128455707,+,ACTAAATATGCAAATTAAAGCGAACCAGAGCCCCTAAAACTGTAGTGACT,,C,T,1,,C57BL/10,strain group,"C57BL/10ScCr, C57BL/10ScNHsd",0,T,,,1,0,0,,,
gUNC6215314,3,128630527,-,GTAAAGAGTAGATGAACATGCAGGCAAGAGTGAGGGCAATCAGGCAAAGG,,A,G,1,rs50966216,,,,0,,,,1,0,0,,,
JAX00537340,3,128988164,+,CAGAAAAACAAGCTTCTTCTTGACATCACAAGGCTCACTCTCATGAGCCC,,G,A,1,rs50826833,,,,0,,,,1,0,0,,,
UNC6219668,3,129002031,+,ATGAAACCATTAGAAGAAGAAGAAATCACTTTTCATATAGGAGCAATTCT,,T,C,1,rs46687464,,,,0,,,,1,0,0,,,
UNC6220293,3,129064647,-,GAAGCACAGAATAAAAATGTGACATTTGAGAGGAGGGAAAGGAGTGGGGA,,A,G,1,rs31239613,,,,0,,,,1,0,0,,,
S3J035163568,3,129089213,+,TATACCTCATCAACCACTCAGCGCTTTTATTCTTGGTAACCATGACTCAC,,G,A,1,rs36607899,C3H/HeJ,substrain,C3H/HeJ,0,A,,,1,0,0,,,
UNC6221860,3,129172395,-,CAGCCTTACTCCATTGTGACTCCATTATCTCTCTCAGCAGATACCATTTG,,A,G,1,rs258287251,,,,0,,,,1,0,0,,,
UNC6221985,3,129181940,-,GTAGGATTCCCCCTAGGGATCACAGTGCAATCTCTGTCTCAGCGTTTTCC,,A,G,1,rs262561359,,,,0,,,,1,0,0,,,
JAX00537378,3,129182102,+,CTCCAAAGAGGACTTCTCAGATGTTTCTTCAGTACCCTTCCAACTTTGGC,,A,G,1,rs36929613,,,,0,,,,1,0,0,,,
gUNC6222319,3,129224825,+,CAGGTCCCGGGTAGCTGGGAAGGACCTTTTGGACCTTGGAGTTCCGTTCC,,A,G,1,rs37835643,,,,0,,,,1,0,0,,,
UNC6222319,3,129224825,-,TGGAGCCGCGGTATCTGGACAATCCGAGAAGCTAAGCTCTGTGGGCCGGG,,A,G,1,rs37835643,,,,0,,,,1,0,0,,,
UNC6222615,3,129248074,+,CTTGGATCACCTAGATAATACAAAAGTCTTCAACTGATGTAACCAAGACA,,T,C,1,rs108232033,,,,0,,,,1,0,0,,,
DP3035171648,3,129291201,-,TGATGACATTGTGGCCAATGACTCTGAATCCTTCCAGAAATCCCAAATCG,,C,T,2,,129P3/J,substrain,129P3/J,0,T,,,1,0,0,SPIKE,,
UNC6225534,3,129422664,+,CGCCCATCTGACTCCAAATGTCAACGGTCCATCTAACAGGCACATACTAA,,G,T,1,rs30404390,,,,0,,,,1,0,0,,,
UNC6226186,3,129469583,+,CTTTTCATTTAAGTATTGTCAAAACATAAAATAATACCATCACAGCCTAG,,A,G,1,rs36692102,,,,0,,,,1,0,0,,,
mUNC6229155,3,129683801,+,GATCCCCCTGTTTCTATCTCCCCAGTGTTACAGATGTAAGTGCACAGTGT,,G,A,1,rs52563405,,,,0,,,,1,0,0,,,
gUNC6247460,3,130791329,-,TGTGTCAAAGATCCTCAGGGAGACAAAGACAAAAACTACATTCAGACTTA,,C,T,1,rs36880621,,,,0,,,,1,0,0,,,
S6Y035232901,3,130822542,-,GTCTATTTGGGGCCATTTCAGGATTTGTTAGAAATTCTGTCCAAATTCAA,,T,G,1,rs46568959,,,,0,,,,1,0,0,,,
SSR035248118,3,131202968,-,GTTGCTACAGCGGCATGGTATTTTATGCATAAGTCAGTGAGGAGAGAGAA,,G,A,1,rs230733183,,,,0,,,,1,0,0,,,
SSR035263141,3,131578543,-,GTGTCTGGATCACCACAGCCTTACAGTATTTCTAAAGTCAAGCAGGATGA,,A,G,1,rs233419587,,,,0,,,,1,0,0,,,
SBJ035272030,3,131800760,+,CTCAAAAGAACAAGGTGAACAATTCCTGAGGAACAAAACCTGAGGTTAGC,,C,T,1,rs218459143,BALB/cJ,substrain,BALB/cJ,0,T,,,1,0,0,,,
SSH035274752,3,131868806,+,CACCTAAAGTGCGCTTAGCTATTTGTAAAGCTATCTGGAGAGAAATAGCA,,T,C,1,rs3675768,,,,0,,,,1,0,0,,,
SSH035274975,3,131874390,+,TTGTGTACAAGAACTTCATGGCTCCTCTTGGAGGTATATTTGCATGAACG,,A,G,1,rs31476491,,,,0,,,,1,0,0,,,
SSR035274986,3,131874651,-,GATCTGATGAAAGCTCTAGAACTAGCAGGAAGAAACTTCGTGACAAGAGA,,G,A,1,rs30161149,,,,0,,,,1,0,0,,,
SSH035276932,3,131923303,-,AGGTTAAGTTGTGAAGCCAGAATTCCAGTACAACAGCCTGTCAAGGAATA,,A,G,1,rs253080846,,,,0,,,,1,0,0,,,
SSH035279587,3,131989684,+,ACCAGCTTTGAATAAGGCCATGGAAATTGAAAATGGGAATAATGGAGGGA,,G,A,1,rs50691982,,,,0,,,,1,0,0,,,
gUNC6264274,3,132020398,+,AACACTCCACCATAGACTTTTCAACAGCATACACATACAAGTGGCTGCTC,,C,T,1,rs30560490,,,,0,,,,1,0,0,,,
SSR035281155,3,132028895,+,GTGCCATTTTCACAGAGGGATTACCTTCATAGCTCCTTGCATTTCTTATT,,C,T,1,rs30678542,,,,0,,,,1,0,0,,,
S6R035281336,3,132033413,+,ACATTAACTCCTAGTCATAGGAAATAAGCTACATTTCACTCAAGGCAAAG,,G,A,1,rs222220990,,,,0,,,,1,0,0,,,
SSH035282598,3,132064966,+,GAGCTCTGCACCTGTTACTGTAAAACCTTACCTAACAGCACTACCCTCAA,,A,G,1,rs30682177,,,,0,,,,1,0,0,,,
SSR035282789,3,132069725,-,TGGCTTATAAGGTTATAAGGTGAGGCAGGTGTGCCTGATACAAATAGGAT,,C,T,1,rs30677093,,,,0,,,,1,0,0,,,
SSR035282807,3,132070177,+,TATTTATTCCCAATGTTTCCCTCAATGTCCTTTCTTGATGCTAAGAATCA,,A,G,1,rs51415556,,,,0,,,,1,0,0,,,
SSR035282924,3,132073104,-,AAATAACACACTACTCAAAAAAAAAAAAAAAAAAAAGAAGGAGGAACAAA,,T,C,3,rs262982284,,,,0,,,,1,0,0,,,
SSR035282975,3,132074398,-,TCTGTGTTACTCCCAGTATTAATGGTAAGGTTCAAACTGCCCTGTGAGCA,,A,G,1,rs30680636,,,,0,,,,1,0,0,,,
SSR035282992,3,132074806,+,GTACAACTTGCTTCCTGAGATGCCTGAGTGCAGAGGGACCAAGAATCCAT,,G,T,1,rs30680640,,,,0,,,,1,0,0,,,
gUNC6265372,3,132075087,+,AAAAATGTTTCTGCACTCAAGTAATATTTGAGTATCCTAACATCAAAACA,,G,A,1,rs30681458,,,,0,,,,1,0,0,,,
gUNC6265372b,3,132075087,+,AAAAATGTTTCTGCACTCAAGTAATATTTGAGTATCCTAACATCAAAACA,,G,A,1,rs30681458,,,,0,,,,1,0,0,,,
B10030132552,3,132552449,+,TCAACAGTGCAATTTTTACTCTGCTGGTTCTGGATCACCTTTGATCACCT,,T,G,1,,C57BL/10,strain group,"C57BL/10ScSnJ, C57BL/10SnJ",0,G,,,1,0,0,,,
S2H035303926,3,132598171,-,GTTGCATCTGGGAGAAGCTGTTTTCTTGGCATTTTCTATTTCAGTCTTTT,,A,G,2,,DBA/2JOlaHsd,substrain,DBA/2JOlaHsd,0,G,,,1,0,0,,,
gJAX00113359,3,132779603,+,GATCTAGGGGGATTTCCTTCTTTAGAAGCAGTGTTTGCTGCTGTAGGGTA,,A,G,1,rs31573575,,,,0,,,,1,0,0,,,
S6J035325488,3,133137206,-,CTGCCACTCCTGAGCCCCCTCAATGTTAGTCCTCATTCGGGGTGTGCGTA,,A,G,1,rs6153625,C57BL/6J,substrain,C57BL/6J,0,A,,,1,0,0,,E2,E3
gJAX00113396,3,133244175,+,CTCAGTTTCTTCGCCTTCCAAAGCTGAGCCTCGGGTTGATCTCAGTGTTT,,C,T,1,rs30762478,,,,0,,,,1,0,0,,,
gJAX00113456,3,134048247,-,TTCAATTTACTCTCCTCTTTCAAGAATATGTAAAAGTGTCTTCTCAGTGG,,T,C,1,rs47881483,,,,0,,,,1,0,0,,,
gJAX00113489,3,134478458,+,TGAAGATTAAATCTAAACATATTGAATGACATCATTGGACCCTCTTGACC,,C,T,1,rs50266700,,,,0,,,,1,0,0,,,
SFJ035412079,3,135301991,-,CAGGGGTTGAATTTATGTCACCACGTTTGGCAGTAAAGGGTCTTTACTCA,,A,G,3,rs387800044,,,,0,,,,1,0,0,,,
gUNC6309280,3,135362548,+,TAGTTGTGTATGCACTTATAAACTAGTGAAAGCCAGTGTTCAGCCAGGTG,,T,C,1,rs36478045,,,,0,,,,1,0,0,,,
DFT035418031,3,135450784,+,AATCTGTTGCTTGCTGCTTTTTAGTCACTTTGAGGGTAGTACCCAGTCTT,,T,C,1,,FVB/NTac,substrain,FVB/NTac,0,C,,,1,0,0,SPIKE,,
gJAX00113606,3,136023973,-,CAAGGCTAACTTAGAACATTTCTTGCCGTGTAGGAATGGAAGACAAGACA,,G,A,1,rs38781463,,,,0,,,,1,0,0,,,
SFJ035448584,3,136214608,-,GACTTAACCTACCTGAATGGCAGGATGCAGGAGCCATGATAAGGCCTGGG,,G,T,1,rs387446464,FVB/NJ,substrain,FVB/NJ,0,T,,,1,0,0,,,
mUNC6325899,3,136483748,-,AACAAAAAGAATAAAAAGAAGAGGTGTAGGAAGAAGAGGAAGGGGAGGAG,,T,C,1,rs219171836,,,,0,,,,1,0,0,,,
gUNC6331986,3,136924790,+,AGGTCTTGAATACCGGTGTAACATGTCTAGTCGTTCTGTGTATGGCAACG,,A,G,1,rs29975530,,,,0,,,,1,0,0,,,
DS6035477253,3,136931332,+,GAACTCAGCTTGCCTGATAAAAGATATCCAGGCCTTATCATTCCCTCTGA,GAACTCAGCTTGCCTGATAAAAGATATCCAGGCCTTATCATTCCCTCTGT,T,A,3,,,,,0,,,,1,0,0,SPIKE,,
gUNCHS010200,3,137715581,-,TTTTGGGAACAGGGACTGATCATGAGTATTTAGAACCCTTATAAATAGAA,,G,A,3,rs46394274,,,,0,,,,1,0,0,,,
mUNC030241721,3,138382385,-,AAATGCCATACTCCTCACCCAGTAAAGAATAGATACCATAGAAGGTGCAG,,T,C,4,rs47264510,,,,0,,,,1,0,0,,,
SAC035546225,3,138655630,+,AAATAACTAATGCTCAAAGATGGGGCTCATGTGACATGCAGTTCTCACTT,,C,T,1,,A/JCr,substrain,A/JCr,0,T,,,1,0,0,,,
mUNC030244865,3,139156147,-,ACTAATAAGAAGGCATATAAAGATAGTAGGTGCTTGTATATGCTTACACA,,C,T,1,rs49543067,,,,0,,,,1,0,0,,,
gJAX00113867,3,139541413,+,TCAGATAGTGATACACAGGCAACATTTTATACCTCTCCTCATGTGACCAG,,T,C,1,rs31093350,,,,0,,,,1,0,0,,,
gJAX00539599,3,140315565,-,AGGGTGAACTTAGTGTTCATATCCTATAACTTTTTCTTCTTGAATCTATA,,T,G,1,rs31023707,,,,0,,,,1,0,0,,,
S3J035622158,3,140553969,+,CCCAGTTTGTGAACTAAAGGCTTATTGAGTTTAACAAATCTGTCACCAAA,,G,A,1,rs255405986,C3H/HeJ,substrain,C3H/HeJ,0,A,,,1,0,0,,,
mUNC6391970,3,140848129,+,TTTGGGGAGCTGAGGAGAAGAAAATCAGGGGGATTTGGGAGTGGCGTAAC,,T,C,1,rs242892359,,,,0,,,,1,0,0,,,
mUNC030642512,3,141524466,+,TAAGCTACCTGACATGCATGGTAAGAGTGTTATCATAATAATAACTTGGA,,A,C,3,rs48900848,,,,0,,,,1,0,0,,,
SBH035662548,3,141563723,-,ATCACAGGAATTACAACTGCTACAGATGAGAAGCAGGTAAGTCCAGCCAC,,T,C,1,,BALB/cAnNHsd,substrain,BALB/cAnNHsd,0,C,,,1,0,0,,,
S2H035666793,3,141669832,-,CAAAGACTTCAAGGATCTGCCTATTTGTGTCTGCTGCCTCTGTCCCTGGG,,T,C,1,rs52463693,,,,0,,,,1,0,0,,,
gUNC6409039,3,141897899,-,TACAACCTTAAAATCTGCTTGAATTTAAGTGGGTCAAGCAAGGGACACAC,,T,C,1,rs30700851,,,,0,,,,1,0,0,,,
D3C035688732,3,142218308,-,ACAACTCATGGCACCAAATGGACAGGTGTTTTACGACAGTGTTAAATGAT,,G,A,1,,C3H/HeNCrl,substrain,C3H/HeNCrl,0,A,,,1,0,0,SPIKE,,
D1H035703953,3,142598841,+,TAGGAGGAGTAAGAGTCCACTTATGTCTAAGGTGGAAATGAATGGCTGAT,,C,A,1,,,,,0,,,,1,0,0,SPIKE,,
gUNC6421327,3,142639030,+,GTTGGGATTGCTACCAAAGGTTCCACCCTGTCTTACTTGTATGCTTTTAT,,A,G,1,rs30054485,,,,0,,,,1,0,0,,,
S2H035708819,3,142720499,+,GAAGAGTTATCAAAGGCTGCATTTATTGATAACATGAATCAATACACAAG,,A,G,1,rs30860191,,,,0,,,,1,0,0,,,
gJAX00540289,3,142930821,+,ATTTTTCTACAGGCTGCTGAAATGTTAGATTGTTCACTGTGGCCCAGTAA,,A,C,1,rs31085149,,,,0,,,,1,0,0,,,
gUNCHS010297,3,143466942,-,TTCAGTTATTTAACAGGAATCCCTAGGACTCTCATGGTACAACCCTCTAG,,A,G,1,rs30206761,,,,0,,,,1,0,0,,,
B10030143733,3,143733602,-,TGTGGGTTTTCTCAGCCAGAGTTTACCCAGTTCCTTGCTTCTGTCTGTCG,TGTGGGTTTTCTCAGCCAGAGTTTACCCAGTTCCTTGCTTCTGTCTGTCC,C,G,2,,C57BL/10,strain group,"C57BL/10ScCr, C57BL/10ScNHsd",0,G,,,1,0,0,,,
S2R035762717,3,144067947,-,GGCATTGAGATTGCAATGCCTTGACTTAAAGAATTTAAAGGGCTATCTCT,,C,T,1,rs30257269,DBA/2,strain group,"DBA/2J, DBA/2JRj",0,T,,,1,0,0,,,
gUNC6444169,3,144317639,+,GAACTCATTTTAGCATCTGTCCATGGGTTCTAACTCAGGTATTCTAAGCA,,T,C,1,rs30166546,,,,0,,,,1,0,0,,,
UNC6445132,3,144394667,-,GTTTACAAGTGGGGTGGCAGAGCTTACTCTACCTCCTAAAGCAAACCAGC,,T,C,1,rs30514214,,,,0,,,,1,0,0,,,
gUNC6450714,3,144755362,-,TTGCAGAGGGCTCACCGAGCATGCACGGGCTCTAGGTCCAATAGCTAGAA,,A,G,1,rs31160312,,,,0,,,,1,0,0,,,
SAC035807438,3,145185961,+,ATTGTTATATTGGACATGGTCAATAGAGCCTATGCTCTTCATTTAGAATA,,G,T,1,,A/JCr,substrain,A/JCr,0,T,,,1,0,0,,,
mJAX00114333,3,145767747,+,TGAAATGATTTCTTTTTAGCTGGAAGATGCTGCCTTTCTCTTGTGAAGTT,,C,T,1,rs38791131,,,,0,,,,1,0,0,,,
S6J035852681,3,146317041,-,CCAGCAAGGGTTCATTCCCACTCTCTGGCCACAGCCCCTTGTAGTCAGCC,,T,C,1,rs31290052,C57BL/6J,substrain,C57BL/6J,0,T,,,1,0,0,,E2,E3
gUNC6475139,3,146374133,-,GTAAATGAAGAAGGGCCATGAACTACTTCTCTGTGGAAGTGATGGGGAGC,,T,C,1,rs3707004,,,,0,,,,1,0,0,,,
D3R035858218,3,146455459,+,GGCCTAAACTGGCTTTTACTGGTACAGAGCAGAAAACTCAGGCACTAAAG,,A,G,2,,C3H/HeNRj,substrain,C3H/HeNRj,0,G,,,1,0,0,SPIKE,,
gUNC6478289,3,146595691,+,TACATGCAATGAAAGGACATTGCCAGCTGACAGTTATCAGCTCTGTCCCT,,T,C,1,rs46918767,,,,0,,,,1,0,0,,,
S6J035866443,3,146661093,-,AGTTGGATACAAAATGAGGGTACAAACCGAGATGTCTACATAATGGAATA,,T,C,1,rs31652354,,,,0,,,,1,0,0,,,
DBC035876089,3,146902238,+,TGTGAGCATGTTGTGCTGATTCAGTCATACGTTATGTCTAAGCTTGGTCA,,C,T,1,,BALB/cAnNCrl,substrain,BALB/cAnNCrl,0,T,,,1,0,0,SPIKE,,
SBJ035881520,3,147038007,-,ATAAAAGGGTTAACCTCAGTTTACCCATTTTTCAAAACTGGAATATCTAG,,C,A,1,rs242468753,BALB/cJ,substrain,BALB/cJ,0,A,,,1,0,0,,,
DAH035896673,3,147416832,+,AGTCATCTGGCTGCATATGAGACGATTTCAGGCTCTGAAACAACCAGAAT,,G,A,1,,A/JOlaHsd,substrain,A/JOlaHsd,0,A,,,1,0,0,SPIKE,,
DX1024392526,3,147497725,-,ATATATACTCTGGCACTTCCCCCACATTGTGGCATTGGGCATTGAATGCA,,C,T,1,,129X1/SvJ,substrain,129X1/SvJ,0,T,,,1,0,0,SPIKE,,
gUNC6491714,3,147514132,+,TATTCCTTTACCTGTAAAATGTAAATATAAATGTACAGGGCTTAGGAATG,,T,C,1,rs6296122,,,,0,,,,1,0,0,,,
S1L035907433,3,147685827,+,TGTCTTTATAATGAATATTTGCTGAGACCATATGGTAAAATTGTAGATCC,,C,A,1,,DBA/1LacJ,substrain,DBA/1LacJ,0,A,,,1,0,0,,,
gUNC6501366,3,148193409,-,TGTGATACACATTTTAAAGCATATACCTTCAATATGCTGCAACAAAATTT,,A,G,1,rs232242962,,,,0,,,,1,0,0,,,
gUNC6507289,3,148599485,-,CTTAGAAGTCTGCTGAATGACTTTCTGCTGACTCCACACTCGGCCCTCCT,,C,A,1,rs31225683,,,,0,,,,1,0,0,,,
SFR035956234,3,148905873,+,CTGTCAGCAACATTCTGTTGTGATAAACTTTATAGTCTGCAAGGTGGCTG,,C,T,2,,FVB/NRj,substrain,FVB/NRj,0,T,,,1,0,0,,,
DP2035965862,3,149146566,+,CACACATAGCTCACACTCTATCTAGTGCCAGGTCTAATGTATAGAAACAC,CACACATAGCTCACACTCTATCTAGTGCCAGGTCTAATGTATAGAAACAG,G,C,2,,129P2/OlaHsd,substrain,129P2/OlaHsd,0,C,,,1,0,0,SPIKE,,
B10030149219,3,149219554,+,TGCCAATCACAACCATTCGGTGTTTCCTGAAGCCAATTCAGTTGACTACA,,A,G,1,,C57BL/10,strain group,"C57BL/10ScSnJ, C57BL/10SnJ",0,G,,,1,0,0,,,
gJAX00541929,3,149300601,+,CTGATGGAGTCTTTGTAAGAATTCAGGACCATCCTGTTTACACACCTTAA,,T,C,1,rs31569090,,,,0,,,,1,0,0,,,
gJAX00541998,3,149692043,+,CATGAGCCAGAAGGAATCAGAAACTTCTGCAATGAAGTCCTGAGACTGAC,,A,G,1,rs36289966,,,,0,,,,1,0,0,,,
SS1035990791,3,149769775,-,CTGTAGATGTGATAGTATCAACTGTCTCAAGTTGAAGACACTGTGACCTC,,G,A,1,rs252818652,129S1/SvImJ,substrain,129S1/SvImJ,0,A,,,1,0,0,,CC,CC
S3J035996026,3,149900662,+,TGCACAAGGATCACTAAAGAAGATACAAAGCTGATAATCTTTCCAGTTTC,,G,A,1,rs37448442,C3H/HeJ,substrain,C3H/HeJ,0,A,,,1,0,0,,,
gUNC6530830,3,150599308,-,AACCCAACACAAAAATTCAGGGCAATTCCATTACTACATGAATTAATTAC,,A,G,1,rs30523229,,,,0,,,,1,0,0,,,
gUNC6535995,3,150989770,+,AACTAGTTAGATCTACTTAGAAGAATGCTCAGACTGTACCCAGGAATCCA,,G,A,1,rs30569455,,,,0,,,,1,0,0,,,
S1J036052447,3,151311198,-,GTTGATAACCAGTGGAAACTTCGAGGTAAAGAAATTCTGTGCTTGTTTTA,,C,A,1,,DBA/1J,substrain,DBA/1J,0,A,,,1,0,0,,,
gUNC6544103,3,151618848,+,GTGGACCTAGCTAAGACTCTTTGCATTGGGAGTTGTGGAACCTGAACTGG,,T,C,1,rs229592556,,,,0,,,,1,0,0,,,
SBR036070918,3,151772965,+,CTGGGACTGATTCAAAAGCAGACACACTGATCAATAGGTCATTGGACCCA,,C,T,1,rs3667461,,,,0,,,,1,0,0,,,
S2T036072121,3,151803047,-,CAAGCAGGGCCCACCTGGTGGGAGAGAGGGTCTGTGCCTCAGATAAGAAG,,A,C,2,,DBA/2NTac,substrain,DBA/2NTac,0,C,,,1,0,0,,,
mUNC6547782,3,151947892,-,TAACCCTTCCATCATGCATGTAGACATGCATCATGCCTTGACAGTAACCA,,C,T,1,rs50507158,,,,0,,,,1,0,0,,,
SNJ036079697,3,151992435,+,AAATTATGGATACTGATTGCTGGGAACCTTGATACAAAATCTATTTAAAA,,C,T,1,rs241368655,NOD/ShiLtJ,substrain,NOD/ShiLtJ,0,T,,,1,0,0,,CC,CC
SSH036086655,3,152166395,+,TCCGTCTCAAACACACACCCACGACCAAAGCCCCTCAAATTATAATATTT,,A,G,1,rs254044434,,,,0,,,,1,0,0,,,
S2C036094718,3,152367951,-,CATCCATGAACTGTATCTCAAAGAAAAGTTGTTGATAGACCCACAAGAAC,,A,C,1,,DBA/2NCrl,substrain,DBA/2NCrl,0,C,,,1,0,0,,,
mbackupUNC030289277,3,152903035,+,AGACAGTAGAACAGAAGAGAGAACCGGTTCAGTGGACAAACATTCTCCTC,,G,T,1,rs37822239,,,,0,,,,1,0,0,,,
S3N036121009,3,153025231,+,GCGTTCTTCCTATGGCATAGATTCTACTCCCCCTTCAAAAAGGAAGACAC,,G,A,1,rs263851590,,,,0,,,,1,0,0,,,
SFH036129403,3,153235086,-,CAGCAACCTGGGTATCAGACTGAGAGAAAACAGTCTAGAAACAAGATCGC,,A,G,1,rs50203040,,,,0,,,,1,0,0,,,
B10030153239,3,153239443,-,ACTTAGGAGTTGAAGATTCTCCTCCAAAGAAGCCCAGAGAAGCCCACACT,,C,T,1,,C57BL/10,strain group,"C57BL/10ScCr, C57BL/10ScNHsd",0,T,,,1,0,0,,,
gUNC6570745,3,153538572,+,GGAGGCTTCTGCCTGAGTTAACAGATTTCTACTTCAAAAGTAGACAAGAG,,T,C,1,rs48765976,,,,0,,,,1,0,0,,,
gUNC6581568,3,154127358,-,ATCCTGAAGAACTCAATGCTCAAGACCATCTCCTCTATCCAGGACCAGCA,,G,T,1,rs30584199,,,,0,,,,1,0,0,,,
gUNCHS010452,3,154712527,-,TATTGATATTCTTACTTTGTTTTCAATTTATTTCTCCAATAGACTGAGCC,,G,A,1,rs30724003,,,,0,,,,1,0,0,,,
S2H036188631,3,154715775,-,GGAAAAAATTCCTGAACAGAACACCAATGGTTTGTGCTGTAAGATCAAGA,,T,C,3,rs33860966,,,,0,,,,1,0,0,,,
gUNC6590890,3,154901166,-,ACAAGAAGTCTGGTATAATTCTGGTACATCTGGTCTTTTTCCCTTGCTGC,,G,A,1,rs45986794,,,,0,,,,1,0,0,,,
SBJ036198213,3,154955329,-,ATTCCGTACTCAATTGGCTCATGCTCTGTACAATATCCAGTTCATGGATG,,G,A,1,rs252290345,,,,0,,,,1,0,0,,,
gUNC6596659,3,155407831,-,GAGACACCTTTTTGAAGAATATGTGAGTAGAAGTCTCGGTCTTTACTCAG,,C,T,1,rs247010732,,,,0,,,,1,0,0,,,
SBT036251110,3,156277758,+,CCACATGGAGAAATAGCCAAAGCAAGAGCTGAATTCTGTAGAGCAGTCAT,,G,A,2,rs584175101,BALB/cJBomTac,substrain,BALB/cJBomTac,0,A,,,1,0,0,,,
mUNC6606962,3,156387825,+,CTCCAATACCTCCACTAGCTCTCTCCAACTCATGACCTTTTTAAAAATAT,,T,C,1,rs30217746,,,,0,,,,1,0,0,,,
B10030156955,3,156955501,+,TGAGAAGTTGAAGAAATACTATGTAAATCCTAGTTCTGATCTTCTCTTGG,,G,T,1,,C57BL/10,strain group,"C57BL/10ScCr, C57BL/10ScNHsd",0,T,,,1,0,0,,,
gUNC6614241,3,157023315,-,GGCAACCTAATTGCAATGTGGGTTCTACCCTTGACTGGCCAGCCAGAGTG,,G,A,1,rs31282840,,,,0,,,,1,0,0,,,
S6J036281282,3,157032059,+,TTTCCATGCTCTGGAGGAAAAATAAGTAAACTGTATGGATAACTCTGAAA,,T,C,1,rs30312690,,,,0,,,,1,0,0,,,
gUNC6617899,3,157394139,+,CCAGCTGGCTCCTCAGTGCTATGCAGCAAAGAGGATGTGGAGGAAGGCTA,,T,C,1,rs234964230,,,,0,,,,1,0,0,,,
gUNC6624174,3,158052844,+,AAGTTAGGGGCAGAGCATCTTCAGCACCTGCAGGCCATCCTTGTCCTGGA,,C,T,1,rs13477517,,,,0,,,,1,0,0,,,
S1L036338976,3,158474408,+,CTGTATATACCTATTTAAACACTACATATAACTCCACTAATATGTACACT,,G,T,2,,DBA/1LacJ,substrain,DBA/1LacJ,0,T,,,1,0,0,,,
SBH036343661,3,158591547,-,CACAGAGATCTAAAGTCTCTTTGCTTGAGCGCCAGGTAGACAAAGACTAG,,C,A,1,,BALB/cAnNHsd,substrain,BALB/cAnNHsd,0,A,,,1,0,0,,,
gUNCHS010556,3,158895392,+,ATTTTCTGAGGAACTGCCAAGCTGATTTCCAGAGTGGTTGTACCAGCATG,,T,C,3,rs45943006,,,,0,,,,1,0,0,,,
gUNC6631755,3,159133528,+,CCCTTTGCCTGTATGAGAGCATTCCCCTACCAACACACATTCTCCCACCC,,C,T,1,rs30169751,,,,0,,,,1,0,0,,,
SS1036384566,3,159614157,+,GTTCTAAAGCCTTTAAACCACTTTATTTCAGACAAGGAAGATCCAATAAA,,C,T,1,rs258643699,129S1/SvImJ,substrain,129S1/SvImJ,0,T,,,1,0,0,,CC,CC
mUNC040001211,4,3752096,-,GTGACACTTTGTCACAACAAAAGAAAACATTAACTTGAGAAAGTTTCAAT,,A,G,3,rs49588688,,,,0,,,,1,0,0,,,
gUNC6649201,4,4756222,+,TTCTTTAAAGCAGCAATAAATCCTAGCAGGTGATCCATACCTTTAGCCTG,,A,G,1,rs27692838,,,,0,,,,1,0,0,,,
SFR040193574,4,4839367,+,TTCTCATGCCCTGAAATGAGGCAGATGGACCCTCTGAGCCATGTGTTCTC,,G,A,1,rs27692574,,,,0,,,,1,0,0,,,
gUNC6656359,4,5366880,-,ATGAAGTCACAATTACTCTGATACCTAAACCACACAAAGATCCAATGAAA,,C,T,4,rs228349165,,,,0,,,,1,0,0,,,
mJAX00115551,4,5435867,+,CTGGTCCCTATACTTACTCTTGGTACTTACTGTGCTTTGACAAGTATTTC,,G,T,1,rs13477538,,,,0,,,,1,0,0,,,
S1J040247595,4,6189886,-,AAAAATTCCCATCATGTTTTTGACAAGAAATGACCTTTTAATGTTGGGCC,,A,C,1,,DBA/1J,substrain,DBA/1J,0,C,,,1,0,0,,,
mUNC040002854,4,6376626,-,AGTGCCAACAGAAAATAGTATGCAGGCAAACTGCACTAGGAAGATACTCA,,A,G,1,rs32183067,,,,0,,,,1,0,0,,,
SBH040266617,4,6665430,-,CCTCCAGGAAGGACAGTAACAAGCTGGGTGTCTGTCTATGCAAGCTGCTT,,C,A,1,,BALB/cAnNHsd,substrain,BALB/cAnNHsd,0,A,,,1,0,0,,,
gUNCHS010622,4,6712326,+,CATTGGTATTTGTGGGTTCATCAGAATTTTAAGAGCCTCTAGGCTACATT,,T,C,1,rs239784827,,,,0,,,,1,0,0,,,
SBH040272535,4,6813399,-,TCCTTTTTAAATGAATGTTTTTATTTTCTGAGGAGAGAAAGTCCTATGAA,,C,T,1,,BALB/cAnNHsd,substrain,BALB/cAnNHsd,0,T,,,1,0,0,,,
SAJ040285863,4,7146585,-,GAAACTTTCAACTAAATCAATTGTCTAATAATGATACAGGCTTCCTAGTA,,C,T,1,rs27658062,A/J,substrain,A/J,0,T,,,1,0,0,,CC,CC
gUNC6678659,4,7209932,-,CTGCCTTGGCCTCCCAAGAGCACTAGGATTCTATGCATATACCACTTTCC,,A,G,1,rs27709102,,,,0,,,,1,0,0,,,
B10040007394,4,7394952,-,AGCTGTGTTGCTTCTGCCTGTCTCAGAAGCTCTGTTGTTTCTGTAGTCTG,,G,T,3,,,,,0,,,,1,0,0,,,
gUNC6687508,4,7969886,+,CATGGCTGCATGGCTGTAATCCCAGTGTTGATAGGATCAAAGGGAAGATC,,T,G,1,rs32796812,,,,0,,,,1,0,0,,,
SNT040331842,4,8296060,+,GGACCACTCTCATAAAAGGCATCCCTGTCTTCCCATAGGTGATGTAAATA,,G,A,1,,NOD/MrkTac,substrain,NOD/MrkTac,0,A,,,1,0,0,,,
mUNC040475523,4,8661591,+,CTGTGCACCTGGGCACTGCCCTGTGGAGGTCTGCACTCTGGTTTCTGTGC,,A,G,3,rs244575943,,,,0,,,,1,0,0,,,
gUNC6709591,4,9418983,-,CACAAATATATAACCCAATTAGTACATGTATAAAAGACTTGAAGGAACAC,,G,A,1,rs32914113,,,,0,,,,1,0,0,,,
DP3040377457,4,9436430,+,CTGAGAAGAGGTGATTCATCCAGGATTCAAAAACCAGGCAAAGAACCAGG,,C,T,2,,129P3/J,substrain,129P3/J,0,T,,,1,0,0,SPIKE,,
gUNC6714828,4,9736147,+,TTCAATCCCATGTCAAAGGGGGAACAAAATAATCATGGGAGATAGAGAAA,,G,A,1,rs242839355,,,,0,,,,1,0,0,,,
S1J040408463,4,10211593,-,CTGCCTCCAGTCTATTCTGAAAAAGGGCTGACTATCCTAAGGGAGAAATA,,C,T,1,,DBA/1J,substrain,DBA/1J,0,T,,,1,0,0,,,
B10040010460,4,10460647,+,GTATTGAAATACTGCAATTTTACTTGCTCGTGTATTCAGGATTCCTGTGT,,G,A,1,,C57BL/10,strain group,"C57BL/10ScCr, C57BL/10ScNHsd",0,A,,,1,0,0,,,
gUNC6724691,4,10595562,+,GCCCACTTTGCAAAGCCTCTCTTTCTGCAACGATATTAGGTCATTGCTTC,,A,C,1,rs27687245,,,,0,,,,1,0,0,,,
mJAX00115984,4,11221235,+,TGGTTAGACACACTGCAGATCTGAACAACAACTTCCCAGAGGTCTTTAGC,,G,A,1,rs13477559,,,,0,,,,1,0,0,,,
S3J040450362,4,11259058,-,TCCCAAAAGCTCTTGGGAGTCAGCAACTTCTGAATGGCTAGAGTTTGACA,,C,T,1,rs230568095,C3H/HeJ,substrain,C3H/HeJ,0,T,,,1,0,0,,,
gJAX00545177,4,11352296,-,TGGTGGAAACTTTGGAGTCACTTTCATATATCTGCTTGTGATTCTAACTT,,C,T,1,rs27713542,129S1/SvImJ,substrain,129S1/SvImJ,0,T,,,1,0,0,,CC,CC
gUNC6736815,4,11472100,+,TGTCTTTTAAAGAATGTTTAAAGAATGTTTTTGTAACTATATTATTATTA,,A,C,1,rs32323404,,,,0,,,,1,0,0,,,
gUNC6746325,4,12206498,-,CTCCCTGGTCCAAGGATATACAAACCATCACACTACCCAATTCGTTCTAT,,T,C,1,rs212932031,,,,0,,,,1,0,0,,,
gUNCHS010701,4,12730287,-,TAGGGCGCAAACCCACAAAGGATTTCGATCCTGCATTGAGTTGTCTGACA,,G,T,1,rs234982074,,,,0,,,,1,0,0,,,
DP2040523734,4,13093367,-,AAATGTGTTTATCATCCTGACAGAGGGCCTGATCCAGTAAGTCTCCAAAA,,C,T,3,,,,,0,,,,1,0,0,SPIKE,,
gUNC6760525,4,13421708,-,TTCAGGAGACTAGGGCCAAGTTTCAGTTTCCTAGAGCTGGGAAAGTCAGT,,G,A,1,rs46334140,,,,0,,,,1,0,0,,,
SBC040552369,4,13809236,-,TCCTCTTCACCTAAGCACCTTGGGTGCTCCATTCCAGCTGCATTCCCAGT,,A,G,1,rs27729168,,,,0,,,,1,0,0,,,
S2J040562890,4,14072250,-,CTACATAAGCAGTCTTGTAAAACTAGGGTTGAAAGTATCAGCTGAAGGAG,,G,A,1,rs28264900,,,,0,,,,1,0,0,,,
gUNC6772759,4,14333819,-,CATAAATGCCTTAAACATAAAGGTACCTCCTCTCTCCTTGATTGGGATTT,,T,C,1,rs3677628,,,,0,,,,1,0,0,,,
mUNC040484828,4,14821683,+,CAGATTATTACTTAATACCCATGATAGTCCTCATAGATATTATTTTTCCT,,C,T,1,rs228149650,,,,0,,,,1,0,0,,,
D2H040598604,4,14965114,+,TACCATTGTTTGTGGAAAATGATGCACATACTGATTTACGGGACCAGTCA,,T,G,2,,DBA/2JOlaHsd,substrain,DBA/2JOlaHsd,0,G,,,1,0,0,SPIKE,,
gUNC6783176,4,15131304,+,ACTACTTCTCGTGACATGCTCAGGATGCTTTCTTATACAACTCAGGACCA,,T,C,3,rs31793585,,,,0,,,,1,0,0,,,
SS1040614079,4,15351980,+,TTTACTGTTTAGAATAAGAATTAAAATATGGTCTTTGGGTCAGGCGAGTC,,A,G,1,rs241610905,129S1/SvImJ,substrain,129S1/SvImJ,1,,,,1,0,0,,,
mJAX00545910,4,15635309,+,GGATGGTAGATGGAACTATTCCTGAAAAATCAGGAGATAGCAGTTCAATG,,G,T,1,rs27742297,,,,0,,,,1,0,0,,,
SBT040628592,4,15714824,+,CTATAGCTTCCATCCTCCGGAGAACTGACTCTTGTCTCAAGTTACACACT,,C,T,1,rs252780266,,,,0,,,,1,0,0,,,
SFJ040637736,4,15943406,+,TTAGCTGTAATATATTTACTCTCAAAACCATGATGTTGCTTGGCAGCTTC,,C,T,1,rs27737386,FVB/NJ,substrain,FVB/NJ,0,T,,,1,0,0,,,
ST2040654006,4,16350168,+,TCATGTTTTCAGTAATTTATCTTCTACCTCTGGCAGATAGCCAAGTGCTA,,C,T,1,,129T2/SvEmsJ,substrain,129T2/SvEmsJ,0,T,,,1,0,0,,,
SBB040656604,4,16415105,-,TAATGAGGTGCTAACCAGTTGTGCTTGGGGATGTTGAAACTTTAACACTG,,G,T,1,,BALB/cByJ,substrain,BALB/cByJ,1,T,,,1,0,0,,,
gUNC6802962,4,16568242,+,TATAAATCTTAATGCTCTGACCTCTGATATCTGGTATCTAGGATATCTGA,,T,C,1,rs51858321,,,,0,,,,1,0,0,,,
gICR1457,4,16993681,+,CAGAATCAGAGTTTGCTTGATCATCCTCCTCATCACTCTCTGGTTCCCCC,,G,A,3,rs32813400,,,,0,,,,1,0,0,,,
S2H040685164,4,17129123,-,TAGATGGACCTGGAGGGCATCATCCTGAGTGAGGTTACACATTCACAAAG,,C,T,3,rs264379879,,,,0,,,,1,0,0,,,
SBR040689107,4,17227677,+,CTCATAAGTAGGGGAAATGGTGGTGCTTTATTTCTTTAATATTAAAAACA,,C,T,1,,BALB/c,strain group,"BALB/cByJ, BALB/cByJRj",0,T,,,1,0,0,,,
gUNC6820715,4,17974811,+,AGTAGTTTGTCTAGAAATTTAATATATATTACCTAAACTTGCCACCAGTA,,T,C,1,rs28277673,,,,0,,,,1,0,0,,,
gUNC6822655,4,18137946,+,GGCACTGTCTCTGTTTCCCTGAGGTTATATAAAGGTATCAGTTAGCAGAA,,A,G,1,rs31889526,,,,0,,,,1,0,0,,,
ST2040764383,4,19109590,-,TCAGGTTGAACCAGTAAAAGAAATTTGTGGCTAGATCTATGCCAAGTAAA,,C,A,1,,129T2/SvEmsJ,substrain,129T2/SvEmsJ,0,A,,,1,0,0,,,
gUNC6835865,4,19165893,-,TTTGGAGGAAGGGGGGGGAACAGGGAGGTTCAGGTATAGGAGGGGACATC,,T,C,1,rs32110652,,,,0,,,,1,0,0,,,
SNJ040774039,4,19350988,+,GAACAAAACACCCATGGAAGCAGTTACAGAGACAAAATTTGGAGCTGTGA,,T,C,4,rs584608110,,,,0,,,,1,0,0,,,
S3J040779955,4,19498875,-,TAGGGAGGAACTGTGCTAAGGGACGCTCTACATGTGAAGTATTAACTGAA,,C,A,1,rs27697835,C3H/HeJ,substrain,C3H/HeJ,0,A,,,1,0,0,,,
mUNC040021053,4,19709059,+,CACCCCGGCCTACACCTCCCTTCCTCGGGAGCGCGCAGCGTGCTCGCGAC,,T,G,4,rs214917690,,,,0,,,,1,0,0,,,
SBJ040790064,4,19751612,-,GAAGGCAAGCACTGTGAAGAGAAGTTGTGTTGTGGCATCAGCAGCCTTCC,,T,C,1,rs243523009,BALB/cJ,substrain,BALB/cJ,0,C,,,1,0,0,,,
gUNC6851205,4,20304945,+,AGTGCAGAATTCAATGAGACCTTTAAAGAACACCTAATACCAATACTTCT,,T,C,1,rs48723918,,,,0,,,,1,0,0,,,
B10040020523,4,20523561,+,GCTTAGATAGTAGAATATATCCCATGGACAGGCAACAGCTTTTGAGTAGC,,C,T,1,,C57BL/10,strain group,"C57BL/10ScSnJ, C57BL/10SnJ",0,T,,,1,0,0,,,
gUNC6860017,4,20893255,-,ATCTGTTTTCATTTGTTCCATTCATGCTTATGCAGAGATTAGCAGGAAAG,,T,C,1,rs47727322,,,,0,,,,1,0,0,,,
SBJ040845610,4,21140267,-,ATTGAGGGAAAATGGGTGAGTGCATGTACAAGTGCACATGCAGGCACACA,,G,T,1,rs578891344,,,,0,,,,1,0,0,,,
gUNCHS010808,4,21163050,-,ATAGATGAATAACTAGAAATGTAGAAGCTATCAAAATAAATTCAAGAAAT,,C,T,1,rs231605385,,,,0,,,,1,0,0,,,
gUNC6870906,4,21783619,+,TAGCACCCACAATGGTCTGTAATTCTCCAGTCTCAGGGGAGCTGGCACCC,,G,A,1,rs225782782,,,,0,,,,1,0,0,,,
S3J040875278,4,21881969,+,TGAATGGATATTCTGTGTGATTGGTGTTTATCTCAGCTTGTTCTTCTAGC,,C,T,1,rs217907138,C3H/HeJ,substrain,C3H/HeJ,0,T,,,1,0,0,,,
mUNC6878513,4,22379371,+,GTGTTACTGATTGTGAGCTTAAGAGATGCTTCATCATCTAAAAGGAAGAT,,T,G,1,rs13477602,,,,0,,,,1,0,0,,,
S2T040924117,4,23102946,-,CTTTGCAATGCAATGACATTTCTTTTACTGTTAGATATAAAACAACTCTA,,C,A,1,,DBA/2,strain group,"DBA/2NCrl, DBA/2NTac",0,A,,,1,0,0,,,
S2C040931051,4,23276284,-,GAAGATCTGTCTATTAACTAGTAGACAAGCATCAGCAGAGGGTGCAAATT,,T,G,1,,DBA/2,strain group,"DBA/2NCrl, DBA/2NTac",0,G,,,1,0,0,,,
mUNC040389759,4,23286698,-,CTAAGTGCAGGGGAAAAGGCTTTCCCTGAGGAAAATTTAAATTCAAATAT,,T,C,1,rs232075869,,,,0,,,,1,0,0,,,
D6Y040947583,4,23689580,-,TGAGCTTAGGAGACAAGGAAGACTTAGCACTTTGATTTCAAGGCTGACCC,,T,C,2,,B6N-Tyr<c-Brd>/BrdCrCrl,substrain,B6N-Tyr<c-Brd>/BrdCrCrl,0,C,,,1,0,0,SPIKE,,
SS1040949953,4,23748843,-,TTTTAGGCATCCAGTTACAAGATATGATTATTAAGCATTCATTCATACAT,,T,G,1,rs235431257,129S1/SvImJ,substrain,129S1/SvImJ,0,G,,,1,0,0,,CC,Consensus
S3J040951257,4,23781439,-,ATAAGAATATAGGGCCAGGACCATTAAATATTTTTGTCATGATGAGATTA,,G,A,1,rs27748418,C3H/HeJ,substrain,C3H/HeJ,0,A,,,1,0,0,,,
gUNC6896735,4,23937087,-,ATGGATAGATTGGTGCAAATATTGCAGCAATATATGAGAATGGACTTATG,,T,C,1,rs6271354,,,,0,,,,1,0,0,,,
gUNC6898873,4,24123675,-,GGTCTTTTCATAGTGTCCCATATTTCCTGAATGTTTTATGCCAGGAAATT,,G,A,1,rs216605836,,,,0,,,,1,0,0,,,
gUNC6905295,4,24639993,+,GCAAGAGTTTTTCAAGTCAAAAGCTATTCTTTCTAGGAGAAAAAGTCTGG,,A,C,1,rs27736192,,,,0,,,,1,0,0,,,
S2H041022378,4,25559451,-,AGCTTCACAAATTCGAGTTTATTAATAATCAATTGTAGTGTTTGTGTTAT,,A,G,1,rs32114461,,,,0,,,,1,0,0,,,
gUNC6921057,4,25790171,-,TGTGAACTTTTGCATCCACAGAACAAACTACTGATGTGCTTTGCTGTCAT,,C,T,1,rs247739054,,,,0,,,,1,0,0,,,
mJAX00547070,4,25948116,-,GAGAGGTAGAGGGAAAGTTGCAGAAACGTGAGAAAGAGAGGAGAGAACAA,,A,G,1,rs27738395,,,,0,,,,1,0,0,,,
mUNC040032262,4,26604334,+,TATAAGCAAGATCTAGATTTTGAGATTATTATTTATAAGTCATGATTAAA,,T,G,1,rs32305704,,,,0,,,,1,0,0,,,
S1J041071145,4,26778646,+,GCTAAATCTGCTTCTGCAGTGATTTCAGAACATGAGCATTTCATAACTGT,,C,T,1,,DBA/1J,substrain,DBA/1J,0,T,,,1,0,0,,,
gJAX00547226,4,27442883,-,ACATAGATTAAATGGTGACATAGGAATTAATCTACAGTAACATGACTCTT,,A,G,1,rs27724277,,,,0,,,,1,0,0,,,
B10040027520,4,27520894,+,TGCTATATAATGCCTCGAGGTTCTTTAGTATTTTAACATACGAATGTTTT,,A,G,1,,C57BL/10,strain group,"C57BL/10ScCr, C57BL/10ScNHsd",0,G,,,1,0,0,,,
B10040027805,4,27805760,-,GCTGGAAAGGATGAATGGAAAGATTTCACAAGTGAAATTATAAGTAAAAA,,C,A,1,,C57BL/10,strain group,"C57BL/10ScCr, C57BL/10ScNHsd",0,A,,,1,0,0,,,
mUNC040390571,4,27809481,-,ACGTATAACTCCAGTTCTAGGTCATGCACTATCTTATTTTGGTCTTCATA,,A,C,3,rs264634915,,,,0,,,,1,0,0,,,
gJAX00547357,4,28703468,-,TTTGAATTATGTTCTGTGAGACCTAGGCACAATAGGGTGAATAAAAAAAA,,G,T,1,rs27739900,,,,0,,,,1,0,0,,,
gUNC6974225,4,29274068,+,CAGTGGAGGGGTTGATCGGATATACCATGCAATGAATCAAGCCAATTTGA,,G,A,1,rs50102689,,,,0,,,,1,0,0,,,
gUNC6976496,4,29418971,+,CTGTTGGCTGTAATCCCAATGCTGATTTTATTTATAGATTTGATGCTGTT,,C,T,1,rs27774848,,,,0,,,,1,0,0,,,
DX1025227525,4,29472927,-,GTACTATCCATCCTCTGTCCCCAGAAAAGCACCAAGACTGCAATGGAGGT,,C,T,1,,129X1/SvJ,substrain,129X1/SvJ,0,T,,,1,0,0,SPIKE,,
D3N041204705,4,30117627,-,AAATATTATGAGATGGTGCCTCCATGCTGCCCTTGTGCATACTCTGTAAT,,T,C,1,,C3H/HeNHsd,substrain,C3H/HeNHsd,0,C,,,1,0,0,SPIKE,,
mbackupUNC040036735,4,30292924,+,ATTATATTACCTGTTATCCTCTGGAATTAAAAGTAGAATAATAGCCGGTG,,A,G,1,rs32621057,,,,0,,,,1,0,0,,,
B10040030299,4,30299883,+,TTTCTGCCCTACTAGTCCCTTACCTTGACTCTCCCTCCACTATAATCATG,,T,G,1,,C57BL/10,strain group,"C57BL/10ScCr, C57BL/10ScNHsd",0,G,,,1,0,0,,,
gUNC6997896,4,31008705,+,ATTCCTAGGGACACAAATTAATATCAGGCTTTTTCTGGACTTGTCTGTGA,,C,A,1,rs27741452,,,,0,,,,1,0,0,,,
gUNC7004185,4,31577446,+,TGTAAACTCAGTGATATGCCCAACTGAGAAAAGACAGGCTTCCCATTGCC,,T,C,1,rs248373577,,,,0,,,,1,0,0,,,
DS4041287976,4,32199405,-,TTTGCTTCTTTGTCAAAGCCTATAGTGGCGCAATAGGAAACGCTGTAGTA,,G,A,1,,129S4/SvJaeJ,substrain,129S4/SvJaeJ,0,A,,,1,0,0,SPIKE,,
gUNC7014151,4,32311061,+,AAACACGTCCTCTCCCCCTGAAGTCCAACCAAACAATCCACTTAGGGGAA,,G,T,1,rs51404712,,,,0,,,,1,0,0,,,
SSR041292501,4,32312530,+,CTCTTACCTAAAAGCTTTTCTGTCTTATGTCTAGTCTTTTGTTTACACAG,,C,T,2,,129S2/SvPasOrlRj,substrain,129S2/SvPasOrlRj,0,T,,,1,0,0,,,
gUNC7022910,4,32958598,+,TGCTCTTTCAGAGGACAAGAGTTGGTTCCCAACATCAGGGCAGCTCACAG,,T,C,1,rs32395765,,,,0,,,,1,0,0,,,
SFT041323072,4,33076810,+,AGAGGCTACCCTGTCATGGTGGACTTCTACCGTATACATGTATAAAAAGC,,A,G,1,rs32275661,,,,0,,,,1,0,0,,,
gUNCHS010961,4,33497387,-,AAGACACTGTTAGGGTTTTGTTCCGTTTATGCAGGATCTCAAGACTGCTG,,A,G,1,rs242554899,,,,0,,,,1,0,0,,,
DS6041351645,4,33791148,-,TGAGATTGTGGGCCTATGCCAGCATGCCTGGACTTTATTTTCATTCTTAA,,T,G,1,,129S6/SvEvTac,substrain,129S6/SvEvTac,0,G,,,1,0,0,SPIKE,,
gUNC7035643,4,33977539,-,ACATTCACCCAGCGATTTCATCTCCTCAGCTCTGTGCTTTCCATAGCTGT,,G,T,1,rs27772021,,,,0,,,,1,0,0,,,
SS1041365201,4,34130046,+,TGTGACCTTCCACTGGAGCAGAGCATGGTTGACTTATTGGAAGAAACACA,,C,T,1,rs230664715,129S1/SvImJ,substrain,129S1/SvImJ,1,T,,,1,0,0,,CC,Not Fixed
S1H041370714,4,34267856,-,CTCCTGGAAATAAATGATCCCTAGGAATTTCAATATTATCTTATAATCTA,,T,C,1,,DBA/1,strain group,"DBA/1LacJ, DBA/1OlaHsd",0,C,,,1,0,0,,,
D1H041400574,4,35014359,-,TTATGTCCCTTGGCTATCATCTCCTCATTTGAGGATCCTGACATTTCTTC,,C,T,1,,DBA/1OlaHsd,substrain,DBA/1OlaHsd,0,T,,,1,0,0,SPIKE,,
S6R041402189,4,35054735,-,TGGGATTCACCAGGGTAGAGGGTTGAGGAAGTAGGCTGGGTAAATTAAGC,,C,T,1,rs49980226,,,,0,,,,1,0,0,,,
gUNC7050195,4,35308944,-,TGGGTATGCTTGATTCTAAACCACAGGAGTCAGTACAGCTTTCAAGCAGG,,T,C,1,rs52022886,,,,0,,,,1,0,0,,,
S1J041419825,4,35495629,+,GTAGACAGTCTGGCTTTTCAGCAGGGAAATAGCTTAACTGAGTTCCTGTA,,C,A,1,,DBA/1J,substrain,DBA/1J,0,A,,,1,0,0,,,
mUNC7053705,4,35757499,+,GGCAGCTATGTTATATAAAACAGTGGGTTGCAAAGAACCCAATGGACTTA,,A,G,1,rs238122591,,,,0,,,,1,0,0,,,
ST2041432706,4,35817670,+,AAATGAATTGGATCCAGGAACCCAAATATGTTTACTAACAGTTCTTTCAA,,C,T,1,rs46865790,,,,0,,,,1,0,0,,,
DAH041452115,4,36302877,+,ACACTGGAAACTTTGTCACCAGTTCTACTAGTGTCCATCTTGCAGTACCG,ACACTGGAAACTTTGTCACCAGTTCTACTAGTGTCCATCTTGCAGTACCC,C,G,1,,A/JOlaHsd,substrain,A/JOlaHsd,0,G,,,1,0,0,SPIKE,,
S1J041453990,4,36349756,-,CTTTGTGTTTTCGTGGTTATTTAGTTTATTGAAATAGAAAAATATGGTGG,,G,A,1,,DBA/1J,substrain,DBA/1J,0,A,,,1,0,0,,,
gJAX00548393,4,36548543,+,TGTACTTTTCTTTAATGGAAGGTAACTCTGCTCCACAGAGAATCAACTTG,,A,G,1,rs27802861,,,,0,,,,1,0,0,,,
gJAX00117877,4,36915566,-,AGACCCTCTGTATTCACATCTCTATATCTTTGATGTCTAGCCTGACCTAT,,G,A,1,rs32451817,,,,0,,,,1,0,0,,,
ST2041501693,4,37542348,-,CGGCCTGTTCTACCTTCAAGAATTTGAGGATGATTGACAGCTCTATGTAA,,G,A,1,rs45968608,,,,0,,,,1,0,0,,,
gUNC7075573,4,37730915,+,AAACCATATAGGTTAGATTCCTTTCTAGAACTAATCTACCCTGCTCTCGG,,G,A,1,rs32808857,,,,0,,,,1,0,0,,,
S1H041530401,4,38260047,+,TCTTTTGTAAATTACATTTAAGAAGTCATTGAGGGAATCCAGTACTCATA,,C,T,1,rs51963902,,,,0,,,,1,0,0,,,
gJAX00548572,4,38376189,-,AATAAGCTTACCTATACCTACAGAATACCTGGTATCACCCCTTCCTTTCC,,T,C,1,rs27785204,,,,0,,,,1,0,0,,,
SBR041537028,4,38425714,+,ACTCCAGTTCACAAGGTTTCATAATACTCATATACCTAAAATGAGAAAGG,,G,A,1,rs31789632,,,,0,,,,1,0,0,,,
mbackupUNC040051095,4,38664065,-,TTCTTTAATATAACCAAACAAAGATCTTTTTCACCTGGTCTCTGAGAATC,,G,A,1,rs51935404,,,,0,,,,1,0,0,,,
gJAX00118056,4,39331074,-,ATTGAGCAAAGTGCAGAGTAACTATCAGGCTTTTCAGGAAGTTTTCCAGC,,T,C,1,rs32859487,,,,0,,,,1,0,0,,,
gUNCHS011039,4,39734909,-,ATTAATCTTGATCATCAGCTGGATTTGGCTGGGATATACACTGGTGAGTG,,C,T,1,rs32736920,,,,0,,,,1,0,0,,,
SAJ041625905,4,40647631,+,TTATCAGTGACAAACTTTTACCACAACAGAAAAACCAGAGCTCTGAGGAC,,G,A,1,rs227934595,,,,0,,,,1,0,0,,,
mUNC7114925,4,40759497,-,ATGTTCTCAGCAGTACTTGACTCAGGGACCTCCCAATATTTTGTAATCTT,,G,A,1,rs261013104,,,,0,,,,1,0,0,,,
gUNC7120584,4,41328509,+,ACCTCGTCTCTCTGGTGTCTATTTGCTTCGTGAAAGCAGGCATGCCCTCC,,G,A,1,rs28303103,,,,0,,,,1,0,0,,,
SS6041718475,4,42961884,+,CAAGCAAAACACTCATGCCTATAAGGATGCCGGATGGTGGTGGTACAAAC,,C,A,1,rs49232152,,,,0,,,,1,0,0,,,
SS6041721359,4,43033998,+,GGAACATCTTCACCACAGTCTGGTTGGGGTTAAATAAGGTCTGGGGACAG,,G,A,1,rs3141923,,,,0,,,,1,0,0,,,
gUNC7129204,4,43148936,+,TAATCACAGTGAAGGAGTCCTCAGCTCAGTAGCATAGTATGGGTCTAGGC,,G,A,1,rs27868666,,,,0,,,,1,0,0,,,
S2J041742214,4,43555353,+,CGGGAATCCACATTCTGGTCTGAGTAGAAGAACTTTCTCCGCAGCAGCAA,,C,T,1,rs28327706,DBA/2J,substrain,DBA/2J,0,T,,,1,0,0,,E2,Consensus
S2R041743922,4,43598063,-,CCTTCTGCAGCCTAAGGAGTTCCTCTTGACACTGAGGGGCCTGGACTCAG,,C,T,2,,DBA/2JRj,substrain,DBA/2JRj,0,T,,,1,0,0,,,
gUNC7138134,4,43710776,-,GGATAGTGGTCACTGGCCACCTGTTCTGCACTGACCAAGGACAAGTGACA,,G,A,1,rs28311698,,,,0,,,,1,0,0,,,
SAJ041754242,4,43856071,-,GTTACAGCTGTGAGTGTTGTAGGTTATGTGGGAAGAAAGCAATAAGAGCT,,T,C,1,,,,,0,,,,1,0,0,,,
SS6041757108,4,43927723,-,GTACAGAAATATACACCTGTACTTCCAGAACTGGAAAGCTGAGGCAGGAA,,C,T,1,rs257333962,,,,0,,,,1,0,0,,,
SS6041768866,4,44221653,+,TTATACAGAACACACAGCGATATGAATTATGGACAGTCCTTTATCCACAC,,A,G,1,rs27847720,,,,0,,,,1,0,0,,,
gUNC7148109,4,44359562,+,ATGACGAAGGCAACTCTTATAAAAGAAAGCATTTAGTTGAGTCTTGCTAA,,C,A,1,rs241044042,,,,0,,,,1,0,0,,,
gJAX00549476,4,44520090,+,TGCAGTAACTGGATTAAATGTGAGGTATGAGGAAAGACCTTTCTGGGGTT,,T,C,1,rs27845987,,,,0,,,,1,0,0,,,
B10040044961,4,44961659,-,CCACCCCCCTTTCTGGGTCAGATGTCATTTTCAGTTTACCTAGTAAGATG,CCACCCCCCTTTCTGGGTCAGATGTCATTTTCAGTTTACCTAGTAAGATC,C,G,1,,C57BL/10,strain group,"C57BL/10ScCr, C57BL/10ScNHsd",0,G,,,1,0,0,,,
S3C041802742,4,45068574,+,TTAGCTTCTCAAGTAGCTAGGACTACAGGAACACCCCATGTGCGTTCACA,,C,T,1,,C3H/HeNCrl,substrain,C3H/HeNCrl,0,T,,,1,0,0,,,
DSB041810340,4,45258516,+,TGCCTGTCAGCAATGATTTGAATCTCTTGGGTGTCCATACTTGTGAAAAT,,G,A,2,,129S5/SvEvBrd,substrain,129S5/SvEvBrd,0,A,,,1,0,0,SPIKE,,
gUNC7162427,4,45419014,+,TTTGTTTGTATATCTATGTATACACATACATACAAACAACTCCCCCAGAG,,G,A,1,rs246852090,,,,0,,,,1,0,0,,,
S3J041830729,4,45768243,+,CACGATGCAGATTCTGGCAGGGGGCCCAGCCTGGACTTGCTCATCTCACT,,C,T,1,rs213681597,C3H/He,strain group,"C3H/HeJ, C3H/HeOuJ",0,T,,,1,0,0,,,
mUNC7170328,4,45950762,-,AAACTCTGGTGTATGGGATGGAAAGTTGTAGACAGATGGGCAGAGGAGAG,,T,C,1,rs28309249,,,,0,,,,1,0,0,,,
DBT041838944,4,45973624,+,GCAGCTCCTCAGCCCTTCTCTTTGGTAGATTTTCTCTTTGCTAAGACAGT,,G,A,2,,BALB/cJBomTac,substrain,BALB/cJBomTac,0,A,,,1,0,0,SPIKE,,
gUNCHS011178,4,46546799,+,ATCACATCTTGGTGACAGTTGATTGTCTTCACTGGCCCAGCAATGACAGA,,A,G,1,rs32340126,,,,0,,,,1,0,0,,,
SBC041880461,4,47011532,+,CTTACAATTCCTAAGTGGCGAATTTCATATGTAAGTTGAGTCCAAATCTC,,C,T,1,rs27821578,,,,0,,,,1,0,0,,,
gUNC7186049,4,47078638,-,TTGTGGAGGTGAGGAGAACTGGGTAGAGTCCCTTCCAGACAGGTTCCAGA,,T,C,1,rs27789427,,,,0,,,,1,0,0,,,
gUNC7197612,4,47912370,+,AATCTTGAGTTCTTATCTTGGAAAACGTATCTTACTGTGGCTGGAGAGAT,,A,G,1,rs245153992,,,,0,,,,1,0,0,,,
UNC7198791,4,48016693,-,GTGGTATCTGACATAAAAGGTGAGACCTCTCCCCTCATGACTGAGAGCGA,,A,G,1,rs27798315,,,,0,,,,1,0,0,,,
gUNC7200671,4,48276544,-,TGGTAGTCCTGGGCTTCTATAAGCTAATACCTTCATTACTGTTGCTTTTG,,A,C,1,rs27856569,,,,0,,,,1,0,0,,,
S2T041936680,4,48417002,+,AACACATTCTCAAGGAGTCAACCAGCCAGACCTAGACTCCATGCTTGTTC,,A,G,1,,DBA/2NTac,substrain,DBA/2NTac,0,G,,,1,0,0,,,
S3T041938712,4,48467822,+,AGAAGCTGCTAGTTGTGGAGGTAAAGCTTCAATCCAGCATTCAATTAACA,,A,G,1,,C3H/HeNTac,substrain,C3H/HeNTac,0,G,,,1,0,0,,,
gUNC7205485,4,48716499,-,TTCAGTAATAGCTAGGTTTAATTACCACTTTGCAGAATTCCTGAAAGCAA,,G,A,1,rs27843173,,,,0,,,,1,0,0,,,
S6H041956808,4,48920213,+,TGAGATTTGGAGTAGAGACACTTGAATCATTGCACTCCATAAATTTAAAA,,C,T,2,,C57BL/6JOlaHsd,substrain,C57BL/6JOlaHsd,0,T,,,1,0,0,,,
S3T041961401,4,49035041,-,TTGTTCTGCCTAGTACCTGTTTGCTTTTGCCTGAACTCCACCTACATACA,,C,T,1,,C3H/He,strain group,"C3H/HeNRj, C3H/HeNTac",0,T,,,1,0,0,,,
SNJ041979029,4,49475732,-,CAGACTTTGGGTCCCCATGGCAGGACTGGGAAGTCCCATGTTTCCTTCTT,,G,A,1,rs27860700,NOD/ShiLtJ,substrain,NOD/ShiLtJ,0,A,,,1,0,0,,CC,CC
mUNC041084362,4,49679723,+,TCTTCTCTTTGGGTCCTCAGAATAAACTTAGATGGAAAGACACACAGGCC,,G,A,1,rs27822820,,,,0,,,,1,0,0,,,
SBH041992002,4,49800069,-,CTGCTCAGAGAGCCTTTAAGTTTGATCACTAACCTGCCTCTGTGACCAGA,,G,A,1,,BALB/cAnNHsd,substrain,BALB/cAnNHsd,0,A,,,1,0,0,,,
gUNC7219031,4,49871636,-,CAAGACCCTTTTGCTCTTTACCTCGGGCTGAGTAGATGCTAGCTTTCAAG,,C,T,1,rs27783149,,,,0,,,,1,0,0,,,
gJAX00118827,4,50504383,-,TGTAAAGTAGAATCTCAGGGTTGTTTTGATTTAATTTCTCTGATTACTAA,,A,G,3,rs32454852,,,,0,,,,1,0,0,,,
SNJ042026586,4,50664652,+,TTGTTTTGTGTTGTTTGATTTTGCTTTACTTTTGTGTTTTCAGGGAAATC,,C,T,1,rs27844579,NOD/ShiLtJ,substrain,NOD/ShiLtJ,0,T,,,1,0,0,,CC,CC
SS1042030588,4,50764722,-,CTAAGAACACAGATTATTTACTCCCCCATCCATAATTTAGTCAAATCCAC,,G,T,1,rs263565591,129S1/SvImJ,substrain,129S1/SvImJ,0,T,,,1,0,0,,CC,CC
mJAX00118885,4,51297590,+,GAAGGTAGAGCAAAGCAGAGTGTGTGGTTCCCATGTCAGCTGTGCTATAC,,A,G,1,rs27780567,,,,0,,,,1,0,0,,,
gUNC7244423,4,51923078,+,AAGATGGTGCTGGGCTGGAGCCAACAGGAATGAAGCCCAGCCACTGGTCA,,G,A,3,rs32409989,,,,0,,,,1,0,0,,,
DBR042094919,4,52372992,+,AGCTGAGGTCATCAACTTTAGTGGCAAAGTGCCTTTATGGTCCTTCCTAA,,A,G,2,,BALB/cByJRj,substrain,BALB/cByJRj,0,G,,,1,0,0,SPIKE,,
SFJ042097591,4,52439777,+,GATGTCATCTTTTACTGCTGTGGAGGAAAAAGGAAGGAGAGGATGGGTGT,,G,T,1,rs27793518,FVB/NJ,substrain,FVB/NJ,0,T,,,1,0,0,,,
gJAX00550942q,4,52567125,-,TCATCTCCTGCTGCTCAGTAGCACTAAGGTGCAGCCTTCCTCATTTGGCA,,C,A,1,rs27776914,A/J,substrain,A/J,0,A,,,1,0,0,,CC,CC
S3C042109508,4,52737705,-,GCCCATATGTATGCCTTGAACACCAGCACCCTGTAGTGTGGAAACAAGAG,,T,C,1,rs27796346,,,,0,,,,1,0,0,,,
B10040052911,4,52911466,-,TCCTTCTCTGAGTGTATGATTCAAATGTTCTTCTCCTTTGCCATGGGTGC,,G,T,1,,C57BL/10,strain group,"C57BL/10ScCr, C57BL/10ScNHsd",0,T,,,1,0,0,,,
gUNC7260027,4,53142706,-,GTTTGGCCAGTCTATATTACTCTGTGCTGATGATTTAGTTCTTCACCCAT,,C,T,1,rs27793834,,,,0,,,,1,0,0,,,
gUNC7264118,4,53436837,+,GATGATAATGGACTGAACCTCTAAACTTGTAAGCCTGCCCTAATCAAATG,,T,C,1,rs32490143,,,,0,,,,1,0,0,,,
DFT042138862,4,53471560,+,TATTACTGTGTTAACGTAGCTTTAAACAATGTTGCCAGCCTTTGGTGTGA,,A,C,1,,FVB/NTac,substrain,FVB/NTac,0,C,,,1,0,0,SPIKE,,
S6J042147777,4,53694441,+,ATGATGTGGTTATTTTCACAGAAAGAGTAGGTGAATTTTGTGGGTATGGT,,G,A,1,rs1134757159,C57BL/6J,substrain,C57BL/6J,0,A,,,1,0,0,,CC,CC
S6J042168044,4,54201111,+,TGCTTGTTCTATTGCATCTGTAGACCTTCCTGCAGTGCTGGGGATTAGAG,,C,T,1,,C57BL/6J,substrain,C57BL/6J,1,T,,,1,0,0,,CC,Not Fixed
gUNC7278421,4,54558611,-,GCCTGTCATGTGGGTCACTACTGGAGTGGATGTAGCATATATGTATATAA,,T,C,4,rs52369442,,,,0,,,,1,0,0,,,
S6Y042191713,4,54792829,+,AAGGATGGGACTTTACTCTGCCTGGGAGACCCTCACTCTCCTCTCTCAGC,,C,T,1,rs27793222,,,,0,,,,1,0,0,,,
gUNC7283374,4,54970808,-,TCTGAAGAGCAACCAGGATTAAAAATCATAATTTTATAGTGATTTTTAAA,,G,A,1,rs52472967,,,,0,,,,1,0,0,,,
gUNC7288237,4,55339735,-,AACAAAAAACCAAGCAAGCCCCCTTTGCACGATTTTCTTTAACAAATCCT,,A,G,1,rs49405299,,,,0,,,,1,0,0,,,
SFC042218138,4,55453472,-,AGGAGAAGCAATAGATAGACCTAGGGGGATAGCTCAGTTGGTAGTGTATG,,C,T,1,rs47682811,,,,0,,,,1,0,0,,,
S6H042221862,4,55546553,+,CTGCAACACAAAGCAGGCTTGGGATAAAGGGCTAGTTAGCACTCCAAGTG,,A,G,2,,C57BL/6JOlaHsd,substrain,C57BL/6JOlaHsd,0,G,,,1,0,0,,,
B10040055869,4,55869607,+,TGTCTCTGTGCATATTTGGGCATTAGCCTACATATTAGTGCACATGGTAT,,G,A,1,,C57BL/10,strain group,"C57BL/10ScCr, C57BL/10ScNHsd",0,A,,,1,0,0,,,
gUNC7300184,4,56199815,-,CTCAGACTGGCACTCAGCTCTTGAATGTTCATTTGGTAATGGGCAAGGAC,,T,C,1,rs27771756,,,,0,,,,1,0,0,,,
S1L042256501,4,56412532,-,TTCTGTTTAAATTAGGAGGCTGGATTTTCATTAGACTTTTAGTAGGACCT,,G,T,1,,DBA/1LacJ,substrain,DBA/1LacJ,0,T,,,1,0,0,,,
gUNC7308283,4,56847919,+,TTGGCTATAGCTTCCCCTACTTTAACAAATCTTCCAACTGCCAAGTTGAC,,C,T,1,rs27869606,,,,0,,,,1,0,0,,,
gJAX00551855,4,57235215,+,CTCTGTTTTTCAAAGACAGAAGGTATCTGCCGGTGTGTGGCATAAAGGAG,,T,G,1,rs27869259,,,,0,,,,1,0,0,,,
SNJ042306793,4,57669827,-,CTTTTACAAAGTGACTAGATTAAGATTTGAATCAGCAAGTGAGATAGGCA,,C,A,1,rs27852408,NOD/ShiLtJ,substrain,NOD/ShiLtJ,0,A,,,1,0,0,,CC,CC
gUNC7322324,4,57756547,-,GGAATGGTAAAAGACATTCCAGACAGACACTCTGCCATTATTAGGTACAA,,A,C,1,rs27835371,,,,0,,,,1,0,0,,,
S6N042313661,4,57841528,-,CTGAGCCTGGAGGTGGGGACATCTTCTGAGTTTAAAAACCTTTCTTACTG,,G,A,1,rs239141286,,,,0,,,,1,0,0,,,
gUNCHS011421,4,58790645,-,CAGTGGTTAAGAGCACTCACTGCTCTTCCAAAGGGTCTATGTTCAGTTCC,,T,G,3,rs242275544,,,,0,,,,1,0,0,,,
gJAX00552186,4,58831312,-,TGACACCCTAAATTAAGAATTGCAGTGGCCTAACCTTCTGTTCTGTGTAG,,A,C,1,rs27848031,,,,0,,,,1,0,0,,,
SFR042356320,4,58908014,-,TTGTGGTAGTGTTCTGTGTTTGATGAGTAGAATGTATTTTTGGATAGAAT,,C,A,2,,FVB/NRj,substrain,FVB/NRj,0,A,,,1,0,0,,,
SBR042358271,4,58956799,-,GCAGGAGATAGATGGCGACGTGGGTCCTTCTCGGGTTCACCGCATTTCCT,,G,A,1,rs27885209,BALB/c,strain group,"BALB/cByJ, BALB/cByJRj",0,A,,,1,0,0,,,
gUNCHS011435,4,59448999,-,ATCCAAGATGGTTTTGGGAGCCTCGTGAACCTGTGGTAGGTGTAAGAGAT,,C,T,1,rs27850689,,,,0,,,,1,0,0,,,
B10040059880,4,59880414,+,ATAACGAATGACCTGGCATCAGACTCCCCAGGTTTGATCTAGGTTGATGA,,C,T,1,,C57BL/10,strain group,"C57BL/10ScSnJ, C57BL/10SnJ",0,T,,,1,0,0,,,
SNT042470609,4,61765243,+,ATCCTGATCATGATCCAGTTCATTATCATGGGAGAACTTTTCATGTTCTG,,G,A,4,,,,,0,,,,1,0,0,,,
mUNC040086047,4,62034295,+,ATAAAAGCAATGACCCAGGAAAGTTACTAATGAGGTTAAAAAAAAAAAAA,,G,A,1,,,,,0,,,,1,0,0,,,
gUNC7358610,4,62608978,+,TGATGGAATCTTCTTTTCATCAGGGAACAATGTTCATGGTATTCCTTGCC,,C,A,1,rs28322212,,,,0,,,,1,0,0,,,
S6N042511870,4,62796753,-,GCTGGAAAGTTTGGTGTAGGGTATGCCCAGTAGGGACTGAAGGGTGCATG,,G,A,1,rs234739684,C57BL/6,strain group,"C57BL/6NJ, C57BL/6NTac",0,A,,,1,0,0,,,
SAJ042514538,4,62863459,+,TGGGAACACAAACACCACTTGTGACTCAATTAAGGAAGTAGTAATTAAAA,,C,T,1,rs236780747,A/J,substrain,A/J,0,T,,,1,0,0,,CC,CC
S6Y042530203,4,63255088,-,GGAAGAGGATATGTCACTGAGGACCTGCCCAGATTGACGGCCATGTGATC,,A,G,1,rs27905478,,,,0,,,,1,0,0,,,
S6T042531356,4,63283914,+,GCATTGTCCCTGGCAGCCCCCTTCATGTGTGTCTCTCTGTTGCAGGGTCA,,G,A,1,,C57BL/6JBomTac,substrain,C57BL/6JBomTac,0,A,,,1,0,0,,,
S3C042531961,4,63299041,-,TGGCTAGAACTCAGACCTCATAGGTGCAGTGGGAACCCCTCTAGGCCCCT,,A,C,1,rs31787835,,,,0,,,,1,0,0,,,
gUNC7370285,4,63426153,+,TTCTGTCCAACCTTAGAGTAGTAACACGGTCAGCTTACAGGCTCGACCAC,,A,G,1,rs27920314,,,,0,,,,1,0,0,,,
S1H042538779,4,63469484,+,CAGATGCACCTTCTATATTCTTATGAAAGCTACCCTATGATGCCTGGGGT,,G,A,1,rs31919282,,,,0,,,,1,0,0,,,
mJAX00552844,4,64063988,+,GAAAGCCCGATTTGCACACTGAAGCCCATCCACTTCAATTGAAGATGATA,,T,C,1,rs27880884,,,,0,,,,1,0,0,,,
gUNC7383428,4,64397310,+,TAACTGTATAATAGTCTAGGGTGGCCTTGATATAAGAATCCTCCTGCTTC,,G,A,1,rs107971320,,,,0,,,,1,0,0,,,
B10040064487,4,64487244,+,TTACCCTGGAGCACACCAGAGCACTTAGTGATCTTTGCTGAAATGAAATG,,A,G,1,,C57BL/10,strain group,"C57BL/10ScCr, C57BL/10ScNHsd",0,G,,,1,0,0,,,
mUNC7391813,4,65127367,+,TGTCACCACTTTCACAGGAATCCCTGGTCACTGATCTCCAGAGCAGTCAT,,A,C,1,rs27886613,,,,0,,,,1,0,0,,,
mUNC041185462,4,65774092,+,AGCATCTTGTTGGCTTCTCAATCTCTCTGGGTAATCATGGCTCCTCTGGT,,T,C,1,rs27920233,,,,0,,,,1,0,0,,,
S1J042632480,4,65812018,+,CAGCAACCATTTTATATAAGTTCATGCAACCCATTGCACAGATGTACCAC,,C,A,1,,DBA/1J,substrain,DBA/1J,0,A,,,1,0,0,,,
D2R042641131,4,66028282,+,CTCCTTACTTACTTACTCACACCCAGCAGGAGAGGAAGACCCTTTTATAT,,G,A,3,,,,,0,,,,1,0,0,SPIKE,,
SFJ042645144,4,66128623,+,CTGATTAGATAAAAATAGTGAGGAGAAATTGTTTTCATGGTAAGTGGTCT,,A,G,1,rs27880995,FVB/NJ,substrain,FVB/NJ,0,G,,,1,0,0,,,
mUNC040514618,4,66236102,+,GTGGATAGGCAGAGGTGCAAACTATGGTGTCCAAACATCAGAATATGAGG,,C,T,1,rs27900827,,,,0,,,,1,0,0,,,
SS1042652705,4,66317644,-,GAACTCAATATTAATGTATCCATTTTTCTCAGTTAGTGTCAGGTTTCATT,,T,C,1,rs248609170,129S1/SvImJ,substrain,129S1/SvImJ,0,C,,,1,0,0,,CC,CC
S6J042655196,4,66379904,+,TCCCCTGTTCTGGGGCATATTTCTATCTCCTGCCATCTACCTCTTTTCTT,,A,G,1,rs31829148,,,,0,,,,1,0,0,,,
SBC042661161,4,66529045,-,GAAACAAAAAGATATTTCTGGTACTGAACATAAAATAACTGAAATGTAAA,,C,T,1,rs47792019,,,,0,,,,1,0,0,,,
S3J042673644,4,66841106,+,AGAAGGAGTGCCCCGCTTTCACCTCTGCCTTCACTACAGAGACTTTATTC,,C,A,1,rs3023006,C3H/HeJ,substrain,C3H/HeJ,0,A,,,1,0,0,,,
mbackupUNC040089799,4,67098252,+,TGGTGTGTTGCTTGTCATGAAAGTGTCCCTTATAATCCTGTAGGTAAGAT,,G,T,1,,,,,0,,,,1,0,0,,,
gUNCHS011562,4,67317398,+,TAAATTACTGGTTAGTTCATTCATTAATGTGTTTTTATGAATGCAGAACA,,C,T,1,rs32303200,,,,0,,,,1,0,0,,,
gJAX00120036,4,68016529,+,TTCTGTCAGACCCTTAACACATGGTTAGATGTAGCCACTCTGAAGCCTCA,,A,G,1,rs27874032,,,,0,,,,1,0,0,,,
mUNC040401940,4,68466000,-,ATCCTGGATCTCATCAGCCAAGACCTTCAGTTATCAAAAACTGAAGAACT,,T,C,1,rs108867230,,,,0,,,,1,0,0,,,
SBC042755888,4,68897201,-,AGGTATCTTGCAGTGTTGATTATTTAGAATTGATCTTCCAATTCCAAGAA,,G,T,1,,BALB/cAnNCrl,substrain,BALB/cAnNCrl,0,T,,,1,0,0,,,
gUNC7443378,4,69197709,+,CCCTGATGTGCTTTAGATTTCTTTGGTACTTTCCCTCATCCCTTAGACTG,,T,C,1,rs253285341,,,,0,,,,1,0,0,,,
DS4042791805,4,69795130,+,ATGGAGCCTGCTCCTTTAAGTTGTAATATATTGAGCATACAGTGTCCTGA,,C,T,1,,129S4/SvJaeJ,substrain,129S4/SvJaeJ,0,T,,,1,0,0,SPIKE,,
B10040070037,4,70037728,-,TCAGTTTTCCCACATGTAAAACGCAGGCTTTCATCTGCAACTTCAGGATT,,A,G,1,,C57BL/10,strain group,"C57BL/10ScCr, C57BL/10ScNHsd",0,G,,,1,0,0,,,
gJAX00120191,4,70099153,+,AAGAAAAGACCTGGCTCATGTTTGTACCCCAAAGGTCAGGACATTCAATA,,A,G,1,rs3023981,,,,0,,,,1,0,0,,,
S2T042804384,4,70109614,+,AGGGAACCCTGAGCTGGGTGATGATTTGGGTTTCTAGTTCAAATAAGAGA,,A,G,1,rs47219183,,,,0,,,,1,0,0,,,
ST2042807470,4,70186770,+,GTACCATCTCATGAGCTAATGTCCCAGACTGTATAAAAAGCTGAGTGCTA,,G,A,1,rs244342884,,,,0,,,,1,0,0,,,
gUNCHS011600,4,70397734,+,AGGGGACAGGGGGCTGGAGAAATGGCTTAGTGGTTAAGAGCACTGACTGC,,C,T,3,rs6360157,,,,0,,,,1,0,0,,,
gUNC7467228,4,71165061,+,GAATTTTATTTTTATAATATACCTATAATCTTCTTGTAAGCTACTTTGAT,,A,G,1,rs27856788,,,,0,,,,1,0,0,,,
gUNC7473478,4,71568617,+,TCTAAACCACTATCTGAAGAGTACACATGGTGGGACTCATGGCTCCAGAT,,G,A,3,rs241931595,,,,0,,,,1,0,0,,,
gUNC7479389,4,72108571,+,TGTTCATGGTGTTCTTTACAGCAACAAGAAACCGCAGAGAGACTGAGTGG,,A,C,1,rs27855599,,,,0,,,,1,0,0,,,
S2J042889695,4,72242396,+,TTCTTCTTCACTAGTTGCTTACCTTCCATGGAAAGAATGGGACAGAACAT,,G,A,1,rs46156030,DBA/2J,substrain,DBA/2J,0,A,,,1,0,0,,E3,Consensus
mUNC040122874,4,72605012,-,TTCTAAAACCAATCTAAAGGTTGTTGGGAGACACTAAACAACAACAACAA,,G,T,1,rs47695837,,,,0,,,,1,0,0,,,
gJAX00120452,4,73602269,-,AAACATTTAATGCCACTGCTACCTTTCATGTCTCCTGCATTCTGGACATA,,G,A,1,rs28022693,,,,0,,,,1,0,0,,,
SBB042966788,4,74169702,+,TCAAGCTATAATTGTACTCAGTTTACTTCAGATTAGGACCTGAAAAGCCT,,A,G,1,,BALB/cByJ,substrain,BALB/cByJ,1,,,,1,0,0,,,
gUNC7503701,4,74210917,+,CTACACAGTTGTAGAACATGAAAGAATCAATCTGGTACTTGAACTGGAAG,,A,C,1,rs52002613,,,,0,,,,1,0,0,,,
mUNC7508779,4,74598028,-,TCAGTCTGATCACAGCAGAATTTACCACCTGATTGAGGAGAACTTTTAGC,,G,A,1,rs28091234,,,,0,,,,1,0,0,,,
SBJ042986544,4,74663617,+,TAATTATAAGAATATTACTTGGGTTAAGGGCCTAAATGATCTATCTATTC,,C,T,1,rs215492320,BALB/cJ,substrain,BALB/cJ,0,T,,,1,0,0,,,
SBH042987275,4,74681880,-,AAGAATAGCTTTATAACTTCATGGCACAGTACCTGCAATTCCAAGTACTG,,A,G,3,rs224058156,,,,0,,,,1,0,0,,,
mUNC040130245,4,75084896,-,GACAGATCTTACTAACTGACTGGGACAGATTTCTTGTTGTCTTTATCAGC,,A,G,1,rs28050785,,,,0,,,,1,0,0,,,
SS1043023799,4,75594996,+,TCATCTAGGCGTTAGAACCCTGAGGAAGCTGGCACCAAGATGCTGGGACT,,C,T,1,rs28074189,129S1/SvImJ,substrain,129S1/SvImJ,0,T,,,1,0,0,,CC,CC
mJAX00120641,4,76193199,-,TCCTCAAGAAACAATGGTGTCTTCTTTCCCAGCAAGTAGTAGCTTCTAGT,,G,A,1,rs28034793,,,,0,,,,1,0,0,,,
B10040076195,4,76195245,-,CTGGCTTAGAAGGTGAAAGGGAGGATAAGTTGGTGAGCACTGAATCCTAC,,C,T,1,,C57BL/10,strain group,"C57BL/10ScCr, C57BL/10ScNHsd",0,T,,,1,0,0,,,
mUNC7528789,4,76372640,-,CTCAAAACAGCAGTGCTACTGTTGTACAAGTTGGCACATCTTGCCCAGAA,,A,G,1,rs50006097,,,,0,,,,1,0,0,,,
SFT043073624,4,76840614,+,ATTAATTGAACACTTTTTACGTTCCAACTTCCTAGCACTGAATCTTGAAA,,A,G,1,rs49477784,,,,0,,,,1,0,0,,,
gUNC7543548,4,77320388,+,AAAATGCATAACACCATTTTAAACAGAGCATGAAAATCAGACACTATAAA,,T,C,1,rs50660223,,,,0,,,,1,0,0,,,
gUNC7551931,4,77835198,+,TTATTCTTTTAAAATGCAATATTTTATTAATGGTATGATAAAATATTTGA,,C,T,1,rs49349581,,,,0,,,,1,0,0,,,
SS1043118843,4,77971090,+,TATCTTACTTTCAAACTCTTTCAGTTCAAGTTTTTCTGATAATATTACAC,,C,T,1,rs229035076,129S1/SvImJ,substrain,129S1/SvImJ,0,T,,,1,0,0,,CC,CC
gUNC7564038,4,78578775,+,GGACCAAGGGACTCTCTTCCCATTGATGCCAGACAAAGCCATCCTCTGCT,,A,C,3,rs244648877,,,,0,,,,1,0,0,,,
gUNC7565502,4,78663638,+,AATAGTAAAATACAGCCATTTTATTTAATTTGTAAATTTTTGTTCCTCTT,,T,C,1,rs26839506,,,,0,,,,1,0,0,,,
S3J043148304,4,78707600,-,CATTTTCCCTCATGTTTATAAGCAGGAGTATTAAGTGCCCAAAGGAAATA,,T,G,1,rs264599314,C3H/HeJ,substrain,C3H/HeJ,0,G,,,1,0,0,,,
SAC043168573,4,79214345,+,ATGAAGGTTTTCTAAGGGATGTTCAGGCATCAGGAAAAGAGAACAACATT,,G,A,1,,A/JCr,substrain,A/JCr,0,A,,,1,0,0,,,
gUNCHS011721,4,79330077,-,AGGAATCAAATAAGACCCACAAATAACCCCACACACCTAGGGACACTTGA,,A,G,1,rs257002337,,,,0,,,,1,0,0,,,
S3T043177610,4,79440252,+,CTGGCATCTATGTAGAAGATGTGGTGCTCTGAGTTACAGAGACAAAGTTC,,G,A,1,rs32274213,,,,0,,,,1,0,0,,,
DP3043183723,4,79593097,+,GAGCTAACTCAAAGGAAAGGGGAATGAAAAGATATGCCAAAGTCAACCAT,,G,T,2,,129P3/J,substrain,129P3/J,0,T,,,1,0,0,SPIKE,,
gUNC7580591,4,79822356,+,GGCTACCTGCCTATGACCTGTACACATGGAAAAGTGAGTATATGGGAAAA,,G,A,1,rs28050209,,,,0,,,,1,0,0,,,
S2C043196764,4,79919105,+,GACTTGAGATCCTCTTAAATCCATTGTAACTGTGCCATTATTTCAATGGT,,T,C,1,,DBA/2,strain group,"DBA/2NCrl, DBA/2NTac",0,C,,,1,0,0,,,
gUNC7591097,4,80546352,+,TCCTACAGGGTTGCCCTACCTTTCATCTCCTTCTATCCTTCCCCTAGTTC,,C,T,1,rs50437944,,,,0,,,,1,0,0,,,
gUNC7598588,4,81076245,+,TTCCTTTTATGGGGTTCAACAAGAGTTTAGTCACCAGTGGTGGAATTTCA,,A,G,1,rs28093658,,,,0,,,,1,0,0,,,
B10040081723,4,81723103,-,GCCCGGGGGCCTTGTGGATGTACATGGCCCATGTTACCTCAAAGACCCAC,,C,T,1,,C57BL/10,strain group,"C57BL/10ScCr, C57BL/10ScNHsd",0,T,,,1,0,0,,,
mbackupUNC040157393,4,81986930,+,ATATGGTGCTAATGACGGGAAAATCCTGAAACTTGGGCTGATTCAACCAC,,G,A,1,rs46317012,,,,0,,,,1,0,0,,,
mJAX00555843,4,82550855,+,AGCACCTGGCTGTGTGCAGCAGGACAGAAAGTCGGCTTCTCCTGGGAAGC,,A,G,1,rs28090337,,,,0,,,,1,0,0,,,
mUNC040626133,4,82858284,+,AGTCAAATTGAATTCTGGAGGTCTTTCTTTTGTTTTTTTTTTTTTGTTTT,,G,T,4,,,,,0,,,,1,0,0,,,
S2J043320840,4,83021024,+,TAACATGCTCCTTCCATTCAGATTCAGACAAGGAGGCCTTTCAGGCAATC,,G,A,1,rs28089606,,,,0,,,,1,0,0,,,
JAX00555961,4,83201963,+,ACTGTGTTGGATTCAGCTTTTACTTCCTGCCTTGGAGAGACACACACTGC,,A,G,1,rs28324859,,,,0,,,,1,0,0,,,
S6J043337572,4,83439314,+,TGCTGAAGCACGGTGTGATTCACTCACTCACCAGCAGCTTCTAGCACAGG,,G,A,1,,C57BL/6J,substrain,C57BL/6J,0,A,,,1,0,0,,CC,CC
gUNC7630359,4,83619386,-,TTTGAAAGTTCACATGCATATGAATAACATTAATTCCATTACTGTCACTA,,A,G,1,rs28064770,,,,0,,,,1,0,0,,,
SBJ043363012,4,84075314,+,CCTGTACTTTCTGTCAGCTTCCACACACCTGAGGCAGCAGTCCTCAGATG,,C,A,1,rs249586333,BALB/cJ,substrain,BALB/cJ,0,A,,,1,0,0,,,
SFT043369012,4,84225321,-,TTACATGTCCCTGTCTATGACCTTAGAAGATTTCATTTTCCAAAAGAAAC,,C,A,1,rs28087499,,,,0,,,,1,0,0,,,
DS6043371536,4,84288403,+,AACTTCTTCATGGGGCATATCGATACTTCTACAACCCAGCCTGCTGTTCC,,C,T,1,,129S6/SvEvTac,substrain,129S6/SvEvTac,0,T,,,1,0,0,SPIKE,,
S2C043372632,4,84315819,-,TGTTCTCCAAGTCTTCCCCAGCAGGTGCTGTTCTTACTAAACCCAGGACC,,G,A,1,,DBA/2NCrl,substrain,DBA/2NCrl,0,A,,,1,0,0,,,
S6T043373478,4,84336951,-,ATTCACAGGAGTGAATTCACACCAGTGAGTCATCTGTGGAGGGACCTGAG,,T,C,1,,C57BL/6JBomTac,substrain,C57BL/6JBomTac,0,C,,,1,0,0,,,
gUNC7639816,4,84347849,+,TCATCATGGCTGTCTTGTCTGTCTTAAGGGGGACAGGACTCTCCTAATCA,,G,A,1,rs52316188,,,,0,,,,1,0,0,,,
gUNC7643110,4,84627762,-,CTTACTGGAAGTGTCTTGCGTATTGTTCAAACACAAGGGACAACTGGCTT,,A,G,1,rs28066092,,,,0,,,,1,0,0,,,
B10040084693,4,84693699,-,AAAGCGTTTATTTTAGATTATGGCTGGAATTCATAGAAGCCAGGGTAAGA,,A,G,1,,C57BL/10,strain group,"C57BL/10ScCr, C57BL/10ScNHsd",0,G,,,1,0,0,,,
S3J043395159,4,84878981,+,TAGTTACCTGAATTTAGAGTTGTTTCTACCTGGATACATGTTTTAAACTA,,G,A,1,rs28063635,,,,0,,,,1,0,0,,,
S3T043409125,4,85228149,-,TATAAAATTCTCCCTAATGCTGCAAGCATGAGTTTCTGTGCAAGGAGAGG,,G,A,1,,C3H/HeNTac,substrain,C3H/HeNTac,1,A,,,1,0,0,,,
S1J043417916,4,85447910,-,ATATCCTGTCTCCAGTACCATCCCAACTCTTAGGGATATTTTCCAATGTA,,G,T,1,,DBA/1J,substrain,DBA/1J,0,T,,,1,0,0,,,
gUNCHS011881,4,85491157,+,CATATTCTCTTCCTCTTCTCCTCTGAGTGGGTGGGACACCTCTAGGTATC,,A,G,1,rs32637613,,,,0,,,,1,0,0,,,
S6J043436429,4,85910730,-,CAGAAAGCAAAAGAGCTATGGTCTGGAATGTGAAGGATGAGAGTCAGGAG,,T,C,1,rs51153398,C57BL/6J,substrain,C57BL/6J,0,T,,,1,0,0,,CC,CC
SBJ043437994,4,85949860,-,GGTAGTAAGCTATTTATCCCCATTATTATTCATGCAATAAAGCAATATGT,,G,A,2,rs221961818,,,,0,,,,1,0,0,,,
gJAX00556703,4,86239878,+,AAGAAGCCAAATGGTGGGTGGGTGAGAGAATGACAGTACCTTAGAAAGGA,,T,C,1,rs28032505,,,,0,,,,1,0,0,,,
gUNC7668854,4,86485246,+,TAACCTTTCCAGAAGCCAGGTGGGGTTTGTGTCTGGACTTAATCACCAAA,,C,T,1,rs28083066,,,,0,,,,1,0,0,,,
DFR043459946,4,86498671,+,TATACTCAGTCTTCCATTGACACAGAAAATATCCCAGCACATACCAACAA,,G,A,2,,FVB/NRj,substrain,FVB/NRj,0,A,,,1,0,0,SPIKE,,
S3J043481565,4,87039133,-,AGGAGGAACTCTGAGGGTTACTGATATTTGAAAAGTTCCCTAGGGGTTGT,,C,T,1,rs247892384,C3H/HeJ,substrain,C3H/HeJ,0,T,,,1,0,0,,,
gUNC7677604,4,87118837,-,CCTCGCAAAGGTGAGCTTTCTGAGATGCCATGCATTAGAATTTCAGAATG,,G,A,1,rs28079368,,,,0,,,,1,0,0,,,
mUNC041313104,4,87846362,+,CTGAAAATTAAAATTATCAACCTGAATAATTCCCTATGGCAAGGGCAAGG,,G,A,1,rs28097355,,,,0,,,,1,0,0,,,
SBT043527032,4,88175820,+,CATGCCTTTATTGCCTTGTTCTGTGTGGTTTGGTAAATGTTTGCTTTTTT,,T,C,1,rs28082185,,,,0,,,,1,0,0,,,
DZO043528907,4,88222686,+,CTCTTGCTGTATTTGTGTCTGCTTAGGTTAACTGTAAACATCACCTCTTG,,T,C,1,,,,,0,,,,1,0,0,SPIKE,,
S6N043537931,4,88448280,+,AACTGGCCAGTGATAAACAATGTCACACACAAACAAATAGAAGAAGAAAT,,T,G,1,rs224916824,C57BL/6NJ,substrain,C57BL/6NJ,0,G,,,1,0,0,,,
gJAX00121562,4,88513304,+,GACACCCTGGTTAGCATTCTTGAAAGTTCTGGGAACACGGAAATTATTGA,,G,A,1,rs32940866,,,,0,,,,1,0,0,,,
SBB043578507,4,89462685,-,TTTAATAGTGCTGGAGATTGAATGAAGGCTTTGTTCATGCTAGGCAAGCA,,G,T,2,,,,,0,,,,1,0,0,,,
gUNC7706339,4,89573018,+,AGGAAGAAGAGAGTGGGAGCATAATTGTATAGACTTTAATTCCAGCAGGG,,T,C,1,rs28160799,,,,0,,,,1,0,0,,,
SSH043584994,4,89624859,-,TATGGGAATGGGTGGGTAGGGAATTGGGGTAGGGTTTGGGGGACTTTTGG,,C,T,3,rs31926037,,,,0,,,,1,0,0,,,
gUNC7713382,4,90248570,+,TAGGACATACATATGAGGAACATAGCAATGACAAACATGAGAAGGCACAT,,T,C,4,rs6316564,,,,0,,,,1,0,0,,,
gUNC7722464,4,90978117,-,AAGGTTGATACCCTTTGTATACAAACATATATTAAAATTGAAGAAAAACC,,G,A,1,rs238420104,,,,0,,,,1,0,0,,,
DS6043644040,4,91101006,-,GGATATGATGGAGCATCAATCGCACTAAGATGTGAGCATGTGTCTTACCT,,T,G,1,,129S6/SvEvTac,substrain,129S6/SvEvTac,0,G,,,1,0,0,SPIKE,,
SS1043649034,4,91225856,-,AGAACATTTTAAAAAGAACACCTCATGACCCAAAAACCTAAAGTATTGAT,,A,C,1,rs28144268,129S1/SvImJ,substrain,129S1/SvImJ,0,C,,,1,0,0,,CC,CC
SBR043649829,4,91245729,+,CAAATGATATTTTCAAAGAACTTTGAAAACATCAGATATACTGCTTACCA,,G,A,1,,BALB/c,strain group,"BALB/cByJ, BALB/cByJRj",0,A,,,1,0,0,,,
B10040091345,4,91345828,-,AAGACAGATGGAGAAAAATGCGAGGCTTAACTTTTGTCTTTGGAATGGTA,,G,T,1,rs215354806,,,,0,,,,1,0,0,,,
gUNC7729303,4,91548043,+,CTAAAAAGTTTAATACAGAGAATTCTTTAGAGTCCTGATATGTCAACCTG,,T,G,1,rs28121229,,,,0,,,,1,0,0,,,
mbackupUNC040532754,4,92347911,-,CCTCCTCTCCTAGGTATATCTAGTTCATATTAGGATGATAATAAATTTAA,,G,T,1,rs32678494,,,,0,,,,1,0,0,,,
SNT043712487,4,92812193,-,TTCTCATTGTGTCCTGGATTTCCTGGATATTTTGAGATAGGATCTTTTTG,,G,T,3,,,,,0,,,,1,0,0,,,
gUNC7746435,4,92939232,+,GTCAAAAGCCTAAAATATTTCATCTTTCATAAATTCTGTACCACATCCCA,,T,C,1,rs28120926,,,,0,,,,1,0,0,,,
gUNC7753338,4,93505714,+,TAAATTAGATTCTTCACCAATCCTAGGCAGTCAGTCTTTGAGCCAACCCT,,G,A,1,rs238324163,,,,0,,,,1,0,0,,,
gUNC7754999,4,93646063,+,TATTCTAGGACTCCCAGTGGATTCCTGAAACCTCAGATGGTATGTGTACT,,A,G,1,rs46529973,,,,0,,,,1,0,0,,,
SFT043758697,4,93967427,-,GTGTCAGTGCCTAGTAAGATTTTCTGCAGAGAAAATTGTCTTGATTGCCT,,T,C,1,rs28139244,,,,0,,,,1,0,0,,,
gUNC7761564,4,94213806,+,CTTCTAGAACTGTATGAAAACCTTGACCTTAGTTTTAACATATGGCCTTA,,A,G,1,rs49462328,,,,0,,,,1,0,0,,,
SBC043799928,4,94998208,-,AAGTTAAGAATGGGATGGACAATGATCAGGTCATTTCAAGAATGATGATG,,C,A,1,rs32397284,,,,0,,,,1,0,0,,,
gUNC7770640,4,95089661,-,CTTGGTATGGTGGTTTGAATAAGAATGCCCCCACCCCCATAGGCTCATCT,,T,C,3,rs51902870,,,,0,,,,1,0,0,,,
S2H043805400,4,95135016,+,TACAAAACAATGTCAGGTTCTTTCCTCATATGAAAAGAGACTCTGTAGAG,,T,C,1,rs28162712,,,,0,,,,1,0,0,,,
D6R043817813,4,95445349,+,CTTACTGCTATTGGAAATTCCTGAGGACTGCCCTTGGAGGAGAGTTCTAT,,T,C,1,,C57BL/6NRj,substrain,C57BL/6NRj,0,C,,,1,0,0,SPIKE,,
S2R043822505,4,95562634,+,AACACATATGTGTTTGTACATTCTCCCTCATGTATACACACATGTGAACA,,T,C,2,,DBA/2JRj,substrain,DBA/2JRj,0,C,,,1,0,0,,,
mJAX00558461,4,95571566,+,AAGGGAACTATGCAAAAATGAGGCTAGACTGGAGGTATGAGCAGTAGAAC,,G,A,1,rs28306804,,,,0,,,,1,0,0,,,
S3J043825714,4,95642862,+,TGTATTCTTATAAAGAGTTGCACGTTGAGGGAAGCTCACTGGGAGCTGTG,,T,C,1,,C3H/He,strain group,"C3H/HeNCrl, C3H/HeNHsd, C3H/HeNRj, C3H/HeNTac",0,C,,,1,0,0,,,
gJAX00122133,4,96135945,+,AGCTAACTGACTCCTCACTATCAGTGTGTAGTACAAGAATTTGCTGCTTG,,A,G,1,rs28122102,,,,0,,,,1,0,0,,,
UNC7788401,4,96479102,-,CTGGACCACATCAAAAACTTTTCAGCAACTGGGAAAAACTGAAATTGTTT,,A,C,4,rs28090690,,,,0,,,,1,0,0,,,
gUNC7793379,4,97001352,-,TTCTAGTATTTAGTCTCCTTTTCCAGAATTTACTTCCTAGGAAAATGCAA,,T,G,3,rs108840239,,,,0,,,,1,0,0,,,
B10040097621,4,97621114,+,AAGTCAACTGAACCATAAAATCAGTGAAAACAAGGTTGAAGACCAAACAG,,T,C,1,rs32525264,,,,0,,,,1,0,0,,,
S6J043909105,4,97727625,+,TCCTCCATTTGAAGGCATATGCTATAAGGGTTTTTAATTGTTTGTATTTA,,C,T,1,rs6390923,C57BL/6J,substrain,"C57BL/6J, C57BL/6JEiJ",0,C,,,1,0,0,,E2,E3
gUNC7803077,4,97758260,+,CCAGAATAGGCTTCGTCTGACTTCTGCTTAACAACCACTAGATGCGGAGA,,A,C,1,rs28110089,,,,0,,,,1,0,0,,,
SS1043912531,4,97813299,+,GCATGAGTCAGCACTTCATTCTCATCTGGGCACTCATAAAACAATCTACA,,T,C,1,rs213210544,129S,strain group,"129S1/SvImJ, 129S2/SvHsd",0,C,,,1,0,0,,,
DS4043923083,4,98077084,-,GACTTGTCTCATTTCATCAAAGACACCGACTCCATGGAAGTGGTGAACAC,,C,T,2,,129S4/SvJaeJ,substrain,129S4/SvJaeJ,0,T,,,1,0,0,SPIKE,,
mJAX00122280,4,98092080,-,CCGGCTGTGCTAATCTTGTATGAACACCAGCAAAGAGGTGTTAGAGATCA,,A,G,1,rs28078486,,,,0,,,,1,0,0,,,
gUNC7815041,4,98732958,-,AAGGGTCACTAATGTGATGTGCTCCTGGAGATGCTAACAAGGAAAAAAAG,,A,G,1,rs32769435,,,,0,,,,1,0,0,,,
S2T043965137,4,99128425,+,ATGTGGGACTATCTGGGACACACTTTTGACACACTTGAGACAGAGGTAGC,,T,C,1,,DBA/2NTac,substrain,DBA/2NTac,0,C,,,1,0,0,,,
gUNCHS012136,4,99329262,+,TCATTGTCTCTCAGCTTCCTGGACATTATGAGGTGAGGAGTTTCAACCCA,,C,T,1,rs28093795,,,,0,,,,1,0,0,,,
SS1044000384,4,100009609,+,AGTAAGTAATGAAGGCCCCAGATTAATCTTGCTTGTCTCTTCTTTCCCAC,,A,C,1,rs28149362,129S1/SvImJ,substrain,129S1/SvImJ,0,C,,,1,0,0,,CC,CC
gUNC7836639,4,100371257,-,TCTCTAAGTGGACCTGTGCTTTGCACAGATAATGGTTTCTGGCTGCCCAG,,A,C,1,rs49839715,,,,0,,,,1,0,0,,,
SFT044029681,4,100742048,+,GTCCATCACTGAGGGAAGTCACCTAGGGAACTCAAGGCAGATGTATCTTG,,C,T,1,rs213608327,,,,0,,,,1,0,0,,,
gUNC7847645,4,101135742,+,CCAAATATGGAAGTATGCAAATTGCGATGATTAGGCATTTTTAAGTACTG,,G,A,4,rs248426882,,,,0,,,,1,0,0,,,
gUNC7852981,4,101546954,-,AGACTGTACTGCATTGCCCCTGACTGTGCCAGACTGTGCCACCCTTCTAC,,G,A,1,rs32444130,,,,0,,,,1,0,0,,,
S1L044068370,4,101709259,+,AACTGTTATTTGTTTGACATGAGAGAATAAATAAACTCAAGAATTTCCTT,,C,A,1,,DBA/1LacJ,substrain,DBA/1LacJ,0,A,,,1,0,0,,,
S3T044075214,4,101880358,-,TATAAGAACAAGGGCTCAAGGAATAAGAGGTTAGGTAAAATCAACAGGCA,,G,A,1,,C3H/HeNTac,substrain,C3H/HeNTac,0,A,,,1,0,0,,,
gUNC7862387,4,102281427,+,AAGGGCAGTTGTCTAATAACCTCTAGTCACTGACTGTGTGACCACCGATA,,C,T,1,rs31994013,,,,0,,,,1,0,0,,,
mUNC7870224,4,102815696,-,TAGACCAGGCTGGACTAGAACTCAGAAATCCCCCTGCCTCTGCCTTCCAA,,A,C,3,rs47430764,,,,0,,,,1,0,0,,,
gJAX00122682,4,103436482,-,GTGAGTTCTTTCACTATTAAGGAAGGACAGAGGTTGGTAAGCCTATTGAA,,T,C,1,rs28198191,,,,0,,,,1,0,0,,,
B10040103793,4,103793810,+,GTGAGGGAAGGAGAGTGGTGCCGTTTAGTGGAAACGACATTCATAATACA,,A,G,2,,C57BL/10,strain group,"C57BL/10ScCr, C57BL/10ScNHsd",0,G,,,1,0,0,,,
gUNC7883528,4,103815080,-,CAGTTCTCTGGTTTTTGTTTTTAAGTTACAAATTCAACTCAGGAATAAGA,,C,T,1,rs28157241,,,,0,,,,1,0,0,,,
S3R044178484,4,104462122,-,TGAAACAAATGGTTGTAAGAAAACAACAGGGCCATGCATAGGTGAGGTTG,,G,A,2,,C3H/HeNRj,substrain,C3H/HeNRj,0,A,,,1,0,0,,,
D1H044179556,4,104488902,+,GAAGAACTTTGCCTCCTGAGGTTCTTGTTATGTGACATTCAAAAGTGTTG,,C,A,1,,DBA/1OlaHsd,substrain,DBA/1OlaHsd,0,,,,1,0,0,SPIKE,,
mbackupUNC040545931,4,104909939,-,GCAGCCAGCCTGTTTGCCATTTCTTTCAATGTTCAAGAAATACCAAACAA,,A,C,1,rs28166741,,,,0,,,,1,0,0,,,
gJAX00122831,4,105445591,+,GGGTTTCCTCCTTTTAATTCTGTTTTCTTATTAAAGGGATCAGGCCACAC,,A,G,1,rs28169629,,,,0,,,,1,0,0,,,
gUNCHS012287,4,106069363,+,GAAGCCTGGCCTTGTCTGGAACGTGAAGGACATTTTCTCCTTTTGGTTCT,,C,T,1,rs28153046,,,,0,,,,1,0,0,,,
SFH044247545,4,106188649,+,TAATGTTATACCAACAATGAGTTTTATATTGATACTATTAGAGTGAGAAA,,G,A,1,rs28135810,,,,0,,,,1,0,0,,,
gUNC7918981,4,106299513,-,TTTCCAAGATGCGTTCATATTCATAGGGCCTCTCCTCACTGCAGGGTTCT,,T,C,1,rs13477893,,,,0,,,,1,0,0,,,
DX1030271181,4,106553947,-,TTGCCATTTCTCATACATTTCAGCCATGCAAGGCTTAGACAAAAAATGCT,,T,C,1,,129X1/SvJ,substrain,129X1/SvJ,0,C,,,1,0,0,SPIKE,,
SBT044264560,4,106614002,+,TTACAACTACAAAGCTGATCAACTTCCTCGCTATGCTGTGAACAGGCTGG,,A,G,1,rs248103353,,,,0,,,,1,0,0,,,
JAX00561321,4,107161181,+,ATGAAACCCCCAGTAGAGAGGAGACAGGAACTCAGCACTGTCTAAGCTTG,,C,A,1,rs28308042,A/J,substrain,A/J,0,A,,,1,0,0,,CC,CC
gJAX00561354,4,107318437,+,ACTGGCATGGATCTCGCTGTGCAAAGAAAGGAAGCACACTAGTCCCTAGC,,A,G,1,rs28147364,,,,0,,,,1,0,0,,,
mUNC7939797,4,107787388,-,CCCAGTTCATAACAGGGTTCAAAAACAGTAACACCGGTGCCTGCTGATAG,,A,G,1,rs47000653,,,,0,,,,1,0,0,,,
B10040108217,4,108217297,-,CGGCGAGCCCGAGGGTGACTGGGTCTACACTAGAACTTAGTGATCTTGGA,,A,C,1,,C57BL/10,strain group,"C57BL/10ScSnJ, C57BL/10SnJ",0,C,,,1,0,0,,,
D2H044330963,4,108274099,+,TAAGTAATGAGATCTATGCCTTTGACAAGTGCAAGAAGCACCCTTTAAGG,,C,A,2,,DBA/2JOlaHsd,substrain,DBA/2JOlaHsd,0,A,,,1,0,0,SPIKE,,
gUNC7947729,4,108419450,-,CCCTGACCTGTGGAGTGAGGGCTATTATGGTTGGAAAGACTAAATGAAAG,,A,G,2,rs224792130,,,,0,,,,1,0,0,,,
gUNC7953854,4,108977421,+,TTTACTCTCAGCACTCGGGAGGCTGACAGAGGTAGATCTCTCTATTTGAG,,G,A,1,rs33031293,,,,0,,,,1,0,0,,,
S6Y044374759,4,109368996,+,TGATCCTTTCAAGGATGATCCTTTTGGAAAAATTGGTCAGTATATTTTTG,,C,T,1,rs28151231,,,,0,,,,1,0,0,,,
gJAX00561819,4,109489877,-,CTTCTCCCATATTTTGTTAGTCAAAGCCACGGAGTCTGATCAGATTCTAG,,T,C,1,rs28131906,,,,0,,,,1,0,0,,,
S3N044389829,4,109745727,-,TAATTATTAAAATCCAGAAATCAGAGGTATTCTCAAATTTGGCACCAATT,,C,T,1,rs28164891,,,,0,,,,1,0,0,,,
DFT044390305,4,109757629,+,GTGCCCTGCAGGAATCATTAAATCAAAACTTCATGCTGATCATCACCCAC,,C,A,1,,FVB/NTac,substrain,FVB/NTac,0,A,,,1,0,0,SPIKE,,
S1J044404914,4,110122858,-,AGCTGATGGGATTAAGACCTGATGCTGAGATTCCTACTGTTTTTTGTCTT,,T,G,1,,DBA/1J,substrain,DBA/1J,0,G,,,1,0,0,,,
gUNC7966272,4,110344547,+,TTTATTAACTATCCACTAACTAGAGTCTAGGACCTAGTACAGGACCAGGG,,T,G,1,rs213439309,,,,0,,,,1,0,0,,,
gICR5473,4,110869554,-,GTATCAAAGTAATTGTGGCTTCATAGAAAGAATTGGGTAGAGTACCTTCT,,T,C,3,rs220497745,,,,0,,,,1,0,0,,,
SBJ044442934,4,111073371,-,TCCAGCCTATCGTACTCTATCATAGTAGAAGAAAATGCATCACAATAGGA,,C,T,1,rs251096271,BALB/cJ,substrain,BALB/cJ,0,T,,,1,0,0,,,
gUNC7975969,4,111366372,+,CTTTGATAAAGACCTGAAAATATGATTTTATTAAGGATGAGGGCTCCAAC,,G,A,1,rs46048073,,,,0,,,,1,0,0,,,
S2J044457614,4,111440364,-,GTTACAGCAGTGTTAGCAATCCAGCTCTGAAGAGCCAAGACAGATATGCA,,C,T,1,rs28270502,DBA/2J,substrain,DBA/2J,0,T,,,1,0,0,,E2,E2
DNT044460624,4,111515614,+,GCATTGGCTGGTTTATTTTCTTAGAGCCCAGAACAATTCGGCTTCCCTCT,GCATTGGCTGGTTTATTTTCTTAGAGCCCAGAACAATTCGGCTTCCCTCA,A,T,1,,NOD/MrkTac,substrain,NOD/MrkTac,0,T,,,1,0,0,SPIKE,,
S6Y044461889,4,111547241,+,GACTTCCTTGTAAGTCAGCATCCAATTGCCCGTGTCCTACGAGAACATTT,,A,G,1,rs27535996,,,,0,,,,1,0,0,,,
gUNCHS012429,4,111652215,+,AACTATTGCCTCTTTACCTGGATCTTAAATCTTTCTTCTAGGACAGCTTG,,C,T,1,rs27500396,,,,0,,,,1,0,0,,,
SBR044466521,4,111663033,+,AAGAACTCACTGAACCACAAAGACCCATCAACCCCCTTTTAAAGACATGG,,C,T,1,,BALB/c,strain group,"BALB/cByJ, BALB/cByJRj",0,T,,,1,0,0,,,
gUNC7985769,4,112657372,+,CCTCAAGACTCTAATCTTGAGCCTACTTATCTAAGTCAATCTATAGCACT,,G,T,1,rs217602794,,,,0,,,,1,0,0,,,
gsanger2874q,4,113384346,+,ATTTTTTAAAAAGAAACTGTCAAAGAAAATCAAAAGATCTAGTTATTATT,,C,A,3,rs231531933,,,,0,,,,1,0,0,,,
gUNCJPD001917,4,113428529,+,AAAAAAAACTCACAAGAATAGTTAAGTTTTTAAAGTCTTGTGATACTGAA,,G,A,2,,,,,0,,,,1,0,0,,,
mbackupUNC040653449,4,114539868,+,GCCTTTGTTTATTTTCAGAGTCGTCTCCTCACTTCCCATCTCCATCTTGA,,C,T,1,rs27480626,,,,0,,,,1,0,0,,,
D3C044597725,4,114943132,+,TCAACAAAAAGTTGGACTCACACAGTGAGGTACAATGAGAGAGCCACAGT,,C,T,1,,C3H/HeNCrl,substrain,C3H/HeNCrl,0,T,,,1,0,0,SPIKE,,
mUNC040260326,4,115058286,-,TGACTACCTCTTCATTTTCTTTCCCTACCCCAAACCTGGCAAGTTAGGGG,,T,C,1,rs51966632,,,,0,,,,1,0,0,,,
gUNC8040300,4,115966444,+,TTTGGCTATGTATATTTATGAAATGGATTTTTAAAGAGTAATGAGAGGTT,,T,C,1,rs31870986,,,,0,,,,1,0,0,,,
gUNC8048317,4,116750875,-,AAAAAAGGGGGGGGGGGCTGAGATGGCTCAAAATGCAAGAGCACTGACTG,,G,A,1,rs52263933,,,,0,,,,1,0,0,,,
gUNC8057040,4,117467464,-,AATCATAGTTGTTTGGCCCTGTAAATCATTTGACTTTCACGTAGCCTGGC,,A,G,1,rs47089199,,,,0,,,,1,0,0,,,
B10040117767,4,117767805,+,AAATAAGCCCTACTTGTGGACACCTTGCGGATTTTTTGTCTTCCTGGGAC,AAATAAGCCCTACTTGTGGACACCTTGCGGATTTTTTGTCTTCCTGGGAG,C,G,1,rs235892071,,,,0,,,,1,0,0,,,
gUNC8061889,4,117930173,-,CATCTTCGTGATGAACTCCAGACTAGTTGGTAGAACAATTCTGATCATGG,,G,A,1,rs28256553,,,,0,,,,1,0,0,,,
DP2044741869,4,118546739,+,TGGATGACATAGTGGGTATTAATCCTGCCATTCTGCAAAGCATTATGAAC,TGGATGACATAGTGGGTATTAATCCTGCCATTCTGCAAAGCATTATGAAG,C,G,3,,,,,0,,,,1,0,0,SPIKE,,
mUNC040558420,4,119268227,+,AAGGCGCTGCCATGCCATCATTAGGTTACTTGAGATCTGACTTTTAAAAT,,A,G,1,rs27493917,,,,0,,,,1,0,0,,,
SFT044772682,4,119317070,+,TCACTTACCATGGAAAGCAGGCCTGGAGCAGAGTGTCTAAGTTTAAAATT,,T,C,3,rs27493797,,,,0,,,,1,0,0,,,
gUNCHS012600,4,119897697,-,CAGGAGGGACTTACATCACACATTCAAGGCTGAGAACGAAAATGGCTTTT,,T,G,1,rs27501943,,,,0,,,,1,0,0,,,
gUNC8096793,4,120470104,-,GGTCTATCTCTGAACTATATCCAAAGTCTGTGGCTATAGTTTTTGAATGA,,T,C,1,rs32866440,,,,0,,,,1,0,0,,,
DBT044839830,4,120995753,+,TCTATATTCCAACAGTGGCATCACTTTCTCCTAAGATTGTGACAGCAGTC,,A,G,2,,BALB/cJBomTac,substrain,BALB/cJBomTac,0,G,,,1,0,0,SPIKE,,
mJAX00564025,4,121006873,+,GCAGCCATAACTTGGCAAGCTTTGCCTTTATATGGAGCAGTGACGTGCCT,,T,C,1,rs27518111,,,,0,,,,1,0,0,,,
SS1044881525,4,122038139,-,ATGTTGGTGGTCTGGGGATGGGGTTCCAATACAGGTTCCAAAACCAGAAA,,G,A,3,rs239395832,,,,0,,,,1,0,0,,,
gUNC8114713,4,122605058,-,GAACTCAAAGCATAGAAATAGGAGCATGGGAAATGCAAGGCTATGCTTGG,,G,A,1,rs32584677,,,,0,,,,1,0,0,,,
SNJ044910149,4,122753737,-,GACAAAAAGACCACCAAAGATTGGGAAAGGATCTTTATCTATCCCAAATC,,C,T,4,,,,,0,,,,1,0,0,,,
B10040122873,4,122873744,-,CCTGCACATAGAGAAGATGAACAGAGATTGTATTGTCTGGTGAGCTGCTT,CCTGCACATAGAGAAGATGAACAGAGATTGTATTGTCTGGTGAGCTGCTA,A,T,1,rs28258136,,,,0,,,,1,0,0,,,
gUNC8121148,4,123158750,+,CTGACAAGAGTCATGTATACTAGGCAAATTCAATATGTAGCAGAAGATAA,,C,A,1,rs47045346,,,,0,,,,1,0,0,,,
S2C044931522,4,123288073,-,GAGCTGAATATATAAGCAACCACCATATAAAGGTTACAGAGTACAGATCA,,G,A,1,,DBA/2,strain group,"DBA/2NCrl, DBA/2NTac",0,A,,,1,0,0,,,
DAH044932570,4,123314274,+,ACCTCCTTCTTGTTACAACCCTAGGCTTTGTCAGATGACAGTGTGGATAA,,C,T,1,,A/JOlaHsd,substrain,A/JOlaHsd,0,T,,,1,0,0,SPIKE,,
DAC191245041,4,123346184,+,CACAACCACACACACTATAGATCTTACCCTCTCTACCAACATCTTTCTTA,,T,G,1,,,,,0,,,,1,0,0,SPIKE,,
gUNC8127141,4,123759683,+,TCCTGGAACTTACTCTGTAGACCGGTGGCTGGCCTTCAACTCAGAAATCC,,A,G,3,rs237184424,,,,0,,,,1,0,0,,,
gUNC8134268,4,124273009,-,TCCTAATTTGTACTATAAGCCAGAGGTGGAAGGCTTAGGGCTGGAGAGAT,,T,C,1,rs49553263,,,,0,,,,1,0,0,,,
S2C044982862,4,124571557,-,CCAAGCAGATCCCACTGCGTTCCTTTAAAACTACTCATGCACAGAATACA,,G,A,1,,DBA/2NCrl,substrain,DBA/2NCrl,0,A,,,1,0,0,,,
gUNC8145139,4,125028416,-,TGCTGGCCTCCAGAGTGCTGGGATTAAAGTGTGTGCCACTTCCAGTGTGG,,G,A,1,rs223400255,,,,0,,,,1,0,0,,,
S3T045032964,4,125824107,+,CATAACCAGGTGACATCTGATGAGGGCTTTGAGAGATGAGTAGGAGTTGG,,T,C,1,rs50745173,,,,0,,,,1,0,0,,,
SFT045034977,4,125874437,-,CTCTCCTCTGCAGCAGCTGGGTGGCATACAGGTACATATGTGTGGACTGA,,C,T,1,rs27551345,,,,0,,,,1,0,0,,,
gUNC8158630,4,125926394,+,AGCAAAGGAACTGGCTGCCAGAAAGTGTAAGAGTGCATGTGGAGGGGACC,,T,C,1,rs27532398,,,,0,,,,1,0,0,,,
S2J045038013,4,125950339,-,GCAAAGGGAAAGATTTGGTCATCTATTGGTGAAACACTCACCATTCTGAA,,C,A,1,rs32955342,DBA/2J,substrain,DBA/2J,0,A,,,1,0,0,,E2,Consensus
S3J045048197,4,126204925,-,GTCTAGCTTATCAGTGTGTTTGCAGTATTTTGCACTAGGCATGGCATGTA,,C,T,1,rs27528621,C3H/HeJ,substrain,C3H/HeJ,0,T,,,1,0,0,,,
SFJ045049605,4,126240132,+,CGGATCTCAGCCCACGTCTTCTTCACTGACCGCTGGATTGCTGCTTCATA,,G,T,1,rs27528580,FVB/NJ,substrain,FVB/NJ,0,T,,,1,0,0,,,
SBH045053653,4,126341348,-,GAGACCATGCCTCAAAACACAGCAAACACTTTGTTTACCTCAGCCCTGCA,,C,T,1,,BALB/c,strain group,"BALB/cAnNCrl, BALB/cAnNHsd",0,T,,,1,0,0,,,
gUNC8165193,4,126435340,-,AGTCCTCTGGTGTCATAGCAATAAGGAAAAATGAATTGACTTTCTGTGCA,,A,G,1,rs13471942,,,,0,,,,1,0,0,,,
B10040126544,4,126544146,-,AGGAGTTTAATTATCTTTTATAAGGAATACTAGCCAACCCATTACATTCC,,A,G,1,rs221471760,,,,0,,,,1,0,0,,,
UNC8171599,4,126954454,+,CTACATGTAAAAATATTCAATGATAGAAGTGCTGAAGAAATGGCTCAGTG,,G,T,1,rs46840577,,,,0,,,,1,0,0,,,
gUNCHS012792,4,127106431,-,TTATAAAATGAAAGGTTCCCTAGTGAAAATACTATAATTAAAAACAGATA,,A,C,1,rs32374970,,,,0,,,,1,0,0,,,
S2C045085610,4,127140253,-,TGCTTAAGCATAACATGTAAAATTGCATTCAGTCATCTTTGATGATTTTC,,A,G,1,,,,,0,,,,1,0,0,,,
gUNC8177483,4,127422213,-,CACAGGGCACCAGGTTCAATCCCCGGCAGTGCCAATAAAAAAATGTAAAA,,C,A,1,rs27563623,,,,0,,,,1,0,0,,,
S2R045097216,4,127430401,+,TGTGCTGTTTTGCATCCCCATTCTCTCTCAGCTCAGCGTTCAGAAGCCAG,,C,T,1,rs32407894,,,,0,,,,1,0,0,,,
SFT045112038,4,127800959,-,CTTCTGGCAATACTGCCATAAACACAGATGTGGTGGTCTGAATAGATTTG,,T,C,1,rs238330962,,,,0,,,,1,0,0,,,
S2H045116528,4,127913207,-,AATGCTTAATATTTGAGTTCATTTAACATTGTGGGTGTCAATCACATACA,,A,G,1,rs51515507,,,,0,,,,1,0,0,,,
SNJ045119035,4,127975875,+,GGGGCAGGGTCTCTCTCCCAACCAAGAGCTCTTCTTGTGGGCTAGCCTAG,,C,A,1,rs239799891,NOD/ShiLtJ,substrain,NOD/ShiLtJ,0,A,,,1,0,0,,CC,CC
SNJ045123405,4,128085137,+,GTCTCCCAGCCATTGAAAGCCTTTTTATCTTTTCCATTAAAAAGATTCAC,,G,A,1,rs28274505,NOD/ShiLtJ,substrain,NOD/ShiLtJ,0,A,,,1,0,0,,CC,CC
mUNC040280682,4,128089212,-,CTCTCCAGACTTCACTATTGATTTGCTTCCTTCCTGCTCTGCCTCAAAAC,,T,G,1,rs28274476,,,,0,,,,1,0,0,,,
DP3045125641,4,128141040,+,GGACACTGCTAGAAATGCAAACGTCTTTTGGGTCATCACTCAACTTTCTC,,C,T,3,,,,,0,,,,1,0,0,SPIKE,,
gUNC8193605,4,128440296,-,CCATGATTATAAAAATCCCAGTCACAGGGGTGGCAAGATGCTCAGTGGGT,,T,G,1,,,,,0,,,,1,0,0,,,
S1L045151423,4,128785589,+,GCCACGGCTCCCAAAATATTGAGGGAGGTAGAAAAATGCACAGGCAAGCA,,G,T,1,,,,,0,,,,1,0,0,,,
D6Y045181459,4,129536496,+,GCTGGGAACAGCCTAGCCATTAGTTCATACAGCACCTGAGTAGTTACATA,,A,C,1,,B6N-Tyr<c-Brd>/BrdCrCrl,substrain,"B6N-Tyr<c-Brd>/BrdCrCrl, C57BL/6NCrl",0,C,,,1,0,0,SPIKE,,
gUNC8210955,4,129560806,+,GTGCTGCATGCGGGTAGTTCCAGCACTGGAGTGGAGGCAGGAGGATCAGG,,A,G,2,,C3H/HeJ,substrain,C3H/HeJ,1,,,,1,0,0,,,
gJAX00124567,4,129623415,+,CTTTAGGGGCTAGACCTCCAACAATGTAACTCTGACTTGATTAGCTTAGC,,T,C,1,rs3696451,,,,0,,,,1,0,0,,,
SSR045186589,4,129664737,+,CATAAATTTATTTTTGTTGCTACTTCATAACTGTAATTTTGCTACTAAGC,,A,C,4,,,,,0,,,,1,0,0,,,
S6N045227117,4,130677948,-,CCAATTACTCTTGGGGCACTTTTGGATAACCAAATACACACAGACCTACC,,C,T,1,,C57BL/6NJ,substrain,C57BL/6NJ,0,T,,,1,0,0,,,
gUNCJPD001969,4,131071172,-,GTTGGAAGGTGTTATGAAATAGGATGGGCTGAGAGTGTACCTGGCAGGCC,,G,A,3,,,,,0,,,,1,0,0,,,
B10040131202,4,131202783,+,GCCTTTAGGGCCCATGGTTATTAGTGAATTGAGGGAGTCTGGAGAGACGA,,G,A,1,,,,,0,,,,1,0,0,,,
gJAX00566668,4,131512524,+,AGGCTTCGCAAAGGATACAATCATTACTCATGTGGTATATACCACCCTTG,,C,T,1,,,,,0,,,,1,0,0,,,
SS1045264097,4,131602449,+,TGCCTATGGTTTAGAAAGGAAGTATTGGGAGAAGTGACCCACAGTCTTAC,,G,A,1,,,,,0,,,,1,0,0,,,
SFJ045302782,4,132569550,+,GAGTAGGGCCTTCGCTGACTCTGGATCTTTTCAGCTGCATTGGGTGGTGT,,C,T,1,rs387693849,FVB/NJ,substrain,FVB/NJ,0,T,,,1,0,0,,,
gUNC8246502,4,132584772,+,CAACTAGGGTTGCATAGTGAAAATTTGTCTAAATGCTATTTATTTGTTTG,,C,T,1,rs32867372,,,,0,,,,1,0,0,,,
gUNC8249954,4,132936651,+,ATATTTCTCCTACACTTTGATCGAGTGGCCTGGTAGGTGCCAATTATGAG,,G,T,1,rs27542924,,,,0,,,,1,0,0,,,
S2J045322520,4,133063018,+,GGCTTGAGGGTGTCGTCAGAGCCCACCCCACTGCTGAAGATGAAGAACAA,,C,T,1,rs27557212,DBA/2J,substrain,DBA/2J,0,T,,,1,0,0,,E2,Consensus
SFR045332663,4,133316577,+,CCTGGAACTCCAATTCTGTGAGATCCAACACCCTCTTCTAGCATATACTA,,T,C,2,,FVB/NRj,substrain,FVB/NRj,0,C,,,1,0,0,,,
DSB045347432,4,133685803,-,CTAATGAGTGGAAGCCATCCATGGTTCTTGTGAGTTTTGTGTGACTCGGT,,T,C,1,,129S5/SvEvBrd,substrain,129S5/SvEvBrd,0,C,,,1,0,0,SPIKE,,
gUNCHS012931,4,133714746,+,TCAGGTTCACTTTATCAATAAGTTGAGAACCAATATCACATGCCAGGTAC,,C,A,1,rs235868554,,,,0,,,,1,0,0,,,
gJAX00567286,4,134011445,-,TAAGAATGGTTAGTAATAAAAGGAGAGTTCTCTGAGCCTCTCAGCACTTG,,T,C,1,rs27574127,,,,0,,,,1,0,0,,,
S3N045365554,4,134138861,+,GCCAGACTCAGAAAGCCTAGTCACCTTTCGGAGGGAGTCACATTCCTTCT,,G,T,1,rs27543987,,,,0,,,,1,0,0,,,
S6H045383934,4,134598372,-,AGTCAGGTGCAGGGGCCTGATGACAGGGTATTGTGTACACACCCACATTG,,A,G,1,rs48964871,,,,0,,,,1,0,0,,,
gUNC8275085,4,134862211,-,TGCTTTAAGAGATGACGTCACTACCAAAGTTGCACAGCTAATAAATAGCA,,T,C,1,rs27558681,,,,0,,,,1,0,0,,,
B10040135393,4,135393814,-,CAGATCCAGAACTGACTGCAGAAGCTCTCAGCAGGTCTTCTTGAAAGTAA,,G,A,1,rs27619603,,,,0,,,,1,0,0,,,
S3N045419128,4,135478219,-,TCAATAAGACTGGAGAGAAGGCCCCTTCTCTCAGAGTTTGCTGAGCTGCA,,G,A,1,,C3H/HeNHsd,substrain,C3H/HeNHsd,0,A,,,1,0,0,,,
mUNC8287091,4,135575318,-,TTGGGTATTGACATGATGCATAAAGAAGGCTTGGCACGATACCTGATCTA,,G,A,1,rs27580757,,,,0,,,,1,0,0,,,
gUNC8294388,4,136082855,+,TTCTGTTGGCTAAGCACTGCCAGCTCCTGCAGAAGGCCTGGTTTTGACTC,,C,T,1,rs264875922,,,,0,,,,1,0,0,,,
SSH045449945,4,136248625,+,CCGAGCCTCGTTTGCACACCCCAGGAGACCCGAGCGAAGGGCGGTGACTG,,A,G,1,rs27623263,,,,0,,,,1,0,0,,,
gUNC8302213,4,136664554,+,TTAGGTTACACACATGCTTCTTAAAAAAGAACCTTCTGGGGTTGGGGAGA,,T,C,1,rs32989424,,,,0,,,,1,0,0,,,
S6H045478139,4,136953499,+,CAAATGTCCACAGAGGAATGTCCCCTCTCCCGAGCCAGCCCTACGCCAGG,,A,G,1,rs46636473,,,,0,,,,1,0,0,,,
SAH045482141,4,137053548,-,TGTCTTCCTGTAATCCTTCCATTCCTTATAGTGAACACATTATAGATATA,,C,T,1,rs52144713,,,,0,,,,1,0,0,,,
gUNC8308485,4,137060211,+,AGGTGTGCATTTGTGTGCAAGTGCACAGAGGAAAGCTGGGAAACTAAAAA,,G,A,1,rs27573517,,,,0,,,,1,0,0,,,
S6H045488160,4,137204008,+,AAGGCCCGAGAAGTTAGCAATCAGCCTCAGCTACAGCACAGCCAGCCCCA,,G,A,1,rs47994592,,,,0,,,,1,0,0,,,
S6H045495048,4,137376224,-,GAAATAAAAATAGACTTTGTGGTGGCTTTATGAATAAACCCCATCAGGCC,,C,A,1,,,,,0,,,,1,0,0,,,
gUNC8318327,4,137803009,-,CTCCCTCCCTTCCTTTTTTCCTGTCTGTCTTAAATGTATTTATTATTATA,,A,C,1,rs32821587,,,,0,,,,1,0,0,,,
SSH045524647,4,138116182,-,TTCTTTATTAGTCTTAATCTGGCATAATCTCAATTCAACCACCATGAGCC,,C,T,1,rs27546840,,,,0,,,,1,0,0,,,
S6T045535770,4,138394253,-,TAAGGACCCATGTCCCAGACAAGCCAAGGCTTTCAGAACAAGCAGGTCCC,,C,A,1,,C57BL/6JBomTac,substrain,C57BL/6JBomTac,0,A,,,1,0,0,,,
gUNC8328711,4,138495693,-,TCTGAGCCAAAGCTCCATTTACATTGGTTTGGGGGCTCAGGGGAGCTCAA,,C,A,1,rs32848470,,,,0,,,,1,0,0,,,
S6T045541460,4,138536520,-,ATGAGATGTGCTTACTCATGTTGGAACAAGTCTGCTGGCCTCAGGCTTGG,,G,T,1,rs50931406,,,,0,,,,1,0,0,,,
S3J045550116,4,138752900,-,CTAAAGGAAGGGGTCTGGGAGAATAGATAGTGACAGATAGGGGTGGGTTT,,T,C,1,rs256416264,C3H/HeJ,substrain,C3H/HeJ,0,C,,,1,0,0,,,
ST2045553443,4,138836095,+,ATACCCCAACAGCTCAGAGAGGATTCTCTTTTCCTGGGAGAGAGCCATCA,,A,G,1,rs27560330,,,,0,,,,1,0,0,,,
SBH045556591,4,138914790,+,TGACTTGCTCAGTGTTATGTTTTATAAAACGGCAGTATAATGTGGCGGCA,,G,A,1,,BALB/cAnNHsd,substrain,BALB/cAnNHsd,0,A,,,1,0,0,,,
ST2045558646,4,138966170,-,GGCATAAGCATAAACTGCTGTTATTTGGGTCTTCTAAGAGCCAGCTCTCC,,G,A,1,,129T2/SvEmsJ,substrain,129T2/SvEmsJ,0,A,,,1,0,0,,,
mUNC040671242,4,139005216,+,CACAATGGGTAGGCTGGTGGATACATTATGTGGCCTGTGAGGACTCGGGG,,G,T,1,rs52310904,,,,0,,,,1,0,0,,,
gUNCHS013077,4,139363456,-,TCAGCAGTCAAGTGAGGAAGCTTCTCTATCTCGAGGAACTGGGTAAATTG,,C,T,1,rs27567940,,,,0,,,,1,0,0,,,
SAH045580624,4,139515608,-,GGTCCCCTGCATCTTATGATTGCCTCCCAAGGCCAGGTTCAAACCTTGGA,,G,A,1,rs27552545,,,,0,,,,1,0,0,,,
B10040139686,4,139686944,+,GACAGCTTGGCCACGTAGAGAAGAGAGTTTGTACTGAGTCCCTGTACAAG,,G,A,1,rs265682830,,,,0,,,,1,0,0,,,
SS1045602390,4,140059764,+,AATGAACAGTGGGGTGTGAATTATCACTCAATAGAACCATTGAACAAAAT,,A,G,1,rs235186875,129S1/SvImJ,substrain,129S1/SvImJ,0,G,,,1,0,0,,CC,CC
gUNC8352588,4,140197709,+,CTGAAATCTTGGTCCATGTGTCAGGGCTTCTATTTGCTCTGGTATAAGTG,,G,A,1,rs27612491,,,,0,,,,1,0,0,,,
SFT045612173,4,140304344,+,AGGTTCTAGAATCAACTATTAAAAAATCGTGTGTGCTCTGAGTGTCCTCA,,T,C,1,rs223192290,,,,0,,,,1,0,0,,,
S6T045628586,4,140714652,+,TCTGGGGGCAGAGGCCGGACTATAGCAAGTTTGAGGGTGGCCTAGCTTAC,,G,A,1,rs47912634,,,,0,,,,1,0,0,,,
gUNC8366533,4,140996029,+,CCAGCCTTCTGCAAACCACAGCCTGACTCTGGCGCTGTGTGGTTTTAGGC,,G,A,1,rs28260908,,,,0,,,,1,0,0,,,
DFH045653050,4,141326274,-,ATCTGGAGTTGTGTACCTACAGCTTGAATGCATTCTGTAGCTTTGACACT,,C,T,1,,FVB/NHsd,substrain,FVB/NHsd,0,T,,,1,0,0,SPIKE,,
gUNC8374038,4,141464722,+,CAGCGTGCAAGGCTCATGAGAAGACACACAGGTACCCACCTTGTCTCCTC,,T,C,1,rs27604115,,,,0,,,,1,0,0,,,
S3C045659529,4,141488239,+,GATTCTCAGTAACTGCTTAGAGGATCATGTACGCACACACACTGTAAACT,,A,G,1,rs108574666,,,,0,,,,1,0,0,,,
SSR045660680,4,141517001,+,GCCTCTGCGGGGACTGGTTTCTAGACTGGGACGAATGTGGTGAGCGACTC,,C,A,2,,129S2/SvPasOrlRj,substrain,129S2/SvPasOrlRj,0,A,,,1,0,0,,,
DBC045665564,4,141639104,+,CGGGCATGAGGTTAGAAACTTCTGGAGAAGTTAGTAAGGCTCATAAAACC,,C,T,1,,BALB/cAnNCrl,substrain,BALB/cAnNCrl,0,T,,,1,0,0,SPIKE,,
gUNC8380344,4,141964197,-,CATCCTTCTTGCCCCTTTGCAGATATTTTTCTGGCCACCTTCTCTCTAAG,,T,C,1,rs250214646,,,,0,,,,1,0,0,,,
SSH045683570,4,142089253,+,TGTTATTGTTTGGCTTTGGTTTGTTTATTTTGTTGTTGTTTAAAGAACTC,,C,T,1,rs32346503,,,,0,,,,1,0,0,,,
S1J045686426,4,142160651,-,GAGGGTGCTTGCAGACTGGATATGGGATCTTTGTTGGATCTTGGCGTTTC,,C,T,1,,DBA/1J,substrain,DBA/1J,0,T,,,1,0,0,,,
S3N045698174,4,142454371,+,AGTAGATCCCTAAGGCTCAAGAACTCTCAAAGGTGCCTTATTTTAGTCAA,,A,C,1,rs27584997,,,,0,,,,1,0,0,,,
B10040142470,4,142470676,-,GTTGCCAAGGGGATTTTCCACTCACTCTCTAGTCCCTGTCCCCTTCTATC,,A,G,1,rs234323302,,,,0,,,,1,0,0,,,
S2T045699915,4,142497883,+,GGTACTAATTATCCTTATTCTGAAAGCAAATGAGAAGATCTCTCCCCACC,,T,C,1,rs234915041,,,,0,,,,1,0,0,,,
S2R045700327,4,142508176,-,AGAAACTGTGTACCTGATTACAGTCCCCACCGCAGTTTCCTACCCTTGCC,,G,A,1,rs27626326,,,,0,,,,1,0,0,,,
UNCHS013166,4,142991504,+,GCAGCCCACATACATTGCAAACCCCCTTTCTCCCACTCAGGGCCCCCTCA,,C,T,1,rs46216124,,,,0,,,,1,0,0,,,
mUNC8397172,4,143296106,+,CTACAAGCAACCTCTTATCTTGACCTCCTCCAAATCACTGGACCCTCTTC,,T,C,1,,,,,0,,,,1,0,0,,,
S3N045733682,4,143342052,+,GGGTTCTCGAGTAGGAGTTTGCAGAAAGTGTAGGAATAGATAAAAATTCT,,C,T,1,,,,,0,,,,1,0,0,,,
mbackupUNC040335674,4,143607606,+,AATGAGTGCTGGACTACCTTACCCATCATTCACCTCAAATGTTTATGGGT,,T,C,4,rs264595211,,,,0,,,,1,0,0,,,
SBH045749283,4,143732075,+,ACCATGCTTGGCTTGGTTCCCATTCATTCATGATTTCCTTAACTGAATAC,,A,G,1,,BALB/cAnNHsd,substrain,BALB/cAnNHsd,0,G,,,1,0,0,,,
mUNC8403532,4,144407762,-,TCCTGCCGTTTGATACAGGATCACTCTTCTATGTAGTTCTGGTTGTCCTG,,C,T,1,rs32050879,,,,0,,,,1,0,0,,,
mUNC041634270,4,145194580,+,CCCCTACAAGAAGGAAAAGTTGGGAAGAGAGGGACCCTGGGGACAAACCT,,A,G,1,rs107667839,,,,0,,,,1,0,0,,,
mUNC8413922,4,145383491,-,TTCCTAGAAGGAAAGGTTTAATGCATCTGATATTCTGGCTCTGTGTTAGG,,G,A,1,rs27611777,,,,0,,,,1,0,0,,,
S2H045830845,4,145771142,+,CTGGCTGGTCATGGCACCTCCTTTCCCTCACTCTCTTCTCTATTTTTGTC,,C,T,4,,,,,0,,,,1,0,0,,,
gICR5505,4,147535674,-,TCTTAGTTATCTTAATTTCAACTCATTTCCCTCGAGGAATTCCCATGCAG,,T,G,3,rs581198680,,,,0,,,,1,0,0,,,
gUNCHS013242,4,147902496,-,GGGCTGATCCTTAGAATTTTAAAGCCTGTTAGAAGTCTCTTCTCAGTCCT,,A,G,3,,,,,0,,,,1,0,0,,,
S6T045926406,4,148160161,-,ATCGTGAACCAACTCTGGCAGAAAGGCGCAGTTCCAGTACCCAGCGTTGT,,C,T,1,,,,,0,,,,1,0,0,,,
mUNC040357800,4,148308888,-,GGCAAGGTTCCGGAGATTTAGAGTCCATGATGTTAAAGTGGAAGTCTGGT,,C,T,1,,,,,0,,,,1,0,0,,,
SAC045933601,4,148340034,+,GGAGAAAACACATTTTTCTCAAGAGTCCACACTCAGACAAGCACACACAT,,G,A,3,,,,,0,,,,1,0,0,,,
SS1045935243,4,148381090,+,TTCCTGGCGCTGTAAACCTGATCAGAAGCCCATGAACTGGGAGGTCACTG,,G,A,1,,129S1/SvImJ,substrain,129S1/SvImJ,0,A,,,1,0,0,,CC,CC
B10040148578,4,148578708,+,GCCTGTGTGCTCTGCCCCTGTAACACAGCACTTCTGCATGTGGAGAAAGA,,A,G,1,,C57BL/10,strain group,"C57BL/10ScSnJ, C57BL/10SnJ",0,G,,,1,0,0,,,
S6J045946472,4,148661822,-,CTCCAACCTCCTCTCCTCTCCTTCTTCCTCATGTCATCAGGCAAAACTGG,,T,C,1,,,,,0,,,,1,0,0,,,
S6H045954568,4,148864220,-,AAGATTTTGTGCTCACTACTTTTCAAGACTATAAATGGCTGTGGTTGTAC,,C,T,1,,,,,0,,,,1,0,0,,,
S3J045959972,4,148999301,-,CATTCAAAATTAGAATCTACTGGAAGGGAACAGAATCCCGTGATCTTTGC,,G,A,1,,C3H/HeJ,substrain,C3H/HeJ,0,A,,,1,0,0,,,
gJAX00570373,4,149325814,-,TAGGCAACATCCCTGGCCTTTAGAACAGCCTTTGAACCATGAGTGTCTTA,,G,A,1,,,,,0,,,,1,0,0,,,
gUNC8439633,4,149780071,-,CCATCTACGATGTCTGTGCCAGCTTGTTGGCTAGTTTGGTGCTGTGCAGG,,A,G,4,rs32549703,,,,0,,,,1,0,0,,,
DFC045996056,4,149901403,-,GGCACAGTAGGCATTGTGTCATTTTGCACAGTCCATGCATTCTTGTCTCT,,C,T,1,,FVB/NCrl,substrain,FVB/NCrl,0,T,,,1,0,0,SPIKE,,
S3C046003725,4,150093143,-,CTGGGCTACAGTGCTAGCTAGACCTTGGCTAGAACAAAAGCTAAGCCGGG,,G,A,1,,,,,0,,,,1,0,0,,,
gJAX00570618,4,150179485,+,CTGTTTTTCTTGCTGCCCATGTTTGTGGTTCAACGTCGTTTGTGAGTTTT,,T,G,1,,,,,0,,,,1,0,0,,,
D6H046018203,4,150455095,+,CAAAGGGACATTTTGTCTCACTCCATAGCTCTCCTTTACTCCTTGAGTTC,,C,T,2,,C57BL/6JOlaHsd,substrain,C57BL/6JOlaHsd,0,T,,,1,0,0,SPIKE,,
SBH046019910,4,150497767,-,GTTGATATTTTAAAGACAGTGTGCAATGCTTTGGTTTCTGTTTTGCTTTA,,A,G,1,,BALB/cAnNHsd,substrain,BALB/cAnNHsd,0,G,,,1,0,0,,,
gUNC8454694,4,150807219,-,ATATATATTCCAGCCATAATTTGTGTTTTTTTAGCATTACGTTCAAAAGC,,T,C,1,rs32715975,,,,0,,,,1,0,0,,,
S2R046033610,4,150840269,+,GTGCCCAGTTTTAAGTGGCGGTAGGGACTGAACGCAGGCATACCAGGCCA,,G,A,2,,DBA/2JRj,substrain,DBA/2JRj,0,A,,,1,0,0,,,
SFH046041856,4,151046400,-,CACTCTTGCAAACAATGTAATATAGACCGGGTAGGATTTTGTCTATGTTT,,T,C,1,rs32920184,,,,0,,,,1,0,0,,,
S2R046046705,4,151167643,+,TGGGGGCTTTAAATGTCAGCATGGGAGGGTCCCTGCGGGCTGGCTTGGAA,,C,T,2,,,,,0,,,,1,0,0,,,
gUNC8464849,4,151445095,-,CCTCTGTGTTCTGTCTGGGTGCATGTGTGCTTTTAACTGTTGTCTCCACC,,A,G,1,rs32781366,,,,0,,,,1,0,0,,,
SAJ046058708,4,151467715,+,TCAAGGCAAGCTTCCCACACTCTGGTGGGAGCTTTCGAGACAATGAATCT,,C,T,1,rs32786538,A/J,substrain,A/J,0,T,,,1,0,0,,CC,CC
S6Y046058864,4,151471614,+,CTCCTGTCTCCACCTCCTCGGACCTGAGGGTTTGTATACACACTGTCATG,,T,C,1,rs46729003,,,,0,,,,1,0,0,,,
S1J046065522,4,151638067,-,GGGGCTGCCAGCTGGAGCTGCTGTGAGCTGCTCTGAGCCTTCTCCTGCAT,,G,A,1,,DBA/1J,substrain,DBA/1J,0,A,,,1,0,0,,,
S2J046072076,4,151801924,-,TCATTTGGAACACTTTGCCCTTCTTTTGTTCTGTATTGCACATTGCCCAC,,C,T,1,rs32056886,DBA/2J,substrain,DBA/2J,0,T,,,1,0,0,,E2,Consensus
S6J046095085,4,152377125,+,GAACATGAACGAGTACCTGAGCTCCTTCAAGGTGGCACAGTATGTGGTCC,,G,T,1,,C57BL/6J,substrain,C57BL/6J,1,T,,,1,0,0,,CC,Not Fixed
gUNC8478387,4,152399451,+,AAAACCCAGGGCATCTCTGCAGCATTACAGACAATACATAGGAATGCAGC,,A,G,1,rs32859797,,,,0,,,,1,0,0,,,
gJAX00571383,4,152952414,-,ACTTTGTGAACACCCAGACACTGAGGATGACCTGTTGGAAACAGAGCTTA,,A,G,1,rs32634002,,,,0,,,,1,0,0,,,
gUNC8490992,4,153055912,-,TGGTAACTGTGGAGCTGTCCCTTAGCTGAGGTCTTTTGAAAGCTGGACTC,,A,G,1,rs32457983,,,,0,,,,1,0,0,,,
S2J046128526,4,153213170,-,ATCAAAAAGGTTTTAATTATTCCATTCCTTGATAAGGTTCGAATCCACCC,,G,T,1,rs255481936,DBA/2,strain group,"DBA/2J, DBA/2JRj",0,T,,,1,0,0,,,
gUNCHS013373,4,154074539,+,ATAGAAGTCTTAGAAGTGAGTTCCAGTTTGGTTTTGTCTTCTCAAGACCC,,G,A,1,rs108550761,,,,0,,,,1,0,0,,,
gJAX00571774,4,154449420,+,CATTTCATCTTGGTTTGAGAAGTTGTCCCAGCTTGGGCAATAGAGGGCGC,,C,T,4,rs33064656,,,,0,,,,1,0,0,,,
gUNC8519564,4,154876625,+,CTCCACTTTCATTCATGGTCATCGGGAATTCTGTTCACAAGCAACCATAT,,T,C,1,rs33109765,,,,0,,,,1,0,0,,,
BCC046203725,4,155093131,-,ACTGCCAGATGAAGTGTGGGCAAACACCATCAAGGCTCCCAGTCCTCTAA,,A,G,1,,C57BL/6J,substrain,C57BL/6J,0,,,,1,0,0,SPIKE,Consensus,Consensus
B6_04-154488272-S,4,155114163,-,ATGAAATTGCTCCTATGACTGAGGTGGAGACAGACGAAGGGGGAGATGGA,,G,A,1,rs261460574,C57BL/6NJ,substrain,C57BL/6NJ,0,A,,,1,0,0,,,
S3R046212261,4,155306527,-,GATGGGAAAGTCCCTAAGGGCAGGAGGTGAGCGCACACTCAGATGGCGTC,,C,A,2,,C3H/HeNRj,substrain,C3H/HeNRj,0,A,,,1,0,0,,,
SS1046216909,4,155422748,-,GGTGTAGAACATGAAGGAACTGGCTATGGCCAGGTCTGGGTGGCGCTTAC,,G,A,1,rs264683542,129S,strain group,"129S1/SvImJ, 129S4/SvJaeJ",0,A,,,1,0,0,,,
gUNC8531398,4,155735577,+,CACTACACGCGTGATCACACTTGTGCAGCGGGCCCCACTTGGCCGGTGAG,,C,T,1,rs47953462,,,,0,,,,1,0,0,,,
S6T046236222,4,155905557,+,TGGGCCGTACCGGGTGAGTTCTTTGGGTCTCTCTTGTGTTACTGTCCCTC,,A,G,1,rs32767885,,,,0,,,,1,0,0,,,
gUNC8536472,4,156059951,+,TCCTGGCCCCCAAACAGGTGTGTCCCTCGGGGCTCTGATAGGCTAAGAGG,,A,G,1,rs50356239,,,,0,,,,1,0,0,,,
UNC8536741,4,156073392,-,AAACCTCTCATGGCATACCTTAGAATTGTCTCTACTGACTGCTGAGCTCT,,C,T,1,rs31776481,,,,0,,,,1,0,0,,,
gUNC8538182,4,156164170,+,TATTTCCTCACTGTGCTCTTTTAGAATGGTAATCTAAAATATCCTATGCC,,A,G,1,rs45693376,,,,0,,,,1,0,0,,,
SNJ050120685,5,3017135,-,CATATTTTGCATTTGTGCTTCAGGTTTGCTGTGTGTGTGTGGTCCTTGAG,,A,C,4,,,,,0,,,,1,0,0,,,
mUNC050000078,5,3160082,-,AGCTCTCATCTCATCCCTTCCTTTGAGGAAATAAAACTGAAGGAACCCCG,,A,C,1,rs33733319,,,,0,,,,1,0,0,,,
gUNC8545548,5,3929140,+,GGCTCTTTTGTAATGTGTGGAATGGAACTTCGGGGCATCGAAAGGTTCCA,,T,C,1,rs51069917,,,,0,,,,1,0,0,,,
mUNC050443053,5,4312526,+,TCGGGATGTTTTCTTCCGTGTTTCAGTTCATAGAGTTGGTACGCTGAGGA,,C,T,1,rs213651578,,,,0,,,,1,0,0,,,
mbackupUNC050316601,5,4967351,+,TATCTGCCATGGACCTCTCTGTTTTCCTAAGAGTGAGACAGCCAGACAAA,,A,C,1,rs31080874,,,,0,,,,1,0,0,,,
B10050005373,5,5373426,+,TTCTAAGCACAGTTAGCACCTATGGACTGTACCTAAGAGTAAATAAATCC,,G,A,1,,C57BL/10,strain group,"C57BL/10ScCr, C57BL/10ScNHsd",0,A,,,1,0,0,,,
gJAX00572911,5,6184027,+,TACAAATAAACATTTAATTTTGACTATATAGATTTTGAATGACACTTGAA,,T,G,1,rs30931636,,,,0,,,,1,0,0,,,
gUNCHS013469,5,7160707,+,CACTTGTGAAAACACTTAACATATACATTTTTGCTAAATATGTGTTGTAA,,C,A,1,rs229514369,,,,0,,,,1,0,0,,,
gUNC8594535,5,7518518,-,TGACAGCATCTAGGAGAGCACACTGGAGCTTCAGCATTTTGCCAGATAGT,,T,G,1,rs31314334,,,,0,,,,1,0,0,,,
gUNC8603212,5,8135627,+,ACCTGGAACTCTTCTGGAGTCCTCAGACACAAGGCATGCATGTAGTTCAT,,A,G,1,rs248419093,,,,0,,,,1,0,0,,,
S3T050328794,5,8219853,-,TGAATGGCCAACTCATGCCTCTAGGACAGTTTATGAATAAGAAGCACCTT,,A,G,1,,C3H/He,strain group,"C3H/HeNRj, C3H/HeNTac",0,G,,,1,0,0,,,
mUNC050013072,5,8798637,-,AACCTAGGCAGAGCTCACTGCCCCACGGAGCCAAGAGAGGAGGAGGAGCC,,G,A,3,rs8260617,,,,0,,,,1,0,0,,,
SBR050365035,5,9125877,+,ACCTTTCATAGGCAAACAGCATCATGTAGGACCACCACCACCACCAAAAA,,A,C,1,,BALB/c,strain group,"BALB/cByJ, BALB/cByJRj",0,C,,,1,0,0,,,
SAJ050375407,5,9385197,-,AAGTTCCCAGTGCTGAAGCTAGCAAAGAAATGCAGAGCCATGAGGGCATC,,A,C,1,rs33651040,A/J,substrain,A/J,0,C,,,1,0,0,,CC,CC
B10050009506,5,9506347,-,TCTTTCAACTGTTTTGCTATAATCCAGCATTCAGTTCCCTCTCCAGACCC,,G,T,1,,,,,0,,,,1,0,0,,,
gUNC8619742,5,9508155,+,TTTTACTGGGGAAGGAGGCTTGGCCAAAGGCAAGGCATTTGTTTCAGATG,,T,C,1,rs33659996,,,,0,,,,1,0,0,,,
gUNC8627615,5,10131446,+,CATTTGTGCATGGGAACTGACCCTGAACCACAGCCCACCACATCCCAATA,,C,A,1,rs33256907,,,,0,,,,1,0,0,,,
gJAX00573805,5,10316558,+,GGTAGGTCCATTTGTCCATAGAAATCTTTTTTTTTTCTATTTGACAGAGC,,A,G,1,rs31486280,,,,0,,,,1,0,0,,,
DIV050011328,5,11328165,-,GGTCGTGTGTGTGTGTGTGTGTGTGTGTGTGTGGCGGCAGGGGGGGGGGG,,A,C,3,,,,,0,,,,1,0,0,,,
gUNC8637633,5,11988166,-,TGAAACTCCTCTTCTATGTTAAAAGAAAGAGTTATTGTAGTTAAAACCCA,,A,G,1,rs29197572,,,,0,,,,1,0,0,,,
gCEAJAX00127090,5,12260003,+,ACAGGAAGATAAGCTAAAGACTTTTACTGGAAACATAACACAAGTAGAGA,,T,C,1,rs31564288,,,,0,,,,1,0,0,,,
SFR050494209,5,12355234,-,CTTGCCAGCCCAGAATACAAGGTGTTCCAAGTCTGAGACACTTTGTTTAA,,C,T,2,,,,,0,,,,1,0,0,,,
gUNC8648308,5,12652862,+,TAATATGTGTTTTCCCATTTTACCTGTATAAGCCTCCATTCCCTGTGTGC,,C,T,1,rs51944304,,,,0,,,,1,0,0,,,
S2H050509570,5,12739270,-,TAGTTATAGTTGACTCTGTTTAGAGATTGTTAGTCTGGTGATTCTGTTAC,,G,A,4,rs260994591,,,,0,,,,1,0,0,,,
mUNC050320016,5,13731456,+,AGCAACTTTTCAGAGCGTAGGGTACTAGGTGATAATTAATCCCCATTCCC,,C,A,1,rs49450107,,,,0,,,,1,0,0,,,
gUNC8670226,5,14048902,-,AAGATAAATAAATAATGCTAGAAAGTAAAGAAGGGGGGAGGGGTAGCAGC,,T,C,1,rs243029526,,,,0,,,,1,0,0,,,
B10050014237,5,14237100,+,TGAATAGTTTAACTCCTAGGCAATCGCATGACCTGTGTAATTAATGAAAC,,G,A,1,,C57BL/10,strain group,"C57BL/10ScCr, C57BL/10ScNHsd",0,A,,,1,0,0,,,
SSR050578389,5,14459726,+,ATTTTTCAGTATAACTTACTTCAACAATTTCAGTCAAATCTTTTTCTCTC,,C,A,1,rs31687948,,,,0,,,,1,0,0,,,
DS1044922269,5,14541253,-,GAAAACTAAGCTGCCTCCAAACACAGCCAGCTCTACACAGCACTTAACAG,,G,A,1,,129S1/SvImJ,substrain,129S1/SvImJ,0,A,,,1,0,0,SPIKE,,
gUNC8678790,5,14545667,-,TAACATCCTAGTAATTACCAACTGATGTATGAGCAAGAGTACATAGAACA,,T,G,1,rs29192356,,,,0,,,,1,0,0,,,
S3N050587105,5,14677636,-,GTGATGGTTCGATCTAAGGATACACCTATATCTTCTGGATAGTCGATAAC,,C,T,1,rs214431506,,,,0,,,,1,0,0,,,
gUNC8686439,5,15879269,+,GAGAGAAGCAGGAGCACAGAAAGTTAGCAGGTTCATTTGTTAGTATTTCC,,T,C,1,rs49401104,,,,0,,,,1,0,0,,,
DAH050640986,5,16024658,-,TTATTTTATTATGCACAGGTTCTAAGGCCTGGTCCCAGCTGAGCAAGGAT,,C,T,1,,A/JOlaHsd,substrain,A/JOlaHsd,0,T,,,1,0,0,SPIKE,,
backupUNC050029531,5,16608488,+,TGTTCATTTGTGAGTAGTGGAGCAGATAGAGGAAGGGAAGCGAAGGAAGA,,A,G,1,rs33583186,,,,0,,,,1,0,0,,,
mbackupUNC050030024,5,16787215,+,TGAAAGAGAACTTACTACCAGCCCTTTAATAAACCATCACAATCCCAGCC,,C,T,1,rs49677528,,,,0,,,,1,0,0,,,
gUNCHS013549,5,16843916,-,GGTTGCCCAAGAACTAAGAACCAGTAACTGTTGTGTACTCTACAGGACTC,,A,G,1,rs33699835,,,,0,,,,1,0,0,,,
S6J050685107,5,17127695,+,AAGTAAACAGCCCATGTGCAAGGATCTGCAGTAACAAGGAACAGATGAGA,,T,C,1,rs33063065,C57BL/6J,substrain,C57BL/6J,0,T,,,1,0,0,,E2,Consensus
DBC050705688,5,17642204,-,TAGGCAGACAGGGTTCCTGTCAGGTATTTGCCTCTGGCTTATTTTCATCA,,G,A,1,,BALB/cAnNCrl,substrain,BALB/cAnNCrl,0,A,,,1,0,0,SPIKE,,
S2C050709589,5,17739731,+,CAGAATACTCTGCAGTAAAAAGCATGATGGCAGGTGGGAAAACCAAGGTG,,G,A,1,,DBA/2NCrl,substrain,DBA/2NCrl,0,A,,,1,0,0,,,
gJAX00225545,5,17995435,+,GCCCAAAATGTTCTGCAATTGAATTCCTGTAAGCAATATATGTGGATCAC,,C,T,3,rs50243688,,,,0,,,,1,0,0,,,
gUNCHS013570,5,18515057,+,GAAGGTCCGAAGTTCAAAATCCCAGCAACCACATGGTGGCTCACAACCAT,,T,C,3,rs51318974,,,,0,,,,1,0,0,,,
gUNC8734617,5,19048885,-,GACCGACTCACAGATTCTCACACAAACTAATAATTAAAAACACTTATCAA,,G,T,1,rs31834885,,,,0,,,,1,0,0,,,
B10050019134,5,19134651,-,CTCATGATGTCTCCTCTCTTCTCAATCTGTCTTACCTTTCTTTCGCTCCA,,A,C,1,,,,,0,,,,1,0,0,,,
gUNC8743198,5,19629145,-,CCTTCTCTAGTACACATACTGCTGCCATGATGCTCATGTCTAGAACTTTG,,C,T,1,rs33130459,,,,0,,,,1,0,0,,,
S2J050796177,5,19904436,-,ATAGAGAGAGATGGGCCTTCTATATTTTATTACACAGCATGTGGGATTTA,,C,A,1,rs33735962,DBA/2J,substrain,DBA/2J,0,A,,,1,0,0,,Consensus,Consensus
gUNC8753398,5,20396045,+,TGCTTATAAAAATAGGAGTACCCAACTAATTTTTACATCTTTTGGTAAAC,,G,A,1,rs47941797,,,,0,,,,1,0,0,,,
DFH050828840,5,20721011,-,TTCTGCCTGAAGCTTGAATCACTCAGTCAAAGGTCTGAGTATCAGGTTTT,,C,A,1,,FVB/NHsd,substrain,FVB/NHsd,0,A,,,1,0,0,SPIKE,,
mbackupUNC050044412,5,20796343,+,AAGGGAAGGGGGAAACAGAAAGTCAAGGAAGAACACAAAGCTGCCTTGTT,,G,A,1,rs29528210,,,,0,,,,1,0,0,,,
gUNC8767041,5,21388919,-,AGCAGAAGATGGACCCAGACGAGGTCTTTAGAGAGCATAGTATTAGAAGC,,A,G,1,rs33714971,,,,0,,,,1,0,0,,,
gUNC8772987,5,21709333,+,CACTGGGCTGCACTTTTACCAATAGCCTCTCATAGGTTCTTTTCATGGTG,,C,T,3,rs221701098,,,,0,,,,1,0,0,,,
ST2050898867,5,22471697,+,ACAGGCAACTCAGACTTGGGTTGCTCAGCTTAAAGAAAGGATGCTGATCA,,C,T,1,rs49138075,,,,0,,,,1,0,0,,,
gUNC8787778,5,22770696,-,AAGGGGAGAGAGTGGAGAAACCTTGACTGTCTGGAGAAAGAGGCTGACTG,,A,G,1,rs33667208,,,,0,,,,1,0,0,,,
DZO050919412,5,22985309,+,GGAGGCTTTGAAACTCACAAAGTTCTGCACATTTTTATCTTGATGGTCTC,,C,T,1,,NZO,strain group,NZO/HlLtJ,0,T,,,1,0,0,SPIKE,,
gUNCHS013644,5,23146225,-,GTAAATCTTTGGAATGACTAAATGTATGGCTGGTGAATCCCTGCCTACCC,,G,A,1,rs251046794,,,,0,,,,1,0,0,,,
S1H050926695,5,23167381,+,GTTTGGCTGCAGGTGACAGAAACCTCCGTTAAAGAGTCTGAAACATGGAA,,A,C,1,rs46880688,,,,0,,,,1,0,0,,,
B10050023394,5,23394078,+,TTTTTCCCGTGGTTCTGTAGCTAGAACTTGGATCCTTGTGCTTGCTTACA,,C,T,1,,C57BL/10,strain group,"C57BL/10ScSnJ, C57BL/10SnJ",0,T,,,1,0,0,,,
gUNC8802660,5,23818733,-,AAATAATAATAAAAGTAAAAGGGGGCTGAGACTTCATGTACGAGGTAGGG,,A,G,1,rs32060922,,,,0,,,,1,0,0,,,
S6T050961912,5,24047809,-,CTTGGTTGTATTGTCAGCATTTGGTTCTCTCTGAAAACTCTAGAGTACCA,,C,T,1,rs51051049,,,,0,,,,1,0,0,,,
S2H050962683,5,24067099,-,GGTTCCTAGCAGACACATCCAGTTTCTCAGCATGTGGGACTTCTGTGGCT,,C,T,1,rs51019912,,,,0,,,,1,0,0,,,
S3N050967758,5,24193958,-,TACTATCTAATCAGGATCCAAAGACTAAAAGGCTATATAAGAATTATCTT,,G,A,1,rs49012492,,,,0,,,,1,0,0,,,
gUNC8812264,5,24422899,+,TTCCCGGTTTTTAGCCTTGAACACAGTTCCATAGGTGCCTAGAGGAAGGT,,T,C,1,rs231012552,,,,0,,,,1,0,0,,,
gUNC8816497,5,24804132,-,GCAGCATCTGTAGAAGCAGCCCAGAGAAACAGAACATAGTCACACTGGAA,,T,C,1,rs31992933,,,,0,,,,1,0,0,,,
gUNC8825065,5,25369451,-,ATAATGCAGAAGGCAAGCATGTATCTGTCAGTGGCAGCTCACCTCTTCTC,,T,C,1,rs33185810,,,,0,,,,1,0,0,,,
S2J051017834,5,25445855,+,TCACCTGAAACTTTCCACTACCTGGCTTCTCTTGCAGAGTACCTATATCT,,A,C,1,rs33497497,DBA/2J,substrain,DBA/2J,0,C,,,1,0,0,,E3,Consensus
D2H051046837,5,26170936,+,TGTTACTCCCTGCAGGAAGCAATATATCTATGTGTCCTTAACTGTTTCTG,,C,T,2,,DBA/2JOlaHsd,substrain,DBA/2JOlaHsd,0,T,,,1,0,0,SPIKE,,
gUNC8834177,5,26200513,-,AGTTAGAGCTGAGGTAATGCCTTAGAATAGGGCTCAGTTCAGGGCAGGTG,,T,G,1,rs3684578,,,,0,,,,1,0,0,,,
SAC051070006,5,26750174,+,TTTTCAGGATGATGTGAGGTTCATTTACTCCTTGAGTCTCATGAGTTTCC,,C,T,1,rs232783648,,,,0,,,,1,0,0,,,
mUNC8843322,5,26810274,-,CCCTGTCGCTTATGCATTCTGTAGCAGAATTTCCCCTGTCCAAACACTTT,,T,G,1,rs237095752,,,,0,,,,1,0,0,,,
gUNC8852133,5,27383065,-,TCAAGATGAATAAGCATCAGTAAATTTTGATCCATGCTATTTCAATCTAG,,G,A,1,rs32163141,,,,0,,,,1,0,0,,,
B10050027442,5,27442820,-,AGAAATATACACTTCCTTTTTTTACATTCTTAAACGTGAACGTCCAACTC,,C,T,1,,,,,0,,,,1,0,0,,,
SNT051115260,5,27881520,+,CTATAATGACAAAATTTAACAAGATCAGATTAAACATTAAGACCTCCTGG,,C,A,1,rs253962078,,,,0,,,,1,0,0,,,
mUNC050076300,5,28171695,-,CCATACACTAAACAGAAGACATTGTGGAGTTACATATAATGTGTTTTTTG,,A,G,1,rs218999084,,,,0,,,,1,0,0,,,
mUNC050077230,5,28583855,-,GAGCCACACCAAGGTATTTTATATTGTGTCTATTGTGAAGAGTGTTGTTT,,A,G,4,rs251294941,,,,0,,,,1,0,0,,,
SFJ051169891,5,29247298,+,CTGCAGAGAGACCTAATTCTAATTTGGTTTGAAATTCATTTTCAGATGGC,,T,C,1,rs386928941,FVB/NJ,substrain,FVB/NJ,0,C,,,1,0,0,,,
gUNCHS013803,5,29300990,+,CATGCATCAAAATTACCAAGGGCTGCAAGGTCTGGAGCATCATCCCCAAA,,A,G,1,rs29580666,,,,0,,,,1,0,0,,,
S1J051178805,5,29470130,-,TAGTTCTGAATATGAATCTAAAACACTGGCAGCACCCTCCGAAGGAGAAA,,G,A,1,,,,,0,,,,1,0,0,,,
SAH051187143,5,29678575,+,ACTTAACCTAAAGGGAAAAGAAAAGCTTTATTCTGGAGCCTTTCTGAGCA,,A,G,1,rs49894014,A,strain group,"A/J, A/JCr",0,G,,,1,0,0,,,
DS6051196802,5,29920062,-,AGAAGGGAAGATGATCTAATGGCCTGACAGAAGACCTTCAGAATCAGTTT,,A,G,1,,129S6/SvEvTac,substrain,129S6/SvEvTac,0,G,,,1,0,0,SPIKE,,
gUNC8884202,5,29962468,-,AGGGACTGTGATTCAAAATGGAAGACTGAGAGAACATAGAAAGCTCAACT,,T,C,1,rs29619116,,,,0,,,,1,0,0,,,
SFJ051225038,5,30625974,-,ATAGAACGGATATGCACACCCTGAATGTGGTAGGGTGGTTGTGAGTCATG,,C,A,1,rs387602947,FVB/NJ,substrain,FVB/NJ,0,A,,,1,0,0,,,
SAJ051226762,5,30669074,+,GTGGGCCTGACTGGAGAGAGCTTTAGTGTGTAAGTCCTGCTTGAAATTCT,,C,T,3,rs32487421,,,,0,,,,1,0,0,,,
gJAX00577825,5,31006191,+,AAAGGTCATGCAAGAAACAACTGAAGAAACTTAGTCTCCACGAGCTGAGC,,C,T,1,rs32451564,,,,0,,,,1,0,0,,,
S2J051250628,5,31265723,+,TCCAGCTGCTTTTGCTGTACCAAGTGGTCCCCCCAGGCCTCCTCTAGCCT,,C,T,1,rs250300786,DBA/2J,substrain,DBA/2J,0,T,,,1,0,0,,E3,Consensus
S3J051250854,5,31271351,+,ACTGGTTCCCAGGACCTCATCAAGGCAGCTCACAACCTCCCGAGCCTCCA,,G,A,1,rs221513006,C3H/HeJ,substrain,C3H/HeJ,0,A,,,1,0,0,,,
gUNC8903549,5,31662170,+,TCTGTGTGAAGGTTGTCAGATCCCTTGGAACAAGAGTTACAGATAGTTGT,,G,A,4,rs33420291,,,,0,,,,1,0,0,,,
SBH051285761,5,32144025,+,AGAACTCCACCCCTGAACAATTATTTTAGACTCTAATGGTGATGCTCCGA,,C,T,1,,BALB/cAnNHsd,substrain,BALB/cAnNHsd,0,T,,,1,0,0,,,
DBT051291767,5,32294185,+,GGCACTGGAGGATAGTTAGATATGCTCATTTTTCAGTTCACTTGCTGGCA,,A,G,2,,BALB/cJBomTac,substrain,BALB/cJBomTac,0,G,,,1,0,0,SPIKE,,
gJAX00128535,5,32319918,+,GGCCTGCCATGACTATGTCTTAGATTCATGTGGAAATCTAAAACCGGGCT,,T,C,1,rs33148469,,,,0,,,,1,0,0,,,
gUNC8914581,5,32659925,-,CTACATTATCAGATGTTATGGATATGTGGATTCTTACTGATAGGTAAGAG,,G,A,1,rs33075728,,,,0,,,,1,0,0,,,
UNC8914882,5,32724179,-,TTTCCCATGCCTGAGTAAAGACTGTGCCTCAGAGCATCTGTCTCATGACC,,C,T,3,rs49903289,,,,0,,,,1,0,0,,,
gUNC8920690,5,33192583,-,GAGGCACACACATACCCTGCACCTGTGCATAGAAATCTTTAGTATTGATA,,A,G,1,rs51670995,,,,0,,,,1,0,0,,,
gUNC8930200,5,34187547,-,GCCGTCCCGTGCGCGGGCGGCAGGATGGAGCTGAACTCTCTGCTGCTGCT,,C,A,1,rs13471729,,,,0,,,,1,0,0,,,
S3C051374510,5,34362754,-,GTTTTTGTTTTTCTGTTATTGTTTCTTTTGTTGGTCTTTTTGTTTGTTTG,,C,A,1,rs264140530,,,,0,,,,1,0,0,,,
D6Y051376353,5,34408839,-,ATTCACCACCAAATACATGGGTCCAAAAGAACCTTAAGATTTCAGCTTTA,,A,G,1,,B6N-Tyr<c-Brd>/BrdCrCrl,substrain,B6N-Tyr<c-Brd>/BrdCrCrl,0,G,,,1,0,0,SPIKE,,
gUNCHS013953,5,34611935,+,TTAAATGAATGTTAAAAATTGGCATATTCGGGCTGGAGAGATGGCTCAGT,,A,G,3,rs256634559,,,,0,,,,1,0,0,,,
UNCHS013958,5,34644552,-,ACAAGGGTCACATGAATCCAGCAGTTCAAGCTTGAACAGTATAGAAAGCC,,A,C,1,rs33090067,,,,0,,,,1,0,0,,,
gbackupUNC050328531,5,34828203,+,TTCCCAAGTGACTTTTGTGAAGTCGTGATTTACAGGAAGAGTGTTAGTTG,,A,G,1,rs33141113,,,,0,,,,1,0,0,,,
gJAX00578511,5,34951554,+,GTCCTGCATACCAAAGACCACAATAGTTTGTGGCTTTACTGCCCTGTAGA,,T,C,1,rs6345151,,,,0,,,,1,0,0,,,
DP3051410955,5,35273887,-,TACACTTTGGAAGCTCTTAAAGCATGGTCACCATCACTACCACAACTGCT,TACACTTTGGAAGCTCTTAAAGCATGGTCACCATCACTACCACAACTGCA,A,T,3,,,,,0,,,,1,0,0,SPIKE,,
S3T051419943,5,35498589,+,AGGGTGGTCTTCAGGGGAGCCTCTTAGGAGCTCTGCCCATGTCCCAGTAT,,G,A,1,,C3H/HeNTac,substrain,C3H/HeNTac,0,A,,,1,0,0,,,
gUNCHS014010,5,35876873,+,CTGAGTGTCAAATGTGACATTGGCCTTCTCTGCAGGTGACAGCAGCATCA,,G,A,1,rs32605771,,,,0,,,,1,0,0,,,
DSB051456720,5,36418004,+,CAGCACATCTTCAAATATGGAAGAAGGCTTATTTCATACGCTTCAGAGGT,,G,A,2,,129S5/SvEvBrd,substrain,129S5/SvEvBrd,0,A,,,1,0,0,SPIKE,,
gUNC8961002,5,36470764,-,CAAGGTGGCAGGTCATGGGCAGCTGAGCAGTAGAACAGCAACAGGTGAAG,,C,T,1,rs32559698,,,,0,,,,1,0,0,,,
SFC051467403,5,36685078,-,AGCTGTGTTTACTAAAACACCTTTGAAGTAATAACAGCCAATGCATTTCT,,T,C,1,,FVB/NCrl,substrain,FVB/NCrl,0,C,,,1,0,0,,,
B10050036750,5,36750040,+,ATTTGTAGTGGGTATTTTGTCCAAATGGCCTGGACCCCATTGTCAGGAGA,,C,T,1,,C57BL/10,strain group,"C57BL/10ScSnJ, C57BL/10SnJ",0,T,,,1,0,0,,,
SAC051487485,5,37187145,+,ACAAGTGCCAGGAGAGGAACCGCCTGATTGAACACCTACTGCAGGAGCTG,,C,T,1,,A/JCr,substrain,A/JCr,0,T,,,1,0,0,,,
gUNC8972557,5,37279309,+,CAAACCATACCTCTCTTAAGGCCATGACTGAAGCCTTCACAGAGTGTAAA,,C,T,1,rs33370797,,,,0,,,,1,0,0,,,
DP2051513383,5,37834581,-,TCTGTTTAAACAAGTGTGTCTGAGCAGGAAAATCAAACAGACAGGGACCC,,A,G,2,,129P2/OlaHsd,substrain,129P2/OlaHsd,0,G,,,1,0,0,SPIKE,,
gUNC8990259,5,38380966,+,TCTAGAACTGTTTGGAATGTTAGCATATCTGACAGATGACCAAGATGCCC,,G,A,1,rs108365263,,,,0,,,,1,0,0,,,
D1H051547052,5,38676321,+,CCTGGCATCATTTGAGCAATTTCCCCCATGTTTTCATCCAGCAATGAGGA,,C,T,1,,DBA/1OlaHsd,substrain,DBA/1OlaHsd,0,T,,,1,0,0,SPIKE,,
gUNC8995726,5,38730232,+,TGGAAGTCCTGAATTCAAATTCCCAGCAACCACATGTACTCATATACATT,,G,A,1,rs52582802,,,,0,,,,1,0,0,,,
S1L051578076,5,39451924,-,TAATCATAGAGGATATGTGGCAACACATTTGCAGATGTTATCATTAAACA,,C,A,1,,DBA/1LacJ,substrain,DBA/1LacJ,0,A,,,1,0,0,,,
gUNC9005338,5,39473188,+,GCATCTCTGACTGACACTGCTCCTATTGTATGTTCTTCACTTGGGACTTA,,C,T,1,rs32724350,,,,0,,,,1,0,0,,,
mJAX00129109,5,40015319,-,GACCCTAGAAGATGGACATGTGGACATTTCCAGATGGAAATTGCTGGATA,,T,C,1,rs29521451,,,,0,,,,1,0,0,,,
S3T051616754,5,40418851,-,TTAAAATCTTTTCTATTTCCTCCTTCTTTGTGCATGTTGGCTTAAGTCAT,,G,A,1,,C3H/HeNTac,substrain,C3H/HeNTac,0,A,,,1,0,0,,,
gUNC9020575,5,40569105,-,TTCTGGTTCATCATCTAGCTGCTAACTATGCTTGATTGTAGGCTGAACAG,,G,A,1,rs29775268,,,,0,,,,1,0,0,,,
gUNC9027831,5,41069131,-,AGGTGAAATAAACACTTTCTTCCCCACATAGCCTTTGGTTAAGGTTTTTT,,C,A,1,rs33191015,,,,0,,,,1,0,0,,,
S2J051650659,5,41266477,+,ATATCAGTAGTATGTTCATTATGACTTTAACATTCTAACTGCTCCTGGAA,,C,T,3,rs245074465,,,,0,,,,1,0,0,,,
SBH051670228,5,41755704,+,ACTTCACGCTAGATCCTCACTAAAGAGGAGAGAGCACCCAGCCCGAACAG,,C,T,1,,BALB/cAnNHsd,substrain,BALB/cAnNHsd,0,T,,,1,0,0,,,
mUNC9036507,5,41810898,+,CCTTTCCCCCAACTTTCCAGATAGCAGTCGTGTTGTGGATTATATGTAGT,,G,A,1,rs38035640,,,,0,,,,1,0,0,,,
SFC051673791,5,41844775,-,GAGCAAGTGAGATAGACACACCAGAAGAATGGGATGGGTGGGTGGAAAAA,,C,A,3,rs213179536,,,,0,,,,1,0,0,,,
S2R051677257,5,41931445,+,TACAATCTCTGTACACCAACTTGATTTCCAGTGATTTGGTTTAATTCTAT,,C,T,1,rs46221851,,,,0,,,,1,0,0,,,
gUNCHS014164,5,42178357,+,GTAGCCTTAAAGGGGTGAGCTTTTAGGAAAATTGCAGAATGGAAATGCCA,,G,T,1,rs33524917,,,,0,,,,1,0,0,,,
gUNCHS014174,5,42604236,-,GTCTTGGGGTAACTCTAACCAAACAAGTGAAAGACCTGTTTGACAGTAAC,,G,A,3,rs241604288,,,,0,,,,1,0,0,,,
S2T051722102,5,43052574,-,TCCCATCAATAAACTTGTTCCTCTGTCTCTCAAAGTTTGACATTTCTAGA,,G,A,1,,DBA/2,strain group,"DBA/2NCrl, DBA/2NTac",0,A,,,1,0,0,,,
mbackupJAX00580448,5,43583393,+,TCGTTATTTGGCCTTTCGGAGGTAGGGAACAAATAGAGCTCAAAGAACAA,,A,G,1,rs50523484,,,,0,,,,1,0,0,,,
mUNC050096588,5,44265716,+,TGTGTTTTGTGAATCTTTACATGTTCTGTCTGTTGACTCTCTTGTGTTTT,,A,G,3,rs246614477,,,,0,,,,1,0,0,,,
mJAX00580710,5,44780829,-,TCTGGCTCCTGAGTAAAGAACTATGTGGCAGGACTTAAAAGCAGATGAAA,,C,T,1,rs32805408,,,,0,,,,1,0,0,,,
gUNC9081054,5,45055710,+,TAGTCAAAATCCTCTATATCCAGGGAATTGTAAGATCAGGAGTAACTATT,,C,T,1,rs32798264,,,,0,,,,1,0,0,,,
S6Y051823110,5,45577767,+,TGAGCACAAATTTGGCTACAGAGTGAATTCAAAACCAGCCTGGCAACAAA,,A,G,1,rs36541796,,,,0,,,,1,0,0,,,
mUNC050465555,5,45818818,+,GATGCATACCCTATATTAATACAGACATTAGGGCAAAGAGAACGTGCAAG,,G,T,3,rs29780796,,,,0,,,,1,0,0,,,
DT2023174930,5,45958101,+,AGCTCCCCTCCTGGGAGGCAAACACTGAGAAGGCTCTGGGAATCCTTCCA,,T,C,1,,129T2/SvEmsJ,substrain,129T2/SvEmsJ,0,C,,,1,0,0,SPIKE,,
mJAX00129573,5,46206885,-,ATGAGCATTTTAAGTAGATACTTCAAAAGGGGGAACTGAAAAATCAGCAT,,A,G,1,rs45862176,,,,0,,,,1,0,0,,,
SBC051871452,5,46786304,+,AAGTTTCATTGCAAATCATTCATAATTTTCCATTATGCATGTTTAATAAC,,A,G,1,rs48095895,,,,0,,,,1,0,0,,,
B10050046805,5,46805056,-,AGAGAAGCATCTTGACTTACTCTCCAAAGACAAGCTGCAATGCTAGGTCT,AGAGAAGCATCTTGACTTACTCTCCAAAGACAAGCTGCAATGCTAGGTCA,A,T,1,,C57BL/10,strain group,"C57BL/10ScCr, C57BL/10ScNHsd",0,T,,,1,0,0,,,
gUNC9106514,5,46936424,+,TTGGGCTACAGCTCTAGGAAGCAACTCACAGCAGTTTCTTCCTTGAATGA,,G,A,1,rs48532875,,,,0,,,,1,0,0,,,
D2R051892440,5,47311019,-,GCACTACTGATATTTGGCTGTCAGGTAAGTAGGCAAACCAACTCCTATGT,,C,T,3,,,,,0,,,,1,0,0,SPIKE,,
gUNC9114329,5,47496100,-,TCTTGAATATTCATCTTTATTGTGAGGAATAGTTTTTCTTAATTATTCAT,,C,T,1,rs6382451,,,,0,,,,1,0,0,,,
SSH051911348,5,47783703,+,AACTGTGGAGGGAAAAGGTACTGGTTCCTGCTAGGTGTTCCTCCATCACC,,G,A,1,rs33132536,,,,0,,,,1,0,0,,,
gJAX00581373,5,48261376,+,CATTGCAAGACTATTAAAGTTCTCTATATTATTCTGGGTACAGAAACCAG,,G,A,1,rs37350773,,,,0,,,,1,0,0,,,
gUNC9132499,5,48747160,+,CTTGTGAATAACTATCAGGGCCATGGTACAATATCTTTTCATATTGTCAT,,C,T,1,rs48839116,,,,0,,,,1,0,0,,,
S6H051950125,5,48753135,+,CTCAGGTGTTAAAACGTTGTTCACATGTATGGCCTCTTGTCTAGGAAGAA,,C,T,1,,C57BL/6JOlaHsd,substrain,C57BL/6JOlaHsd,0,T,,,1,0,0,,,
SAJ051966089,5,49152232,+,TAGTTCTTCAGCAAAATGCCCCTTATTTCAGACGGGTTTAGTGCAGAGTT,,C,T,4,rs33297933,,,,0,,,,1,0,0,,,
gUNC9142259,5,49332157,+,TGTGCATAAAATTGTTGTGTCAAACAATGGCTAAGGTTAAAATAATATAA,,A,C,1,rs47493255,,,,0,,,,1,0,0,,,
D6T051975083,5,49377081,+,CTAGCTCTAAGAGATCTCTCTTTTCCTTGTTCACAGACAGTAAGGAGATG,,G,A,1,,C57BL/6JBomTac,substrain,C57BL/6JBomTac,0,A,,,1,0,0,SPIKE,,
SBH051984785,5,49619635,-,CCAAAATTGAGAATATAAAGTCTTGAAGGATTGAAAAACACAATTGTTTC,,A,G,1,,BALB/cAnNHsd,substrain,BALB/cAnNHsd,0,G,,,1,0,0,,,
SSH051995378,5,49884465,+,TCTTGGGGCACATCCAAGATTTTTGCCCCAGTGTTAGCATCTATAAAATA,,C,T,2,,129S2/SvHsd,substrain,129S2/SvHsd,0,T,,,1,0,0,,,
gJAX00129860,5,50060784,+,AGACGTACTTAGCATGCGCTTTAAGTTTGGCGTCAGATTTGTACTTCACG,,A,G,1,rs3692841,,,,0,,,,1,0,0,,,
DX1030540125,5,50329958,+,CCCTCCAGAGAATGTTTCTAACTCTGAGTCTGATTCAAATACCCGTCCTC,,C,A,1,,129X1/SvJ,substrain,129X1/SvJ,0,A,,,1,0,0,SPIKE,,
DFT052022931,5,50573279,+,CATCTTCTGAAGATGCTAACTGTTCTCCCCTAGGTAAAATGCTATTTTCC,CATCTTCTGAAGATGCTAACTGTTCTCCCCTAGGTAAAATGCTATTTTCG,C,G,1,,FVB/NTac,substrain,FVB/NTac,0,G,,,1,0,0,SPIKE,,
SAH052029235,5,50730875,-,TCCATGCATGCCTTTGTGCATATGTACCATGTGCAATCACCTGCCAGTGG,,A,C,1,rs250772003,,,,0,,,,1,0,0,,,
mbackupUNC050100821,5,50882383,+,ATATAGCTCAAGTCTACAAACATGGGCCCTGGTATTTGTTTTGGCTTCAC,,A,G,1,rs50671928,,,,0,,,,1,0,0,,,
DSR052045823,5,51145586,-,CCTGCTAGATCAATTTAGGACACAGTATAGACCACTGGGAATTCTCCTGC,,A,G,2,,129S2/SvPasOrlRj,substrain,129S2/SvPasOrlRj,0,G,,,1,0,0,SPIKE,,
S3R052058643,5,51466095,-,TTCAACTGTGTTGGATGTTCTGGACATACACTTTTAGCCTTCAGCTGTGA,,G,T,2,,C3H/HeNRj,substrain,C3H/HeNRj,0,T,,,1,0,0,,,
gUNC9173622,5,51556891,+,CTTTGTATAGAGGATTCCCAAATGTTTGCTTTCAGCAAACTAATGTCTAC,,A,G,1,rs37043927,,,,0,,,,1,0,0,,,
SBB052072056,5,51801410,+,AGCAGTCATGTATGAGCATAAATAAGCAAAGTGAGTTCACACCAAAAGAG,,G,A,1,rs37618732,BALB/c,strain group,"BALB/cByJ, BALB/cByJRj",0,A,,,1,0,0,,,
S6J052074566,5,51864151,+,AAGCACAGTATCCTGTCTAAGACAGTGTTACAATAACCAGACGTGACTGG,,G,A,1,rs1132936773,C57BL/6J,substrain,C57BL/6J,0,A,,,1,0,0,,CC,CC
gUNC9177947,5,51954445,+,CAATGGAATGCAAACAGAGGTCATAGGGATGGCCAAGAAACTACTTTTAA,,C,A,1,rs50990456,,,,0,,,,1,0,0,,,
UNC9185559,5,52507565,+,CTGGCCGTTAGAACCATATGTTCATGTTACTAGACACGTATGTGACAGAG,,G,A,1,rs29506550,,,,0,,,,1,0,0,,,
UNC9186153,5,52537504,-,TCCACTGACCTTTCCATTCCTATTAAGATAGGAATTAAGAAATTAAGAAA,,T,C,1,rs29774781,,,,0,,,,1,0,0,,,
SS6052101881,5,52547027,+,TGAGAATGCTAAGCCTCTAGCTCTCTCAGAGCAGCCCCTGCAGGAAAGAA,,A,G,1,rs46333450,,,,0,,,,1,0,0,,,
UNC9186613,5,52564001,-,TCTCTTGCCCGTAGGAGCCTAGTAAATGGAACATTTCTGGAAATCAAGGA,,G,A,1,rs48663607,,,,0,,,,1,0,0,,,
B10050052583,5,52583880,+,AAAGGAAAGAACAGAGTCAGGACTCATGTTCCTCCAGAAAATGCTAAAGA,,C,T,1,,C57BL/10,strain group,"C57BL/10ScCr, C57BL/10ScNHsd",0,T,,,1,0,0,,,
UNC9187011,5,52592000,-,ACAATTTGAGTAGGCCAGCTTATAGCTTCTCTCCTTTCCATGATCAACTA,,G,A,1,rs29780088,,,,0,,,,1,0,0,,,
gUNC9188232,5,52674205,+,CTTCCTGAAAGAAAGAGAAGTGCACACTTTCTTTTCCCCCTTCCCTGTGG,,T,C,1,rs33514371,,,,0,,,,1,0,0,,,
UNC9188232,5,52674205,+,CTTCCTGAAAGAAAGAGAAGTGCACACTTTCTTTTCCCCCTTCCCTGTGG,,T,C,1,rs33514371,,,,0,,,,1,0,0,,,
UNC9188989,5,52715618,+,CACTTCTTAAAGAGCCAGTCACCACTAAGCCTCCAGCACATGAAACTCCA,,C,T,1,rs29532909,,,,0,,,,1,0,0,,,
SS6052112351,5,52808780,-,AAGGACACAAGACTTTCCACCAACCAGAAAGGGTGATTTAGTTTCCTGTA,,T,G,1,rs6248036,,,,0,,,,1,0,0,,,
SAC052122324,5,53058102,-,CTGCAAGAGAAGGACAGGGCTTGCTTAAGTCTACAGCCGCTGATGTAACA,,C,T,1,,A/JCr,substrain,A/JCr,0,T,,,1,0,0,,,
UNC9196007,5,53235890,+,TGCCCCTCCCCCAGGAATCCCTCTTTCCTGCTACCAGATGGGCTTTGTCT,,T,G,1,rs29585214,,,,0,,,,1,0,0,,,
SS6052131498,5,53287470,+,GTAGGCTGAGGTAAGCCTGTGGAAGATATCTAATCTCAGGCAAAGACCAT,,A,G,1,rs33129291,,,,0,,,,1,0,0,,,
UNC9196719,5,53293400,-,AATAGAATATAATCCTGACACCCTCTGACTAGTTGTTTTTTGTTTGTTTG,,A,C,1,rs241019777,,,,0,,,,1,0,0,,,
gUNC9197152,5,53324305,+,TAGCAGTGGCTGATATGTATGGAGCTGGGAACCACATAGAAAGGGGGTCA,,G,A,1,rs32938966,,,,0,,,,1,0,0,,,
UNC9197152,5,53324305,+,TAGCAGTGGCTGATATGTATGGAGCTGGGAACCACATAGAAAGGGGGTCA,,G,A,1,rs32938966,,,,0,,,,1,0,0,,,
UNC9197861,5,53367104,+,TACAAATACCAAATGTACTGTCTGGCCAGACCCGGGACATTTTTAGCTTA,,C,T,1,rs29507354,,,,0,,,,1,0,0,,,
JAX00582740,5,53439191,+,CTTTCTCCATTGGTAACTTTGCCCTTTTTGAAATGAATGATGCCACTACA,,G,T,1,rs32931388,,,,0,,,,1,0,0,,,
UNC9201031,5,53611846,-,ATGGGGAAAAACACGTTGCCAAAAGATATTAGGACTCTAAAATATAGCTG,,T,C,1,rs29681555,,,,0,,,,1,0,0,,,
UNC9202462,5,53711882,+,AGAGGATTGCTTTTCTAATCTGAAGCCATTTGAGAGAAACACCTCTGACC,,G,A,1,rs47452357,,,,0,,,,1,0,0,,,
gJAX00582803,5,53940168,+,TCTGCTTATGGTAAAATCTAACTTGACCCAGGGAAATGGCCTGGGAGAGT,,C,T,1,rs48543722,,,,0,,,,1,0,0,,,
JAX00130184,5,54366986,+,ATTGCCTCAGGTGGTCTCTCCTGCATGTGAGATTAGCTGAAAAATTCATG,,C,T,1,rs33237586,,,,0,,,,1,0,0,,,
UNC9210368,5,54390930,-,CTTACCTTCAACTCTTTCTTCTTCATGGAATAACTAGTTCAGAATGTCTC,,A,G,1,rs36872591,,,,0,,,,1,0,0,,,
S6J052176430,5,54410753,+,AATTCTTGAACAAAAGAGGAAATACATTAGCTTACCAGGAGCTGGGTTGG,,A,G,1,rs33160111,,,,0,,,,1,0,0,,,
gUNCHS014424,5,54590348,-,CGTCCTAGGCACTGATCCCTGGCTAGGTAATGGAAGACATAGTTGCCCTC,,C,T,1,rs48900980,,,,0,,,,1,0,0,,,
JAX00582936,5,54696534,+,TGAACATTCACAAAGATTTAAAGTTTAAGGACAGAGAAACTGCAGTCGGC,,G,T,1,rs29507515,,,,0,,,,1,0,0,,,
JAX00582948,5,54711395,+,TAGTAGGCACTAAGTCTTAATTCCCCTTCTCCTGCTGAGAAATGAAGAGG,,C,A,1,rs33572423,,,,0,,,,1,0,0,,,
gUNC9215457,5,54789217,+,CAGTGACCTGCCCATTGGTTAGAGGGTGTTTGGAAGTCCACTGTTAATAT,,A,G,1,rs33605976,,,,0,,,,1,0,0,,,
UNC9216853,5,54893270,-,ATTGTCTACCACTAAGACAACTCTGTCACCAGTGTGCATGCAAAATGACC,,C,T,1,rs51730176,,,,0,,,,1,0,0,,,
UNC9217163,5,54906581,+,TCATGTAGAATTAAAGAACACTGCTTTTATGGTGCACTCATCCCTTCTCA,,G,A,1,rs29561116,,,,0,,,,1,0,0,,,
gJAX00130262,5,55411655,-,AGGAATATGTTCCTGTCTCCTGGTCCTAGAGATGTCCACTCATAAGCTTT,,A,C,1,rs33156815,,,,0,,,,1,0,0,,,
JAX00130262,5,55411655,+,AGACCTTAGTGAAGCAGGAATTATGAAGAGGTTGCCTTACATTTTCCTTG,,A,C,1,rs33156815,,,,0,,,,1,0,0,,,
S1L052236957,5,55923943,-,AAACTGCATGGCATTTCACAAATAGTAGGTGCTAAATAAGATGTCTAAGG,,A,G,1,,DBA/1LacJ,substrain,DBA/1LacJ,0,G,,,1,0,0,,,
SBC052239050,5,55976269,+,ATGTAGACCGTGCCACAGCCATCTTGTGCTTGAGTCTTCTAAGTATAAAG,,G,A,1,rs213359174,,,,0,,,,1,0,0,,,
gUNCHS014443,5,56170774,+,GTCTACATTTGGTGGCTGATTATGTGTGGGGAGCCGCCCTCACATTCGCC,,G,A,4,rs232638809,,,,0,,,,1,0,0,,,
backupUNC050366414,5,56271780,-,AAACAGAAGAAACTGAAATCTAATCATAGCAGGCAATAGCAGCAGCAGAG,,C,A,1,rs29541946,,,,0,,,,1,0,0,,,
mUNC050467525,5,56540465,+,CAATTTATGAAATTCTTGGGCAGATGGATGTATCTGGAGAAAATCATCCT,,C,T,4,rs50073562,,,,0,,,,1,0,0,,,
SBR052266022,5,56650550,-,GTAGTTAGGAACAGAGGTGGCACATCTGTGATAAACAAGGAAATTGTAAG,,T,C,1,rs46019978,BALB/c,strain group,"BALB/cByJ, BALB/cByJRj",0,C,,,1,0,0,,,
gUNC050977354,5,57098878,+,TACAGATGTACTAGATATTGTATCTACTAGAGGGAAACATTTTGCAAAGC,,G,T,1,rs37152523,,,,0,,,,1,0,0,,,
UNC9251154,5,57456935,-,ATGAAGAGCATTTTGGTCAAATATTCCAAAGCTCAGAAAGAAAAGAATAA,,T,G,1,rs52261502,,,,0,,,,1,0,0,,,
SS6052300564,5,57514108,-,TCTTCCTCACTGATAATGGCCATCTGTAAGTCTCAGAGACAGTAACTAGG,,A,C,1,rs46831707,,,,0,,,,1,0,0,,,
UNC9252175,5,57563097,+,AAGAATAAAAAATTAATGCTGGTTTCTTTCTGGGGTGAAAGACTTGAAGA,,G,A,1,rs29542894,,,,0,,,,1,0,0,,,
mUNC9254832,5,57853669,+,TTATCCAAATATTTTGAGAGTAAAATTAATTATATGCAATATACATGAAA,,C,T,1,rs33443859,,,,0,,,,1,0,0,,,
gUNC9257267,5,58092321,+,ACATTTACAGCAGAGGACTGCCGGGTCTGGGTTTAGTCAGAGAGGAAGCA,,C,T,1,rs51653742,,,,0,,,,1,0,0,,,
gUNC9260127,5,58290674,+,GGTTGTTCATAGGGTTTCTGTGACATAACAACTTTCTTTCTAGCCCTCAG,,C,T,1,rs29667277,,,,0,,,,1,0,0,,,
S3C052337206,5,58430174,+,TGCAGTAGGAATTACATCCCACTCGTCTTGGAAACTGGTTGCCTTTTAGG,,T,G,1,rs33030547,,,,0,,,,1,0,0,,,
S1H052345227,5,58630692,-,TTGATGTATGCACAGCACAACTACAATAAAATATAACTTAAATGGTTTTA,,G,T,1,rs33022011,,,,0,,,,1,0,0,,,
S6N052350577,5,58764438,-,AAATTTTAGCAGATGCCTATGATTGTATACTGAGCACAGGTAGAAATATT,,A,G,1,rs242753411,C57BL/6NJ,substrain,C57BL/6NJ,1,G,,,1,0,0,,,
UNC050370128,5,58829444,-,ATGTTAGCAAAAATATTTCAGGGCAAAATTTGAATTGTAATGCTTGTGTA,,A,G,1,rs33384921,,,,0,,,,1,0,0,,,
S2C052359926,5,58998163,-,AATTTAAATACTCTGATGAACCACGTTTGGTTGTTTCCTTCTCTTTTAGG,,T,C,1,,DBA/2NCrl,substrain,DBA/2NCrl,0,C,,,1,0,0,,,
gUNC9273393,5,59299820,-,TGGGGATTCTGCCTAGCCAAGGAAGGTAGTCTCTTCATTTTCCATGTCCC,,A,G,1,rs33669524,,,,0,,,,1,0,0,,,
gUNC9283770,5,59948457,+,GCACAACCTACCTGTAACTCCATGTCTTAGATAGATGATGCTCTTCTTTG,,A,G,1,rs227559583,,,,0,,,,1,0,0,,,
gUNCHS014471,5,60310753,-,TTTCTTTTAGCTACTTAGAGAAATCTTGGAATTCTCCCGAGAAATGAAAG,,T,C,1,rs29526357,,,,0,,,,1,0,0,,,
UNC9292055,5,60576885,+,GACAAACTAAAAATAGTCCTCACTTTAAAATGTCTAGCTCCAGGAAACGG,,G,A,1,rs108865262,,,,0,,,,1,0,0,,,
mUNC051678125,5,60851269,-,GGCATTAGTCAGAGCTTCAGATATTTTGAAGAAGACGGGGCTGAAAGATT,,T,C,1,rs250999351,,,,0,,,,1,0,0,,,
B10050060978,5,60978165,-,GACTTCAGTTTCAATATTTCTTGAGTCTTGTTGACTTGTATTGATTTTGA,,G,A,1,,C57BL/10,strain group,"C57BL/10ScCr, C57BL/10ScNHsd",0,A,,,1,0,0,,,
gJAX00583968,5,61567649,-,TGAAAGCTTGTCTAGGAGAACATGTACTTCCATGGGAGTTGTTGATAGAA,,G,A,1,rs51430103,,,,0,,,,1,0,0,,,
JAX00583968,5,61567649,+,ACTCTGTTCCATTGCCTGTTGAAAATGAACTAAGGTGTTAAGAAAAACAC,,G,A,1,rs51430103,,,,0,,,,1,0,0,,,
SS6052470923,5,61773098,+,GGAGAGGCATGATCAGGAATACAAGGAGATGGGATTGATATACAGGGTCA,,T,G,1,rs33233423,,,,0,,,,1,0,0,,,
UNC9309125,5,61998127,+,GTCCATGAGGTAAATTAGAAGAGGAAACAACTCAAAGAGGTGGCATTGGT,,A,G,1,rs33344902,,,,0,,,,1,0,0,,,
gUNCJPD002223,5,62054072,-,TTCTATTTCTAATCAATCAGCACCATCTTTGCATAGTCTTTCATGAACTA,,G,A,2,,,,,0,,,,1,0,0,,,
SAC052493560,5,62339015,+,AGTTTAGCTCATGCCAATTCTAATCTCCGATTTCAGTGAAGATAACCAGA,,G,A,1,,A/JCr,substrain,A/JCr,0,A,,,1,0,0,,,
gUNC9315818,5,62563276,+,AATAGAATTCAAAATGAAGTACTCACTGTAAAAAAAATGCCGTATTGTAA,,A,G,1,rs50800056,,,,0,,,,1,0,0,,,
JAX00584163,5,62851299,+,AAGCTAAAAACAGTAGATATTTTGTGTTGATTACATTACTCTTTTTTTCT,,A,G,1,rs31438322,,,,0,,,,1,0,0,,,
UNC9319514,5,62853010,+,ATCTTAAATGATGAGCCTAGTGCAGACTAGGCACTAAGTATGTCTGACTA,,T,C,1,rs45805111,,,,0,,,,1,0,0,,,
SS6052522144,5,63053618,-,GTAGAAAATCATCATTAGCATTCAACTACAAGCCACAGCCTCCACCCAAA,,A,G,1,rs33355781,,,,0,,,,1,0,0,,,
SS6052522334,5,63058364,+,CCTGACCTGGAGTAATTGCCTTTTACAAGTACATCCTTTAGAAGTCAGTT,,T,C,1,rs33288529,,,,0,,,,1,0,0,,,
mUNC9323394,5,63178754,-,ACTTCCCTATGAAACTATGATGCTTTAAAAGCCCAGAATGAGCTTTTCTC,,C,T,1,rs50204427,,,,0,,,,1,0,0,,,
UNC9323394,5,63178754,+,GTCTTATGGGAAACTTACATGCATTCTACTTTAAAAGAATCTTACTCTCA,,C,T,1,rs50204427,,,,0,,,,1,0,0,,,
UNC9325489,5,63355039,+,TGAAAATGTTAAAAAGCTTTGCTTAAAGTTATGTACATGATATTTGACGT,,C,T,1,rs29568375,,,,0,,,,1,0,0,,,
UNC9330658,5,63784298,-,AAACCAAAACAGTAGAAAGACAACATACAAATGAATGAATAAATTGACTG,,A,G,1,rs33606168,,,,0,,,,1,0,0,,,
gUNC9332840,5,63941392,+,GCATCATTCACTTAATCTCAACTGCAGTGCAATGGAAAAGTTGCAGGTGG,,T,C,1,rs33060036,,,,0,,,,1,0,0,,,
SS6052559814,5,63995365,+,GAACATACTGAGGAAAAGCTATACGTCCATCTTGTTTCTACTAGTGACAG,,C,A,1,rs46489768,,,,0,,,,1,0,0,,,
SS6052568396,5,64209911,-,AGATGCCAGATAAAATGATCACTAGTCCCTCATGGAAACATCGCTTCAGC,,A,G,1,rs33276741,,,,0,,,,1,0,0,,,
gUNC9337724,5,64289023,+,AAATAATGCAAACGCCGTCTCCATCTCTGCATTTTCTCTTGATCAGGAGT,,G,A,1,rs33453914,,,,0,,,,1,0,0,,,
SS6052573386,5,64334663,-,GTACATTCTAAAGCCCTGAAGTTACAGAACCCTGCTGGGAAATGAATGGA,,G,A,1,rs37571398,,,,0,,,,1,0,0,,,
UNC9339730,5,64415590,+,TACAAATGAAGATGTGACATTATTAACCCTACAAGAATGTACATTTTATA,,C,T,1,rs107808092,,,,0,,,,1,0,0,,,
JAX00130937,5,64430761,+,GGTCAGGGTGCCAATAAACCAGGTTGTTTTGGCCACACCCTGTGATGTAT,,T,C,1,rs33395483,,,,0,,,,1,0,0,,,
UNC9341104,5,64534512,-,TGCTCATTTTATAAGCAAGTCCATCATGCACCAGAGTTCTCATGCATGCT,,A,G,1,rs251385761,,,,0,,,,1,0,0,,,
SS6052586490,5,64662271,+,GAGAAGAAATTGAAAGTAGGGAGTGGAAAGTTGGAGCTTTCTGGTGGGGT,,C,T,1,rs51556026,,,,0,,,,1,0,0,,,
JAX00130956,5,64662729,+,ATTAGGAAGTATTAGTTCCCGTTTCAGCCTCAAGCATCAAAGCCATTTGT,,C,T,1,rs29569530,,,,0,,,,1,0,0,,,
SS6052588744,5,64718616,+,TTGCTCACTATCCTACAGGCAGCATTTCAAAACATTTATCGCAAGATGGG,,G,A,1,rs33607077,,,,0,,,,1,0,0,,,
SS6052592557,5,64813938,-,CTGTGCCTTCCACGTAACTAACACGTAAGCTAAGACCTGTAAGAACTGGG,,T,C,1,rs29821326,,,,0,,,,1,0,0,,,
SNJ052594151,5,64853791,-,GTAAAAGTTGTCATTACACAAGTCTGTGACCTGTGTTTAATCCCAGGAAT,,C,A,1,rs259011475,,,,0,,,,1,0,0,,,
gJAX00130999,5,65257777,-,GACTGTGTTACTTACATCTTGAATTCTGAGTACAGAGCAGGGAAGCCACA,,T,C,1,rs31453409,,,,0,,,,1,0,0,,,
D3C052610767,5,65269198,-,ACAGATCACTCTGCATTAACCTCACCTTCAAATGCTACAGTTGGATTGTT,,A,G,1,,C3H/HeNCrl,substrain,C3H/HeNCrl,0,G,,,1,0,0,SPIKE,,
gJAX00584712,5,65708851,-,TCAAGAAGGGTTATATATCAATGGTCTACATTGGACCAGAGTGGCAAGTC,,C,T,1,rs31464733,,,,0,,,,1,0,0,,,
gUNC9368633,5,66566405,-,TAGTTTCTAATGTTTCAGTCACCTGTGGTCAATCATGGTCTGAAATATTA,,T,G,1,rs214189246,,,,0,,,,1,0,0,,,
gUNCHS014588,5,66772840,-,TGGGAGAGTTTAAATGTAACCCAAGAACCCACCTTCTGATTCTATCGCAG,,T,G,1,rs33741565,,,,0,,,,1,0,0,,,
DS6052678628,5,66965708,+,GTGTCTTAGATACCATCAGTCATCCACAGGCCCTTGCTGGCTCCCATTAA,,C,A,1,,129S6/SvEvTac,substrain,129S6/SvEvTac,0,A,,,1,0,0,SPIKE,,
SNT052684133,5,67103329,+,GCTCTCTCTGCACAAAGAACACTGCAGACTGCAATTTCCCTGCTTACCTG,,C,A,1,,NOD/MrkTac,substrain,NOD/MrkTac,0,A,,,1,0,0,,,
gUNC9380201,5,67307011,-,CCTCCTGCCTCCGAGCCGCCTGCCGCGCCAACTGACTCCATAGACCGGAC,,G,A,1,rs29550020,,,,0,,,,1,0,0,,,
B10050067409,5,67409797,-,CCCTTGTCACAGAGAAGTCTTCACTTCCCTGGAGTCTTTTTTGGGGAGAT,,C,T,1,,C57BL/10,strain group,"C57BL/10ScSnJ, C57BL/10SnJ",0,T,,,1,0,0,,,
UNC9382069,5,67440544,-,CTAGCTCAGGGAATGGGTTCATTCTTTGGTGGGTTGTTGACAGGCGTTGG,,G,T,1,rs31488969,,,,0,,,,1,0,0,,,
S6T052699463,5,67486581,+,GACTTGGTCTGCTCAGCTTTGCACACTGTAACATTCCATAAATATAACAG,,T,C,1,rs31491138,,,,0,,,,1,0,0,,,
S6N052701913,5,67547848,+,GATTCCATTGAAACAAAGGAACCAACTTCTTTGGGAGTCCTCTCAACCCT,,C,T,1,rs241859617,C57BL/6NJ,substrain,C57BL/6NJ,0,T,,,1,0,0,,,
gUNC9395243,5,68354163,+,CTCCCATAGCCCCCACAAGAGAATGGTCAGTAGTCATTTAAGCAATGGCC,,T,C,4,rs246054929,,,,0,,,,1,0,0,,,
S2T052734772,5,68369303,+,ATTCCTCTCTGTAACTGAGCTGATTATATGAGTTATTATTTCTGGTCTTA,,C,T,2,,DBA/2NTac,substrain,DBA/2NTac,1,T,,,1,0,0,,,
gUNC050470895,5,68571441,-,ACTATGTATCAAGCAGAGTGCTATTCCATAAGCAATACAACCACCACAGT,,T,G,1,rs36950814,,,,0,,,,1,0,0,,,
gUNC9410407,5,69546157,-,GTCTTGTTTATACTTTCTCCAAACATCACGTGTGCTCCCATGGGTCTTAC,,A,C,1,rs214639720,,,,0,,,,1,0,0,,,
mbackupJAX00131367,5,70156650,+,CAATGTGTCCCTTGGGTTAGAAGACAAAAGCTAACTTAGCTGTGGTATAA,,C,T,1,rs33496148,,,,0,,,,1,0,0,,,
mUNC050113959,5,70414081,-,TTAAAGAATCTGGTACAAAGGTTTTTTTTTATCCTAGTCTATACTTTTAT,,T,C,3,rs49198277,,,,0,,,,1,0,0,,,
gUNC9426686,5,70891213,+,GATGAAATATTATACAGAGGGTAAATAAGTCCACAATTCTGCCTATAGAT,,T,G,1,rs230375046,,,,0,,,,1,0,0,,,
SBJ052840500,5,71012511,+,GAAAATATAAAAGAATTAAAACATTTGAGTGAGCCTTATGAGATTCCAAT,,T,G,1,rs246557480,BALB/cJ,substrain,BALB/cJ,0,G,,,1,0,0,,,
SBH052864962,5,71624052,+,AAAAGCAAAACAGACAGCTATGAACCAATCCATGGCAGTCGCATAGGACA,,C,A,1,,BALB/cAnNHsd,substrain,BALB/cAnNHsd,0,A,,,1,0,0,,,
D6R052870200,5,71755010,-,ATCCCTTACTATACTGCAAGCTCCTAATTGTCAAGCATCAACTCCAGTGG,ATCCCTTACTATACTGCAAGCTCCTAATTGTCAAGCATCAACTCCAGTGC,G,C,1,,C57BL/6NRj,substrain,C57BL/6NRj,0,C,,,1,0,0,SPIKE,,
S3H052870685,5,71767147,+,CCTTGATTTTACCTCAGGAGTTCATGGTGACCTGCTCCTAGAAATCTGTA,,C,A,1,rs265917521,,,,0,,,,1,0,0,,,
SAJ052870860,5,71771510,+,GTGGCACTGTCTGTTGTTAATGATCCTAGTCTTCTTTCAGCTGTAGTTTT,,C,A,1,rs250618485,A/J,substrain,A/J,1,A,,,1,0,0,,CC,Not Fixed
gJAX00131489,5,71781041,+,GTGGTTTTCAAGGAACCCTTCAAAAGGCTTCCAACAAAGTTTCCTCCCAA,,C,T,1,rs36448046,,,,0,,,,1,0,0,,,
S3H052874699,5,71867487,-,ATGACATCCCCAATCAGTAGTAAGAAATAATATAAGAAAACCCCTGTGTG,,A,G,1,rs214299500,,,,0,,,,1,0,0,,,
B10050071916,5,71916820,+,GTGCTGGCCATGTATTTCAGCTTAATGGCTCTCGTGATACATCTCAAATG,,G,A,1,,C57BL/10,strain group,"C57BL/10ScSnJ, C57BL/10SnJ",0,A,,,1,0,0,,,
DFR052879077,5,71976948,+,AACCGTGCAAGGGAACATAAATATACATGCACAGGCTTTAGATAGGCTGT,,G,T,2,,FVB/NRj,substrain,FVB/NRj,0,T,,,1,0,0,SPIKE,,
gUNC9438468,5,72109956,-,CAAGAGCAGTATAAACACTTAGTTAACAGTTAACAGGGCGGTCTCTCCAG,,A,G,1,rs33098155,,,,0,,,,1,0,0,,,
S2H052907644,5,72691100,-,TCTCACACCTGGGTTGGTTATGCATTCTACCTCATTTGCATGTTCCTCAT,,G,T,3,rs49641565,,,,0,,,,1,0,0,,,
S3N052910537,5,72763432,+,CTTAGAAATTATCAAGTAAATTATTGAAATTTACCAAGTTTGAAAATAAC,,G,A,2,,C3H/HeNHsd,substrain,C3H/HeNHsd,1,A,,,1,0,0,,,
S2T052911947,5,72798696,-,CACAGGACTGTGTCTTCTATGCTGTGTATTTCATTTCCATGCAAAAGCCC,,A,G,1,rs46289638,,,,0,,,,1,0,0,,,
gUNCHS014714,5,73124779,+,TGATATGCACGTTCCCCGTGTTGGTCCCTGAATATCTGAAACAACAGAAC,,G,A,1,rs46247217,,,,0,,,,1,0,0,,,
S3H052936367,5,73409182,+,AATCAATAGAAAGAGAACCAATGGCTGAAAGTTGTGCTCTCACCATTGCA,,C,T,1,rs46317941,,,,0,,,,1,0,0,,,
S3H052936542,5,73413565,-,AGCCCATTGTCTGTTACTACTTAACAGGAGGGAAAGTTGAAATGGAACTG,,A,G,1,rs50427113,,,,0,,,,1,0,0,,,
S3H052937149,5,73428749,-,CAAGGTGACGCTTCCTTAGGAACTTAACACACACACAGCAATACTAAGAC,,G,A,1,rs47390381,,,,0,,,,1,0,0,,,
S3H052942721,5,73568028,+,GCAAGCCAACAAGAGTAATAGAGCCAAGGAAGAGCATATTCCTTCAGCAA,,T,C,1,rs49243088,,,,0,,,,1,0,0,,,
S1H052945805,5,73645142,-,AGAAGTTGTGAAAACAGAGGAATGCCTGAGCAAATACTTCATTAACTCTT,,C,T,1,rs228233720,,,,0,,,,1,0,0,,,
mbackupUNC050383757,5,73728084,-,TGTCTGTCTTTACACCTACCAGATAGTTCGTCTTTTCTCTAAAATGTCAC,,C,A,1,rs37447936,,,,0,,,,1,0,0,,,
S2R052954161,5,73854025,-,GCTGGATGGAACTTGGGTCCTGATGTTGTGGCGAGCATTTTCCAAACGGC,,C,A,1,rs48324077,,,,0,,,,1,0,0,,,
S2J052978671,5,74466792,-,AAAGTGACTTACTTTCATGGCATAGCTTATGCAAGAAGAGGATATACTGT,,C,T,1,rs236250648,,,,0,,,,1,0,0,,,
gUNC9475243,5,74730464,-,TTTATGAATTGGTTAGAAAAGTGATCAAATCATTTAGTTCCTAAATGACT,,G,T,1,rs33106755,,,,0,,,,1,0,0,,,
S1J053000362,5,75009054,+,AGTTTTTAAAGAACAGTCTTCTGAAAATGATTTTGTTCACAAACCCCACA,,A,G,1,,DBA/1J,substrain,DBA/1J,0,G,,,1,0,0,,,
gJAX00586244,5,75250020,-,ATGTGAATGCAAGTACATGTGTGCTACAGTGAGTGTATCCAGAGGTCAGA,,C,T,1,rs33728340,,,,0,,,,1,0,0,,,
S1L053017780,5,75444504,-,AATGGCTATGCATTCCCCGAGCAAGCTGTCCATAAAGGCTAGCTGTTAAA,,G,A,1,,DBA/1LacJ,substrain,DBA/1LacJ,0,A,,,1,0,0,,,
gUNC9489781,5,75709740,-,AAGATGCCAGTTATCCAAGGTACCTGTTGAACTTGTTGAACACCAACATC,,A,G,1,rs29524391,,,,0,,,,1,0,0,,,
SBC053028723,5,75718089,+,CCAATTTGCAGGAGGGTCATGGGCATCCTTAGAGTCTGGAAACCCTTGGA,,A,G,1,rs37011070,,,,0,,,,1,0,0,,,
gJAX00131867,5,76783431,-,ACAAATAGAGGAAGATAATGTGAGCACCTAAGGCTCTAGAGCATCATGTA,,G,A,1,rs33184186,,,,0,,,,1,0,0,,,
S3H053072631,5,76815798,-,CAAAGCACTCAAGATTCTGGTCTTTCTCGGGAGATAACTAACTGGAGCCT,,G,A,1,rs49641361,,,,0,,,,1,0,0,,,
SFH053075071,5,76876775,+,AAAACAGTCTCGGACAGGGGGTGGAACTTGGTTCCAACTCCAGCTCTAGG,,A,G,1,rs217225868,,,,0,,,,1,0,0,,,
B10050077078,5,77078096,-,AAAAACAGGTTCTTTGTATGCTTAAACAATACTCCATCTCGTGGCTCTGT,,G,A,1,rs219222353,C57BL/10,strain group,"C57BL/10ScCr, C57BL/10ScNHsd",0,A,,,1,0,0,,,
gUNC9510172,5,77127866,+,ATACCAAGTGGTCATCCTTGAAAACATACATACAAGTAACACTATATAGA,,C,A,1,rs52406970,,,,0,,,,1,0,0,,,
mJAX00586747,5,77801818,-,CAGATCCCCTTTATTAGTATGGCAAACAGGCATTAGCACCAAAGCTGTCA,,A,G,1,rs51094468,,,,0,,,,1,0,0,,,
S3J053128818,5,78220474,-,CCCACACATCAGTAGGCCAGCTGCAGGCTATTCACATTACTTCAGAATAC,,C,T,1,rs3715999,,,,0,,,,1,0,0,,,
gUNC9527662,5,78404061,+,CCCAGTTGCAGCTCAACTTCTCAGGTATTCTGATACATCCAGGACCACAG,,G,T,1,rs46805846,,,,0,,,,1,0,0,,,
S3J053156245,5,78906139,+,AAATTGAAATAAATACTATCAAGTTAGAATCTCTGCTTATTTTTTCAGTG,,C,T,1,rs218096345,,,,0,,,,1,0,0,,,
S3H053156575,5,78914387,+,CTGACTTGGAGCTTATATTGACTCAGGTTGAAATGCCATGACAATTTTCC,,T,C,1,rs46826242,,,,0,,,,1,0,0,,,
gUNC9537526,5,79123878,-,GATATCTTTCCTAAATAGCTCATACTCAACCCCTGAGAAACAATCAACAA,,T,C,1,rs245391392,,,,0,,,,1,0,0,,,
gUNCJPD002275,5,79437752,+,TGTGGGAGATTCTTTGGCTAAACTCTTGTGTTACTCCAAACATTCCTTAC,,C,A,2,rs1133853445,,,,0,,,,1,0,0,,,
S3H053194829,5,79870731,+,AGGTCCAGAGCTGGGAAGTGAGCAATGTTTGAGCTGATTGATTTATCATG,,A,G,1,rs3722733,,,,0,,,,1,0,0,,,
S3H053198479,5,79961986,+,ACACAGCTCAGAGCTTCAGTCTCAGAGCTCTACTGAAAATATATGTGTGC,,T,C,1,rs36960281,,,,0,,,,1,0,0,,,
gJAX00587024,5,80162358,+,CACATTGGTGAGAGCTCTGAACAAGAAGCTTTGAAGAAAACAGTCTGCTC,,G,A,1,rs51204673,,,,0,,,,1,0,0,,,
B10050080290,5,80290239,+,TGTGTGGGCAGAACAGGTAAACTTGTGCTATCAAATTAATAGCAGATAGT,TGTGTGGGCAGAACAGGTAAACTTGTGCTATCAAATTAATAGCAGATAGA,T,A,1,,C57BL/10,strain group,"C57BL/10ScSnJ, C57BL/10SnJ",0,A,,,1,0,0,,,
DP3053212741,5,80318543,+,GTTGCGCCTGGGCTTAGATTTTCATTCTTTGCTGTGATACTTTAGTCAGT,,C,T,2,,129P3/J,substrain,129P3/J,0,T,,,1,0,0,SPIKE,,
S2C053215680,5,80392021,-,AATTAATTTTTCCATAGAAAATGTAGGTTTGGGCCCACAACTTTGATGCT,,G,A,2,,DBA/2NCrl,substrain,DBA/2NCrl,1,A,,,1,0,0,,,
gJAX00132181,5,80972919,-,ATCCTTTACCTTTGTGCCATGGAATTGGGTGGACAGCACAGTAGGAAGAA,,A,G,1,rs48042844,,,,0,,,,1,0,0,,,
SAC053251982,5,81299572,+,TATGCTTTGAATAGGATAGGTAATCAAAGTGGGAGGTACAAAGACCTGTA,,G,A,1,,A/JCr,substrain,A/JCr,0,A,,,1,0,0,,,
gUNC9566561,5,81330273,+,CAGCACTGTAGAGATGGAGACTGAAGGTTTAGTTTCTAAGGCAAGCCTAA,,A,G,1,rs221977030,,,,0,,,,1,0,0,,,
DS4053267798,5,81694961,+,TGGAAGTTGAGATCGGGTACATTGAAGACTAACGAACTATAGGTTACGCA,,C,T,1,,129S4/SvJaeJ,substrain,129S4/SvJaeJ,0,T,,,1,0,0,SPIKE,,
gUNC9575602,5,82133874,+,TCATTGATGGTACTCACATACTGGTGTTATCCAACAGCTGGCTATGTTGA,,C,T,1,rs29549147,,,,0,,,,1,0,0,,,
mUNC9578607,5,82360998,-,ATGTAAGACTCTGACCATCTAGAATTGCCAGCGATGTTCACTTTAAGAAC,,A,G,1,rs36297281,,,,0,,,,1,0,0,,,
gUNCHS014892,5,82362051,-,TTCAACTCAGCTGTTCTGGCTCAAACTCCTCTTGAAGCTGACTGATGAAT,,G,T,1,rs33612108,,,,0,,,,1,0,0,,,
S3T053295852,5,82396301,-,AGGTGTGACTTACTCAGCTTATAAGGCAGCTTTAACACAATTAACCACAT,,G,T,1,,C3H/HeNTac,substrain,C3H/HeNTac,0,T,,,1,0,0,,,
S6R053314276,5,82856904,-,TGGCAATGTGTTTACCCATATGGGAAACATTCAAGAAAAATGAGAGTTTG,,A,G,1,rs33446748,,,,0,,,,1,0,0,,,
mbackupUNC051148935,5,83297685,-,CTCTCCCTTTCAAATTCTTCAGTCCTGTGCCTACTTCAACCATAGGGGTT,,A,G,1,rs219450636,,,,0,,,,1,0,0,,,
gUNCHS014690,5,83536726,+,CCACCTGAGGATCCATCCCATATACAGTCACCAAACTCAGACACTATTGT,,T,G,3,rs252143373,,,,0,,,,1,0,0,,,
SBB053347475,5,83686875,-,TTTATTTCCTGGTTTGTCCCAGAAAGTTGTTAGGAATCACACTATTTTTG,,C,T,1,,BALB/c,strain group,"BALB/cByJ, BALB/cByJRj",0,T,,,1,0,0,,,
gUNC9602650,5,84442167,-,TTTTATTACTTTTTAGGTACTCAACCTATATTTGTATAGTTATTCCGTTA,,G,A,1,rs31644370,,,,0,,,,1,0,0,,,
mUNC050135252,5,84662655,-,TTCGCTATGTGTACATTGGTAAGATGATGTGTTTGCATGTGGTGTTTTGT,,C,T,1,rs33672790,,,,0,,,,1,0,0,,,
mJAX00587681,5,85300721,+,TAAGCCTGAATGCTGTTACAGTGAGTTCATAGTACAATCAAAGCCAAGTT,,G,A,1,rs45967961,,,,0,,,,1,0,0,,,
DS4053421307,5,85532688,-,ACTACATCACCACTTCTACCTACATCCTAAAATCCTTTCTTTTCATGTGA,,A,G,1,,129S4/SvJaeJ,substrain,129S4/SvJaeJ,0,G,,,1,0,0,SPIKE,,
UNC9614549,5,85777304,+,GGACTGTCCTAATGTCTCTCTGGAATCTCACAAATCACTATCTGGCAGCT,,A,G,1,rs33444595,,,,0,,,,1,0,0,,,
gUNC9617590,5,86112809,+,TCAGTGGAAGGCTTCACAAGTTTGTGCATTCTAAGAATAAGCAAAGATAA,,G,A,1,rs31657802,,,,0,,,,1,0,0,,,
gICR1649,5,86669353,+,GCCTTAAGAATAGGATCTTGAATAAGAGAGAAAGAACTGAATACTATAAT,,A,G,1,rs255903368,,,,0,,,,1,0,0,,,
mUNC050547848,5,87421541,+,TCCCACATATCTCTATCATTGGGAGAAAAATATAAGGAAAAATATATAAT,,T,C,3,rs33567801,,,,0,,,,1,0,0,,,
mbackupUNC050138498,5,88141414,-,TTCTATCAAATGTGGGGTTAATGAAAATTGTCTCCTAATCTGTAGGTTGC,,A,G,1,rs240863289,,,,0,,,,1,0,0,,,
gUNC9643125,5,88488343,-,GTGTTAAGGAGGTCAGAGTAGTTTGGGAGAAAACCTACAAGAGAAACAAA,,A,G,1,rs247743918,,,,0,,,,1,0,0,,,
B10050088635,5,88635135,+,TTCAACATAACCTTTAAATATACTCAACTTGAGTTTCTTTGTTGTATCTG,,C,A,1,,C57BL/10,strain group,"C57BL/10ScSnJ, C57BL/10SnJ",0,A,,,1,0,0,,,
S2C053545703,5,88642596,-,TGATCAACAACAAGACATCACTTTTGGAAATCCATACCCAGAGCCACCCT,,G,A,1,,DBA/2NCrl,substrain,DBA/2NCrl,0,A,,,1,0,0,,,
D6T053557345,5,88933632,+,ATGTCTAGAATACAGAGTGAACATGTGGGTCTCTGGCAGACCTCATATAC,,G,A,1,,C57BL/6JBomTac,substrain,C57BL/6JBomTac,0,A,,,1,0,0,SPIKE,,
DBR053559758,5,88993950,-,AAAGATTTGGTTCGGGTGGAGGAGACATCAAAGACCTGAAAACAACTGCG,AAAGATTTGGTTCGGGTGGAGGAGACATCAAAGACCTGAAAACAACTGCC,G,C,2,,BALB/cByJRj,substrain,BALB/cByJRj,0,C,,,1,0,0,SPIKE,,
mbackupJAX00132786,5,89027292,-,AAGTCCCTACCACCTGAAATCTATAGAACCATGGGACAGATTAAGATAGC,,C,T,1,rs33216111,,,,0,,,,1,0,0,,,
SFH053565492,5,89137312,-,GGGTGGCAACAAAACACATTTGGTCTCTGCAAACCATGCCCAGGGGTGTC,,T,C,1,rs29546191,,,,0,,,,1,0,0,,,
SFC053586835,5,89670880,+,TCCACCATCCCTTGGCCATCCTGATGAAGAGACAATCCTTGCTTGCTCAA,,G,T,1,rs1133749601,FVB/N,strain group,"FVB/NCrl, FVB/NTac",0,T,,,1,0,0,,,
mUNC9662032,5,89883442,+,GGAGGAGGCGGCCGCCTAGGAGGAGGGAGGAGTGGGCCGCTCGCCCGCTC,,C,T,3,rs251753097,,,,0,,,,1,0,0,,,
UNCHS014987,5,89911274,-,ACACCAAATGTTACCAATGCCTCAAATTCTGACTTAGAATGGGATCTGAG,,G,A,1,rs37486821,,,,0,,,,1,0,0,,,
gUNC9666038,5,90183680,-,CTGCACCTTCAGGACACCGATGGGAATTTCTGTGTTCTTATCTGACCTTC,,G,T,1,rs31694272,,,,0,,,,1,0,0,,,
DBC053617007,5,90425181,-,TGACTCACTTGTTATGAAATGTGACAACATCCAAATGTGGTCCCTGCAAA,,C,T,1,,BALB/cAnNCrl,substrain,BALB/cAnNCrl,0,T,,,1,0,0,SPIKE,,
S6N053627282,5,90682065,+,ATCAGGCATATAGCCAAGTAGTTTAAGGCAGAGCCTTGTGACTCATGCTA,,C,T,1,,C57BL/6NJ,substrain,C57BL/6NJ,0,T,,,1,0,0,,,
SS1053638846,5,90971154,-,GGCCATCCTAGGCTACATAAAGAGTTTGAGACCATTCTAGGCTACATAGT,,A,C,1,rs31732066,129S1/SvImJ,substrain,129S1/SvImJ,0,C,,,1,0,0,,CC,CC
gUNC9678931,5,91180078,+,TTCAAGGTCACTGGAGGTTTTCCCTAAAAGAGAATCTTGGGACCAGTATC,,C,T,1,rs31734431,,,,0,,,,1,0,0,,,
DAH053666788,5,91669720,-,CTTCTGTTAGTATTTCCTGGTTGGATGATAGAGTCATCAGCCCTTCAATA,,A,C,1,,A/JOlaHsd,substrain,A/JOlaHsd,0,C,,,1,0,0,SPIKE,,
mUNC9688042,5,91774652,+,TTCATCCTTCAGATTATATCTTCTCCTGCCATAGTCTCCTCACCAAAGAC,,A,C,1,rs227875352,,,,0,,,,1,0,0,,,
DT2023266209,5,92121138,+,GGAAATGACACATTATAAAACTAGAAGCTGGTCATGTAAAGGGGAAAGCA,,A,G,1,,129T2/SvEmsJ,substrain,129T2/SvEmsJ,0,G,,,1,0,0,SPIKE,,
gUNC9695589,5,92365529,+,AAGACTTTGAGCTCTCTGACTTTGGACGATTAACCAAAGGGAAGGGCATG,,T,C,1,rs31777646,,,,0,,,,1,0,0,,,
S2J053703893,5,92597331,+,CCCGGCGTGAAGAAAAGAGTGTCCTTTCTGCCCATTTCTTATCAATGTGG,,A,G,1,rs31783175,DBA/2J,substrain,DBA/2J,0,G,,,1,0,0,,E2,E2
D2H053713394,5,92834861,-,AATGGTATCCTAACGACTCAGTCAAAGACAGACTCTGGGGATATCCTATA,,C,T,2,,DBA/2JOlaHsd,substrain,DBA/2JOlaHsd,0,T,,,1,0,0,SPIKE,,
S6R053717161,5,92929037,-,CACATCTCTTCCCTCCCATGTAGTTTATTTCTCCTCACCCTCCATCCTGA,,T,C,1,rs31800380,,,,0,,,,1,0,0,,,
gUNCHS014973,5,92994491,+,CCACTATAGAACTCTGAACCATGGACCCTGTTCTAGTAATAACATGAAAG,,C,T,1,rs50986624,,,,0,,,,1,0,0,,,
gJAX00588898,5,93050760,-,CCTTAACCAGTGATAGCTGACTCAAATCGTGAAGCATATTCAAGCTGGCT,,C,T,1,rs31807515,,,,0,,,,1,0,0,,,
S2J053733081,5,93327029,-,TCCATTTCTCATCAGCTGCCTGCTGGAAGGAGCTCTGAAAATTCTCAGAC,,G,A,1,rs245704369,DBA/2J,substrain,DBA/2J,0,A,,,1,0,0,,Consensus,Consensus
DIV050094326,5,94326597,+,GCTTCCCCTCTCCTTTATACAGTGTGTCCGCCATTAAAAATTTGAACCTT,,T,G,3,,,,,0,,,,1,0,0,,,
DIV050095089,5,95089013,-,AATTATGGACATTGGTTTTTTTTTTTTTTTTTTTTTTTTTTTTTTTTTTA,,C,T,3,rs236634108,,,,0,,,,1,0,0,,,
SBT053834758,5,95868958,-,AGCTATCACTCTGATCAGCTATCACTCTGACTCTAGTGTTGTGTCTACTG,,C,T,1,,BALB/c,strain group,"BALB/cAnNCrl, BALB/cAnNHsd, BALB/cByJ, BALB/cByJRj",0,T,,,1,0,0,,,
gUNC9712371,5,95952141,-,CTTTTAACAAGATTCTCAGGAGGTTGAACACATTTTAAAGTCTGAGAGAC,,T,C,1,rs29584494,,,,0,,,,1,0,0,,,
B10050096073,5,96073770,-,AAGCAGAGAACAGAATCCCAGCACCATTCTATAGGCAACTTTTTAGAATT,,G,A,1,,C57BL/10,strain group,"C57BL/10ScCr, C57BL/10ScNHsd",0,A,,,1,0,0,,,
gUNC9719635,5,96574944,+,TAGTTCAGGCTCGTTGCATTTTTATGCATAAAATAAGGAAGTAGGAAAAA,,A,G,1,rs31845939,,,,0,,,,1,0,0,,,
SBH053868685,5,96717127,+,TCCAGTTAGAGAATCGTGCATTTGATTCTTTTTGGAAGCCTAAGCTTCCC,,G,A,1,rs245763971,,,,0,,,,1,0,0,,,
gUNC9726629,5,96944667,-,CTTCAGCCCTTGAGAGATGTGTCCATAGGTATCTGCTTCCATTCTAGGCA,,A,G,1,rs31868497,,,,0,,,,1,0,0,,,
gUNC9737109,5,97735081,+,AGAACAAGTTCTTAACTCATCTTGGGTGTGTAAAGTAGACATTTGTGAGG,,G,A,1,rs29525217,,,,0,,,,1,0,0,,,
S6T053909858,5,97746453,-,CTGCTTTTTCTACTATTATCATTCTTTTCTAATTCCCAGTAGCATTTGGC,,C,T,1,rs31894063,,,,0,,,,1,0,0,,,
gUNC9743510,5,98235193,-,CCTTAGGTAGATTGCTAGGGGTCAGGCTCCCCAGATCAAGTGGAGAAGAG,,T,C,1,rs48402016,,,,0,,,,1,0,0,,,
gJAX00589476,5,98370551,+,CTGCTGAGCAAGACATCTGGATGAGGCGAGGCATGCATCCTTAAAAATCC,,C,T,1,rs31914504,,,,0,,,,1,0,0,,,
gUNC9748843,5,98586182,+,AAATACAGACCACAAAACCCAGAAGACCAAAGAGGAAACAGACTGAGGAG,,T,C,1,rs49709951,,,,0,,,,1,0,0,,,
S6T053944275,5,98606876,-,TCTGATGGAAAGTGACACATTTCTAGATAAGGGTGTAACGCCACAAGGTA,,C,T,1,rs33523841,,,,0,,,,1,0,0,,,
gUNCHS015153,5,99057594,+,GGAAATGTCCACCTGTGCCAATGAGTAAAGGACTTTTCCCACTTTCTCTT,,A,C,1,rs33658167,,,,0,,,,1,0,0,,,
S2J053966741,5,99168532,-,TTTTATAGATGTATGTATATGATGTGTTTCAATCAAATGACCGCCTCCTC,,G,A,1,rs225648031,DBA/2J,substrain,DBA/2J,0,A,,,1,0,0,,E2,E2
UNC9760274,5,99326584,-,TGGGATATCATTGCAAAGACAGCAAAGTTGAGAAATTAAGATAAACATGA,,C,T,1,rs31934175,,,,0,,,,1,0,0,,,
D6J053987399,5,99684990,-,GTGGTCGGTGACTGGGATAAAGGTTTATGAGCAGGTGGTGACAGTCCAGA,,G,A,1,,C57BL/6J,substrain,C57BL/6J,0,A,,,1,0,0,SPIKE,CC,CC
gUNC9770562,5,100011195,+,CTTATCCTCCGTGGTTAAGTTATTTGATGGTCCTCACCCATTTATACCTG,,A,G,1,rs218338536,,,,0,,,,1,0,0,,,
gUNC9771918,5,100105799,+,AAGTCTGCTTTGAACAGTCTAACCTGCCCAGTTCTATTTTTAAAGGTTCC,,G,A,1,rs45647448,,,,0,,,,1,0,0,,,
B10050100444,5,100444301,+,TCTTTAGTTACAAATGTAAACGGCAATCTGCAATGAGTTTCGAGAGAGAA,,A,G,1,,C57BL/10,strain group,"C57BL/10ScSnJ, C57BL/10SnJ",0,G,,,1,0,0,,,
gUNC9777454,5,100538980,-,TTGGCCTAGAGACACAACTCAGCACATTCCACTCGAGGGCTGCTCTTGCA,,C,T,1,rs52288265,,,,0,,,,1,0,0,,,
gUNC9789865,5,101388709,+,TGTCATCATTTGTCTCCCTGTGGCAGTCAGATCTTACTGTTGTAAAATGC,,G,A,1,rs31999950,,,,0,,,,1,0,0,,,
UNC9792580,5,101570689,-,TCACTGTATCCCCTCGCCTGTTTCTTCTGTGAAGCCACAGCACATCATAG,,A,G,1,rs32002551,,,,0,,,,1,0,0,,,
SX1054064359,5,101608975,+,TCTGTTTGTTTTATGACTAGTAGACCAGAGAAAACAGGGAGACACCCAAA,,A,G,1,rs32006510,,,,0,,,,1,0,0,,,
SX1054064491,5,101612289,+,GCTCAGAAAGAAGGACTGAGCTCAGACACAAATAAGAAACTACTTATGTT,,A,G,1,rs244119715,,,,0,,,,1,0,0,,,
S3N054065868,5,101646705,-,ACAGATAAAGTGGCAGGGTCACACTGCAGAGCAAACACTTAACAAAATGG,,G,T,1,,C3H/HeNHsd,substrain,C3H/HeNHsd,0,T,,,1,0,0,,,
B10050101649,5,101649426,+,TGCTTTTCAGAGTTGAATTCACTAAGGCACCATGAGCATAAGGAAGCGCA,,G,A,1,,C57BL/10,strain group,"C57BL/10ScSnJ, C57BL/10SnJ",0,A,,,1,0,0,,,
UNC9793754,5,101654222,+,CCTACTACATTGCATGGTAGAAACCCACTCCCTCCAATGAAGAAGGACTC,,T,C,1,rs32009543,,,,0,,,,1,0,0,,,
gUNC9794097,5,101680232,+,GTACTGCAGACATCTGGTCTCCTAGCTGTCAGTGTTAACTGCAGATACTG,,T,C,1,rs32008697,,,,0,,,,1,0,0,,,
UNC9794802,5,101713584,+,CAAGGCTGAGCAGCGGACCCAGCTGGGTGTTGTTGATGACCTGGTAGTGC,,A,G,1,rs32003930,,,,0,,,,1,0,0,,,
gUNC9795778,5,101779623,+,GTGGTTTCATTTCCAAGTGGAAACTCAAGCCTTTGTTCCCATAGGGTCCC,,G,A,1,rs32014967,,,,0,,,,1,0,0,,,
gUNC9798667,5,101967482,+,CTCAATTAAAGACATTCTAGTTATCCATGGGCTAAGATGAACATCTCAGA,,T,C,1,rs36450918,,,,0,,,,1,0,0,,,
S3J054090690,5,102267258,-,CTGGGAACCAGCAACTTGGCATCCATTTTCAAAATCACAGTAAAAAGAAG,,G,A,1,rs212601416,C3H/HeJ,substrain,C3H/HeJ,0,A,,,1,0,0,,,
gUNC9808305,5,102496609,-,TTAATTTTTATAAGTACCTTTCACAGGAGTCAATCTCACTTGCATAATGC,,T,C,3,rs242120778,,,,0,,,,1,0,0,,,
gUNC9810514,5,102623974,-,AGGTTTGGCAGTCCAGTGTGTGTGTGCTGTGGGCAGATTTATTATGCTTC,,G,A,1,rs219964198,,,,0,,,,1,0,0,,,
UNC9810514,5,102623974,+,CAAGATAATTTATCTCACTGAGTCTGTTTCTGCATAAATATTTTAAAATG,,G,A,1,rs219964198,,,,0,,,,1,0,0,,,
SFJ054107683,5,102692095,-,GATTTGCTTGTTGCTTCAGGCATGTCATTGAAAGCAGAAGGACAGTTTCT,,T,C,1,rs387594856,FVB/NJ,substrain,FVB/NJ,0,C,,,1,0,0,,,
DX1031048221,5,103018645,-,GCTTTGAATTTCCTTTAATTTGGTCCCTTAATTCGTGAACTCACCAAAGC,,C,T,1,,129X1/SvJ,substrain,129X1/SvJ,0,T,,,1,0,0,SPIKE,,
SX1054135184,5,103379609,+,ATGAACCAAAAGCTGTGTCACTTAGGAGAACATTGAGTTTCCCACACAGG,,C,T,1,rs29581999,,,,0,,,,1,0,0,,,
S3H054135965,5,103399134,+,CCAGACTTCCTTTGACTGAATGTTCCTCCAAATGCTTCAGGCTCCTTGTG,,A,C,1,,,,,0,,,,1,0,0,,,
gJAX00590375,5,103409413,-,AACACTCTCAATCTGAGAAGAGACATTGCATTGTTTGAATATTGAATATG,,G,A,1,rs48850924,,,,0,,,,1,0,0,,,
SX1054141419,5,103535478,+,TGCATAGTAGGTAATAGCTGGAATAGAATCTAACCTCACTTAAGTAAATG,,C,T,1,rs33542735,,,,0,,,,1,0,0,,,
gUNC9826099,5,103600922,-,TGGCAACTATTTATAAGCATCTCTACCAGGCACATCTACCAAAGATAGAT,,C,A,1,rs45756947,,,,0,,,,1,0,0,,,
UNC9826099,5,103600922,+,CAAGGCCAACCCAGGCTACAGAGTTCCAAAGCAGCATAGTGAGAGACCTG,,C,A,1,rs45756947,,,,0,,,,1,0,0,,,
S2R054161296,5,104032405,-,TGCTGCCTGGGTCCGTAGTCACAGGATCTGGATAAATCACACAGACAGCA,,G,A,2,,DBA/2JRj,substrain,DBA/2JRj,0,A,,,1,0,0,,,
gUNCHS015250,5,104194894,+,GCTCTGTGCTTATCTGTGCTTAATGTTCTCCAGGGCATAAGGAAGACTTC,,C,T,3,rs51309502,,,,0,,,,1,0,0,,,
S3H054168187,5,104204693,-,TGATGGAACTCAACAGCCATGACTTGAATCATGACTGCTCAGAAGTCACT,,T,C,1,rs50591356,,,,0,,,,1,0,0,,,
S3H054169607,5,104240195,-,CAGAAGTCCCAGTACTTTTCACATCTGACCAATATTGGGAATTTAGTCCC,,C,T,1,rs33446209,,,,0,,,,1,0,0,,,
SAC054176782,5,104419561,-,AAGTATCCAGCTTATGCAAGCTTTTCAGTATGCAAAGTTAGCCATGTGAA,,T,C,1,rs48802185,,,,0,,,,1,0,0,,,
gUNC9840226,5,104434531,-,GAGGCTAGCCTCGGCTCCATACTGTGTTCCAGGTCAGTTGGGGCAACAGA,,T,C,1,rs47941493,,,,0,,,,1,0,0,,,
gJAX00590733,5,105114475,-,TCAAACTGATTGCTAAAGGCATTCAACCACTCATTTGAAGTGCATTTGAA,,G,A,1,rs48169737,,,,0,,,,1,0,0,,,
S3H054218998,5,105474955,+,TTACACGGTTGCCATCAGTTCTAGCTTTATATCTCTTTCTGTGATGGAGA,,A,G,1,rs51641297,,,,0,,,,1,0,0,,,
S3R054229806,5,105745170,-,TGAAGAATTTTCCAAGCACTGAGTTGTATAACAGCAAAATGCAGGGGGAC,,C,T,1,,C3H/He,strain group,"C3H/HeNRj, C3H/HeNTac",0,T,,,1,0,0,,,
SAJ054237261,5,105931536,+,AGAGAATAGATATTATGTTAAAAATAGCAATGAAGCCAGGTGGTGGTGGC,,A,G,2,,,,,0,,,,1,0,0,,,
SFJ054238047,5,105951196,+,TTTTCTATCTCTAGGAAGGCTTCTGCAGTCCCCACAGGTCAGACCTAGGG,,C,A,1,rs387844321,FVB/NJ,substrain,FVB/NJ,0,A,,,1,0,0,,,
mbackupUNC050167831,5,106038519,+,ACAGTGTCACCACCTACGCACCTAAGTGAGGAAAAACCAAAGTTCACCAA,,T,C,1,rs33135395,,,,0,,,,1,0,0,,,
SAH054252500,5,106312509,-,GTGGCTTGACTTCTCATTTTATTAATAGCATTTGGGAGAACAAAAGATTT,,G,T,1,rs583110693,,,,0,,,,1,0,0,,,
gJAX00133933,5,106378792,+,TTTGTGAACAGTGAAGACAAATAATAGATGGATATTATTGAATAGGGAAA,,C,T,1,rs29635750,,,,0,,,,1,0,0,,,
gUNC9863457,5,106509069,-,ATCAAAGGTGGATCAAGGGTCTAATTTTCCTGAACATCTGTGTAGACATT,,C,T,1,rs33323099,,,,0,,,,1,0,0,,,
UNC9863457,5,106509069,+,GCCTGGGATTCCCCAATAATCTGATTAAGTGTTCACAGGAATTTGCTTAA,,C,T,1,rs33323099,,,,0,,,,1,0,0,,,
JAX00591127,5,106638048,-,ACCTACCTCTGCTTTAGTTGGTTGTGATGTTCAGAATTCAGTAGGGAATA,,T,C,1,rs33463932,,,,0,,,,1,0,0,,,
UNCHS015294,5,106663125,-,ATAATTATTTCAGTTTTATAGCAATGTCATTGCCAGGAAGCAGCTGCTCC,,C,A,1,rs33549801,,,,0,,,,1,0,0,,,
gUNC9867296,5,106882122,+,CACAGGAAGACAGAGAACAGAATCCACTGACTGACAATATTTACATGCAA,,A,G,1,rs29562715,,,,0,,,,1,0,0,,,
SFR054277115,5,106927878,+,TGCAGAGTCAGGGTCAAAACCTCTGCTGAATAAGAAGAGACTGCAGCCAG,,G,A,1,rs218708546,,,,0,,,,1,0,0,,,
gUNC9869554,5,107072667,-,CACAGCAGTCTGTGGCTCCAGTACCACAGGATCTACTGCCTCCTAAATTC,,A,G,1,rs33545786,,,,0,,,,1,0,0,,,
JAX00591276,5,107165032,+,GGCTGGTGTCCTTTGGGAACTTCCAAGTTGGAGTTTTATGCCCCTTTCCC,,C,T,1,rs50990797,FVB/NJ,substrain,FVB/NJ,0,T,,,1,0,0,,,
S3J054301931,5,107548280,-,CGCCCTTAAATCTACATTTGGACATTACAAGTTAATAAGTTTAACTAATC,,G,T,1,rs32046287,C3H/HeJ,substrain,C3H/HeJ,0,T,,,1,0,0,,,
mUNC_rs32050737,5,107694671,+,CCTGCTTGAGATTTGATGGGTTTCCTGCACTTAAGAAATACTGTTCTTTC,,T,C,1,rs33120545,,,,0,,,,1,0,0,,,
mUNC050171568,5,107982355,+,GCTTTCTCTGAGAATGATGCCTTGATATGGGAAAACTGGTACTCAGGTAC,,A,G,1,rs247966471,,,,0,,,,1,0,0,,,
gUNC9880190,5,108126721,-,ACATAACTAAGCCCTTATAAGAAGTCTTACTAAAGAAAATTATCTTTTGT,,T,C,1,rs33181431,,,,0,,,,1,0,0,,,
S2C054329824,5,108245605,+,AGTGGTTTGACCTAGAGGGTTGCATGGTATGCCAGTTGTATGTCTAACTT,,T,C,2,,DBA/2NCrl,substrain,DBA/2NCrl,1,C,,,1,0,0,,,
JAX00134078,5,108317299,+,GTTTCTTTCTACAGGCATTGATGACAGGAAGTCTCCCTGGCTTTGTTGAT,,G,A,1,rs13478449,,,,0,,,,1,0,0,,,
UNC9882519,5,108365211,-,GGCCTTTCCTCAACTCCCAGATGCCCTGCTCAGAGCTCCCCCTGTATCCC,,A,G,1,rs259571239,,,,0,,,,1,0,0,,,
mUNC050174346,5,109061266,+,TACAGATTCAGTGCAATCTCCATCAGAATTCAAACTCAATTCTTCACAAA,,T,C,4,rs252681529,,,,0,,,,1,0,0,,,
SBR054367537,5,109188437,-,TGGGTATATGCCCAGGAGAGTTATTGCTGGATCTACCAGTAGTACTATGT,,G,A,3,,,,,0,,,,1,0,0,,,
gUNCHS015357,5,109272045,-,ATTGTTCAATGTTTCAATGTACTTGAAAAACAATGTGGCCACTTCCGGTC,,G,A,4,rs29769178,,,,0,,,,1,0,0,,,
gUNC9898264,5,110189462,+,CCTGAGTTCAAATCCCAGCAACTACATGGTGACTCACAGCCATCTATAAT,,A,G,3,rs47972464,,,,0,,,,1,0,0,,,
SX1054407728,5,110193208,+,CATTGCAAAGGTGTGAAGGCACCTAAAACTCCAGAGGCTAAAGCAAGAGG,,G,A,1,rs29523676,,,,0,,,,1,0,0,,,
S3J054414896,5,110372402,+,GGTCTGCACTGAGGTTCTAACAAGCAAATCAACCCATCTTCTCAACTCAG,,C,A,1,rs50520949,C3H/HeJ,substrain,C3H/HeJ,0,A,,,1,0,0,,,
gUNC9903906,5,110634487,+,GATTCAGACAGTTTTAACCAGGTCCAGAGAAGGCAGGCCCAAGGCAAAGA,,A,G,1,rs29624276,,,,0,,,,1,0,0,,,
gUNC9903906b,5,110634487,+,GATTCAGACAGTTTTAACCAGGTCCAGAGAAGGCAGGCCCAAGGCAAAGA,,A,G,1,rs29624276,,,,0,,,,1,0,0,,,
SAC054434176,5,110854401,+,AGGTATAGTGGTGTTTCCCTAATTGGAACCAGATGGTAGCAGTTGCAGAG,,C,T,1,rs36692509,A,strain group,"A/J, A/JCr",0,T,,,1,0,0,,,
SNJ054439096,5,110977420,-,TCACTCACTCCACCTTCCATGGGAGGCTGCTTGCTCAACTGAAACACACA,,C,T,1,rs212152952,NOD/ShiLtJ,substrain,NOD/ShiLtJ,0,T,,,1,0,0,,CC,CC
mUNC050179659,5,111058873,-,TGAACACTGAAGCTACTTTCTGCTTACTAGAAATGGGAGGGGGGGTAGGA,,A,G,1,rs46244323,,,,0,,,,1,0,0,,,
UNCHS015409,5,111139624,+,CTTCTTGCCATTTTATCATGAGGCCAGTAACACAGTGAGAAAAGCAGGAG,,C,T,1,rs33311262,,,,0,,,,1,0,0,,,
UNC9913743,5,111439152,+,CAAATTCCATAAGAGGGACCTAGCTATTCTGTAGTCACCTAGTGGGGCTG,,T,C,1,rs29674027,,,,0,,,,1,0,0,,,
mUNC9920663,5,112051052,-,GGGGATAGTCATGTCCTCCTGCCTACAATGAGGAACACCGAGCTCCTCAG,,G,A,1,rs32103448,,,,0,,,,1,0,0,,,
SS1054490118,5,112252967,-,ATTTGTTATCCAAAGCCCTTGCTCCAGGCCCCCAGGGTTTTGCTTAGAAC,,G,A,1,rs228596271,129S1/SvImJ,substrain,129S1/SvImJ,0,A,,,1,0,0,,CC,CC
S6H054498303,5,112457578,+,AGGGCAGATGAGAGAGATTCCCTTTTCCCTCTACCCTTGGCCAAGCTAGG,,C,T,2,,C57BL/6JOlaHsd,substrain,C57BL/6JOlaHsd,0,T,,,1,0,0,,,
mbackupUNC050599122,5,112776054,-,GCTTCATATATCACAAGCTTCCCATAGGGTTTTGGAAGGAACACGGGTCG,,G,T,1,rs32129618,,,,0,,,,1,0,0,,,
S6N054515094,5,112877370,+,AGCAAGCATCCAAGATCTACAACCTAGCTGGGATAAAGCCTTCAGTTGTT,,G,A,1,rs216705073,C57BL/6NJ,substrain,C57BL/6NJ,0,A,,,1,0,0,,,
S6T054517578,5,112939462,+,CTAGGATCCAGGTCCAGCAGGTACACAGACTCATGCCCGAAACTGTCACA,,G,A,1,rs29555817,,,,0,,,,1,0,0,,,
gUNC9937689,5,113199672,+,AAAACAGTAATTCCCTCCCAAGCACACAATCTGGAGGAATTGGCTGATAC,,C,T,1,rs36601033,,,,0,,,,1,0,0,,,
SAJ054530791,5,113269789,-,TGCTGACTAGAGATGAGATTGCATTTGTTAATTAAATGGGATTGCTAGTA,,G,A,1,rs263871985,A/J,substrain,A/J,0,A,,,1,0,0,,CC,CC
S2C054533204,5,113330103,+,TAATCATTAGCCAGGAACTTCCCGAGGGGTCTAAACATCAAATACAATGT,,T,C,1,,DBA/2NCrl,substrain,DBA/2NCrl,0,C,,,1,0,0,,,
DSR054538895,5,113472395,-,ACAGGTGCTACCTTGCTAATTTCTCTTGTTCATAGAGAATTCCCACTGGC,,G,A,2,,129S2/SvPasOrlRj,substrain,129S2/SvPasOrlRj,0,A,,,1,0,0,SPIKE,,
B10050113545,5,113545177,+,TATTATTACCCGAGAACACCGACCCTTGGTACAAAGACTGGATTTTTTTT,TATTATTACCCGAGAACACCGACCCTTGGTACAAAGACTGGATTTTTTTA,T,A,1,rs256355638,,,,0,,,,1,0,0,,,
gUNC9954237,5,114347724,+,AGAGGATATGAAAAAAAACACCATCAAATGAAGGGACTTGGACCTAGGGA,,T,C,1,rs48380172,,,,0,,,,1,0,0,,,
gUNC9959892,5,114723199,+,GTTGGATGCATTTGTTGCAAAGCCTGATGAGTTTAGTACTTGAGACTCAC,,A,G,1,rs29583589,,,,0,,,,1,0,0,,,
DFH054592201,5,114805036,-,TTTACAGATTCAAATCAGGTCCTCAGTGTGTGGAGTGAGGTGGCTTAAAA,,G,T,1,,FVB/NHsd,substrain,FVB/NHsd,0,T,,,1,0,0,SPIKE,,
S2J054599538,5,114988467,-,AACCCAGGTCTTATGTAACAGCATCCGATGCAGGAGTGTGGGGCAATGGT,,G,T,1,rs222998249,DBA/2J,substrain,DBA/2J,0,T,,,1,0,0,,E3,Consensus
S6Y054610903,5,115272594,+,TGTTTCCTTCCTCAGCTTCTCAAAATGGAAGGAGAAGCGGCAAGGTGGGG,,T,C,1,rs48117995,,,,0,,,,1,0,0,,,
mUNC050412829,5,115430030,+,GATGTTCATCGGAGGACTCAGTTGGCAGACCACGCAGGGTGAGCCAGCCC,,A,G,1,rs242442993,,,,0,,,,1,0,0,,,
S6H054624625,5,115615648,-,CCCCTCTCTCTGCCTCCACAGCACATGGCATTTGGTCTCCTGCAAACAGA,,G,A,1,rs33463912,,,,0,,,,1,0,0,,,
D1J054629556,5,115738904,-,AGCAGCCCATGTGTATGCACTGCATTTTGCAAAATGTTGAATCAACTCAA,,G,A,1,,DBA/1J,substrain,DBA/1J,0,A,,,1,0,0,SPIKE,,
S3R054630105,5,115752629,-,GTTTTGTTGGGCTTGTTTTAATTTTATTACTGTGTGTTCATAGGTATGAC,,C,T,1,,C3H/He,strain group,"C3H/HeNRj, C3H/HeNTac",0,T,,,1,0,0,,,
gUNCHS015533,5,115908104,+,AGTAGACTCAGCTGGCTATGAATGAACCAGACTGCAGCGGTGACCCAACC,,A,G,1,rs47895514,,,,0,,,,1,0,0,,,
SS1054639028,5,115975702,-,GAACATTGCCTATTCATCCCAGAGAAAGGACCACCTGGCAGATTGACGGG,,A,C,1,rs241386374,129S1/SvImJ,substrain,129S1/SvImJ,0,C,,,1,0,0,,CC,CC
SFT054651738,5,116293462,+,ATACATCCCTTGAAGGCCAGGAGGCCAACACATTTCCAGATAGGTGAGCA,,T,C,1,rs36497303,,,,0,,,,1,0,0,,,
UNC9982516,5,116464064,+,ACAGTCACCAACTGCATGAGTGTTAAGCACACTCCATGAGAAGGCAGACT,,C,T,1,rs33354831,,,,0,,,,1,0,0,,,
SFT054660019,5,116500493,-,GTGAACCAAACAGGCAACATTCAGGCCCTTAAGAAACTTAGATTCATCGA,,T,C,1,rs36261742,,,,0,,,,1,0,0,,,
gUNC9988076,5,116803218,-,TAGCTAAGGACACAGGGACAGAGAATCATCTGCTGCCAGGCTGTTTTAGA,,C,T,1,rs29548930,,,,0,,,,1,0,0,,,
gUNC9993516,5,117146201,+,TAACCCTTAAACGGCACTAGAGCTGGGCAGCTGCCTATACCCTCTATGCT,,A,G,4,rs29584415,,,,0,,,,1,0,0,,,
D3R054689678,5,117241950,+,ACCCCTGAAGAATTTCCTGATAGCCATAAAGGCTTTGTAGAAGAGGCCAC,ACCCCTGAAGAATTTCCTGATAGCCATAAAGGCTTTGTAGAAGAGGCCAG,G,C,2,,C3H/HeNRj,substrain,C3H/HeNRj,0,C,,,1,0,0,SPIKE,,
SBJ054695332,5,117383306,+,TGGGGGTCAAGAACAATCAAAAGGGCTCAGGAGGCAGAACACCGAGGGCC,,C,T,1,rs236921927,BALB/cJ,substrain,BALB/cJ,0,T,,,1,0,0,,,
S3H054703850,5,117596260,+,TGCATGGTTGACCAACAGTCTCCAGAACTTTTCTTACTTCAACGGAAACT,,C,T,1,rs50261312,,,,0,,,,1,0,0,,,
S3H054705437,5,117635943,-,CAGGACAGAGTGACAGAAGCCAGATATCAGAGGGAAAAAAATGACTTCAT,,A,G,1,rs29770083,,,,0,,,,1,0,0,,,
gUNC10001966,5,117753021,+,ATAGTCACTCTGAGAGTCTAGACTTTAACATGAGAATCTGAGGGACCATC,,G,A,1,rs29728022,,,,0,,,,1,0,0,,,
UNCHS015573,5,117776977,-,GCTGAGAACGGCTCCGTGCTGGTCTGTGGCAGTGCTATTTTGCAGGACTC,,T,C,1,rs29506159,,,,0,,,,1,0,0,,,
gUNC10009291,5,118273675,-,GTTTCCATCTACACCCTAAAAGGAAATGGGTTGGTTTCCTTTCACCGGGT,,A,G,3,rs50219119,,,,0,,,,1,0,0,,,
UNCHS015602,5,118867667,+,ACTTTGCTGGAGGAATGGCAGCATCAGTCTGGGTTGAACATGTCCTAAGT,,A,G,1,rs36529066,,,,0,,,,1,0,0,,,
mUNC10016752,5,119058415,-,CTGACTTCCTCCTGGGAGGCAGGGGATTTGCAGGGTGTCAGTAGAGTGGC,,G,A,1,rs33266860,,,,0,,,,1,0,0,,,
mUNC10016752b,5,119058415,-,CTGACTTCCTCCTGGGAGGCAGGGGATTTGCAGGGTGTCAGTAGAGTGGC,,G,A,1,rs33266860,,,,0,,,,1,0,0,,,
SFR054767283,5,119182087,+,ACCTACTCCTCTGCTGATGGACATATCTGCTATGTTTATACTTCAGTCAC,,C,T,2,rs584904798,,,,0,,,,1,0,0,,,
S1L054770846,5,119271159,+,GGTGAACAAGACGCTGCCCTTCTCTGAACTTCCGTTTCTTCTTCTGTAGG,,C,T,1,,DBA/1LacJ,substrain,DBA/1LacJ,0,T,,,1,0,0,,,
S2H054775295,5,119382398,-,CATCATCTTCCTGCCTCAGCCTCTGAAGTGCTGGAATTACAGATTTGGGC,,A,G,1,rs48648294,,,,0,,,,1,0,0,,,
S3H054790476,5,119761912,-,TCACCCTCTCTTAGTCTCCTTTATACTTTTAGCCATTACCTTTGTGCTCG,,G,A,1,rs29681870,,,,0,,,,1,0,0,,,
S2R054791194,5,119779855,+,CCACCACCAAAATAACGTTATTAAGTCCACCGGGAAACTCACAATGGTGG,,A,G,2,,DBA/2JRj,substrain,DBA/2JRj,0,G,,,1,0,0,,,
S3H054794380,5,119859513,+,GCATTTGTAGGCTTTATAAAGGAGAAAAGGGTGCAGGGTTACCCCAGTTA,,T,C,1,rs33542931,,,,0,,,,1,0,0,,,
backupUNC050199022,5,119880785,+,GGTCTTCCATGAGAACGATGTACCATGTTTTCCCAGCAATGAGAGATGTT,,C,T,1,rs33533590,,,,0,,,,1,0,0,,,
gUNC10028869,5,119998890,+,ACTGCTGTTCATCACCACAAGAAGTCAGGACTGGAACTCAAGCAGGTCAG,,G,A,3,rs262414990,,,,0,,,,1,0,0,,,
gUNC10031771,5,120248930,+,CTGGGTTTGCTTTTCCCTAGGGACCAATAAACATCTTCTGTAAATGACAG,,T,G,1,rs32161284,,,,0,,,,1,0,0,,,
SBJ054817009,5,120425226,-,TATCTTTCCTAAGGCTCCACTGGGAACGAATTTGGGAGAATAAAGATATA,,C,T,1,rs245544651,BALB/cJ,substrain,BALB/cJ,0,T,,,1,0,0,,,
gJAX00135037,5,121118717,-,GGTGAACGAACTGGCTGGGTGACTGCCGGCTAAGACCCTGTTAGCTCCCT,,A,G,1,rs32189448,,,,0,,,,1,0,0,,,
[truncated: 958,431 more chars]
